# Supplementary material for: Phosphoproteomic insights into processes influenced by the kinase-like protein DIA1/C3orf58
Source: PeerJ. 2018 Apr 9;6:e4599. doi: 10.7717/peerj.4599 (PMC5896498; doi:10.7717/peerj.4599)
Supplement: Supplemental Information 4 — MaxQuant results for the phosphosite comparative analysis between DIA1-overexpressing and control cells. [file peerj-06-4599-s004.xlsx]

## Sheet: phospho_min4InEachGroup
Position	Proteins	Positions within proteins	Leading proteins	Protein	Protein names	Gene names	Sequence window	Student's T-test Significant DIA_WT	Student's T-test p-value DIA_WT	Student's T-test q-value DIA_WT	Student's T-test Difference DIA_WT	Student's T-test Test statistic DIA_WT	Intensity DIA1	Intensity DIA2	Intensity DIA3	Intensity DIA4	Intensity DIA5	Intensity DIA6	Intensity WT1	Intensity WT2	Intensity WT3	Intensity WT4	Intensity WT5	Intensity WT6	Amino acid	Charge	Multiplicity	Pfam domains	chain	coiled-coil region	compositionally biased region	cross-link	domain	modified residue	mutagenesis site	region of interest	sequence variant	short sequence motif	splice variant	topological domain	Motifs	Localization prob	PEP	Score	Delta score	Score for localization	Mass error [ppm]	Unique identifier	PhosphoSitePlus kinase
194	A0A024QZ33;Q9H0G5	194;248	A0A024QZ33	A0A024QZ33	Nuclear speckle splicing regulatory protein 1	CCDC55;NSRP1	ILQTDVKVEENPDADSDFDAKSSADDEIEET		0.0138211	0.132613	0.99658	3.04874	1.595	1.31181	2.01882	2.05538	1.57822	2.22414	NaN	-0.292866	1.07415	1.52442	1.16595	0.53159	S	2	___1		Nuclear speckle splicing regulatory protein 1					Phosphoserine							b-Adrenergic Receptor kinase substrate motif;Casein kinase I substrate motif;Casein kinase II substrate motif;G protein-coupled receptor kinase 1 substrate motif;Pyruvate dehydrogenase kinase substrate motif	1	1.09274e-27	276.63	220.42	226.74	0.53367	UID1
944	A0A024R4E5;Q00341;H0Y394	944;944;753	A0A024R4E5	A0A024R4E5	Vigilin	HDLBP	DEAGEGREAKDCDPGSPRRCDIIIISGRKEK	+	0.00248533	0.0487347	0.49511	4.33792	-0.047739	-0.0362225	-0.371077	-0.206644	-0.227295	-0.00759315	-0.696651	-0.920912	NaN	NaN	-0.392754	-0.567835	S	2	___1	KH_1	Vigilin				KH 11								Casein kinase I substrate motif;Cdc2 kinase substrate motif;CDK kinase substrate motif;CDK1,2,4,6 kinase substrate motif;ERK1,2 kinase substrate motif;Growth associated histone HI kinase substrate motif;GSK-3, ERK1, ERK2, CDK5 substrate motif;PKA kinase substrate motif;PKC kinase substrate motif;WW domain binding motif	1	0.00105297	100.79	86.025	100.79	-0.012468	UID2
31	A0A024R4E5;Q00341;C9JMQ6;C9JQ82;C9JBS3;C9JEJ8;C9JHN6;C9JT62;C9JHS7;C9JK79;C9JHZ8;C9JES8;C9JZI8;C9J5E5;C9JIZ1	31;31;31;31;31;31;31;31;31;31;31;31;31;31;31	A0A024R4E5	A0A024R4E5	Vigilin	HDLBP	RSGLVPQQIKVATLNSEEESDPPTYKDAFPP		0.0147543	0.139397	0.488271	3.00839	0.0878201	0.0783997	0.198397	0.0121078	0.291391	0.621944	0.106401	-0.408249	-0.715101	-0.27919	-0.0701675	NaN	S	2	___1		Vigilin					Phosphoserine							BARD1 BRCT domain binding motif;Casein kinase II substrate motif;G protein-coupled receptor kinase 1 substrate motif;GSK3 kinase substrate motif	1	1.71989e-42	301.43	266.69	278.72	0.28914	UID3
113	A0A0G2JL47;A0A024RCR6;A0A0G2JK23;P46379;F6TC96;F6UR09;F6U1F2;F6XTU0;A0A0G2JJR8;A0A1B0GX79;F6WML8;F6VEM6;F6X9W3;F6U341;F6S6P2;X6REW1;A0A0G2JJM1	113;113;113;113;113;113;113;113;113;113;113;113;113;113;113;113;113	A0A0G2JL47	A0A0G2JL47	Large proline-rich protein BAG6	BAT3;BAG6	ASSGTGSASATHGGGSPPGTRGPGASVHDRN		0.290484	0.595854	-0.269707	-1.13184	0.542616	1.06433	0.316206	NaN	1.30808	0.459915	1.38064	0.774473	1.20631	0.593182	1.08508	NaN	S	3	___1		Large proline-rich protein BAG6					Phosphoserine							ERK1,2 kinase substrate motif;G protein-coupled receptor kinase 1 substrate motif;GSK-3, ERK1, ERK2, CDK5 substrate motif;WW domain binding motif	0.996367	4.81514e-19	162.75	150.07	149.72	0.65488	UID4
967	A0A0G2JL47;A0A024RCR6;A0A0G2JK23;P46379;H0Y710	967;967;973;973;116	A0A0G2JL47	A0A0G2JL47	Large proline-rich protein BAG6	BAT3;BAG6	QGAERASPEPQRENASPAPGTTAEEAMSRGP		0.605497	0.832915	0.112472	0.537575	NaN	-0.0960312	0.0672169	0.426508	0.42609	0.893791	0.584009	0.147491	0.131041	NaN	0.404699	-0.112026	S	2	___1		Large proline-rich protein BAG6					Phosphoserine					In isoform 4.		Casein kinase I substrate motif;ERK1,2 kinase substrate motif;GSK-3, ERK1, ERK2, CDK5 substrate motif;WW domain binding motif	1	2.20118e-13	166.52	142.17	160.55	2.0058	UID5
21	H7C0E8;A0A067XG54;Q8NB49	21;442;445	H7C0E8	H7C0E8	Phospholipid-transporting ATPase;Phospholipid-transporting ATPase IG	ATP11C	DGHKYKGVTQEVDGLSQTDGTLTYFDKVDKN		0.522461	0.789329	0.152449	0.662768	1.12233	1.29199	1.38087	1.58233	1.19407	1.30092	1.08568	1.22931	1.46577	1.70359	1.32893	0.144533	S	3	___1	HAD	Phospholipid-transporting ATPase IG					Phosphoserine						Cytoplasmic	ATM kinase substrate motif;Casein kinase I substrate motif;Casein kinase II substrate motif;DNA dependent Protein kinase substrate motif;Pyruvate dehydrogenase kinase substrate motif	0.999755	2.91143e-52	280.32	248.79	161.51	0.13649	UID7
158	A0A087WSV0;Q9HB09	158;242	A0A087WSV0	A0A087WSV0	Bcl-2-like protein 12	BCL2L12	KLASDPALRSKLVRLSSDSFARLVELFCSRD		0.629384	0.834791	0.10799	0.497808	0.0692463	0.0933781	0.113136	0.269567	0.553249	0.284061	0.601139	0.601978	0.0821686	0.233522	-0.0441017	-0.740005	S	2	___1		Bcl-2-like protein 12					Phosphoserine					In isoform 2.		Casein kinase II substrate motif;PKA kinase substrate motif;PKC kinase substrate motif	0.999884	0.00015053	134.66	86.952	134.66	0.16271	UID11
102	A0A087WT18;Q96A73	102;183	A0A087WT18	A0A087WT18	Putative monooxygenase p33MONOX	KIAA1191	QPASAQSTPSTTPHSSPKQRPRGWFTSGSST		0.0487279	0.227745	-0.573547	-2.32251	-1.34015	NaN	-2.35454	-1.65679	-1.66689	-1.65136	-0.560427	NaN	-1.5958	-1.186	-1.00366	-1.45612	S	2	___1	P33MONOX	Putative monooxygenase p33MONOX					Phosphoserine					In isoform 3.		ERK1,2 kinase substrate motif;Growth associated histone HI kinase substrate motif;GSK-3, ERK1, ERK2, CDK5 substrate motif;MDC1 BRCT domain binding motif;PKA kinase substrate motif;PKC kinase substrate motif;Plk1 PBD domain binding motif;WW domain binding motif	0.833236	0.0145997	49.423	37.809	49.423	2.9056	UID12
156	A0A087WXZ1;A0A087WT22;E7ESS1;A0A087X1Q1;J3KP33;A0A087WZU8;A0A0U1RQC9;P04637	156;156;183;156;315;304;276;315	A0A087WXZ1	A0A087WXZ1	Cellular tumor antigen p53	TP53	PPGSTKRALPNNTSSSPQPKKKPLDGEYFTL		0.893988	0.962013	0.0211582	0.137559	3.99354	3.82976	4.19675	4.00121	3.68899	3.76135	4.32262	NaN	3.86897	3.62125	3.75026	NaN	S	2	___1		Cellular tumor antigen p53					Phosphoserine| by AURKA| CDK1 and CDK2		Interaction with CARM1;Interaction with HIPK1	In a sporadic cancer| somatic mutation.	Bipartite nuclear localization signal			ERK1,2 kinase substrate motif;GSK-3, ERK1, ERK2, CDK5 substrate motif;MDC1 BRCT domain binding motif;Plk1 PBD domain binding motif;WW domain binding motif	0.937805	5.00633e-13	209.25	170.1	203.29	-1.6705	UID14	AurA;CDK1;CDK2;CDK9
26	A0A087WTQ7;A0A087WV56;A0A087WW71;A0A087X0X5;Q92466	26;26;26;26;26	A0A087WTQ7	A0A087WTQ7	DNA damage-binding protein 2	DDB2	KTSEIVLRPRNKRSRSPLELEPEAKKLCAKG		0.0340863	0.192857	-0.647546	-2.49597	-0.865788	-0.816118	-1.46109	-1.40691	-0.685549	-0.382891	NaN	-0.459564	-0.310202	-0.915783	0.0550537	0.186266	S	2	___1		DNA damage-binding protein 2					Phosphoserine							14-3-3 domain binding motif;Calmodulin-dependent protein kinase II substrate motif;Casein kinase II substrate motif;ERK1,2 kinase substrate motif;Growth associated histone HI kinase substrate motif;GSK-3, ERK1, ERK2, CDK5 substrate motif;MAPKAPK2 kinase substrate motif;PKA kinase substrate motif;PKC kinase substrate motif;WW domain binding motif;ZIP kinase substrate motif	0.974021	4.57782e-08	198.74	150.17	198.74	2.0513	UID16
24	Q5JWB9;A0A087WTT2;Q96A57	24;24;24	Q5JWB9	Q5JWB9	Transmembrane protein 230	TMEM230	ATGIPSSKVKYSRLSSTDDGYIDLQFKKTPP		0.0369638	0.205205	0.697746	2.40554	2.9819	3.0669	2.71471	3.25924	2.71948	3.03892	2.59001	2.81945	2.31562	2.715	2.18328	0.971327	S	2	___1	DUF872	Transmembrane protein 230					Phosphoserine							14-3-3 domain binding motif;Calmodulin-dependent protein kinase II substrate motif;Calmodulin-dependent protein kinase IV substrate motif;Casein kinase II substrate motif;MAPKAPK2 kinase substrate motif;MDC1 BRCT domain binding motif;PKA kinase substrate motif;PKC kinase substrate motif;Plk1 PBD domain binding motif;Pyruvate dehydrogenase kinase substrate motif	0.999988	3.68566e-21	247.73	191.44	247.73	-0.39802	UID17
550	A0A087WUB9;Q8WYA6	550;545	A0A087WUB9	A0A087WUB9	Beta-catenin-like protein 1	CTNNBL1	RHIIKEYAENIGDGRSPEFRENEQKRILGLL		0.547208	0.808326	-0.094326	-0.623034	0.0839081	0.302002	-0.677826	-0.297964	0.129965	0.0306549	0.153841	-0.0939426	-0.0399284	-0.0178566	0.150045	-0.0154629	S	3	___1		Beta-catenin-like protein 1					Phosphoserine	No change in NLS binding nor folding						Casein kinase I substrate motif;Casein kinase II substrate motif;ERK1,2 kinase substrate motif;Growth associated histone HI kinase substrate motif;GSK-3, ERK1, ERK2, CDK5 substrate motif;WW domain binding motif	1	3.35143e-08	128.79	103.87	100.77	0.06007	UID20
1255	A0A087WUE6;Q9H869;Q3T8J9	1255;711;1255	A0A087WUE6	A0A087WUE6	YY1-associated protein 1;GON-4-like protein	GON4L;YY1AP1	NAFQGLEPKLEPQELSPLSATVFPKVEHSPG		0.0827657	0.304451	-0.320674	-1.98221	-2.74278	-2.58418	-2.78401	-2.82337	-2.84939	-2.12358	NaN	-2.06842	-2.48684	-2.49734	-2.26958	NaN	S	2	___1		GON-4-like protein;YY1-associated protein 1												Casein kinase II substrate motif;ERK1,2 kinase substrate motif;G protein-coupled receptor kinase 1 substrate motif;GSK-3, ERK1, ERK2, CDK5 substrate motif;WW domain binding motif	0.965072	0.0107468	55.452	36.377	55.452	1.8036	UID21
241	A0A087WUK2;O14979	241;241	A0A087WUK2	A0A087WUK2	Heterogeneous nuclear ribonucleoprotein D-like	HNRNPDL	LKGKEPPKKVFVGGLSPDTSEEQIKEYFGAF		0.170074	0.437722	0.243113	1.50765	-0.54438	-0.376715	-0.648232	-0.34647	NaN	0.0309467	-0.309307	-0.660534	-0.627186	-0.994802	-0.508583	NaN	S	2	___1	RRM_1	Heterogeneous nuclear ribonucleoprotein D-like				RRM 2	Phosphoserine							Casein kinase II substrate motif;ERK1,2 kinase substrate motif;G protein-coupled receptor kinase 1 substrate motif;GSK3 kinase substrate motif;GSK-3, ERK1, ERK2, CDK5 substrate motif;WW domain binding motif	0.999195	7.11515e-13	150.05	127.41	121.99	1.0032	UID22
190	A0A087WUT6;O60841	190;190	A0A087WUT6	A0A087WUT6	Eukaryotic translation initiation factor 5B	EIF5B	KERSRINSSGESGDESDEFLQSRKGQKKNQK		0.0421352	0.2113	0.608415	2.32882	2.22647	2.06455	2.8497	2.29217	2.55402	2.85515	1.1423	1.61124	2.10432	1.80648	2.77725	1.74998	S	2	___1		Eukaryotic translation initiation factor 5B					Phosphoserine							b-Adrenergic Receptor kinase substrate motif;Casein kinase II substrate motif;MAPKAPK2 kinase substrate motif	1	5.2401e-120	409.63	378.4	409.63	-1.1017	UID23
113	A0A087WUT6;O60841	113;113	A0A087WUT6	A0A087WUT6	Eukaryotic translation initiation factor 5B	EIF5B	KKGQKGKKQSFDDNDSEELEDKDSKSKKTAK	+	0.000591118	0.0306667	1.03653	5.47475	-0.580318	-0.648355	0.0512486	-0.679392	0.0682354	-0.307283	NaN	-1.1287	-1.46853	-1.54971	NaN	-1.39641	S	3	___1		Eukaryotic translation initiation factor 5B					Phosphoserine							b-Adrenergic Receptor kinase substrate motif;Casein kinase I substrate motif;Casein kinase II substrate motif;G protein-coupled receptor kinase 1 substrate motif	0.999969	9.38497e-09	130.37	115.06	130.37	-0.10914	UID24
166	A0A087WUV8;P35613	166;362	A0A087WUV8	A0A087WUV8	Basigin	BSG	KRRKPEDVLDDDDAGSAPLKSSGQHQNDKGK		0.844494	0.945224	-0.0416536	-0.201308	2.04669	1.97604	1.72516	2.20117	1.98898	1.84845	2.0747	2.29596	1.8916	2.0514	2.57003	1.15272	S	2	___1		Basigin					Phosphoserine						Cytoplasmic	Casein kinase I substrate motif	1	2.10629e-60	312.9	282.73	203.81	-0.17368	UID26
20	B0QY53;B0QY54;A0A087WUW0;Q9Y3M2	20;20;63;20	B0QY53	B0QY53	Protein chibby homolog 1	CBY1	GNTFSPKKTPPRKSASLSNLHSLDRSTREVE		0.976012	0.98986	-0.0082023	-0.0309149	-1.49989	-1.65015	-2.41995	-1.72597	-1.62821	-1.35422	-1.18012	-1.69997	-2.41182	-1.26143	-1.97098	NaN	S	2	___1	Chibby	Protein chibby homolog 1												Casein kinase II substrate motif;Phosphorylase kinase substrate motif;PKA kinase substrate motif;PKC kinase substrate motif	0.999494	0.000412217	103.85	71.694	103.85	-0.54522	UID27	Akt2;Akt1
209	B4DGW0;A0A087WUY7;O75928	209;528;499	B4DGW0	B4DGW0	E3 SUMO-protein ligase PIAS2	PIAS2	PPAKRKCIFMSETQSSPTKGVLMYQPSSVRV		0.61481	0.832657	0.117125	0.521196	-0.989943	-0.769033	-0.749567	-0.468903	-0.411711	-0.301121	NaN	-0.434597	-0.587193	-0.51285	-0.553577	-1.57264	S	2	___1		E3 SUMO-protein ligase PIAS2										In isoform 3.		Casein kinase II substrate motif;Cdc2 kinase substrate motif;CDK kinase substrate motif;CDK1,2,4,6 kinase substrate motif;ERK1,2 kinase substrate motif;Growth associated histone HI kinase substrate motif;GSK-3, ERK1, ERK2, CDK5 substrate motif;MDC1 BRCT domain binding motif;Plk1 PBD domain binding motif;WW domain binding motif	0.878319	1.9226e-15	228.38	191.96	162.31	-3.0203	UID28
2343	A0A087WUZ3;Q01082	2343;2341	A0A087WUZ3	A0A087WUZ3	Spectrin beta chain, non-erythrocytic 1	SPTBN1	AQTLPTSVVTITSESSPGKREKDKEKDKEKR		0.249334	0.555189	-0.14163	-1.23153	1.33233	1.18509	1.5019	1.46382	1.60922	1.75635	1.86278	1.65105	1.45248	1.44258	1.67318	NaN	S	2	___1		Spectrin beta chain| non-erythrocytic 1					Phosphoserine					In isoform 2.;In isoform Short.		Cdc2 kinase substrate motif;CDK kinase substrate motif;CDK1,2,4,6 kinase substrate motif;ERK1,2 kinase substrate motif;Growth associated histone HI kinase substrate motif;GSK-3, ERK1, ERK2, CDK5 substrate motif;MDC1 BRCT domain binding motif;Plk1 PBD domain binding motif;WW domain binding motif	0.990597	1.00892e-50	268.49	241.29	268.49	0.94402	UID30
66	K7EQH1;A0A087WVF1;Q5BIX2;Q96B23	66;66;66;66	K7EQH1	K7EQH1	Uncharacterized protein C18orf25	C18orf25;ARKL1	VISSMPCLLMELRRDSSESQLASTESDKPTT		0.157679	0.422445	0.372154	1.54111	0.940487	0.767866	0.762444	0.771688	1.71351	NaN	0.516479	0.684908	0.449945	0.416664	1.36579	0.280491	S	3	___1	RNF111_N	Uncharacterized protein C18orf25					Phosphoserine							14-3-3 domain binding motif;b-Adrenergic Receptor kinase substrate motif;Calmodulin-dependent protein kinase II substrate motif;Casein kinase II substrate motif;PAK2 kinase substrate motif;PKA kinase substrate motif;PKC epsilon kinase substrate motif;PKC kinase substrate motif	0.99143	6.38969e-19	174.89	169.43	150.11	-0.06337	UID34
74	A0A087WVQ2;I3L0Y2;I3L4Q4;Q9BUL5	74;78;65;74	A0A087WVQ2	A0A087WVQ2	PHD finger protein 23	PHF23	ASGSSSPLRGESAADSDGWDSAPSDLRTIQT		0.842409	0.943932	-0.087842	-0.205374	-0.807123	-1.18865	-0.654604	-0.638584	-0.924347	-1.54567	-2.33066	NaN	-0.534393	-0.197758	-0.425135	NaN	S	2	___1		PHD finger protein 23										In isoform 3.		b-Adrenergic Receptor kinase substrate motif;MAPKAPK2 kinase substrate motif	0.999996	6.61388e-13	153.72	134.98	153.72	-1.2167	UID36
139	A0A087WVV2;A0A0A0MRV0;Q9P2E9;V9GY78	139;615;615;90	A0A087WVV2	A0A087WVV2	Ribosome-binding protein 1	RRBP1	TESASVQGRNTDVAQSPEAPKQEAPAKKKSG		0.00755524	0.0922667	0.931603	3.3349	-0.516159	-0.8104	-0.643812	-0.260885	-0.492353	-0.647987	-0.86397	-0.676662	-2.36116	-1.56996	-1.41365	-2.07582	S	2	___1		Ribosome-binding protein 1					Phosphoserine						Cytoplasmic	Casein kinase II substrate motif;ERK1,2 kinase substrate motif;G protein-coupled receptor kinase 1 substrate motif;GSK-3, ERK1, ERK2, CDK5 substrate motif;WW domain binding motif	1	4.83219e-08	123.95	81.203	123.95	0.84826	UID37
801	A0A087WVV2;A0A0A0MRV0;Q9P2E9;A0A087WU26;F8W7S5	801;1277;1277;214;618	A0A087WVV2	A0A087WVV2	Ribosome-binding protein 1	RRBP1	KSHVEDGDIAGAPASSPEAPPAEQDPVQLKT		0.00281961	0.0534902	0.656866	4.06526	1.21386	1.14843	1.10905	1.24565	1.26665	0.585785	0.560869	0.844507	0.102243	0.326889	0.355673	NaN	S	3	___1		Ribosome-binding protein 1					Phosphoserine						Cytoplasmic	Casein kinase II substrate motif;ERK1,2 kinase substrate motif;G protein-coupled receptor kinase 1 substrate motif;GSK-3, ERK1, ERK2, CDK5 substrate motif;MDC1 BRCT domain binding motif;Plk1 PBD domain binding motif;WW domain binding motif	0.835284	1.10214e-09	126.59	108.57	126.59	0.23414	UID38
54	A0A087WVW8;A0A087X1Q4;A0A087X175;Q99624	54;54;54;54	A0A087WVW8	A0A087WVW8	Sodium-coupled neutral amino acid transporter 3	SLC38A3	ARSCMEGKSFLQKSPSKEPHFTDFEGKTSFG		0.164328	0.429692	-0.281165	-1.50071	-0.0479603	0.00223541	-0.864628	-0.397547	-0.218637	-0.612038	-0.089756	0.319128	-0.354128	-0.489325	-0.0433102	0.205807	S	3	___1		Sodium-coupled neutral amino acid transporter 3												Calmodulin-dependent protein kinase II substrate motif;Casein kinase II substrate motif;Chk1 kinase substrate motif;DNA dependent Protein kinase substrate motif;PKA kinase substrate motif;PKC kinase substrate motif	0.999967	7.76512e-08	130.02	110.22	130.02	-0.34388	UID41
595	H7C4X9;A0A087WVZ6;Q9ULU4;A0A087WV57;A0A087WYS3	595;663;668;643;668	H7C4X9	H7C4X9	Protein kinase C-binding protein 1	ZMYND8	PASEKADPGAVKDKASPEPEKDFSEKAKPSP		0.474236	0.759391	0.197934	0.746809	-0.239759	-0.477219	-1.28372	-0.613409	-0.367979	-0.000623703	-1.26649	-0.810778	-0.509583	-0.806112	-0.0822964	NaN	S	3	___1		Protein kinase C-binding protein 1					Phosphoserine							Casein kinase I substrate motif;Casein kinase II substrate motif;ERK1,2 kinase substrate motif;GSK-3, ERK1, ERK2, CDK5 substrate motif;PKA kinase substrate motif;PKC kinase substrate motif;WW domain binding motif	1	3.94242e-06	125.73	102.93	118.72	1.602	UID42
352	H7C4X9;A0A087WVZ6;Q9ULU4;A0A087WV57;A0A087WYS3	352;420;425;400;425	H7C4X9	H7C4X9	Protein kinase C-binding protein 1	ZMYND8	LMSKPVLSGGTGRRISLSDMPRSPMSTNSSV		0.422645	0.72079	0.19559	0.836067	0.243576	0.430378	-0.430803	-0.22867	0.048975	0.676268	0.441746	0.371239	-0.508699	-0.343788	-0.0656662	-0.32865	S	2	___1	DUF3544	Protein kinase C-binding protein 1					Phosphoserine					In isoform 2.		14-3-3 domain binding motif;Aurora-A kinase substrate motif;Calmodulin-dependent protein kinase II substrate motif;Casein kinase II substrate motif;PAK2 kinase substrate motif;Phosphorylase kinase substrate motif;PKA kinase substrate motif;PKC epsilon kinase substrate motif;PKC kinase substrate motif;Pyruvate dehydrogenase kinase substrate motif	0.999405	3.84004e-05	130.56	64.375	104.59	0.50507	UID44
17	A0A087WWC8;A0A0A0MQW0;A0A0A0MR39;Q9P2K5	17;17;17;17	A0A087WWC8	A0A087WWC8	Myelin expression factor 2	MYEF2	ADANKAEVPGATGGDSPHLQPAEPPGEPRRE		0.220595	0.509655	0.353161	1.31634	2.65266	2.79224	1.88717	2.04556	2.10304	2.56341	2.46556	2.05938	2.49879	1.39149	NaN	1.52238	S	3	___1		Myelin expression factor 2					Phosphoserine					In isoform 3.		b-Adrenergic Receptor kinase substrate motif;ERK1,2 kinase substrate motif;GSK-3, ERK1, ERK2, CDK5 substrate motif;WW domain binding motif	0.99976	2.38445e-09	137.5	115.49	137.5	1.4016	UID46
829	A0A087WWJ1;P52701	829;830	A0A087WWJ1	A0A087WWJ1	DNA mismatch repair protein Msh6	MSH6	LPDLERLLSKIHNVGSPLKSQNHPDSRAIMY		0.456441	0.744507	0.175608	0.774705	-0.930616	-0.671776	-0.610502	-0.371307	0.187126	0.184849	-0.186356	-0.364101	-1.03379	-0.726826	-0.383652	-0.571152	S	2	___1	MutS_III	DNA mismatch repair protein Msh6					Phosphoserine							Cdc2 kinase substrate motif;CDK kinase substrate motif;CDK1,2,4,6 kinase substrate motif;ERK1,2 kinase substrate motif;G protein-coupled receptor kinase 1 substrate motif;GSK3 kinase substrate motif;GSK-3, ERK1, ERK2, CDK5 substrate motif;WW domain binding motif	1	2.39926e-05	154.67	110.29	116.74	1.2706	UID48
226	A0A087WWJ1;P52701;C9J7Y7	226;227;128	A0A087WWJ1	A0A087WWJ1	DNA mismatch repair protein Msh6	MSH6	TTYVTDKSEEDNEIESEEEVQPKTQGSRRSS		0.977838	0.990168	0.00407775	0.0286595	0.647964	0.800894	1.37761	1.12844	0.917376	0.736877	NaN	0.864695	0.890568	0.940338	1.02753	NaN	S	2	___1		DNA mismatch repair protein Msh6					Phosphoserine					In isoform 4.		b-Adrenergic Receptor kinase substrate motif;BARD1 BRCT domain binding motif;Casein kinase I substrate motif;Casein kinase II substrate motif;G protein-coupled receptor kinase 1 substrate motif	1	5.53372e-64	337.71	312.98	261.74	0.63816	UID49
136	A0A087WWJ1;P52701;C9J7Y7;U3KQ72;C9JH55;C9J8Y8;F8WAX8	136;137;38;38;38;38;137	A0A087WWJ1	A0A087WWJ1	DNA mismatch repair protein Msh6	MSH6	EKGKSVRVHVQFFDDSPTRGWVSKRLLKPYT		0.877376	0.955677	-0.0247005	-0.158294	-0.203125	-0.00797081	0.208208	0.252026	0.445314	0.789658	0.152515	0.276142	0.287354	0.37995	0.493235	0.0431175	S	2	___1	PWWP	DNA mismatch repair protein Msh6				PWWP	Phosphoserine					In isoform 3.;In isoform 4.		b-Adrenergic Receptor kinase substrate motif;Casein kinase II substrate motif;Cdc2 kinase substrate motif;CDK kinase substrate motif;CDK1,2,4,6 kinase substrate motif;ERK1,2 kinase substrate motif;GSK-3, ERK1, ERK2, CDK5 substrate motif;WW domain binding motif	0.993605	4.90409e-12	230.36	178.01	138.55	1.0037	UID50
656	A0A087WWP4;Q96T37	656;700	A0A087WWP4	A0A087WWP4	Putative RNA-binding protein 15	RBM15	NSDNDRSSRLLLERPSPIRDRRGSLEKSQGD		0.74174	0.891185	0.0709893	0.338837	1.22115	1.06931	1.11726	1.15189	1.43352	1.83719	1.89623	1.24818	1.14841	0.698092	1.49051	0.922968	S	2	___1		Putative RNA-binding protein 15		Arg-rich			Phosphoserine							Casein kinase I substrate motif;Cdc2 kinase substrate motif;CDK kinase substrate motif;CDK1,2,4,6 kinase substrate motif;DNA dependent Protein kinase substrate motif;ERK1,2 kinase substrate motif;GSK-3, ERK1, ERK2, CDK5 substrate motif;PKA kinase substrate motif;PKC kinase substrate motif;WW domain binding motif	1	6.30249e-08	216.83	152.56	140.01	-0.032453	UID53
250	A0A087WWP4;Q96T37	250;294	A0A087WWP4	A0A087WWP4	Putative RNA-binding protein 15	RBM15	GHRHPPGGGGGQRSLSPGGAALGYRDYRLQQ		0.791385	0.919223	0.0437279	0.272502	1.98751	1.98399	1.77943	1.66599	1.93523	2.27056	2.35602	2.00664	1.69838	1.50254	1.90337	NaN	S	2	___1		Putative RNA-binding protein 15					Phosphoserine							14-3-3 domain binding motif;Calmodulin-dependent protein kinase II substrate motif;ERK1,2 kinase substrate motif;G protein-coupled receptor kinase 1 substrate motif;GSK-3, ERK1, ERK2, CDK5 substrate motif;PKA kinase substrate motif;PKC kinase substrate motif;WW domain binding motif	1	2.68505e-09	199.82	147.42	169.65	-0.22882	UID54
697	A0A087WWP4;Q96T37	697;741	A0A087WWP4	A0A087WWP4	Putative RNA-binding protein 15	RBM15	ERDRKHRTTAPTEGKSPLKKEDRSDGSAPST		0.739957	0.892303	0.0735486	0.341278	-0.773575	-0.78578	-1.25537	-1.01721	-1.40824	-0.825588	-0.496912	-0.746567	-1.08653	-1.76818	-1.00612	-1.40275	S	2	___1		Putative RNA-binding protein 15					Phosphoserine							Casein kinase I substrate motif;Cdc2 kinase substrate motif;CDK kinase substrate motif;CDK1,2,4,6 kinase substrate motif;ERK1,2 kinase substrate motif;Growth associated histone HI kinase substrate motif;GSK-3, ERK1, ERK2, CDK5 substrate motif;WW domain binding motif	0.985578	0.00550148	88.163	72.242	88.163	0.88567	UID57
560	A0A087WWS1;Q96FV9	560;560	A0A087WWS1	A0A087WWS1	THO complex subunit 1	THOC1	DEDEEDNDALLKENESPDVRRDKPVTGEQIE		0.348734	0.657971	-0.474917	-0.995308	-3.28093	-3.63513	-2.04602	-2.46843	-3.47097	NaN	-2.99151	-2.76512	-1.63623	-1.67485	-3.45918	NaN	S	2	___1		THO complex subunit 1					Phosphoserine					In isoform 2.		b-Adrenergic Receptor kinase substrate motif;Casein kinase I substrate motif;ERK1,2 kinase substrate motif;GSK-3, ERK1, ERK2, CDK5 substrate motif;PKA kinase substrate motif;WW domain binding motif	1	1.45022e-13	161.39	143.29	45.161	0.96562	UID58
1741	A0A087WY61;Q14980;H0YFY6	1741;1757;606	A0A087WY61	A0A087WY61	Nuclear mitotic apparatus protein 1	NUMA1	PRTQPDGTSVPGEPASPISQRLPPKVESLES		0.33452	0.640253	-0.185264	-1.01393	2.24457	1.92455	2.22948	1.98285	2.01601	2.45663	2.76495	2.46259	2.36315	1.99397	2.65756	1.72346	S	2	___1		Nuclear mitotic apparatus protein 1					Phosphoserine		Tail (Globular)			In isoform Numa-m.;In isoform Numa-s.		Casein kinase I substrate motif;Casein kinase II substrate motif;ERK1,2 kinase substrate motif;GSK-3, ERK1, ERK2, CDK5 substrate motif;WW domain binding motif	0.949356	4.14527e-31	230.67	201.14	135.18	-0.067379	UID63
264	A0A087WY82;Q9Y624	264;284	A0A087WY82	A0A087WY82	Junctional adhesion molecule A	F11R	TKKGTSSKKVIYSQPSARSEGEFKQTSSFLV		0.750803	0.896427	0.113609	0.327467	-1.04174	-0.955275	-2.09723	-1.08974	-2.04464	-1.56748	-1.14736	-0.90785	-1.76889	-1.51935	NaN	-2.55469	S	2	___1		Junctional adhesion molecule A					Phosphoserine						Cytoplasmic	Casein kinase II substrate motif;DNA dependent Protein kinase substrate motif;PKA kinase substrate motif;PKC kinase substrate motif	0.975386	0.0187865	55.353	27.34	45.653	-3.8584	UID64	PKCA
200	A0A087WYN9;Q7Z478	200;200	A0A087WYN9	A0A087WYN9	ATP-dependent RNA helicase DHX29	DHX29	KSRPKFQSPQIQATISPPLQPKTKTYEEDPK		0.366217	0.674216	-0.228633	-0.95147	-1.0959	-1.2973	-0.577639	-1.17906	-0.681557	-0.571302	-0.533579	-0.689877	-1.3271	-0.786083	-0.0224915	NaN	S	2	___1		ATP-dependent RNA helicase DHX29					Phosphoserine							ERK1,2 kinase substrate motif;GSK-3, ERK1, ERK2, CDK5 substrate motif;WW domain binding motif	0.998902	3.05156e-15	171.98	155.09	171.98	1.4261	UID65
777	A0A087WYW3;P30414	777;1077	A0A087WYW3	A0A087WYW3	NK-tumor recognition protein;Putative peptidyl-prolyl cis-trans isomerase	NKTR	SEEDLSGKHDTVTVSSDLDQFTKDDSKLSIS		0.114521	0.362689	0.299352	1.77095	-1.41495	-1.49819	-0.953417	-0.958565	-0.950903	-0.659483	-1.3221	-1.53713	-1.29018	-1.33833	NaN	NaN	S	2	___1		NK-tumor recognition protein												Casein kinase II substrate motif;MDC1 BRCT domain binding motif;Plk1 PBD domain binding motif;Pyruvate dehydrogenase kinase substrate motif	0.863749	2.61527e-08	134.21	105.4	57.348	-2.0366	UID66
163	A0A087WYW3;P30414	163;463	A0A087WYW3	A0A087WYW3	NK-tumor recognition protein;Putative peptidyl-prolyl cis-trans isomerase	NKTR	CRRHKQTKKRRILIPSDIESSKSSTRRMKSS	+	0.00116941	0.0411429	0.681736	4.91633	-0.156744	-0.38859	-0.372404	-0.136057	-0.366404	0.205967	-0.779106	-0.937405	-0.697506	-1.12241	NaN	NaN	S	2	___1		NK-tumor recognition protein					Phosphoserine							Casein kinase II substrate motif;DNA dependent Protein kinase substrate motif;G protein-coupled receptor kinase 1 substrate motif;GSK3 kinase substrate motif	0.999589	7.42004e-07	138.45	82.732	138.45	0.39323	UID67
846	A0A087WYW3;P30414	846;1146	A0A087WYW3	A0A087WYW3	NK-tumor recognition protein;Putative peptidyl-prolyl cis-trans isomerase	NKTR	ICTPDRSSPAKVEETSPLGNARLDTPDINIV		0.498407	0.775663	0.154791	0.702478	-0.407066	-0.531839	-0.772278	-0.265652	-0.370701	-0.00604248	0.0179176	-0.210737	-0.803589	-1.12938	-0.199001	-0.957531	S	2	___1		NK-tumor recognition protein					Phosphoserine							Casein kinase I substrate motif;ERK1,2 kinase substrate motif;GSK-3, ERK1, ERK2, CDK5 substrate motif;WW domain binding motif	0.99956	7.71644e-11	223.71	155.99	145.09	-0.58086	UID68
540	A0A087WYY3;Q9H7F0	540;817	A0A087WYY3	A0A087WYY3	Probable cation-transporting ATPase 13A3	ATP13A3	SAIDPEAIPVKLVHDSLEDLQMTRYHFAMNG		0.252029	0.556763	-0.245477	-1.224	-1.77686	-1.59908	-2.23955	-1.7634	-1.40366	-1.07196	NaN	-1.34825	-1.55904	-1.59371	-1.02026	-1.46346	S	2	___1	HAD	Probable cation-transporting ATPase 13A3					Phosphoserine							b-Adrenergic Receptor kinase substrate motif;Casein kinase II substrate motif;Pyruvate dehydrogenase kinase substrate motif	1	7.04455e-07	128.9	108.12	128.9	1.802	UID69
205	E5RFQ9;A0A087WZ06;Q13188	205;205;316	E5RFQ9	E5RFQ9	Serine/threonine-protein kinase 3;Serine/threonine-protein kinase 3 36kDa subunit;Serine/threonine-protein kinase 3 20kDa subunit	STK3	RHEEQQRELEEEEENSDEDELDSHTMVKTSV		0.310028	0.61752	1.12637	1.10866	NaN	NaN	-0.30228	0.557159	0.408482	1.03141	NaN	-3.63126	NaN	0.24115	0.4219	0.157513	S	3	___1		Serine/threonine-protein kinase 3;Serine/threonine-protein kinase 3 36kDa subunit	+				Phosphoserine							Casein kinase I substrate motif;Casein kinase II substrate motif;Pyruvate dehydrogenase kinase substrate motif	0.999997	2.46162e-19	183.42	159.07	183.42	-0.55488	UID70
567	A0A087WZ13;E9PAU2	567;584	A0A087WZ13	A0A087WZ13		RAVER1	GSSSSKAFQLKSRLLSPLSSARLPPEPGLSD		0.763415	0.90476	0.0937426	0.310277	0.343031	0.535349	-0.499411	0.0366783	0.571287	0.666569	0.906181	0.626312	-0.414782	-0.223841	0.0153351	NaN	S	2	___1														14-3-3 domain binding motif;Calmodulin-dependent protein kinase II substrate motif;Casein kinase II substrate motif;ERK1,2 kinase substrate motif;G protein-coupled receptor kinase 1 substrate motif;GSK3 kinase substrate motif;GSK-3, ERK1, ERK2, CDK5 substrate motif;MAPKAPK1 kinase substrate motif;MAPKAPK2 kinase substrate motif;PKA kinase substrate motif;PKC kinase substrate motif;WW domain bindi…	0.999999	0.00012186	117.52	58.17	115.18	0.19458	UID71
617	A0A087WZ13;E9PAU2;K7EQG2	617;634;35	A0A087WZ13	A0A087WZ13		RAVER1	REPALGPHGPSRHKMSPPPSGFGERSSGGSG		0.0442558	0.217682	-1.16795	-2.33674	-0.00933647	-0.419598	-1.32404	-1.4494	-0.883734	-2.60584	1.17798	-0.0493412	-0.379906	-0.664553	0.178923	NaN	S	2	___1														ERK1,2 kinase substrate motif;G protein-coupled receptor kinase 1 substrate motif;GSK3 kinase substrate motif;GSK-3, ERK1, ERK2, CDK5 substrate motif;PKA kinase substrate motif;PKC kinase substrate motif;WW domain binding motif	1	0.000373678	107.97	88.835	107.97	0.34119	UID72
17	A0A087WZ13;E9PAU2;Q8IY67;K7EKR9	17;34;17;12	A0A087WZ13	A0A087WZ13	Ribonucleoprotein PTB-binding 1	RAVER1	AADVSVTHRPPLSPKSGAEVEAGDAAERRAP		0.0102556	0.110264	-0.626093	-3.15442	-2.98336	-3.05549	-2.12633	-2.28602	-2.81182	-2.77457	-2.04645	-2.01058	-1.97062	-1.79947	-1.8221	-2.63183	S	2	___1		Ribonucleoprotein PTB-binding 1												Casein kinase II substrate motif	1	0.0238746	51.211	36.649	51.211	2.7358	UID73
491	A0A087WZP2;Q9UI36	491;493	A0A087WZP2	A0A087WZP2	Dachshund homolog 1	DACH1	PSRVETSVIKERVPDSPSPAPSLEEGRRPGS		0.018725	0.142726	-0.613055	-2.86181	-1.13172	-1.21763	-1.74889	-1.67578	-1.59958	-1.16494	-0.187342	-0.619749	-1.18772	-1.21496	-0.840403	NaN	S	2	___1		Dachshund homolog 1										In isoform 3.;In isoform 4.		b-Adrenergic Receptor kinase substrate motif;Casein kinase II substrate motif;ERK1,2 kinase substrate motif;G protein-coupled receptor kinase 1 substrate motif;GSK-3, ERK1, ERK2, CDK5 substrate motif;WW domain binding motif	0.994082	0.000495339	89.507	66.866	89.507	0.39301	UID74
389	A0A087X055;Q92766	389;1320	A0A087X055	A0A087X055	Ras-responsive element-binding protein 1	RREB1	VAGDAPVEQATAETASPVHREEHGRGESHEP		0.62299	0.832377	-0.102351	-0.507232	0.0566387	0.0728989	-0.0547371	-0.242409	0.157053	0.606224	0.389969	0.685562	0.137985	0.191765	0.329502	-0.525011	S	3	___1		Ras-responsive element-binding protein 1										In isoform 3.;In isoform 5.;In isoform 6.		Casein kinase I substrate motif;ERK1,2 kinase substrate motif;GSK-3, ERK1, ERK2, CDK5 substrate motif;WW domain binding motif	0.996915	6.3161e-27	197.99	159.26	195.01	1.3737	UID75
127	A0A087X0H9;Q5T8P6	127;127	A0A087X0H9;Q5T8P6	Q5T8P6	RNA-binding protein 26	RBM26	KEEEREKKFSRRLNHSPPQSSSRYRENRSRD		0.871336	0.952267	-0.0518602	-0.166168	0.835215	0.705711	1.33002	0.96092	2.0506	0.651707	0.104872	1.42681	1.33464	1.32727	1.66096	0.99078	S	3	___1		RNA-binding protein 26					Phosphoserine					In isoform 4| isoform 5.;In isoform 6.		ERK1,2 kinase substrate motif;G protein-coupled receptor kinase 1 substrate motif;GSK3 kinase substrate motif;GSK-3, ERK1, ERK2, CDK5 substrate motif;WW domain binding motif	1	6.27301e-11	161.25	127.08	130.78	-0.25053	UID77
900	A0A087X0K9;G5E9E7	900;916	A0A087X0K9	A0A087X0K9		TJP1	PYSPQAQPQPIHRIDSPGFKPASQQVYRKDP		0.518128	0.784116	-0.107664	-0.672547	-1.52617	-1.24192	-1.78019	-1.55986	-1.38703	NaN	-1.29854	-1.46697	-1.12949	-1.96891	-1.18789	-1.29642	S	3	___1														14-3-3 domain binding motif;b-Adrenergic Receptor kinase substrate motif;Calmodulin-dependent protein kinase II substrate motif;Calmodulin-dependent protein kinase IV substrate motif;Chk1 kinase substrate motif;ERK1,2 kinase substrate motif;GSK-3, ERK1, ERK2, CDK5 substrate motif;PKA kinase substrate motif;PKC kinase substrate motif;WW domain binding motif	0.999995	0.000393034	89.231	64.337	89.231	0.65308	UID78
96	C9JZJ7;A0A087X0X0;C9J453;A0A087X255;O15344	96;96;96;96;96	C9JZJ7	C9JZJ7	E3 ubiquitin-protein ligase Midline-1	MID1	NIIDRFQKASVSGPNSPSETRRERAFDANTM		0.276948	0.582056	-0.195225	-1.15728	-1.63061	-1.68415	-1.0384	-0.911259	-0.976797	-1.59182	-1.19274	-1.09579	-1.051	-1.21098	-1.00089	NaN	S	2	___1		E3 ubiquitin-protein ligase Midline-1												Casein kinase II substrate motif;ERK1,2 kinase substrate motif;G protein-coupled receptor kinase 1 substrate motif;GSK-3, ERK1, ERK2, CDK5 substrate motif;MAPKAPK2 kinase substrate motif;WW domain binding motif	0.80041	0.00297509	80.746	56.953	64.104	1.025	UID79
218	A0A087X151;Q9UBW7	218;305	A0A087X151	A0A087X151	Zinc finger MYM-type protein 2	ZMYM2	ASFPRNQKQPGVDSLSPVASLPKQIFQPSVQ		0.23813	0.539936	-0.287078	-1.26358	-1.35938	-1.17793	-1.53879	-1.59912	-2.06009	-0.938787	-0.577009	-1.35115	-1.07008	-1.28792	-1.50688	NaN	S	2	___1		Zinc finger MYM-type protein 2					Phosphoserine							Casein kinase I substrate motif;ERK1,2 kinase substrate motif;G protein-coupled receptor kinase 1 substrate motif;GSK3 kinase substrate motif;GSK-3, ERK1, ERK2, CDK5 substrate motif;WW domain binding motif	0.987496	0.00361539	71.08	47.76	71.08	1.7888	UID80	PLK1
213	A0A087X1M6;G5E9X3;Q9Y2H6	213;213;213	A0A087X1M6	A0A087X1M6	Fibronectin type-III domain-containing protein 3A	FNDC3A	KDKMSSPPSSPQKCPSPINEHNGLIKGQIAG		0.171108	0.439342	0.249292	1.4873	-1.44956	-1.22793	-1.72695	-1.44394	-1.36363	-1.32236	-1.27717	-1.35056	NaN	-2.18401	-1.73841	-1.80829	S	2	___1		Fibronectin type-III domain-containing protein 3A					Phosphoserine							DNA dependent Protein kinase substrate motif;ERK1,2 kinase substrate motif;GSK-3, ERK1, ERK2, CDK5 substrate motif;PKA kinase substrate motif;PKC kinase substrate motif;WW domain binding motif	1	0.00630081	76.357	56.367	76.357	-0.80302	UID81
203	A0A087X1M6;G5E9X3;Q9Y2H6	203;203;203	A0A087X1M6	A0A087X1M6	Fibronectin type-III domain-containing protein 3A	FNDC3A	KKLKDRQGTQKDKMSSPPSSPQKCPSPINEH		0.165319	0.432649	0.567752	1.51002	-1.5512	-1.41396	-1.09169	-0.379631	-0.852732	-1.57555	-2.86754	-1.13493	NaN	-1.00652	-1.4596	-2.0908	S	2	___1		Fibronectin type-III domain-containing protein 3A					Phosphoserine							Casein kinase II substrate motif;ERK1,2 kinase substrate motif;G protein-coupled receptor kinase 1 substrate motif;GSK3 kinase substrate motif;GSK-3, ERK1, ERK2, CDK5 substrate motif;MDC1 BRCT domain binding motif;PKA kinase substrate motif;PKC kinase substrate motif;Plk1 PBD domain binding motif;WW domain binding motif	0.99999	1.46112e-05	152.47	103.17	152.47	3.4459	UID82
326	A0A087X2C4;H0YAH0;O60245	326;701;1011	A0A087X2C4	A0A087X2C4	Protocadherin-7	PCDH7	YKSSSPLPTVQLHPQSPTAGKKHQAVQDLPP		0.876414	0.955168	-0.0806705	-0.160569	-0.596354	-0.40593	NaN	-0.743519	-0.239582	-1.44612	NaN	-0.111349	-0.100447	-0.165554	-0.218145	-2.43266	S	3	___1	Protocadherin	Protocadherin-7					Phosphoserine						Cytoplasmic	Casein kinase II substrate motif;ERK1,2 kinase substrate motif;GSK-3, ERK1, ERK2, CDK5 substrate motif;WW domain binding motif	0.780379	2.41339e-05	98.957	84.997	86.987	1.665	UID84
1379	A0A088AWL3;O75376;E7EVK1	1379;1472;103	A0A088AWL3	A0A088AWL3	Nuclear receptor corepressor 1	NCOR1	SVLRSTLHEAPKAQLSPGIYDDTSARRTPVS		0.907239	0.968994	-0.0379695	-0.119844	-0.05159	-0.1805	-0.718649	-0.757086	-0.316689	-0.0657883	NaN	0.308277	-0.522503	-0.443232	0.412827	-1.30744	S	2	___1		Nuclear receptor corepressor 1					Phosphoserine		Interaction with ETO			In isoform 3.		ERK1,2 kinase substrate motif;GSK-3, ERK1, ERK2, CDK5 substrate motif;PKA kinase substrate motif;WW domain binding motif	1	4.34049e-13	190.44	143.56	190.44	1.9369	UID86
2055	A0A088AWL3;O75376;E7EVK1;J3KS29;J3QKP0	2055;2151;782;92;91	A0A088AWL3	A0A088AWL3	Nuclear receptor corepressor 1	NCOR1	SPERSHVSSEPYEPISPPQVPVVHEKQDSLL		0.0688358	0.268712	-0.330712	-2.10095	-0.648472	-0.265337	-0.725765	NaN	-0.245865	-0.61932	0.0825348	-0.153049	-0.521935	-0.350107	0.0913582	NaN	S	3	___1		Nuclear receptor corepressor 1					Phosphoserine		Interaction with C1D			In isoform 3.		Casein kinase I substrate motif;ERK1,2 kinase substrate motif;GSK-3, ERK1, ERK2, CDK5 substrate motif;WW domain binding motif	0.999998	1.21247e-05	102.21	94.309	100.88	1.5898	UID87
2088	A0A088AWL3;O75376;E7EVK1;J3KS29;J3QKP0	2088;2184;815;125;124	A0A088AWL3	A0A088AWL3	Nuclear receptor corepressor 1	NCOR1	SQRGAEPAEQRNDARSPGSISYLPSFFTKLE		0.60871	0.832907	-0.110017	-0.528456	-1.29686	-0.848839	-0.519291	-1.15111	-0.200171	-0.731045	-0.365816	-0.691275	-0.877699	-0.668777	-0.330029	-1.15361	S	2	___1		Nuclear receptor corepressor 1					Phosphoserine		Interaction with C1D			In isoform 3.		Casein kinase I substrate motif;Casein kinase II substrate motif;ERK1,2 kinase substrate motif;Growth associated histone HI kinase substrate motif;GSK-3, ERK1, ERK2, CDK5 substrate motif;WW domain binding motif	0.999999	3.45222e-27	261.67	240.04	261.67	0.41191	UID88
2024	A0A088AWL3;O75376;E7EVK1;J3KS29;J3QKP0	2024;2120;751;62;60	A0A088AWL3	A0A088AWL3	Nuclear receptor corepressor 1	NCOR1	SQAQSVHHQRPGSRVSPENLVDKSRGSRPGK		0.172862	0.442051	-0.304419	-1.49662	-0.130022	NaN	-0.603151	-0.609022	-0.244118	-0.155516	0.43708	0.143631	-0.500608	-0.374977	0.0751419	NaN	S	2	___1		Nuclear receptor corepressor 1							Interaction with C1D			In isoform 3.		Casein kinase II substrate motif;ERK1,2 kinase substrate motif;GSK-3, ERK1, ERK2, CDK5 substrate motif;PKA kinase substrate motif;PKC kinase substrate motif;WW domain binding motif	1	0.00182716	89.266	53.997	70.195	0.38237	UID89
927	A0A0A0MT38;Q6ZSL5;A0A088AWN3;A0A0A0MSY4;Q9BZ29	927;938;938;926;927	A0A0A0MT38	A0A0A0MT38	Dedicator of cytokinesis protein 9	DOCK9	RSYVKYAYKAEPYVASEYKTVHEELTKSMTT		0.762516	0.904749	0.0791323	0.314214	-1.62601	-2.00347	-2.24697	-1.79292	NaN	-1.21385	-1.32757	NaN	-2.06674	-2.02918	-1.99961	NaN	S	2	___1		Dedicator of cytokinesis protein 9												G protein-coupled receptor kinase 1 substrate motif	0.985863	0.0285965	48.004	32.565	48.004	0.75079	UID90
687	A0A096LNX8;Q96GP6	687;687	A0A096LNX8	A0A096LNX8	Scavenger receptor class F member 2	SCARF2	WIHGKHSAAAAGRAPSPPPPGSEAAPSPSKR		0.141151	0.402486	0.495785	1.65865	-1.64451	NaN	-2.42471	-1.80958	-1.58244	-1.82428	NaN	NaN	-2.65112	-2.93522	-1.65969	-2.16552	S	2	___1		Scavenger receptor class F member 2		Pro-rich									Cytoplasmic	14-3-3 domain binding motif;Calmodulin-dependent protein kinase II substrate motif;DNA dependent Protein kinase substrate motif;ERK1,2 kinase substrate motif;G protein-coupled receptor kinase 1 substrate motif;GSK-3, ERK1, ERK2, CDK5 substrate motif;PKA kinase substrate motif;PKC kinase substrate motif;WW domain binding motif	0.999518	0.0155627	50.207	35.064	50.207	4.6795	UID91
245	F8W7U3;J3KP36;E7ESD2;A0A0A0MR88;A0A096LPC5;Q9Y4E1;Q641Q2	245;277;333;333;333;333;333	F8W7U3	F8W7U3	WASH complex subunit FAM21C;WASH complex subunit FAM21A	FAM21A;FAM21C	KPRKTLKEKKERRTPSDDEEDNLFAPPKLTD		0.792823	0.919804	-0.215051	-0.272877	-3.63272	NaN	-1.29124	-0.992201	-0.452248	-0.828434	-2.77262	NaN	-0.879568	-0.765018	-0.480061	NaN	S	2	___1		WASH complex subunit FAM21A;WASH complex subunit FAM21C										In isoform 5.		14-3-3 domain binding motif;BARD1 BRCT domain binding motif;Calmodulin-dependent protein kinase II substrate motif;Casein kinase II substrate motif;DNA dependent Protein kinase substrate motif;PKA kinase substrate motif;PKC kinase substrate motif;ZIP kinase substrate motif	0.868269	0.0320606	54.598	48.357	54.598	-0.36321	UID96
285	F5H0Q6;A0A0A0MQS2;Q8N2M8	285;285;285	F5H0Q6	F5H0Q6	CLK4-associating serine/arginine rich protein	CLASRP	QRREFREKRLRGRKISPPSYARRDSPTYDPY		0.404643	0.705196	-0.180762	-0.87011	-0.605581	-0.650953	-1.26657	-1.3917	-0.886147	-0.577938	-0.433033	-0.49828	-0.269819	-0.864799	-1.10285	-1.12554	S	2	___1		CLK4-associating serine/arginine rich protein					Phosphoserine							14-3-3 domain binding motif;Akt kinase substrate motif;Calmodulin-dependent protein kinase II substrate motif;Casein kinase II substrate motif;ERK1,2 kinase substrate motif;GSK-3, ERK1, ERK2, CDK5 substrate motif;MAPKAPK1 kinase substrate motif;PKA kinase substrate motif;PKC epsilon kinase substrate motif;PKC kinase substrate motif;WW domain binding motif	0.999997	0.00718031	82.417	43.849	82.417	0.56913	UID97
294	F5H0Q6;A0A0A0MQS2;Q8N2M8	294;294;294	F5H0Q6	F5H0Q6	CLK4-associating serine/arginine rich protein	CLASRP	LRGRKISPPSYARRDSPTYDPYKRSPSESSS		0.652037	0.846859	-0.123869	-0.46479	-0.7001	-0.44001	-0.879288	-0.496307	-0.323107	-0.204033	0.463217	-0.0803394	-0.917032	-1.02711	0.0286312	-0.767	S	2	___1		CLK4-associating serine/arginine rich protein												14-3-3 domain binding motif;b-Adrenergic Receptor kinase substrate motif;Calmodulin-dependent protein kinase II substrate motif;Calmodulin-dependent protein kinase IV substrate motif;Casein kinase II substrate motif;ERK1,2 kinase substrate motif;GSK-3, ERK1, ERK2, CDK5 substrate motif;PAK2 kinase substrate motif;PKA kinase substrate motif;PKC epsilon kinase substrate motif;PKC kinase substrate mo…	0.997917	1.8251e-05	196.7	149.14	196.7	0.44392	UID98
115	A0A0A0MR02;P45880;Q5JSD2;Q5JSD1	115;115;115;115	A0A0A0MR02	A0A0A0MR02	Voltage-dependent anion-selective channel protein 2	VDAC2	DQICQGLKLTFDTTFSPNTGKKSGKIKSSYK		0.609203	0.831916	0.13343	0.52772	2.2012	2.16498	1.91058	2.36027	1.83673	2.68387	2.53571	2.41535	2.02718	2.16484	2.18418	1.02978	S	2	___1	Porin_3	Voltage-dependent anion-selective channel protein 2												Casein kinase II substrate motif;ERK1,2 kinase substrate motif;GSK-3, ERK1, ERK2, CDK5 substrate motif;WW domain binding motif	1	5.61072e-84	389.07	325.66	389.07	0.087979	UID101
95	Q5T092;A0A0A0MR06;Q5T091;O15258	95;95;95;95	Q5T092	Q5T092	Protein RER1	RER1	IAFLSPKVDPSLMEDSDDGPSLPTKQNEEFR		0.71254	0.882848	0.0712337	0.381816	0.820293	0.941013	0.557138	1.17394	0.792013	0.981344	NaN	0.22407	1.01349	0.994816	0.993185	NaN	S	2	___1	Rer1	Protein RER1					Phosphoserine							b-Adrenergic Receptor kinase substrate motif;G protein-coupled receptor kinase 1 substrate motif	0.999903	2.77142e-29	221.9	200.06	189.87	-0.47221	UID102
182	C9JW01;A0A0C4DG68;A0A0A0MR59;Q8TB72	182;73;126;182	C9JW01	C9JW01	Pumilio homolog 2	PUM2	ADCKDFNRTPGSRQASPTEVVERLGPNTNPS		0.577279	0.825309	0.171091	0.576105	0.196568	0.239969	-0.211548	-0.0266399	0.480749	0.535969	0.716612	0.532331	-0.454462	0.116005	0.331942	-1.05391	S	2	___1		Pumilio homolog 2					Phosphoserine		Interaction with SNAPIN					14-3-3 domain binding motif;Calmodulin-dependent protein kinase II substrate motif;Casein kinase II substrate motif;ERK1,2 kinase substrate motif;GSK-3, ERK1, ERK2, CDK5 substrate motif;MAPKAPK2 kinase substrate motif;PKA kinase substrate motif;PKC kinase substrate motif;WW domain binding motif	1	5.89616e-06	199.19	154.2	169.82	0.57626	UID103
862	A0A0A0MR66;P98175	862;797	A0A0A0MR66	A0A0A0MR66	RNA-binding protein 10	RBM10	GLHKQNLEIHRRAHLSENELEALEKNDMEQM		0.558812	0.81	0.113444	0.607061	-0.978333	-1.03305	-0.951132	-1.37577	-0.93454	-0.595606	-0.613144	-0.95805	NaN	-1.35423	-0.974129	-1.55803	S	2	___1		RNA-binding protein 10					Phosphoserine							Casein kinase II substrate motif;G protein-coupled receptor kinase 1 substrate motif	1	2.24268e-05	124.16	99.698	81.703	-0.94665	UID104
803	A0A0A0MR66;P98175	803;738	A0A0A0MR66	A0A0A0MR66	RNA-binding protein 10	RBM10	SPPRGLVAAYSGESDSEEEQERGGPEREEKL		0.86294	0.948353	-0.0307401	-0.178273	0.345343	0.054678	0.465021	0.407011	-0.0351925	0.393806	NaN	-0.204308	0.557287	0.42462	0.432472	NaN	S	2	___1		RNA-binding protein 10					Phosphoserine							b-Adrenergic Receptor kinase substrate motif;BARD1 BRCT domain binding motif;Casein kinase I substrate motif;Casein kinase II substrate motif;G protein-coupled receptor kinase 1 substrate motif	0.999805	5.76764e-30	232.95	202.4	199.01	0.2246	UID105
154	A0A0A0MR66;P98175	154;89	A0A0A0MR66	A0A0A0MR66	RNA-binding protein 10	RBM10	PGSETQRRRRRRHRHSPTGPPGFPRDGDYRD		0.906478	0.968814	0.0450983	0.120495	1.08273	0.931103	0.313274	0.168974	0.436312	0.342768	1.58635	1.22301	0.0661316	-0.69124	0.718477	0.101837	S	2	___1		RNA-binding protein 10					Phosphoserine					In isoform 3| isoform 4.		Casein kinase II substrate motif;ERK1,2 kinase substrate motif;G protein-coupled receptor kinase 1 substrate motif;GSK-3, ERK1, ERK2, CDK5 substrate motif;PKA kinase substrate motif;PKC kinase substrate motif;WW domain binding motif	0.999998	7.60088e-15	240.05	209.44	219.33	-0.55014	UID106
788	A0A0A0MR66;P98175	788;723	A0A0A0MR66	A0A0A0MR66	RNA-binding protein 10	RBM10	HTSMDLPKLASDDRPSPPRGLVAAYSGESDS		0.915775	0.971856	0.0304702	0.108462	1.3321	1.31517	0.565247	0.77412	0.565689	1.55105	1.77189	1.3389	0.575323	0.286379	1.09006	0.857992	S	2	___1		RNA-binding protein 10					Phosphoserine							Casein kinase I substrate motif;Cdc2 kinase substrate motif;CDK kinase substrate motif;CDK1,2,4,6 kinase substrate motif;DNA dependent Protein kinase substrate motif;ERK1,2 kinase substrate motif;GSK-3, ERK1, ERK2, CDK5 substrate motif;PKA kinase substrate motif;PKC kinase substrate motif;WW domain binding motif	1	1.65245e-07	176.86	132.25	176.86	0.2175	UID107
593	A0A0A0MRA8;A0A0A0MSA4;Q9Y2J2;A8K968;A0A1B0GTF8;A0A0J9YW26;A0A0J9YY18;A0A0J9YW31;A0A0J9YWN0;A0A0J9YWE1;A0A0J9YWS4	593;451;762;472;484;157;96;73;89;96;92	A0A0A0MRA8	A0A0A0MRA8	Band 4.1-like protein 3;Band 4.1-like protein 3, N-terminally processed	EPB41L3	TDTAVTNEWEKRLSTSPVRLAARQEDAPMIE		0.26889	0.576208	-0.218699	-1.17063	-1.56061	-1.42907	-2.09046	-1.60629	-2.05434	-1.83493	-1.61827	-0.928898	-2.07692	-1.59802	-1.54169	-1.4997	S	2	___1	SAB	Band 4.1-like protein 3;Band 4.1-like protein 3| N-terminally processed							Spectrin--actin-binding					Cdc2 kinase substrate motif;CDK kinase substrate motif;CDK1,2,4,6 kinase substrate motif;ERK1,2 kinase substrate motif;Growth associated histone HI kinase substrate motif;GSK-3, ERK1, ERK2, CDK5 substrate motif;WW domain binding motif	0.802565	0.00506943	88.37	18.114	88.37	0.57418	UID108
88	A0A0A0MRA8;A0A0A0MSA4;Q9Y2J2;J3QS55;J3KS70;J3QKY2;J3KRD1;J3QKK4;J3QR33	88;88;88;88;88;88;88;88;88	A0A0A0MRA8	A0A0A0MRA8	Band 4.1-like protein 3;Band 4.1-like protein 3, N-terminally processed	EPB41L3	AAKQLEYQQLEDDKLSQKSSSSKLSRSPLKI		0.220807	0.508869	-0.2557	-1.30596	0.825392	0.832903	0.649137	0.931942	1.12296	0.820093	1.5259	1.52235	1.10424	1.15752	1.123	0.283619	S	3	___1		Band 4.1-like protein 3;Band 4.1-like protein 3| N-terminally processed					Phosphoserine							ATM kinase substrate motif;Casein kinase I substrate motif;Casein kinase II substrate motif;DNA dependent Protein kinase substrate motif;G protein-coupled receptor kinase 1 substrate motif;GSK3 kinase substrate motif;PKA kinase substrate motif;PKC kinase substrate motif	1	1.25042e-26	251	194.28	212.85	0.35269	UID109
448	A0A0A0MRA8;A0A0A0MSA4;A8K968;A0A1B0GTF8;A0A0J9YW26;J3KT37	448;306;339;339;12;105	A0A0A0MRA8	A0A0A0MRA8		EPB41L3	SSSKRYTMSRSLDGASVNENHEIYMKDSMSA		0.900288	0.965651	-0.0238419	-0.128517	-0.0872669	-0.25157	-0.435795	-0.214989	0.205151	0.495497	0.500946	0.141277	-0.201742	-0.12409	-0.334663	-0.127649	S	2	___1														Casein kinase I substrate motif;Casein kinase II substrate motif	1	1.45961e-17	183.74	152.26	183.74	-0.44405	UID110
793	A0A0A0MRA8;A0A0A0MSA4;Q9Y2J2;A8K968;A0A0J9YY18;J3QS83	793;921;962;631;296;15	A0A0A0MRA8	A0A0A0MRA8	Band 4.1-like protein 3;Band 4.1-like protein 3, N-terminally processed	EPB41L3	ESSTVKTETISFGSVSPGGVKLEISTKEVPV		0.476185	0.759873	-0.134475	-0.752683	-0.594948	-0.610567	-0.79767	-0.346857	-0.347567	NaN	-0.160938	-0.0742035	NaN	-0.774601	-0.610443	NaN	S	2	___1		Band 4.1-like protein 3;Band 4.1-like protein 3| N-terminally processed					Phosphoserine		C-terminal (CTD)			In isoform 3.		ERK1,2 kinase substrate motif;GSK-3, ERK1, ERK2, CDK5 substrate motif;WW domain binding motif	0.995277	5.87943e-17	173.36	148.56	173.36	0.2695	UID111
103	A0A0A0MRI1;Q8IXQ4	103;105	A0A0A0MRI1	A0A0A0MRI1	GPALPP motifs-containing protein 1	GPALPP1	FFGPALPPGFKKQDDSPPRPIIGPALPPGFI		0.106358	0.351302	-0.482801	-1.81935	-1.5281	-0.925135	NaN	-1.87224	-0.694592	-1.16255	-0.575846	-0.71769	-1.07316	NaN	-0.26358	-1.13833	S	3	___1		GPALPP motifs-containing protein 1					Phosphoserine					In isoform 2.;In isoform 3.		b-Adrenergic Receptor kinase substrate motif;Cdc2 kinase substrate motif;CDK kinase substrate motif;CDK1,2,4,6 kinase substrate motif;ERK1,2 kinase substrate motif;G protein-coupled receptor kinase 1 substrate motif;GSK-3, ERK1, ERK2, CDK5 substrate motif;PKA kinase substrate motif;WW domain binding motif	1	0.00749817	51.31	45.73	51.31	-0.019025	UID113
903	H0Y7V8;A0A0A0MRJ1;H0Y5V1;A0A0A0MRJ0;Q5VT25	903;937;967;1618;1651	H0Y7V8	H0Y7V8	Non-specific serine/threonine protein kinase;Serine/threonine-protein kinase MRCK alpha	CDC42BPA	ARSSAQNGSALKREFSGGSYSAKRQPMPSPS		0.304487	0.617712	0.261512	1.12266	NaN	NaN	-3.68591	-3.63431	-3.03288	-3.06984	NaN	-3.22995	-3.96958	-3.67823	-3.59123	NaN	S	2	___1		Serine/threonine-protein kinase MRCK alpha					Phosphoserine							14-3-3 domain binding motif;Calmodulin-dependent protein kinase II substrate motif;Calmodulin-dependent protein kinase IV substrate motif;Casein kinase II substrate motif;Chk1 kinase substrate motif;PKA kinase substrate motif;PKC epsilon kinase substrate motif;PKC kinase substrate motif	0.991595	0.0186884	54.982	38.828	54.982	1.2484	UID114
406	A0A0A0MRM9;Q14978	406;397	A0A0A0MRM9	A0A0A0MRM9	Nucleolar and coiled-body phosphoprotein 1	NOLC1	GTTKNSSNKPAVTTKSPAVKPAAAPKQPVGG	+	0.00122005	0.04	1.51109	4.88279	-2.41541	-3.09089	-2.2666	-1.87143	-1.63919	-2.56406	NaN	-4.38026	-3.86782	-3.5677	-3.4603	NaN	S	2	___1		Nucleolar and coiled-body phosphoprotein 1					Phosphoserine		11 X 12 AA approximate repeats of an acidic serine cluster		Nuclear localization signal			ERK1,2 kinase substrate motif;Growth associated histone HI kinase substrate motif;GSK-3, ERK1, ERK2, CDK5 substrate motif;WW domain binding motif	1	0.0101949	64.64	46.654	64.64	3.0671	UID116
416	A0A0A0MRN0;Q5VTL8	416;527	A0A0A0MRN0	A0A0A0MRN0	Pre-mRNA-splicing factor 38B	PRPF38B	HSDSKDQSDKHDRRRSQSIEQESQEKQHKNK		0.594063	0.831766	-0.166393	-0.550495	0.859285	0.850368	2.20663	2.26853	1.61844	1.32046	1.36861	1.28886	2.1933	2.09109	1.78549	1.39472	S	2	___1		Pre-mRNA-splicing factor 38B					Phosphoserine					In isoform 2.		14-3-3 domain binding motif;ATM kinase substrate motif;Calmodulin-dependent protein kinase II substrate motif;Casein kinase II substrate motif;DNA dependent Protein kinase substrate motif;PAK2 kinase substrate motif;PKA kinase substrate motif;PKC epsilon kinase substrate motif;PKC kinase substrate motif	1	9.22682e-49	336.8	262.92	192.35	0.68278	UID117
494	A0A0A0MSA7;A0A0U1RQK7;O43432	494;684;495	A0A0A0MSA7	A0A0A0MSA7	Eukaryotic translation initiation factor 4 gamma 3	EIF4G3	QTEEILDSQNLNSRRSPVPAQIAITVPKTWK		0.853634	0.946514	-0.0548277	-0.189314	-1.14406	-1.21144	-0.70846	-0.952402	-0.609764	-0.0794716	-0.0274754	-0.624414	-1.29655	-1.2528	-0.0858746	-1.08953	S	2	___1		Eukaryotic translation initiation factor 4 gamma 3					Phosphoserine					In isoform 4.		ERK1,2 kinase substrate motif;G protein-coupled receptor kinase 1 substrate motif;Growth associated histone HI kinase substrate motif;GSK-3, ERK1, ERK2, CDK5 substrate motif;PKA kinase substrate motif;PKC kinase substrate motif;WW domain binding motif	1	1.68352e-11	150.68	118.62	150.68	0.46307	UID124
22	A0A0A0MSK5;J3KN66;Q5JTV8;H0YDU3;H0YD16	22;143;143;46;15	A0A0A0MSK5	A0A0A0MSK5	Torsin-1A-interacting protein 1	TOR1AIP1	TRLQQQHSEQPPLQPSPVMTRRGLRDSHSSE		0.789119	0.917635	-0.0485001	-0.274726	4.76539	4.49587	4.09583	4.29858	4.28702	4.50382	5.02962	4.51167	4.32348	4.22628	4.66129	3.98517	S	2	___1		Torsin-1A-interacting protein 1					Phosphoserine						Nuclear	DNA dependent Protein kinase substrate motif;ERK1,2 kinase substrate motif;G protein-coupled receptor kinase 1 substrate motif;GSK-3, ERK1, ERK2, CDK5 substrate motif;WW domain binding motif	0.999905	1.12708e-35	242.48	219.61	242.48	1.009	UID128	CDK2
115	A2ABK4;A0A0G2JI50;E9PD43;A0A0A0MT02;A0A0A0MSN9;P18615	115;115;115;115;115;115	A2ABK4	A2ABK4	Negative elongation factor E	NELFE	EKGPVPTFQPFQRSISADDDLQESSRRPQRK		0.00493938	0.0729143	0.69303	3.84111	1.48125	2.0337	1.23083	1.37768	1.31924	1.31927	NaN	NaN	0.893335	0.953136	0.832121	0.390604	S	2	___1		Negative elongation factor E					Phosphoserine							14-3-3 domain binding motif;Calmodulin-dependent protein kinase II substrate motif;Calmodulin-dependent protein kinase IV substrate motif;Casein kinase II substrate motif;PKA kinase substrate motif;PKC kinase substrate motif;Pyruvate dehydrogenase kinase substrate motif	1	2.22509e-26	270.79	235.06	253.16	1.1559	UID130
51	A2ABK4;A0A0G2JI50;E9PD43;A0A0A0MT02;A0A0A0MSN9;P18615	51;51;51;51;51;51	A2ABK4	A2ABK4	Negative elongation factor E	NELFE	SSSSTTSQGGVKRSLSEQPVMDTATATEQAK		0.405682	0.705643	0.174252	0.868117	-0.688519	-0.57436	-0.691444	-0.781244	-0.516386	-0.275366	0.0591831	-0.653509	-1.03171	-1.05449	-0.686085	-1.20621	S	2	___1		Negative elongation factor E												14-3-3 domain binding motif;AMP-activated protein kinase substrate motif;Calmodulin-dependent protein kinase I substrate motif;Calmodulin-dependent protein kinase II substrate motif;Calmodulin-dependent protein kinase IV substrate motif;Chk1 kinase substrate motif;G protein-coupled receptor kinase 1 substrate motif;PKA kinase substrate motif;PKC kinase substrate motif	0.941775	4.62591e-06	116.96	100.08	92.633	3.2647	UID131
283	H7C1L3;A0A0A0MSU2;A0A1C7CYX1;Q6PJG2	283;461;461;461	H7C1L3	H7C1L3	ELM2 and SANT domain-containing protein 1	ELMSAN1	LRGGVIQSTRRRRRASQEANLLTLAQKAVEL		0.048755	0.227067	-0.50494	-2.27758	-0.599604	-1.03327	-0.56543	-0.912868	-0.970341	0.113825	0.156487	-0.0452499	-0.212627	-0.579441	-0.100876	NaN	S	2	___1		ELM2 and SANT domain-containing protein 1					Phosphoserine							14-3-3 domain binding motif;Akt kinase substrate motif;ATM kinase substrate motif;Calmodulin-dependent protein kinase II substrate motif;Casein kinase II substrate motif;DNA dependent Protein kinase substrate motif;MAPKAPK1 kinase substrate motif;PAK2 kinase substrate motif;Pim1 kinase substrate sequence;PKA kinase substrate motif;PKC epsilon kinase substrate motif;PKC kinase substrate motif;ZIP …	1	1.63499e-11	151.56	90.159	130.29	-1.3541	UID132
695	A0A0A0MT33;Q9UPN6	695;617	A0A0A0MT33	A0A0A0MT33	Protein SCAF8	SCAF8	VKSSEPVKETVQTTQSPTPVEKETVVTTQAE		0.397616	0.703044	-0.166463	-0.888069	2.51968	2.4133	2.2165	2.53658	2.18698	NaN	3.1088	2.63703	2.51755	2.37284	2.6804	1.92981	S	2	___1		Protein SCAF8					Phosphoserine							Casein kinase II substrate motif;ERK1,2 kinase substrate motif;GSK-3, ERK1, ERK2, CDK5 substrate motif;WW domain binding motif	0.999848	3.18901e-95	351.03	305.03	331.42	0.020485	UID135
1382	Q9HBD4;A0A0A0MT49;P51532;K7EP28	1382;1413;1382;72	Q9HBD4	Q9HBD4	Transcription activator BRG1	SMARCA4	FGRGSRHRKEVDYSDSLTEKQWLKKITGKDI		0.0276249	0.167423	-0.471148	-2.62409	-0.953445	-0.640589	-1.05122	-1.08468	-1.393	-0.904575	0.0729256	-0.630627	-0.599289	-0.814203	-0.69599	NaN	S	2	___1	SnAC	Transcription activator BRG1					Phosphoserine							b-Adrenergic Receptor kinase substrate motif;Casein kinase II substrate motif	0.958832	3.65154e-07	145.31	92.595	145.31	0.26818	UID137
1139	A0A0A0MT60;Q5T1M5	1139;1114	A0A0A0MT60	A0A0A0MT60	Peptidyl-prolyl cis-trans isomerase;FK506-binding protein 15	FKBP15	TSDPEEGDPLALGPESPGEPQPPQLKKDDVT		0.203588	0.486928	-0.367462	-1.38452	-1.21802	-0.966055	-0.242437	-1.29089	NaN	-0.814575	-1.10401	-0.733032	-0.323565	-0.549696	0.0156403	NaN	S	3	___1		FK506-binding protein 15					Phosphoserine					In isoform 3.		b-Adrenergic Receptor kinase substrate motif;Casein kinase II substrate motif;ERK1,2 kinase substrate motif;G protein-coupled receptor kinase 1 substrate motif;GSK-3, ERK1, ERK2, CDK5 substrate motif;WW domain binding motif	0.999678	0.000892577	57.688	46.164	57.688	0.038622	UID141
981	A0A0A0MT60;Q5T1M5	981;956	A0A0A0MT60	A0A0A0MT60	Peptidyl-prolyl cis-trans isomerase;FK506-binding protein 15	FKBP15	SEEEEEKAEERPRRPSQEQSASASSGQPQAP		0.0489471	0.2264	-0.431693	-2.27518	0.861217	0.938597	1.17207	0.858023	1.49451	0.86319	NaN	1.52127	1.59952	1.76015	1.61821	0.815651	S	3	___1		FK506-binding protein 15					Phosphoserine					In isoform 3.		14-3-3 domain binding motif;Akt kinase substrate motif;ATM kinase substrate motif;Calmodulin-dependent protein kinase II substrate motif;Casein kinase II substrate motif;DNA dependent Protein kinase substrate motif;G protein-coupled receptor kinase 1 substrate motif;GSK3 kinase substrate motif;MAPKAPK1 kinase substrate motif;PAK2 kinase substrate motif;PKA kinase substrate motif;PKC epsilon kinas…	0.999696	1.66563e-36	223.9	199.49	223.9	0.12587	UID142
1189	A0A0A0MT60;Q5T1M5	1189;1164	A0A0A0MT60	A0A0A0MT60	Peptidyl-prolyl cis-trans isomerase;FK506-binding protein 15	FKBP15	GAALRPSHHSQRSSLSGDEEDELFKGATLKA		0.559603	0.809297	0.187138	0.603519	-1.03823	-1.19519	-0.843004	-0.924417	-0.672594	-0.599291	-1.11551	-0.789768	-0.804279	-0.411335	-0.798801	-2.47586	S	2	___1		FK506-binding protein 15					Phosphoserine					In isoform 3.		Casein kinase II substrate motif	0.999792	3.29719e-11	159.75	145.95	113.76	0.88854	UID143
477	A0A0A0MTG6;Q12770	477;851	A0A0A0MTG6	A0A0A0MTG6	Sterol regulatory element-binding protein cleavage-activating protein	SCAP	RLSDGGKAGPEEPGDSPPLRHRPRGPPPPSL		0.862352	0.9482	0.0414818	0.179868	NaN	NaN	-1.26176	-0.812237	-0.608156	-0.358692	-0.441835	-0.506342	-1.05945	-0.885086	-1.11576	NaN	S	2	___1		Sterol regulatory element-binding protein cleavage-activating protein							Interaction with SREBF2			In isoform 3.	Cytoplasmic	b-Adrenergic Receptor kinase substrate motif;ERK1,2 kinase substrate motif;GSK-3, ERK1, ERK2, CDK5 substrate motif;WW domain binding motif	1	0.0016279	88.101	69.321	88.101	1.2665	UID145
448	A0A0A0MTG6;Q12770	448;822	A0A0A0MTG6	A0A0A0MTG6	Sterol regulatory element-binding protein cleavage-activating protein	SCAP	GDCLTRIPRPGQRRDSGVGSGLEAQESWERL		0.306416	0.617233	-0.301028	-1.0925	NaN	0.275156	-1.3748	-0.814384	-0.536049	-0.730848	-0.341232	-0.131134	-0.554153	-0.294998	-0.354269	NaN	S	2	___1		Sterol regulatory element-binding protein cleavage-activating protein					Phosphoserine		Interaction with SREBF2			In isoform 3.	Cytoplasmic	14-3-3 domain binding motif;b-Adrenergic Receptor kinase substrate motif;Calmodulin-dependent protein kinase II substrate motif;G protein-coupled receptor kinase 1 substrate motif;GSK3 kinase substrate motif;PAK2 kinase substrate motif;PKA kinase substrate motif;PKC epsilon kinase substrate motif;PKC kinase substrate motif	0.999372	1.75434e-06	119.27	88.308	64.136	2.9039	UID146
250	E5RJN3;A0A0A6YYG7;Q6IBW4	250;284;284	E5RJN3	E5RJN3	Condensin-2 complex subunit H2	NCAPH2	EASAPKAALEPKESRSPQQSAALPRRYMLRE		0.118928	0.373678	-0.262952	-1.70543	1.37818	1.36238	1.52718	1.38827	1.37824	1.23002	2.26527	1.8679	1.3993	1.50579	1.53681	1.26691	S	2	___1	CNDH2_M	Condensin-2 complex subunit H2					Phosphoserine							Casein kinase I substrate motif;ERK1,2 kinase substrate motif;G protein-coupled receptor kinase 1 substrate motif;Growth associated histone HI kinase substrate motif;GSK3 kinase substrate motif;GSK-3, ERK1, ERK2, CDK5 substrate motif;PKA kinase substrate motif;WW domain binding motif	1	3.59371e-06	206.1	170.3	202.65	-0.70344	UID151
119	H7C446;A8MV53;A0A0A6YYI3;A0A0B4J1V8;Q9NQ55	119;306;359;359;359	H7C446	H7C446	Suppressor of SWI4 1 homolog	PPAN;PPAN-P2RY11	RKKSLEGMKKARVGGSDEEASGIPSRTASLE		0.0179684	0.143651	0.489492	2.88712	3.02607	2.60064	2.85148	2.86633	2.78741	3.48413	2.66627	2.13498	2.63746	NaN	2.57545	2.21842	S	2	___1		Suppressor of SWI4 1 homolog					Phosphoserine							BARD1 BRCT domain binding motif;Casein kinase II substrate motif;G protein-coupled receptor kinase 1 substrate motif	1	6.88909e-96	334.79	281.57	334.79	0.46199	UID152
802	A0A0A6YYJ5;O94854	802;666	A0A0A6YYJ5	A0A0A6YYJ5	Uncharacterized protein KIAA0754	MACF1;KIAA0754	LNVASSEGGEMERRDSDSFLNIFPEKQVTKA		0.559885	0.809084	0.187754	0.603078	-2.39659	-2.20202	-1.49706	-1.47798	-1.28482	-1.38139	-2.95355	-2.23141	-1.56875	-1.49258	-1.36016	-1.75992	S	2	___1		Uncharacterized protein KIAA0754												14-3-3 domain binding motif;AMP-activated protein kinase substrate motif;b-Adrenergic Receptor kinase substrate motif;Calmodulin-dependent protein kinase I substrate motif;Calmodulin-dependent protein kinase II substrate motif;Calmodulin-dependent protein kinase IV substrate motif;Casein kinase II substrate motif;Chk1 kinase substrate motif;PAK2 kinase substrate motif;PKA kinase substrate motif;P…	0.997899	9.62466e-07	131.96	101.35	131.96	0.49821	UID153
96	F8W860;A0A0B4J1S8;Q9UBF8	96;440;428	F8W860	F8W860	Phosphatidylinositol 4-kinase beta	PI4KB	SVPARIPENRIRSTRSVENLPECGITHEQRA		0.783817	0.914467	0.0496491	0.283737	-0.354322	0.20117	-0.215597	-0.109118	0.12077	0.150471	NaN	-0.537075	0.1689	0.164526	-0.132698	NaN	S	2	___1		Phosphatidylinositol 4-kinase beta					Phosphoserine							AMP-activated protein kinase substrate motif;Casein kinase II substrate motif	1	9.41227e-22	228.76	178.6	228.76	-1.1041	UID154
38	H0YEG1;F5GY88;A0A0B4J1W0;O75448	38;881;887;862	H0YEG1	H0YEG1	Mediator of RNA polymerase II transcription subunit 24	MED24	FPLDDVQPSKLMRLLSSNEDDANILSSPTDR		0.624116	0.832781	-0.0875622	-0.505569	0.693335	0.899269	0.718777	0.658533	0.442495	0.677753	0.759789	1.21706	0.925501	0.894327	0.79261	0.026247	S	2	___1	Med24_N	Mediator of RNA polymerase II transcription subunit 24					Phosphoserine							14-3-3 domain binding motif;Calmodulin-dependent protein kinase II substrate motif;Calmodulin-dependent protein kinase IV substrate motif;Casein kinase II substrate motif;Chk1 kinase substrate motif;PKA kinase substrate motif;PKC kinase substrate motif	0.999759	1.65716e-102	384.57	343.61	384.57	-0.23347	UID155
185	G3V207;G5E963;A0A1B0GUZ3;A0A0C4DFR1;Q9ULS5;O75069	185;198;213;243;216;438	G3V207	G3V207	Transmembrane and coiled-coil domains protein 3;Transmembrane and coiled-coil domains protein 2	TMCC3;TMCC2	NKSREFANLIRNKFGSADNIAHLKNSLEEFR		0.250139	0.556317	-0.396782	-1.22927	-1.09457	-1.26639	-2.95236	-1.89603	-2.1331	-1.49512	-1.18588	-1.1442	-1.69095	-1.43262	-1.59376	NaN	S	2	___1	Tmemb_cc2	Transmembrane and coiled-coil domains protein 2;Transmembrane and coiled-coil domains protein 3												PKA kinase substrate motif;PKC kinase substrate motif	1	0.0285245	48.741	36.515	48.741	-0.14938	UID156
350	A0A0C4DG07;O60934	350;432	A0A0C4DG07	A0A0C4DG07	Nibrin	NBN	VSNTLAKMRIPNYQLSPTKLPSINKSKDRAS	+	0.00187362	0.0455385	-0.595825	-4.18471	1.18178	1.10112	1.02308	0.950809	0.893505	1.45483	2.14423	1.95242	1.44966	1.47495	1.5532	1.60563	S	2	___1		Nibrin					Phosphoserine							Casein kinase II substrate motif;Cdc2 kinase substrate motif;CDK kinase substrate motif;CDK1,2,4,6 kinase substrate motif;ERK1,2 kinase substrate motif;GSK-3, ERK1, ERK2, CDK5 substrate motif;WW domain binding motif	0.999934	1.67462e-17	274.89	202.63	255.41	0.11868	UID158	CDK2
1124	A0A0C4DG33;O43933	1124;1181	A0A0C4DG33	A0A0C4DG33	Peroxisome biogenesis factor 1	PEX1	GKDQLFSQPPVLRTASQEGCQELTQEQRDQL		0.333551	0.638831	-0.132961	-1.02907	-0.77284	-0.548819	NaN	-0.659182	-0.810211	-0.752605	-0.329967	-0.976679	-0.599716	-0.325363	-0.647127	NaN	S	2	___1		Peroxisome biogenesis factor 1												14-3-3 domain binding motif;ATM kinase substrate motif;Calmodulin-dependent protein kinase II substrate motif;Calmodulin-dependent protein kinase IV substrate motif;Casein kinase II substrate motif;Chk1 kinase substrate motif;DNA dependent Protein kinase substrate motif;PKA kinase substrate motif;PKC kinase substrate motif	0.987031	0.000243971	97.836	76.205	97.836	-0.9244	UID159
140	F5GYV5;H7BZV4;A0A0C4DG62;F8WCT1;F5H7X4;Q66PJ3	140;130;129;140;260;332	F5GYV5	F5GYV5	ADP-ribosylation factor-like protein 6-interacting protein 4	ARL6IP4	QVEALPGPSLDQWHRSAGEEEDGPVLTDEQK	+	6.72462e-05	0.024	0.97752	6.5198	0.434006	0.229132	0.17798	0.357033	0.462238	0.634895	-0.785097	-0.907967	-0.080368	-0.401846	-0.499157	-0.895399	S	2	___1	SR-25	ADP-ribosylation factor-like protein 6-interacting protein 4					Phosphoserine					In isoform 5.;In isoform 6.		Casein kinase II substrate motif	1	3.78661e-52	315.16	281.86	254.18	-0.055909	UID161
13	H0Y594;H0Y7U4;A0A0C4DG98;Q8NI27;H7C477;B7ZBA0	13;185;1302;1417;153;6	H0Y594	H0Y594	THO complex subunit 2	THOC2	___XEQKRRKIDTHPSPSHSSTVKDSLIELK		0.712485	0.883372	0.0932554	0.381893	0.522276	0.323864	NaN	0.11092	NaN	0.66926	0.217842	0.824173	-0.134687	-0.111509	0.867889	0.21624	S	3	___1		THO complex subunit 2		Lys-rich			Phosphoserine							Casein kinase II substrate motif;DNA dependent Protein kinase substrate motif;ERK1,2 kinase substrate motif;G protein-coupled receptor kinase 1 substrate motif;GSK3 kinase substrate motif;GSK-3, ERK1, ERK2, CDK5 substrate motif;WW domain binding motif	0.99919	3.88926e-08	137.73	113.03	137.73	0.13183	UID164
112	H0Y594;H0Y7U4;A0A0C4DG98;Q8NI27;B7ZBA0;B7ZB98	112;311;1401;1516;105;9	H0Y594	H0Y594	THO complex subunit 2	THOC2	KEENGTMGVSKHKSESPCESPYPNEKDKEKN		0.273878	0.578156	0.182347	1.16523	-0.276051	-0.205872	-0.0469189	-0.130026	-0.420877	0.0765629	0.0486622	-0.0419331	-0.600744	-0.696215	-0.457489	NaN	S	2	___1		THO complex subunit 2		Lys-rich										Akt kinase substrate motif;b-Adrenergic Receptor kinase substrate motif;Casein kinase II substrate motif;ERK1,2 kinase substrate motif;G protein-coupled receptor kinase 1 substrate motif;GSK3 kinase substrate motif;GSK-3, ERK1, ERK2, CDK5 substrate motif;PKA kinase substrate motif;PKC kinase substrate motif;WW domain binding motif	0.999998	1.29607e-26	276.12	220.86	276.12	-2.2423	UID165
161	H0YN29;H0YL10;A0A0C4DGH0;Q5ZPR3	161;190;379;525	H0YN29	H0YN29	CD276 antigen	CD276	GEGSKTALQPLKHSDSKEDDGQEIA______		0.0550376	0.236568	-0.398209	-2.2445	0.306629	0.206059	NaN	NaN	0.906107	0.228352	0.537771	1.12687	0.890871	0.93013	0.840939	0.533388	S	2	___1		CD276 antigen					Phosphoserine					In isoform 3.	Cytoplasmic	b-Adrenergic Receptor kinase substrate motif;Casein kinase II substrate motif;PKA kinase substrate motif;Pyruvate dehydrogenase kinase substrate motif	0.999167	1.81063e-11	199.84	189.61	199.84	0.096002	UID169
66	H0YHL2;A0A0C4DGI9;J3KPG5;F8VU39;Q9UIF9	66;333;1367;1395;1397	H0YHL2	H0YHL2	Bromodomain adjacent to zinc finger domain protein 2A	BAZ2A	LAPKRRAGDPGEMPQSPTGLGQPKRRGRPPK		0.161562	0.425835	0.461808	1.52515	-1.05034	-1.20381	-1.35943	-1.24477	-0.879541	-0.223114	-0.67421	-1.73102	-1.25701	-2.2689	-1.34541	NaN	S	2	___1		Bromodomain adjacent to zinc finger domain protein 2A		Pro-rich			Phosphoserine							Casein kinase II substrate motif;ERK1,2 kinase substrate motif;GSK-3, ERK1, ERK2, CDK5 substrate motif;WW domain binding motif	0.89041	0.00304199	64.55	50.393	64.55	1.768	UID171
80	A0A0C4DGT1;Q13085	80;80	A0A0C4DGT1	A0A0C4DGT1	Acetyl-CoA carboxylase 1;Biotin carboxylase	ACACA	SSLQDGLALHIRSSMSGLHLVKQGRDRKKID		0.163415	0.427628	0.582331	1.58787	NaN	NaN	-2.35116	-1.79354	-1.00536	-1.1057	NaN	NaN	-2.1007	-2.01776	-1.79411	-2.67251	S	2	___1		Acetyl-CoA carboxylase 1					Phosphoserine							AMP-activated protein kinase substrate motif	0.994773	0.0147508	66.073	48.087	66.073	-0.51232	UID174	AMPKA1;AMPKA2
9	H7BXT7;E9PHY4;A0A0C4DH16;B8ZZS0;Q9NYM9	9;9;9;9;9	H7BXT7	H7BXT7	BET1-like protein	BET1L	_______MADWARAQSPGAVEEILDRENKRM		0.129575	0.387654	0.396203	1.66843	1.15497	1.01196	0.937992	1.22245	1.11128	1.25908	1.23856	1.15151	0.600826	NaN	0.801849	-0.192312	S	2	___1		BET1-like protein					Phosphoserine						Cytoplasmic	14-3-3 domain binding motif;Calmodulin-dependent protein kinase II substrate motif;ERK1,2 kinase substrate motif;GSK-3, ERK1, ERK2, CDK5 substrate motif;PKA kinase substrate motif;PKC kinase substrate motif;WW domain binding motif	1	1.96723e-15	220.59	190.42	157.58	0.33077	UID175
193	A0A0C4DH56;Q9BWT3	193;525	A0A0C4DH56	A0A0C4DH56	Poly(A) polymerase gamma	PAPOLG	SDVNRSSGGLQSKRLSLDSSCLDSSRDTDNG		0.880972	0.956875	0.0454865	0.154592	-0.7918	-0.463224	-1.24621	-1.24896	NaN	-0.667105	-0.390715	-0.435015	-1.66252	-1.32129	-0.835194	NaN	S	2	___1		Poly(A) polymerase gamma												Aurora-A kinase substrate motif;Casein kinase II substrate motif;G protein-coupled receptor kinase 1 substrate motif;GSK3 kinase substrate motif;MAPKAPK2 kinase substrate motif;PAK2 kinase substrate motif;Phosphorylase kinase substrate motif;PKA kinase substrate motif;PKC kinase substrate motif	0.999972	0.0204337	69.602	52.576	69.602	0.61676	UID177
234	Q5QPR4;J3QR29;A0A0D9SEI3;Q5QPR3;B7ZVY7;A0A0D9SER5;A0A0D9SEN2;J3QR44;Q9UQ88;P21127;J3KS35;E7ESP2	234;236;260;267;270;271;273;283;271;283;268;281	Q5QPR4	Q5QPR4	Cyclin-dependent kinase 11A;Cyclin-dependent kinase 11B	CDK11A;CDK11B;CDC2L1	EKMEERDLLSDLQDISDSERKTSSAESSSAE		0.246245	0.550557	0.827289	1.24024	-0.026659	0.215931	1.44645	1.23499	0.603903	0.735344	-2.79904	NaN	0.481466	0.742186	0.872395	0.074852	S	2	___1		Cyclin-dependent kinase 11A;Cyclin-dependent kinase 11B		Glu-rich								In isoform 3.;In isoform 4.;In isoform 7.;In isoform SV12.;In isoform SV7.		Casein kinase II substrate motif	0.985352	3.17732e-45	317.83	261.26	285.75	0.24785	UID179
540	Q5QPR4;J3QR29;A0A0D9SEI3;Q5QPR3;B7ZVY7;A0A0D9SER5;A0A0D9SEN2;J3QR44;Q9UQ88;P21127	540;542;566;573;576;577;579;589;577;589	Q5QPR4	Q5QPR4	Cyclin-dependent kinase 11A;Cyclin-dependent kinase 11B	CDK11A;CDK11B;CDC2L1	GILKVGDFGLAREYGSPLKAYTPVVVTQWYR		0.0812775	0.300705	0.351287	1.93854	-0.0833931	0.177277	-0.530003	0.168322	0.328983	0.32732	-0.417784	-0.021946	-0.288248	-0.178415	-0.00663567	-0.806189	S	2	___1	Pkinase	Cyclin-dependent kinase 11A;Cyclin-dependent kinase 11B				Protein kinase	Phosphoserine					In isoform SV12.;In isoform SV13.		Casein kinase I substrate motif;Cdc2 kinase substrate motif;CDK kinase substrate motif;CDK1,2,4,6 kinase substrate motif;ERK1,2 kinase substrate motif;G protein-coupled receptor kinase 1 substrate motif;GSK-3, ERK1, ERK2, CDK5 substrate motif;WW domain binding motif	1	0.000595514	125.82	57.92	125.82	0.66826	UID180
13	Q5QPR4;J3QR29;A0A0D9SEI3;Q5QPR3;B7ZVY7;A0A0D9SER5;A0A0D9SEN2;J3QR44;Q9UQ88;P21127;J3KS35;E7ESP2;E9PFJ2;A0A087WYI9;A0A087X1I0	13;13;47;47;47;47;47;47;47;47;47;47;47;47;47	Q5QPR4	Q5QPR4	Cyclin-dependent kinase 11A;Cyclin-dependent kinase 11B	CDK11A;CDK11B;CDC2L1	___MSQSDDRDSKRDSLEEGELRDHCMEITI		0.071903	0.275025	0.33151	2.01226	0.683163	0.543892	0.709888	0.682068	1.14453	1.26072	0.497143	0.549976	0.15411	0.767672	0.845072	0.221228	S	2	___1		Cyclin-dependent kinase 11A;Cyclin-dependent kinase 11B		Glu-rich								In isoform 3.;In isoform 4.;In isoform 7.;In isoform SV11.;In isoform SV12.;In isoform SV13.;In isoform SV4.;In isoform SV7.		Aurora-A kinase substrate motif;b-Adrenergic Receptor kinase substrate motif;Casein kinase II substrate motif;MAPKAPK2 kinase substrate motif;PAK2 kinase substrate motif;Phosphorylase kinase substrate motif;PKA kinase substrate motif;PKC kinase substrate motif	1	2.21837e-05	154.6	87.139	121.18	-0.054127	UID182
871	E7EXA6;A0A0D9SF58;Q8WVB6	871;1080;871	E7EXA6	E7EXA6	Chromosome transmission fidelity protein 18 homolog	CHTF18	AEASARVENSPQVDGSPPGLEGLLGGIGEKG		0.360625	0.670208	-0.442639	-0.978066	-3.22692	NaN	-1.96346	-3.28364	NaN	-2.21667	-2.90354	NaN	-2.16427	-2.71816	-1.18312	-2.18107	S	3	___1		Chromosome transmission fidelity protein 18 homolog					Phosphoserine							ERK1,2 kinase substrate motif;GSK-3, ERK1, ERK2, CDK5 substrate motif;WW domain binding motif	0.999494	1.74933e-05	92.632	78.617	92.632	-0.12774	UID183
337	A0A0D9SF60;Q99569	337;337	A0A0D9SF60	A0A0D9SF60	Plakophilin-4	PKP4	QTRVASPSQGQVGSSSPKRSGMTAVPQHLGP	+	0.000774374	0.04	-0.494713	-4.96577	-0.401384	-0.164263	-0.182062	0.124771	-0.209448	-0.409788	0.318718	0.46315	0.162962	0.274446	0.219143	NaN	S	2	___1		Plakophilin-4					Phosphoserine							Cdc2 kinase substrate motif;CDK kinase substrate motif;CDK1,2,4,6 kinase substrate motif;ERK1,2 kinase substrate motif;G protein-coupled receptor kinase 1 substrate motif;Growth associated histone HI kinase substrate motif;GSK3 kinase substrate motif;GSK-3, ERK1, ERK2, CDK5 substrate motif;MDC1 BRCT domain binding motif;PKA kinase substrate motif;PKC kinase substrate motif;Plk1 PBD domain binding…	0.784266	1.3114e-12	155.26	106.97	100.55	0.88571	UID184
314	A0A0D9SF60;Q99569	314;314	A0A0D9SF60	A0A0D9SF60	Plakophilin-4	PKP4	PNGPTPQYQTTARVGSPLTLTDAQTRVASPS		0.430213	0.72898	-0.214315	-0.830742	NaN	-1.23678	-1.52682	-0.959753	-0.511271	-0.473776	-0.447969	-0.770536	-1.14564	-0.972229	-0.300446	NaN	S	2	___1		Plakophilin-4					Phosphoserine							14-3-3 domain binding motif;Calmodulin-dependent protein kinase II substrate motif;Casein kinase II substrate motif;ERK1,2 kinase substrate motif;GSK-3, ERK1, ERK2, CDK5 substrate motif;PKA kinase substrate motif;PKC kinase substrate motif;WW domain binding motif	0.999999	2.01323e-05	124.51	89.508	118.52	0.17704	UID185
156	Q5JRC6;A0A0D9SGE8	156;156	Q5JRC6	Q5JRC6		PHF6	ADLEESFNEHELEPSSPKSKKKSRKGRPRKT		0.526442	0.792719	-0.17612	-0.658924	2.66784	2.90189	2.05016	1.86545	1.50376	2.21866	2.81335	NaN	2.19133	2.34831	2.56088	1.9732	S	3	___1														Casein kinase I substrate motif;Casein kinase II substrate motif;ERK1,2 kinase substrate motif;Growth associated histone HI kinase substrate motif;GSK-3, ERK1, ERK2, CDK5 substrate motif;MDC1 BRCT domain binding motif;PKA kinase substrate motif;PKC kinase substrate motif;Plk1 PBD domain binding motif;WW domain binding motif	0.952913	6.44e-63	279.62	265.67	171.19	-0.90554	UID186
632	A0A0G2JIW1;P0DMV9;P0DMV8;V9GZ37	632;631;631;466	A0A0G2JIW1	A0A0G2JIW1	Heat shock 70 kDa protein 1B;Heat shock 70 kDa protein 1A	HSPA1B;HSPA1A	GPGPGGFGAQGPKGGSGSGPTIEEVD_____	+	0.00142107	0.0391515	0.970505	4.76313	-1.33261	-1.58376	-0.757097	-0.688719	-0.915735	NaN	-2.10394	-2.30147	-1.7589	-1.79025	-2.1759	NaN	S	2	___1		Heat shock 70 kDa protein 1A;Heat shock 70 kDa protein 1B					Phosphoserine							Casein kinase II substrate motif;G protein-coupled receptor kinase 1 substrate motif;PKA kinase substrate motif;PKC kinase substrate motif	0.785543	0.0114173	60.49	47.436	60.49	-2.0133	UID187
304	H0Y6K2;A0A140T9E9;A0A0G2JK44;P25440;H0YDJ7;U3KPW0;E9PIQ3;U3KQA6;A0A0G2JHL0;A0A140T9F7;A0A140T9V2	304;304;298;298;21;41;298;298;298;304;298	H0Y6K2	H0Y6K2	Bromodomain-containing protein 2	BRD2	ADTTTPTPTAILAPGSPASPPGSLEPKAARL		0.0231068	0.160023	-0.563765	-2.80255	-0.121899	0.174637	NaN	-0.577497	0.13035	0.136648	0.825773	0.793161	0.0739861	0.318802	0.549341	NaN	S	3	___1		Bromodomain-containing protein 2					Phosphoserine							Casein kinase II substrate motif;ERK1,2 kinase substrate motif;G protein-coupled receptor kinase 1 substrate motif;GSK-3, ERK1, ERK2, CDK5 substrate motif;WW domain binding motif	0.997509	1.18943e-06	92.904	78.85	89.197	1.9547	UID188
483	H7C5U4;H0YCV8;A0A0G2JNU3;A6H8Y1	483;249;2227;2227	H7C5U4	H7C5U4	Transcription factor TFIIIB component B'' homolog	BDP1	TGPCTLGLDRGLGENSVEEPQIKDSKGDSVL		0.419558	0.72079	-0.0950517	-0.845846	-0.133944	-0.097538	-0.234743	-0.0612831	-0.0630989	0.191212	-0.311026	0.0330276	0.125048	0.316002	-0.0206223	NaN	S	2	___1		Transcription factor TFIIIB component B'' homolog										In isoform 3| isoform 5.;In isoform 4.		Casein kinase II substrate motif;G protein-coupled receptor kinase 1 substrate motif;Plk1 kinase substrate motif	1	0.0145287	58.172	26.164	58.172	-0.10033	UID191
1486	A0A0G2JNZ2;Q14160;A0A0G2JMS7;A0A0G2JPP5;H0YCG0	1486;1486;1405;1486;506	A0A0G2JNZ2	A0A0G2JNZ2	Protein scribble homolog	SCRIB	LRVQSPEPPAPERALSPAELRALEAEKRALW		0.467296	0.751962	0.160726	0.758945	-1.61985	-1.59655	-2.44191	-1.94653	-1.63304	-1.33447	-1.5557	-1.8153	-2.05278	-2.35484	-1.8353	NaN	S	2	___1		Protein scribble homolog					Phosphoserine							14-3-3 domain binding motif;Calmodulin-dependent protein kinase II substrate motif;Casein kinase II substrate motif;ERK1,2 kinase substrate motif;GSK-3, ERK1, ERK2, CDK5 substrate motif;PKA kinase substrate motif;PKC kinase substrate motif;WW domain binding motif	1	0.0139648	63.076	29.718	63.076	-0.26041	UID193
853	A0A0G2JNZ2;Q14160;A0A0G2JMS7;A0A0G2JPP5	853;853;772;853	A0A0G2JNZ2	A0A0G2JNZ2	Protein scribble homolog	SCRIB	ERRGGGLRLPLLPPESPGPLRQRHVACLARS		0.133464	0.392478	0.299312	1.64941	-1.13558	-1.50654	-2.08727	-1.91133	-1.97525	-1.57282	-1.83257	-1.76346	-2.24125	-1.99643	-2.1535	NaN	S	2	___1		Protein scribble homolog					Phosphoserine		Interaction with ARHGEF7					b-Adrenergic Receptor kinase substrate motif;ERK1,2 kinase substrate motif;GSK-3, ERK1, ERK2, CDK5 substrate motif;WW domain binding motif	1	0.00836333	67.563	18.767	60.49	0.45471	UID194
1566	A0A0G2JNZ2;Q14160;A0A0G2JMS7;H0YCG0	1566;1566;1485;586	A0A0G2JNZ2	A0A0G2JNZ2	Protein scribble homolog	SCRIB	VEDLGPQTSTSPGRLSPDFAEELRSLEPSPS		0.737026	0.890897	0.100256	0.345295	0.113256	0.356245	0.220116	0.320168	0.431164	0.24474	0.92853	0.585499	0.200544	0.0314236	0.442665	-1.10451	S	2	___1		Protein scribble homolog					Phosphoserine							ERK1,2 kinase substrate motif;G protein-coupled receptor kinase 1 substrate motif;GSK-3, ERK1, ERK2, CDK5 substrate motif;PKA kinase substrate motif;PKC kinase substrate motif;WW domain binding motif	1	8.05385e-06	178.67	135.01	44.564	-0.2142	UID195
1309	A0A0G2JNZ2;Q14160;A0A0G2JMS7;A0A0G2JPP5;H0YCG0	1309;1309;1228;1309;305	A0A0G2JNZ2	A0A0G2JNZ2	Protein scribble homolog	SCRIB	ESPCSPSGQQPPSPPSPDELPANVKQAYRAF		0.0451372	0.218587	-0.390962	-2.52246	0.0710869	NaN	0.298445	NaN	0.537191	0.145699	NaN	0.355513	0.856607	0.587013	0.817137	NaN	S	3	___1		Protein scribble homolog		Pro-rich			Phosphoserine							Casein kinase II substrate motif;DNA dependent Protein kinase substrate motif;ERK1,2 kinase substrate motif;GSK-3, ERK1, ERK2, CDK5 substrate motif;WW domain binding motif	0.999572	1.38141e-06	95.123	85.536	91.416	-1.1033	UID197
835	A0A0G2JNZ2;Q14160;A0A0G2JMS7;A0A0G2JPP5;H0YDF9	835;835;754;835;132	A0A0G2JNZ2	A0A0G2JNZ2	Protein scribble homolog	SCRIB	ENAVTITPLRPEDDYSPRERRGGGLRLPLLP		0.0698707	0.270179	0.432286	2.02943	2.7273	2.88719	2.22454	2.28241	2.47588	2.51184	2.22585	2.50288	2.1573	2.20581	2.23372	1.18988	S	3	___1		Protein scribble homolog					Phosphoserine		Interaction with ARHGEF7					Casein kinase I substrate motif;Casein kinase II substrate motif;ERK1,2 kinase substrate motif;Growth associated histone HI kinase substrate motif;GSK-3, ERK1, ERK2, CDK5 substrate motif;PKA kinase substrate motif;PKC kinase substrate motif;WW domain binding motif	0.999999	1.33872e-19	183.47	167.95	183.47	0.92768	UID198
1220	A0A0G2JNZ2;Q14160;A0A0G2JMS7;A0A0G2JPP5;H0YCG0	1220;1220;1139;1220;216	A0A0G2JNZ2	A0A0G2JNZ2	Protein scribble homolog	SCRIB	GVIANPFAAGIGHRNSLESISSIDRELSPEG		0.492868	0.771252	-0.216814	-0.718549	0.835695	0.843649	0.601437	NaN	1.09348	1.3625	1.67853	1.43122	1.08425	NaN	1.48273	0.144081	S	2	___1		Protein scribble homolog					Phosphoserine		Interaction with ARHGEF7					AMP-activated protein kinase substrate motif;Casein kinase II substrate motif;PKA kinase substrate motif;PKC kinase substrate motif	0.999997	7.03173e-09	211.77	184.89	177.36	1.0418	UID199
1448	A0A0G2JNZ2;Q14160;A0A0G2JMS7;A0A0G2JPP5;H0YCG0	1448;1448;1367;1448;468	A0A0G2JNZ2	A0A0G2JNZ2	Protein scribble homolog	SCRIB	PPWASPSPTSRQSPASPPPLGGGAPVRTAKA		0.975761	0.990113	0.00796318	0.0311519	1.08883	1.15963	0.301491	0.644218	0.946926	1.22408	1.44034	1.22854	0.554445	0.823391	1.21086	0.059824	S	2	___1		Protein scribble homolog					Phosphoserine							ERK1,2 kinase substrate motif;GSK-3, ERK1, ERK2, CDK5 substrate motif;WW domain binding motif	1	3.09578e-22	226.7	179.51	180.27	1.5078	UID201
504	A0A0G2JNZ2;Q14160;A0A0G2JMS7;A0A0G2JPP5	504;504;423;504	A0A0G2JNZ2	A0A0G2JNZ2	Protein scribble homolog	SCRIB	EGRRSEACPCQPDSGSPLPAEEEKRLSAESG		0.312068	0.61921	-0.232492	-1.07096	0.904383	1.20835	0.0605354	0.391352	0.560982	0.432137	1.24124	0.986322	0.575626	0.749981	0.574076	NaN	S	3	___1		Protein scribble homolog					Phosphoserine		Sufficient for targeting to adherens junction and to inhibit cell proliferation					Casein kinase I substrate motif;ERK1,2 kinase substrate motif;G protein-coupled receptor kinase 1 substrate motif;GSK-3, ERK1, ERK2, CDK5 substrate motif;WW domain binding motif	0.900137	6.69657e-05	84.214	67.413	84.214	0.17484	UID202
1378	A0A0G2JNZ2;Q14160;A0A0G2JMS7;A0A0G2JPP5;H0YCG0	1378;1378;1297;1378;374	A0A0G2JNZ2	A0A0G2JNZ2	Protein scribble homolog	SCRIB	LEVRVPQAEGPPKRVSLVGADDLRKMQEEEA		0.557647	0.809495	0.164544	0.606582	-0.814783	-1.06038	-1.79915	-1.70279	-1.06716	-0.892172	-0.970198	-0.905762	-2.1648	-1.87731	-1.19888	-1.20675	S	2	___1		Protein scribble homolog					Phosphoserine							Aurora-A kinase substrate motif;G protein-coupled receptor kinase 1 substrate motif;PAK2 kinase substrate motif;Phosphorylase kinase substrate motif;PKA kinase substrate motif;PKC kinase substrate motif	1	0.000363564	115.68	58.507	115.68	0.14728	UID203	ROCK1
37	A0A0G2JNZ2;Q14160;A0A0G2JPP5;Q5T0G3;Q9BTT6	37;37;37;37;37	A0A0G2JNZ2	A0A0G2JNZ2	Protein scribble homolog;Leucine-rich repeat-containing protein 1	SCRIB;LRRC1	CSLQAVPEEIYRYSRSLEELLLDANQLRELP		0.569913	0.818774	-0.126446	-0.592448	-3.29189	NaN	-3.33565	-3.42021	-2.76423	-2.86201	-2.80836	NaN	-3.26559	-3.46948	-2.52593	-2.97242	S	2	___1	LRR_8	Leucine-rich repeat-containing protein 1;Protein scribble homolog							Sufficient for targeting to adherens junction and to inhibit cell proliferation			In isoform 2.		Casein kinase II substrate motif	1	0.00122394	90.926	76.507	90.926	1.3324	UID204
1475	A0A0G2JNZ2;Q14160;A0A0G2JMS7;A0A0G2JPP5;H0YCG0	1475;1475;1394;1475;495	A0A0G2JNZ2	A0A0G2JNZ2	Protein scribble homolog	SCRIB	TAKAERRHQERLRVQSPEPPAPERALSPAEL		0.195389	0.47834	0.268445	1.39876	0.516432	0.818186	NaN	0.649017	0.443859	0.873669	0.807367	0.841368	0.201035	0.115788	0.50816	-0.122992	S	2	___1		Protein scribble homolog					Phosphoserine							14-3-3 domain binding motif;Akt kinase substrate motif;Calmodulin-dependent protein kinase II substrate motif;Casein kinase II substrate motif;ERK1,2 kinase substrate motif;G protein-coupled receptor kinase 1 substrate motif;GSK-3, ERK1, ERK2, CDK5 substrate motif;MAPKAPK1 kinase substrate motif;PKA kinase substrate motif;PKC kinase substrate motif;WW domain binding motif	1	1.62613e-07	179.93	136.16	103.11	0.091691	UID205
118	A0A0J9YVR0;Q8IZ21	126;118	A0A0J9YVR0;Q8IZ21	Q8IZ21	Phosphatase and actin regulator 4	PHACTR4	LKNGHTTPIGNARSSSPVQVEEEPVRLASLR		0.461331	0.745055	-0.169974	-0.766076	1.9216	1.73717	1.5445	1.04963	2.04806	1.96614	2.58418	1.94423	1.39968	1.82411	1.88742	1.64733	S	2	___1		Phosphatase and actin regulator 4					Phosphoserine					In isoform 4.		14-3-3 domain binding motif;Calmodulin-dependent protein kinase II substrate motif;ERK1,2 kinase substrate motif;GSK-3, ERK1, ERK2, CDK5 substrate motif;MAPKAPK2 kinase substrate motif;MDC1 BRCT domain binding motif;PKA kinase substrate motif;PKC kinase substrate motif;Plk1 PBD domain binding motif;WW domain binding motif	0.999017	1.48164e-15	225.13	194.05	225.13	-0.29001	UID206
1360	A0A0J9YX88;E9PJ24;B7ZM65;F8WEF5;A0A0J9YYB5;A0A0J9YWD5;Q9P1Y6	1360;1356;1356;1358;1358;1359;1360	A0A0J9YX88	A0A0J9YX88	PHD and RING finger domain-containing protein 1	PHRF1	HLLRPDAAEKAEAPSSPDVAPAGKEDSPSAS		0.391864	0.697438	0.169875	0.894914	0.157633	-0.328712	-0.183287	-0.409996	0.34523	0.334688	0.413521	-0.1266	-0.489944	-0.388466	-0.184519	-0.327686	S	2	___1		PHD and RING finger domain-containing protein 1					Phosphoserine							ERK1,2 kinase substrate motif;G protein-coupled receptor kinase 1 substrate motif;GSK-3, ERK1, ERK2, CDK5 substrate motif;MDC1 BRCT domain binding motif;Plk1 PBD domain binding motif;WW domain binding motif	0.969994	3.69272e-12	162.94	125.6	142.45	4.5564	UID207
1202	A0A0J9YX88;E9PJ24;B7ZM65;F8WEF5;A0A0J9YYB5;A0A0J9YWD5;Q9P1Y6	1202;1198;1198;1200;1200;1201;1202	A0A0J9YX88	A0A0J9YX88	PHD and RING finger domain-containing protein 1	PHRF1	TRSHSPERKGAVREASPAPLAQGEPGREDLP		0.444501	0.736172	0.149287	0.796029	-0.131119	-0.305605	-0.116634	-0.163988	-0.0346756	0.0469074	0.479721	0.0462112	-0.44022	-0.672544	-0.411741	-0.602264	S	2	___1		PHD and RING finger domain-containing protein 1					Phosphoserine							14-3-3 domain binding motif;AMP-activated protein kinase substrate motif;Calmodulin-dependent protein kinase II substrate motif;ERK1,2 kinase substrate motif;GSK-3, ERK1, ERK2, CDK5 substrate motif;HMGCoA Reductase kinase substrate motif;PKA kinase substrate motif;PKC epsilon kinase substrate motif;PKC kinase substrate motif;WW domain binding motif	1	1.80058e-12	172.3	158.53	148.62	-2.0196	UID208
1124	A0A0J9YX88;E9PJ24;B7ZM65;F8WEF5;A0A0J9YYB5;A0A0J9YWD5;Q9P1Y6	1124;1120;1120;1122;1122;1123;1124	A0A0J9YX88	A0A0J9YX88	PHD and RING finger domain-containing protein 1	PHRF1	KKKRRSASRPRGRECSPTSSLERLCRHKHQR		0.781289	0.912593	-0.0312246	-0.28523	-0.322018	-0.378868	-0.663603	-0.554611	-0.312496	-0.280552	-0.0880966	-0.261007	-0.637424	-0.358957	-0.331572	-0.647743	S	2	___1		PHD and RING finger domain-containing protein 1		Arg-rich										14-3-3 domain binding motif;Akt kinase substrate motif;Calmodulin-dependent protein kinase II substrate motif;Casein kinase II substrate motif;ERK1,2 kinase substrate motif;G protein-coupled receptor kinase 1 substrate motif;GSK3 kinase substrate motif;GSK-3, ERK1, ERK2, CDK5 substrate motif;MAPKAPK1 kinase substrate motif;PKA kinase substrate motif;PKC epsilon kinase substrate motif;PKC kinase s…	0.999978	8.92063e-06	143.24	109.44	143.24	-0.85634	UID209
915	A0A0J9YX88;E9PJ24;B7ZM65;F8WEF5;A0A0J9YYB5;A0A0J9YWD5;Q9P1Y6	915;911;911;913;913;914;915	A0A0J9YX88	A0A0J9YX88	PHD and RING finger domain-containing protein 1	PHRF1	SAMSKLRGAVAAEGASDTEREEPTESQGLAA		0.0159925	0.139059	0.716274	2.95873	2.08403	2.07759	NaN	1.77726	1.41267	2.2129	1.58132	1.66317	0.826963	1.11207	1.46456	0.531612	S	3	___1		PHD and RING finger domain-containing protein 1					Phosphoserine							Casein kinase I substrate motif;Casein kinase II substrate motif	0.975879	3.72267e-14	162.1	151.34	128.43	-0.33002	UID210
867	A0A0J9YX88;E9PJ24;B7ZM65;F8WEF5;A0A0J9YYB5;A0A0J9YWD5;Q9P1Y6	867;863;863;865;865;866;867	A0A0J9YX88	A0A0J9YX88	PHD and RING finger domain-containing protein 1	PHRF1	PGLLPSEITRTISINSPKAQTVQAVRCVTSY		0.404646	0.704529	0.166576	0.874367	-1.66567	-1.81969	-2.18983	-2.31194	-2.01316	-2.04805	-1.78514	-1.75393	-2.43838	NaN	-2.62616	-2.26956	S	2	___1		PHD and RING finger domain-containing protein 1					Phosphoserine							ERK1,2 kinase substrate motif;Growth associated histone HI kinase substrate motif;GSK-3, ERK1, ERK2, CDK5 substrate motif;PKA kinase substrate motif;PKC kinase substrate motif;WW domain binding motif	0.992818	0.0120435	66.595	30.262	66.595	-0.23446	UID211
206	A0A0R4J2E8;A8MXP9;P43243;D6REM6;D6R991	206;206;206;206;206	A0A0R4J2E8	A0A0R4J2E8	Matrin-3	MATR3	DRGPSLNPVLDYDHGSRSQESGYYDRMDYED		0.807349	0.923333	-0.045934	-0.251136	-0.423101	-0.38545	-0.383682	-0.571764	-0.685888	-0.129871	0.112909	-0.359489	-0.469082	-0.983881	-0.220585	NaN	S	2	___1		Matrin-3					Phosphoserine					In isoform 2.		Casein kinase I substrate motif;Casein kinase II substrate motif	0.999998	4.5893e-18	193.64	170.76	193.64	0.63046	UID214
37	A0A0U1RQJ8;Q8WXE1;A0A0U1RRM7;A0A0U1RQW3	37;224;131;224	A0A0U1RQJ8	A0A0U1RQJ8	ATR-interacting protein	ATRIP	SERANKLAAPSVSHVSPRKNPSVVIKPEACS		0.955803	0.987994	-0.0128279	-0.0568268	0.428219	0.618763	0.253494	0.1007	0.527752	0.762703	1.08536	1.02323	-0.129799	0.235081	0.453236	0.101496	S	2	___1		ATR-interacting protein					Phosphoserine							Cdc2 kinase substrate motif;CDK kinase substrate motif;CDK1,2,4,6 kinase substrate motif;ERK1,2 kinase substrate motif;Growth associated histone HI kinase substrate motif;GSK-3, ERK1, ERK2, CDK5 substrate motif;PKA kinase substrate motif;PKC kinase substrate motif;WW domain binding motif	0.999988	9.94327e-09	188.13	149.35	174.95	0.8419	UID218	CDK2
331	A0A0U1RQJ8;Q8WXE1	331;518	A0A0U1RQJ8	A0A0U1RQJ8	ATR-interacting protein	ATRIP	DSAAGEGNRSLVHRLSDGDMTSALRGVADDQ		0.0266706	0.165949	0.609233	2.91887	NaN	NaN	-0.465834	-0.185436	0.0139675	0.30835	NaN	NaN	-1.04971	-0.561171	-0.451254	-0.703747	S	2	___1		ATR-interacting protein					Phosphoserine							AMP-activated protein kinase substrate motif;Casein kinase II substrate motif;HMGCoA Reductase kinase substrate motif;PKA kinase substrate motif;PKC kinase substrate motif;Pyruvate dehydrogenase kinase substrate motif	0.999972	0.00552557	71.176	50.846	71.176	0.84801	UID219
470	A0A0U1RRM1;Q8WXI9;A0A0U1RR30	470;486;238	A0A0U1RRM1	A0A0U1RRM1	Transcriptional repressor p66-beta	GATAD2B	QEQEIEQRLQQQAALSPTTAPAVSSVSKQET		0.460331	0.743902	-0.19709	-0.775537	NaN	-0.581034	-0.856422	-0.896738	NaN	-0.293238	0.272968	-0.203381	-0.728136	-0.734285	-0.404413	-0.961359	S	2	___1		Transcriptional repressor p66-beta					Phosphoserine							Casein kinase II substrate motif;ERK1,2 kinase substrate motif;G protein-coupled receptor kinase 1 substrate motif;GSK-3, ERK1, ERK2, CDK5 substrate motif;WW domain binding motif	0.990185	5.8842e-19	178.72	154.65	178.72	-0.60415	UID223
46	A2AB15;A0A140T947;O60231	46;106;106	A2AB15	A2AB15	Putative pre-mRNA-splicing factor ATP-dependent RNA helicase DHX16	DHX16	LEKNRSYRLLEDSEESSEETVSRAGSSLQKK		0.0800509	0.298052	0.284674	2.00374	0.803247	1.01675	0.54311	0.634962	0.557922	1.00315	NaN	0.73398	0.202459	0.393658	0.570637	NaN	S	2	___1		Putative pre-mRNA-splicing factor ATP-dependent RNA helicase DHX16					Phosphoserine							b-Adrenergic Receptor kinase substrate motif;Casein kinase II substrate motif;G protein-coupled receptor kinase 1 substrate motif	0.995866	1.99651e-63	337.86	247.25	300.3	-0.85282	UID226
100	A2AB15;A0A140T947;O60231	100;160;160	A2AB15	A2AB15	Putative pre-mRNA-splicing factor ATP-dependent RNA helicase DHX16	DHX16	KKKTGGSKQQTEKPESEDEWERTERERLQDL		0.51372	0.779162	-0.15293	-0.683294	0.799141	0.873964	0.342728	NaN	0.706429	0.051157	NaN	0.862246	0.894157	0.367853	1.12194	0.291872	S	2	___1		Putative pre-mRNA-splicing factor ATP-dependent RNA helicase DHX16					Phosphoserine							b-Adrenergic Receptor kinase substrate motif;BARD1 BRCT domain binding motif;Casein kinase II substrate motif;G protein-coupled receptor kinase 1 substrate motif;PKA kinase substrate motif;PKC kinase substrate motif	1	2.95051e-27	264.85	247.05	264.85	-0.086978	UID227
866	A0A1B0GTL5	866	A0A1B0GTL5	A0A1B0GTL5			FRGESDEPAPQVQPESPETVSPKGSEGLPPP		0.547161	0.809549	-0.0733997	-0.625522	-0.796143	-0.946423	-1.2023	-0.696024	-0.839172	-0.814785	-0.505131	-0.667789	-1.0071	-0.912661	-0.952694	NaN	S	3	___1														b-Adrenergic Receptor kinase substrate motif;Casein kinase II substrate motif;ERK1,2 kinase substrate motif;GSK-3, ERK1, ERK2, CDK5 substrate motif;WW domain binding motif	0.964405	0.000170666	78.202	73.677	78.202	0.62449	UID230
273	A0A1P0AZG4;A0A1B0GUH9	273;555	A0A1P0AZG4	A0A1P0AZG4			PSKEITSHEEGGGDVSPRKEPQEPEVCPTKI		0.925421	0.974869	0.0289062	0.0959953	-0.740191	-1.22865	-1.14861	-0.830482	-1.70088	-0.719749	-0.24966	-0.679335	-1.10682	-2.06075	-0.949036	-1.4964	S	2	___1														Cdc2 kinase substrate motif;CDK kinase substrate motif;CDK1,2,4,6 kinase substrate motif;ERK1,2 kinase substrate motif;Growth associated histone HI kinase substrate motif;GSK-3, ERK1, ERK2, CDK5 substrate motif;PKA kinase substrate motif;PKC kinase substrate motif;WW domain binding motif	1	3.49352e-08	128.96	96.687	128.96	0.097002	UID231
797	A0A1B0GUI1;Q6GYQ0	797;797	A0A1B0GUI1	A0A1B0GUI1	Ral GTPase-activating protein subunit alpha-1	RALGAPA1	VFGALNEEQPLPRSSSTSDILEPFTVERAKG		0.617728	0.832628	0.096497	0.51912	-1.40019	-1.29921	-0.714008	NaN	-1.04203	-0.557247	-1.30279	-1.25068	-1.17199	-0.896164	-0.873556	NaN	S	2	___1		Ral GTPase-activating protein subunit alpha-1					Phosphoserine							14-3-3 domain binding motif;Calmodulin-dependent protein kinase I substrate motif;Calmodulin-dependent protein kinase II substrate motif;Calmodulin-dependent protein kinase IV substrate motif;Casein kinase II substrate motif;Chk1 kinase substrate motif;MDC1 BRCT domain binding motif;PKA kinase substrate motif;PKC kinase substrate motif;Plk1 PBD domain binding motif;Pyruvate dehydrogenase kinase s…	0.771992	0.000365088	93.823	70.218	93.823	1.3672	UID235
721	A0A1B0GUZ7;Q14156	721;694	A0A1B0GUZ7	A0A1B0GUZ7	Protein EFR3 homolog A	EFR3A	LSVPYVPQVTDEDRLSRRKSIVDTVSIQVDI		0.118553	0.37287	-0.437616	-1.72532	-1.66783	-1.71206	-1.34528	-0.817072	-0.889265	-0.771343	-0.931463	-1.02837	-0.978228	-0.821398	-0.0548439	NaN	S	3	___1		Protein EFR3 homolog A					Phosphoserine							Casein kinase I substrate motif;G protein-coupled receptor kinase 1 substrate motif;GSK3 kinase substrate motif;PKA kinase substrate motif;PKC kinase substrate motif	0.992727	4.26513e-06	109.05	88.157	104.41	1.3461	UID236
727	A0A1B0GVY1;Q96PU5	727;448	A0A1B0GVY1	A0A1B0GVY1	E3 ubiquitin-protein ligase NEDD4-like	NEDD4L	NNHLIEPQIRRPRSLSSPTVTLSAPLEGAKD		0.781465	0.912227	-0.0507726	-0.288302	NaN	NaN	-1.13343	-0.772345	-0.403828	-0.581579	-0.450573	-0.448545	-0.81616	-0.933525	-0.711313	NaN	S	2	___1		E3 ubiquitin-protein ligase NEDD4-like					Phosphoserine| by PKA and SGK1	Abolishes interaction with 1433F				In isoform 3.		14-3-3 domain binding motif;Akt kinase substrate motif;Calmodulin-dependent protein kinase II substrate motif;Casein kinase II substrate motif;MAPKAPK1 kinase substrate motif;PKA kinase substrate motif;PKC kinase substrate motif	0.86945	2.9907e-13	159.22	137.22	129.38	2.1466	UID238	PKACA;SGK1
118	E9PEN0;A0A1B0GW41;Q8WYH8	118;120;118	E9PEN0	E9PEN0	Inhibitor of growth protein 5	ING5	DLARFEADLKDKMEGSDFESSGGRGLKSKSV		0.110856	0.357821	-0.566545	-1.74902	-2.0435	-2.7063	-2.59048	-2.94213	-3.12897	-3.86629	-1.47347	-2.44421	-2.21273	-2.91795	-2.11791	-2.71212	S	2	___1		Inhibitor of growth protein 5					Phosphoserine							Casein kinase II substrate motif;G protein-coupled receptor kinase 1 substrate motif;GSK3 kinase substrate motif;PKA kinase substrate motif	0.999492	0.00730141	73.848	61.321	62.924	-0.50543	UID239
159	E7EUF7;A0A1C7CYY3;Q9H902	159;152;152	E7EUF7	E7EUF7	Receptor expression-enhancing protein;Receptor expression-enhancing protein 1	REEP1	ASKGQGALSERLRSFSMQDLTTIRGDGAPAP		0.0956824	0.330863	0.304139	1.86086	-1.31351	-1.13405	-1.84862	-1.38058	-1.42048	-1.23747	-1.49361	-1.42787	-2.1812	-1.70496	-1.65864	NaN	S	2	___1		Receptor expression-enhancing protein 1					Phosphoserine					In isoform 4.		14-3-3 domain binding motif;Akt kinase substrate motif;AMP-activated protein kinase substrate motif;Calmodulin-dependent protein kinase II substrate motif;Casein kinase II substrate motif;HMGCoA Reductase kinase substrate motif;MAPKAPK1 kinase substrate motif;p70 Ribosomal S6 kinase substrate motif;PKA kinase substrate motif;PKC kinase substrate motif;Pyruvate dehydrogenase kinase substrate motif	0.995065	0.00842471	77.677	62.138	77.677	-0.53596	UID240
100	E5RIS7;A0A1W2PRL9;A0A1W2PPZ5;P23193	100;79;100;100	E5RIS7	E5RIS7	Transcription elongation factor A protein 1	TCEA1	DLDEKKKEPAITSQNSPEAREERYFTV____		0.97117	0.989089	0.00629361	0.037055	0.83168	1.06524	1.19257	1.23554	1.2834	1.34073	1.56609	1.37799	1.40826	0.974998	1.03214	0.551916	S	2	___1		Transcription elongation factor A protein 1					Phosphoserine							Casein kinase II substrate motif;ERK1,2 kinase substrate motif;GSK-3, ERK1, ERK2, CDK5 substrate motif;WW domain binding motif	1	1.86355e-55	331.48	303.65	331.48	-2.0897	UID242
125	H7C5C6;H7C5K2;H7C5A5;A0A1X7SBY3;H0Y860;A0A1W2PRA1;Q9P246	125;231;523;523;531;531;523	H7C5C6	H7C5C6	Stromal interaction molecule 2	STIM2	RSSSLCRSRRSIVPSSPQPQRAQLAPHAPHP		0.953527	0.986665	-0.0138245	-0.0597567	-1.42122	-1.95149	-1.54459	-2.09908	-1.02127	-1.48215	-0.796192	-1.84751	-1.84443	-1.88074	-1.53246	-1.53551	S	2	___1		Stromal interaction molecule 2					Phosphoserine						Cytoplasmic	ERK1,2 kinase substrate motif;GSK-3, ERK1, ERK2, CDK5 substrate motif;MDC1 BRCT domain binding motif;Plk1 PBD domain binding motif;WW domain binding motif	0.792737	0.0102308	64.55	43.044	64.55	1.0329	UID245
29	J3QLT3;E7ENF8;A0A1W2PRI7;Q15311	29;29;29;29	J3QLT3	J3QLT3	RalA-binding protein 1	RALBP1	EHRRVEHGSGLTRTPSSEEISPTKFPGLYRT		0.741151	0.892749	-0.0709796	-0.340695	NaN	-0.507504	-1.11108	-0.481474	-0.539537	-0.52997	-0.498381	0.0626545	-0.672361	-0.506533	-0.594143	-1.16883	S	2	___1		RalA-binding protein 1					Phosphoserine							14-3-3 domain binding motif;Calmodulin-dependent protein kinase I substrate motif;Calmodulin-dependent protein kinase II substrate motif;Calmodulin-dependent protein kinase IV substrate motif;Casein kinase II substrate motif;Chk1 kinase substrate motif;DNA dependent Protein kinase substrate motif;PKA kinase substrate motif;PKC kinase substrate motif	0.972829	7.9227e-05	120.57	74.572	120.57	0.35766	UID246
28	B4DP61;A0A1W2PRV5;E7EQZ4;Q16637	28;28;28;28	B4DP61	B4DP61	Survival motor neuron protein	SMN2;SMN1	PEQEDSVLFRRGTGQSDDSDIWDDTALIKAY		0.728421	0.886431	-0.104095	-0.358242	0.771229	0.323269	1.12839	0.409037	0.391907	-0.0264091	NaN	-0.0415516	0.994316	0.99226	1.05953	0.0137768	S	2	___1	SMN	Survival motor neuron protein					Phosphoserine		P1 (binding site for GEMIN2)					Casein kinase II substrate motif	1	9.38736e-87	359.91	329.82	359.91	0.17998	UID247
609	A0A1W2PS85;R4GMW8;P28715	609;838;384	A0A1W2PS85	A0A1W2PS85	DNA repair protein complementing XP-G cells	BIVM-ERCC5;ERCC5	ARGRNAPAAVDEGSISPRTLSAIKRALDDDE		0.964481	0.985246	0.00795619	0.0459438	NaN	NaN	-0.485325	-0.59816	-0.122372	-0.293747	0.165556	-0.266058	-0.651014	-0.537624	-0.547438	-0.460564	S	2	___1		DNA repair protein complementing XP-G cells					Phosphoserine					In isoform 2.;In isoform 3.		Casein kinase II substrate motif;ERK1,2 kinase substrate motif;Growth associated histone HI kinase substrate motif;GSK-3, ERK1, ERK2, CDK5 substrate motif;PKA kinase substrate motif;PKC kinase substrate motif;WW domain binding motif	0.939072	9.02258e-10	149.6	129.82	149.6	3.451	UID250
25	A2A2D0;P16949	25;25	A2A2D0	A2A2D0	Stathmin	STMN1	ELEKRASGQAFELILSPRSKESVPEFPLSPP		0.226381	0.519416	0.517921	1.29855	-2.076	-3.02558	-3.56497	-2.78168	-2.5259	-2.38595	-2.04728	-3.14897	-3.2295	-3.55861	-4.23866	NaN	S	2	___1	Stathmin	Stathmin				SLD	Phosphoserine| by CDK1| MAPK1 and MAPK3							Casein kinase II substrate motif;ERK1,2 kinase substrate motif;Growth associated histone HI kinase substrate motif;GSK-3, ERK1, ERK2, CDK5 substrate motif;PKA kinase substrate motif;PKC kinase substrate motif;WW domain binding motif	0.999997	0.0294518	59.898	49.375	59.898	-0.62424	UID255	ERK1;CDK1;CDK2;P38D;PKCB
38	A2A2D0;P16949	38;38	A2A2D0	A2A2D0	Stathmin	STMN1	ILSPRSKESVPEFPLSPPKKKDLSLEEIQKK		0.520885	0.788177	0.19998	0.671387	-0.108871	-0.479641	-1.43531	-0.920134	-0.783052	NaN	-0.229706	-0.805902	-1.32767	-1.15827	-1.20535	NaN	S	2	___1	Stathmin	Stathmin				SLD	Phosphoserine| by CDK1| MAPK1 and MAPK3							Cdc2 kinase substrate motif;CDK kinase substrate motif;CDK1,2,4,6 kinase substrate motif;CDK4 kinase substrate motif;ERK1,2 kinase substrate motif;GSK-3, ERK1, ERK2, CDK5 substrate motif;WW domain binding motif	1	0.00186352	91.858	61.603	91.858	-0.16836	UID256	ERK1;KIS;CDK1;CDK2;PAK1;P38D;PKCB
446	A6PW57;Q99755;A2A3N6	446;458;405	A6PW57	A6PW57	Phosphatidylinositol 4-phosphate 5-kinase type-1 alpha;Putative PIP5K1A and PSMD4-like protein	PIP5K1A;PIPSL	RFMCNTVFKKIPLKPSPSKKFRSGSSFSRRA		0.0518848	0.232108	0.683452	2.23951	-0.789076	-0.761574	-1.99318	-1.04153	-0.910418	-0.766485	-1.24775	-1.41503	-2.60062	-1.84732	-1.52509	NaN	S	2	___1		Phosphatidylinositol 4-phosphate 5-kinase type-1 alpha;Putative PIP5K1A and PSMD4-like protein										In isoform 2.		Casein kinase II substrate motif;Cdc2 kinase substrate motif;CDK kinase substrate motif;CDK1,2,4,6 kinase substrate motif;DNA dependent Protein kinase substrate motif;ERK1,2 kinase substrate motif;GSK-3, ERK1, ERK2, CDK5 substrate motif;PKA kinase substrate motif;PKC kinase substrate motif;WW domain binding motif	0.984661	0.000987159	97.734	49.31	97.734	-1.2184	UID258
158	A4D1S0	158	A4D1S0	A4D1S0	Killer cell lectin-like receptor subfamily G member 2	KLRG2	SPRPSTRFLKVPVPESPAFSRHADPAHQLLL		0.65524	0.849529	0.18133	0.461718	-0.0371971	-0.587614	-0.617655	-1.48804	-0.0421181	0.425737	0.232672	-0.640528	-1.47021	-0.723013	-0.261311	NaN	S	2	___1		Killer cell lectin-like receptor subfamily G member 2		Pro-rich										b-Adrenergic Receptor kinase substrate motif;ERK1,2 kinase substrate motif;G protein-coupled receptor kinase 1 substrate motif;GSK3 kinase substrate motif;GSK-3, ERK1, ERK2, CDK5 substrate motif;WW domain binding motif	0.999905	9.31978e-07	134.99	111.98	134.99	-0.73256	UID261
420	A6NDB9	420	A6NDB9	A6NDB9	Paralemmin-3	PALM3	GSEEKPGTGRDEAEMSPVVERKGGEKKLELE		0.400252	0.701469	0.13721	0.895525	NaN	NaN	-0.869217	-0.471188	-0.658224	-0.680563	-0.787863	NaN	-1.218	-0.722427	-0.477211	-0.829535	S	2	___1		Paralemmin-3		Glu-rich			Phosphoserine							ERK1,2 kinase substrate motif;GSK-3, ERK1, ERK2, CDK5 substrate motif;WW domain binding motif	1	0.000379767	107.65	84.42	103.75	0.82388	UID262
303	A6NDB9	303	A6NDB9	A6NDB9	Paralemmin-3	PALM3	AMGEIGRVPEVVQTSSPRLQERLEAAASIEG		0.501894	0.775907	0.293476	0.707894	NaN	0.496023	0.364069	0.312218	0.210333	0.586458	NaN	0.988508	NaN	0.447313	0.158361	-1.19281	S	2	___1		Paralemmin-3		Glu-rich										ERK1,2 kinase substrate motif;Growth associated histone HI kinase substrate motif;GSK-3, ERK1, ERK2, CDK5 substrate motif;MDC1 BRCT domain binding motif;PKA kinase substrate motif;PKC kinase substrate motif;Plk1 PBD domain binding motif;WW domain binding motif	0.995752	7.11246e-50	280.91	178.93	264.09	0.69581	UID263
79	A6NL93;A6NEL0;P05114	79;105;89	A6NL93	A6NL93	Non-histone chromosomal protein HMG-14	HMGN1	LPAENGETKTEESPASDEAGEKEAKSD____		0.51553	0.78085	0.216182	0.676831	0.185783	-0.134781	1.18574	1.31293	NaN	1.0519	0.185587	0.210392	1.09306	0.537539	0.869011	0.129211	S	2	___1	HMG14_17	Non-histone chromosomal protein HMG-14					Phosphoserine							Casein kinase II substrate motif	1	1.03632e-19	217.2	177.28	205.62	0.020683	UID264	CK2A1
228	D6R9V6;A6NJ38;A6NHM7;Q7Z5H3	228;236;286;395	D6R9V6	D6R9V6	Rho GTPase-activating protein 22	ARHGAP22	QGEPGGPGLPAHRTSSLDGAAVAVLSRTAPT		0.295993	0.604545	0.257278	1.10947	-2.1917	-2.46336	-2.46766	-1.60383	-1.78984	-1.76471	-1.87369	-2.82638	-2.32238	-2.51559	-1.98261	NaN	S	2	___1		Rho GTPase-activating protein 22												14-3-3 domain binding motif;Calmodulin-dependent protein kinase II substrate motif;G protein-coupled receptor kinase 1 substrate motif;MDC1 BRCT domain binding motif;Phosphorylase kinase substrate motif;PKA kinase substrate motif;PKC kinase substrate motif;Plk1 PBD domain binding motif	0.83442	0.00435505	72.958	57.202	72.958	0.25072	UID266
1385	A6NNK5;Q12888	1385;1430	A6NNK5	A6NNK5	Tumor suppressor p53-binding protein 1	TP53BP1	AVPGPLGIEDISPNLSPDDKSFSRVVPRVPD		0.397542	0.703554	0.333183	0.888214	-0.467247	-0.332045	0.248402	-0.0125198	-0.0706024	0.231089	-1.7785	-0.754374	0.246531	0.140148	0.144505	NaN	S	2	___1		Tumor suppressor p53-binding protein 1					Phosphoserine							Casein kinase II substrate motif;ERK1,2 kinase substrate motif;GSK-3, ERK1, ERK2, CDK5 substrate motif;MAPKAPK2 kinase substrate motif;Pyruvate dehydrogenase kinase substrate motif;WW domain binding motif	0.99971	2.47942e-06	118.44	95.563	114.88	-0.86384	UID268
227	A6NNK5;Q12888;C9JXV0	227;222;227	A6NNK5	A6NNK5	Tumor suppressor p53-binding protein 1	TP53BP1	LSDVDANTAIKHEEQSNEDIPIAEQSSKDIP		0.0770998	0.290709	-0.559498	-2.13103	-2.04064	NaN	-2.14515	-1.99648	-1.63382	NaN	NaN	NaN	-0.904928	-1.3577	-1.27096	-2.04452	S	2	___1		Tumor suppressor p53-binding protein 1					Phosphoserine							Casein kinase I substrate motif;Casein kinase II substrate motif;Pyruvate dehydrogenase kinase substrate motif	1	2.74352e-06	116.24	103.04	116.24	0.0078061	UID270
557	A6NNK5;Q12888;C9JXV0	557;552;557	A6NNK5	A6NNK5	Tumor suppressor p53-binding protein 1	TP53BP1	DEDGENTQIEDTEPMSPVLNSKFVPAENDSI		0.734892	0.891446	-0.0588811	-0.348223	1.84513	1.80253	1.36789	1.49031	1.49266	1.9086	1.60148	1.681	1.73377	1.58685	2.34981	1.30751	S	2	___1		Tumor suppressor p53-binding protein 1					Phosphoserine							Casein kinase I substrate motif;ERK1,2 kinase substrate motif;GSK-3, ERK1, ERK2, CDK5 substrate motif;WW domain binding motif	0.994239	1.14205e-19	187.06	162.87	187.06	0.39153	UID271
1633	A6NNK5;Q12888;H7BZY0	1633;1678;146	A6NNK5	A6NNK5	Tumor suppressor p53-binding protein 1	TP53BP1	VLSGKRKLITSEEERSPAKRGRKSATVKPGA		0.992191	0.998949	-0.00204786	-0.0100342	0.00877762	0.165512	-0.883545	-0.547451	-0.466734	-0.0129185	-0.308985	-0.148722	-0.263773	-0.819727	0.0598698	-0.242735	S	2	___1		Tumor suppressor p53-binding protein 1					Phosphoserine							Casein kinase I substrate motif;Cdc2 kinase substrate motif;CDK kinase substrate motif;CDK1,2,4,6 kinase substrate motif;ERK1,2 kinase substrate motif;Growth associated histone HI kinase substrate motif;GSK-3, ERK1, ERK2, CDK5 substrate motif;WW domain binding motif	1	3.76336e-21	278.16	217.91	188.9	2.0197	UID273	Chk1;CDK1
505	A6NNK5;Q12888;C9JXV0	505;500;505	A6NNK5	A6NNK5	Tumor suppressor p53-binding protein 1	TP53BP1	LTVECSKTSEIEPKNSPEDLGLSLTGDSCKL		0.456814	0.743909	-0.136605	-0.774045	0.8624	1.01368	1.00985	1.10252	0.913645	1.28939	1.17645	1.06393	1.36991	1.30117	1.65075	0.448906	S	2	___1		Tumor suppressor p53-binding protein 1					Phosphoserine							AMP-activated protein kinase substrate motif;Casein kinase II substrate motif;ERK1,2 kinase substrate motif;GSK-3, ERK1, ERK2, CDK5 substrate motif;PKA kinase substrate motif;PKC kinase substrate motif;Pyruvate dehydrogenase kinase substrate motif;WW domain binding motif	1	3.22787e-42	297.55	279.65	246.49	-1.1962	UID277
270	A6NNK5;Q12888;C9JXV0	270;265;270	A6NNK5	A6NNK5	Tumor suppressor p53-binding protein 1	TP53BP1	KEQNPPPARSEDMPFSPKASVAAMEAKEQLS		0.591074	0.831358	-0.0977011	-0.555028	-1.21162	-1.05083	-0.928478	-0.796125	-0.478136	-0.158695	-0.82872	-0.565727	-0.921623	-0.745052	-0.485563	-0.490995	S	2	___1		Tumor suppressor p53-binding protein 1					Phosphoserine							ERK1,2 kinase substrate motif;G protein-coupled receptor kinase 1 substrate motif;Growth associated histone HI kinase substrate motif;GSK3 kinase substrate motif;GSK-3, ERK1, ERK2, CDK5 substrate motif;PKA kinase substrate motif;PKC kinase substrate motif;WW domain binding motif	1	4.18309e-05	141.44	115.03	141.44	0.57022	UID280
385	A6NNK5;Q12888;C9JXV0	385;380;385	A6NNK5	A6NNK5	Tumor suppressor p53-binding protein 1	TP53BP1	PSPDAFRSTPFIVPSSPTEQEGRQDKPMDTS		0.698686	0.874016	-0.0916882	-0.406201	NaN	-0.230335	0.217026	-0.00477409	NaN	0.355268	NaN	NaN	0.459913	0.464565	0.0966759	-0.317217	S	2	___1		Tumor suppressor p53-binding protein 1					Phosphoserine							Casein kinase II substrate motif;ERK1,2 kinase substrate motif;GSK-3, ERK1, ERK2, CDK5 substrate motif;MDC1 BRCT domain binding motif;Plk1 PBD domain binding motif;WW domain binding motif	0.801011	3.64687e-13	160.8	117.03	160.8	-1.1959	UID282
65	E5RGQ4;E9PGW9;E7EV93;A6NNN6;E7ETA6;Q15154	65;65;65;65;65;65	E5RGQ4	E5RGQ4	Pericentriolar material 1 protein	PCM1	KKFGVESDKRVTNDISPESSPGVGRRRTKTP		0.129142	0.386811	0.365992	1.69181	-0.430414	-0.661524	-0.372206	-0.200453	0.166433	0.21398	NaN	NaN	-0.43693	-0.332123	-0.510986	-1.04005	S	2	___1		Pericentriolar material 1 protein					Phosphoserine							Casein kinase II substrate motif;ERK1,2 kinase substrate motif;G protein-coupled receptor kinase 1 substrate motif;GSK3 kinase substrate motif;GSK-3, ERK1, ERK2, CDK5 substrate motif;WW domain binding motif	0.999999	2.51227e-26	241.64	178.55	241.64	0.91645	UID283
1756	A8MQ02;J3KN01;P55196;H0Y8U8;H0Y948;H0Y8L4	1756;1806;1799;99;166;288	A8MQ02	A8MQ02	Afadin	MLLT4	GAPENLTFKERQRLFSQGQDVSNKVKASRKL		0.663569	0.852872	-0.116246	-0.451571	-0.1605	-0.208931	0.313234	NaN	0.642508	0.452858	0.799471	-0.144339	0.0322456	0.162571	0.770451	NaN	S	2	___1		Afadin					Phosphoserine					In isoform 1.;In isoform 2.;In isoform 6.		14-3-3 domain binding motif;Akt kinase substrate motif;ATM kinase substrate motif;Calmodulin-dependent protein kinase II substrate motif;DNA dependent Protein kinase substrate motif;MAPKAPK1 kinase substrate motif;PKA kinase substrate motif;PKC kinase substrate motif	1	6.44587e-11	226.23	169.05	226.23	0.22619	UID284
1141	A8MQ02;J3KN01;P55196;Q5TIG5	1141;1189;1182;1182	A8MQ02	A8MQ02	Afadin	MLLT4	RADHRSSPNVANQPPSPGGKSAYASGTTAKI		0.672805	0.858864	0.0789588	0.434993	1.06042	1.18411	0.802946	0.8923	0.509157	0.673998	1.17015	1.27315	0.560009	0.687992	0.634016	0.32386	S	2	___1		Afadin					Phosphoserine							DNA dependent Protein kinase substrate motif;ERK1,2 kinase substrate motif;GSK-3, ERK1, ERK2, CDK5 substrate motif;WW domain binding motif	1	2.10798e-13	169.4	135.02	169.4	0.44679	UID287
1042	A8MQ02;J3KN01;P55196;Q5TIG5	1042;1090;1083;1083	A8MQ02	A8MQ02	Afadin	MLLT4	GLSQERAAELMTRTSSVVTLEVAKQGAIYHG		0.684296	0.86829	-0.0580212	-0.420054	0.634241	0.794703	-0.0137768	0.555956	0.499741	0.363049	0.50486	0.588053	0.323944	0.71851	0.516333	NaN	S	2	___1	PDZ	Afadin				PDZ								14-3-3 domain binding motif;Calmodulin-dependent protein kinase I substrate motif;Calmodulin-dependent protein kinase II alpha substrate motif;Calmodulin-dependent protein kinase II substrate motif;Calmodulin-dependent protein kinase IV substrate motif;Casein kinase II substrate motif;Chk1 kinase substrate motif;MDC1 BRCT domain binding motif;Phosphorylase kinase substrate motif;PKA kinase substr…	0.999957	1.07447e-07	186.02	153.8	164.48	0.25162	UID288
125	E9PS34;E9PNJ7;A8MXH2;E9PKT8;C9J6D1;C9JZI7;Q99733	125;125;94;137;125;137;125	E9PS34	E9PS34	Nucleosome assembly protein 1-like 4	NAP1L4	ITGDVEPTDAESEWHSENEEEEKL_______		0.416458	0.717688	-0.250869	-0.856844	3.01787	3.1006	3.10788	3.07147	3.57313	3.01222	NaN	NaN	4.13838	3.25057	3.68239	2.52092	S	3	___1	NAP	Nucleosome assembly protein 1-like 4					Phosphoserine							Casein kinase I substrate motif;Casein kinase II substrate motif;G protein-coupled receptor kinase 1 substrate motif;MAPKAPK2 kinase substrate motif	0.999998	1.65708e-62	273.41	241.34	273.41	-0.60645	UID291
443	A8MZ87;Q9H0B6	443;582	A8MZ87	A8MZ87	Kinesin light chain 2	KLC2	GTPQEPPNPRMKRASSLNFLNKSVEEPTQVG		0.594148	0.831231	0.106523	0.554878	-0.986109	-1.15745	-1.46406	-0.784819	-0.919317	-1.16162	-0.637207	-1.47171	NaN	-1.2497	-1.38305	NaN	S	2	___1		Kinesin light chain 2					Phosphoserine							14-3-3 domain binding motif;AMP-activated protein kinase substrate motif;Calmodulin-dependent protein kinase I substrate motif;Calmodulin-dependent protein kinase II alpha substrate motif;Calmodulin-dependent protein kinase II substrate motif;Calmodulin-dependent protein kinase IV substrate motif;Chk1 kinase substrate motif;MDC1 BRCT domain binding motif;Phosphorylase kinase substrate motif;PKA k…	0.996735	0.0137024	58.592	48.178	58.592	-0.53847	UID292	AMPKA1
747	A9Z1X7;E9PCT1;Q8IYB3	747;737;738	A9Z1X7;Q8IYB3	A9Z1X7	Serine/arginine repetitive matrix protein 1	SRRM1	RVSRTPEPKKIKKAASPSPQSVRRVSSSRSV		0.549603	0.807757	-0.162675	-0.619244	2.74215	2.97953	2.4304	2.35753	2.18679	1.67379	3.02225	3.09897	2.17816	2.17483	2.76233	2.1097	S	2	___1		Serine/arginine repetitive matrix protein 1		Pro-rich;Ser-rich			Phosphoserine							Calmodulin-dependent protein kinase II substrate motif;Casein kinase II substrate motif;Chk1 kinase substrate motif;ERK1,2 kinase substrate motif;GSK-3, ERK1, ERK2, CDK5 substrate motif;PKA kinase substrate motif;PKC kinase substrate motif;WW domain binding motif	1	1.39245e-06	190.26	173.35	138.42	-0.04945	UID293
749	A9Z1X7;E9PCT1;Q8IYB3	749;739;740	A9Z1X7;Q8IYB3	A9Z1X7	Serine/arginine repetitive matrix protein 1	SRRM1	SRTPEPKKIKKAASPSPQSVRRVSSSRSVSG		0.00952298	0.10612	-0.572699	-3.38836	NaN	NaN	1.13792	1.17743	0.997005	0.507416	1.49324	1.77384	1.5799	1.43844	1.7366	1.14382	S	2	___1		Serine/arginine repetitive matrix protein 1		Pro-rich;Ser-rich			Phosphoserine							Casein kinase II substrate motif;DNA dependent Protein kinase substrate motif;ERK1,2 kinase substrate motif;GSK-3, ERK1, ERK2, CDK5 substrate motif;WW domain binding motif	0.999999	1.39245e-06	172.21	155.25	128.36	-0.42838	UID294
705	A9Z1X7;E9PCT1;Q8IYB3	705;695;696	A9Z1X7;Q8IYB3	A9Z1X7	Serine/arginine repetitive matrix protein 1	SRRM1	RHSPSPRPRAPQTSSSPPPVRRGASSSPQRR		0.66224	0.852284	0.106803	0.450098	3.39445	3.35322	2.66133	2.8548	2.73893	2.46365	3.26049	3.41071	2.39998	2.54338	2.80327	2.40773	S	2	___1		Serine/arginine repetitive matrix protein 1		Arg-rich;Pro-rich;Ser-rich			Phosphoserine							ERK1,2 kinase substrate motif;GSK-3, ERK1, ERK2, CDK5 substrate motif;MDC1 BRCT domain binding motif;Plk1 PBD domain binding motif;WW domain binding motif	0.991787	9.20024e-22	262.43	220.98	241.51	0.61005	UID297
883	A9Z1X7;Q8IYB3	883;874	A9Z1X7;Q8IYB3	A9Z1X7	Serine/arginine repetitive matrix protein 1	SRRM1	QEEPVAAPEPKKETESEAEDNLDDLEKHLRE		0.0389202	0.208117	0.681657	2.37535	4.95148	4.73851	3.79196	3.9421	3.90192	4.18325	4.03373	4.18676	3.20474	3.33371	3.78291	2.87743	S	3	___1		Serine/arginine repetitive matrix protein 1					Phosphoserine							b-Adrenergic Receptor kinase substrate motif;Casein kinase I substrate motif;Casein kinase II substrate motif;G protein-coupled receptor kinase 1 substrate motif;PKA kinase substrate motif	1	4.28517e-149	448.94	373.97	105.46	0.13428	UID300
778	A9Z1X7;E9PCT1;Q8IYB3	778;768;769	A9Z1X7;Q8IYB3	A9Z1X7	Serine/arginine repetitive matrix protein 1	SRRM1	SGSPEPAAKKPPAPPSPVQSQSPSTNWSPAV		0.163261	0.427814	-1.02137	-1.55771	0.936678	1.45535	0.641323	0.00737381	NaN	0.153305	1.98146	NaN	0.784555	0.475454	3.39925	NaN	S	3	___1		Serine/arginine repetitive matrix protein 1		Pro-rich			Phosphoserine							DNA dependent Protein kinase substrate motif;ERK1,2 kinase substrate motif;G protein-coupled receptor kinase 1 substrate motif;GSK3 kinase substrate motif;GSK-3, ERK1, ERK2, CDK5 substrate motif;WW domain binding motif	0.999892	1.69711e-07	124.8	112.37	104.9	-0.43501	UID302
784	A9Z1X7;E9PCT1;Q8IYB3	784;774;775	A9Z1X7;Q8IYB3	A9Z1X7	Serine/arginine repetitive matrix protein 1	SRRM1	AAKKPPAPPSPVQSQSPSTNWSPAVPVKKAK		0.0126181	0.126379	-1.01806	-3.1997	0.860626	1.50439	NaN	0.438732	0.976055	0.240974	2.66162	NaN	1.74553	1.35685	1.87312	1.47396	S	3	___1		Serine/arginine repetitive matrix protein 1		Pro-rich			Phosphoserine							Casein kinase II substrate motif;ERK1,2 kinase substrate motif;GSK-3, ERK1, ERK2, CDK5 substrate motif;WW domain binding motif	0.992489	1.36894e-10	148.22	134.63	148.22	-0.91943	UID303
790	A9Z1X7;E9PCT1;Q8IYB3	790;780;781	A9Z1X7;Q8IYB3	A9Z1X7	Serine/arginine repetitive matrix protein 1	SRRM1	APPSPVQSQSPSTNWSPAVPVKKAKSPTPSP	+	0.00246855	0.0490833	-1.03607	-4.1543	1.99837	2.25059	2.59234	1.90413	2.4444	1.64133	3.76003	3.11819	3.29443	3.25144	NaN	2.44888	S	3	___1		Serine/arginine repetitive matrix protein 1		Pro-rich			Phosphoserine							ERK1,2 kinase substrate motif;G protein-coupled receptor kinase 1 substrate motif;GSK-3, ERK1, ERK2, CDK5 substrate motif;MAPKAPK2 kinase substrate motif;WW domain binding motif	0.999292	4.56134e-07	117.62	104.3	102.58	-1.2637	UID305
458	A9Z1X7;E9PCT1;Q8IYB3	458;462;463	A9Z1X7;Q8IYB3	A9Z1X7	Serine/arginine repetitive matrix protein 1	SRRM1	RESPSPAPKPRKVELSESEEDKGGKMAAADS		0.813502	0.925746	-0.0749877	-0.242936	0.00278854	-0.174227	-0.593822	-0.583071	-0.774881	-0.41287	0.514963	0.245626	-1.05968	-0.855457	-0.583914	NaN	S	2	___1		Serine/arginine repetitive matrix protein 1		Arg-rich;Ser-rich			Phosphoserine		Necessary for speckles and matrix localization					Casein kinase II substrate motif;G protein-coupled receptor kinase 1 substrate motif;PKA kinase substrate motif	1	2.63126e-49	292.45	249.42	113.35	1.8384	UID306
388	A9Z1X7;E9PCT1;Q8IYB3	388;392;393	A9Z1X7;Q8IYB3	A9Z1X7	Serine/arginine repetitive matrix protein 1	SRRM1	TSSPPRKTRRLSPSASPPRRRHRPSPPATPP		0.416172	0.718475	-0.151544	-0.848192	1.77301	1.30331	1.90922	1.96584	2.14519	2.39403	2.26396	2.33315	1.91114	1.87302	2.23296	1.78564	S	2	___1		Serine/arginine repetitive matrix protein 1		Arg-rich;Pro-rich;Ser-rich			Phosphoserine		Necessary for speckles and matrix localization					Cdc2 kinase substrate motif;CDK kinase substrate motif;CDK1,2,4,6 kinase substrate motif;ERK1,2 kinase substrate motif;GSK-3, ERK1, ERK2, CDK5 substrate motif;MAPKAPK2 kinase substrate motif;WW domain binding motif	1	6.56886e-06	198.37	167.3	45.28	0.17341	UID310
571	A9Z1X7;E9PCT1;Q8IYB3	571;561;562	A9Z1X7;Q8IYB3	A9Z1X7	Serine/arginine repetitive matrix protein 1	SRRM1	RRSPSPPPTRRRRSPSPAPPPRRRRTPTPPP		0.00260532	0.05104	-0.578834	-3.97896	-0.668129	-0.82044	-0.832451	-0.627121	-0.444885	-1.10059	-0.206417	0.264137	-0.533901	-0.171337	-0.00971985	-0.363377	S	2	___1		Serine/arginine repetitive matrix protein 1		Arg-rich;Pro-rich;Ser-rich			Phosphoserine		Necessary for speckles and matrix localization					14-3-3 domain binding motif;Akt kinase substrate motif;Calmodulin-dependent protein kinase II substrate motif;DNA dependent Protein kinase substrate motif;ERK1,2 kinase substrate motif;G protein-coupled receptor kinase 1 substrate motif;GSK-3, ERK1, ERK2, CDK5 substrate motif;MAPKAPK1 kinase substrate motif;PKA kinase substrate motif;PKC kinase substrate motif;WW domain binding motif;ZIP kinase s…	1	8.70126e-07	171.5	154.27	97.452	0.40172	UID317
625	A9Z1X7;E9PCT1;Q8IYB3	625;615;616	A9Z1X7;Q8IYB3	A9Z1X7	Serine/arginine repetitive matrix protein 1	SRRM1	QRRYSPSPPPKRRTASPPPPPKRRASPSPPP		0.658157	0.851891	-0.077356	-0.455965	2.47596	2.51566	2.14667	2.33628	2.32349	1.90111	2.39982	2.90429	2.03602	2.18852	2.60659	2.02805	S	2	___1		Serine/arginine repetitive matrix protein 1		Arg-rich;Pro-rich;Ser-rich			Phosphoserine		Necessary for speckles and matrix localization					14-3-3 domain binding motif;Akt kinase substrate motif;Calmodulin-dependent protein kinase II substrate motif;ERK1,2 kinase substrate motif;G protein-coupled receptor kinase 1 substrate motif;GSK-3, ERK1, ERK2, CDK5 substrate motif;MAPKAPK1 kinase substrate motif;PKA kinase substrate motif;PKC kinase substrate motif;WW domain binding motif;ZIP kinase substrate motif	1	2.52355e-05	176.6	133.73	98.898	-0.48965	UID320
606	A9Z1X7;E9PCT1;Q8IYB3	606;596;597	A9Z1X7;Q8IYB3	A9Z1X7	Serine/arginine repetitive matrix protein 1	SRRM1	PSPPPRRRSPSPRRYSPPIQRRYSPSPPPKR		0.720311	0.882354	0.115874	0.368321	4.17924	4.24528	3.1387	3.23952	4.14085	4.12241	4.45422	4.31626	3.00738	3.45427	3.84251	3.29611	S	2	___1		Serine/arginine repetitive matrix protein 1		Arg-rich;Pro-rich;Ser-rich			Phosphoserine		Necessary for speckles and matrix localization					14-3-3 domain binding motif;Calmodulin-dependent protein kinase II substrate motif;ERK1,2 kinase substrate motif;GSK-3, ERK1, ERK2, CDK5 substrate motif;PAK2 kinase substrate motif;PKA kinase substrate motif;PKC epsilon kinase substrate motif;PKC kinase substrate motif;WW domain binding motif	1	0.00118764	198.62	115.98	198.62	-2.233	UID322
806	A9Z1X7;Q8IYB3	806;797	A9Z1X7;Q8IYB3	A9Z1X7	Serine/arginine repetitive matrix protein 1	SRRM1	PAVPVKKAKSPTPSPSPPRNSDQEGGGKKKK		0.287032	0.592014	-0.21223	-1.12459	0.833569	1.02202	1.18306	1.59307	1.09913	1.72156	1.64406	1.68408	1.22838	1.56745	1.67267	0.929148	S	2	___1		Serine/arginine repetitive matrix protein 1		Pro-rich										Cdc2 kinase substrate motif;CDK kinase substrate motif;CDK1,2,4,6 kinase substrate motif;DNA dependent Protein kinase substrate motif;ERK1,2 kinase substrate motif;GSK-3, ERK1, ERK2, CDK5 substrate motif;WW domain binding motif	0.999627	5.40197e-06	200.67	150.64	180.2	0.63681	UID325
426	A9Z1X7;E9PCT1;Q8IYB3	426;430;431	A9Z1X7;Q8IYB3	A9Z1X7	Serine/arginine repetitive matrix protein 1	SRRM1	TPQQSNRTRKSRVSVSPGRTSGKVTKHKGTE		0.507568	0.776929	-0.175227	-0.68722	2.22565	2.11248	2.30353	2.63616	2.20656	1.52511	1.77641	3.21192	2.28444	2.21603	2.59394	1.97812	S	2	___1		Serine/arginine repetitive matrix protein 1		Arg-rich;Ser-rich			Phosphoserine		Necessary for speckles and matrix localization					Cdc2 kinase substrate motif;CDK kinase substrate motif;CDK1,2,4,6 kinase substrate motif;ERK1,2 kinase substrate motif;G protein-coupled receptor kinase 1 substrate motif;GSK-3, ERK1, ERK2, CDK5 substrate motif;WW domain binding motif	1	0.000117062	154.49	116.07	61.593	0.26078	UID331
765	A9Z1X7;E9PCT1;Q8IYB3	765;755;756	A9Z1X7;Q8IYB3	A9Z1X7	Serine/arginine repetitive matrix protein 1	SRRM1	PQSVRRVSSSRSVSGSPEPAAKKPPAPPSPV		0.532228	0.800592	-0.704503	-0.649518	NaN	0.372326	0.296524	0.234941	0.0558834	-4.736	0.732609	-1.76982	0.949293	1.30902	0.126724	-1.6524	S	2	___1		Serine/arginine repetitive matrix protein 1		Pro-rich;Ser-rich			Phosphoserine							Casein kinase II substrate motif;ERK1,2 kinase substrate motif;G protein-coupled receptor kinase 1 substrate motif;GSK-3, ERK1, ERK2, CDK5 substrate motif;MAPKAPK2 kinase substrate motif;WW domain binding motif	1	7.91024e-15	166.24	118.39	161.48	0.87677	UID333
547	A9Z1X7	547	A9Z1X7	A9Z1X7		SRRM1	QKETSPRMQMGKRWQSPVTKSGRRRRSPSPP		0.200433	0.482573	-0.260775	-1.37075	2.19963	1.95791	1.65548	1.63704	1.75967	1.62424	2.63884	2.43962	1.87053	1.79485	2.0804	1.57438	S	2	___1														14-3-3 domain binding motif;Calmodulin-dependent protein kinase II substrate motif;Casein kinase II substrate motif;ERK1,2 kinase substrate motif;GSK-3, ERK1, ERK2, CDK5 substrate motif;PKA kinase substrate motif;PKC kinase substrate motif;WW domain binding motif	0.999999	0.000160866	156.18	113.58	146.68	-0.10665	UID334
59	B0QY95;Q9NQG6	59;59	B0QY95	B0QY95	Mitochondrial dynamics protein MID51	MIEF1	LAVKRMYDRAISAPTSPTRLSHSGKRSWEEP		0.018215	0.144613	0.536238	2.87875	1.38132	1.27987	0.779715	1.06455	1.31743	1.38114	NaN	1.19117	0.462334	0.651476	0.827806	0.189371	S	2	___1		Mitochondrial dynamics protein MID51					Phosphoserine		Dimerization				Cytoplasmic	Casein kinase II substrate motif;Cdc2 kinase substrate motif;CDK kinase substrate motif;CDK1,2,4,6 kinase substrate motif;ERK1,2 kinase substrate motif;Growth associated histone HI kinase substrate motif;GSK-3, ERK1, ERK2, CDK5 substrate motif;MAPKAPK2 kinase substrate motif;WW domain binding motif	0.995491	9.20897e-06	193.3	157.94	193.3	0.23616	UID335
540	B1AKL4;Q9NRA8	540;564	B1AKL4	B1AKL4	Eukaryotic translation initiation factor 4E transporter	EIF4ENIF1	GSLEPTTSLLGQRAPSPPLSQVFQTRAASAD		0.475002	0.759962	0.157441	0.749525	-1.43292	-1.51537	-1.43711	-1.23247	-1.10509	-0.945637	NaN	-1.21267	-1.98306	-1.58699	-0.959438	NaN	S	2	___1	EIF4E-T	Eukaryotic translation initiation factor 4E transporter					Phosphoserine							14-3-3 domain binding motif;Calmodulin-dependent protein kinase II substrate motif;DNA dependent Protein kinase substrate motif;ERK1,2 kinase substrate motif;G protein-coupled receptor kinase 1 substrate motif;GSK3 kinase substrate motif;GSK-3, ERK1, ERK2, CDK5 substrate motif;PKA kinase substrate motif;PKC kinase substrate motif;WW domain binding motif	0.99988	0.00964022	67.93	55.37	67.93	3.6442	UID337
927	B1AKL4;Q9NRA8	927;951	B1AKL4	B1AKL4	Eukaryotic translation initiation factor 4E transporter	EIF4ENIF1	HMHSQLEHRPSQRSSSPVGLAKWFGSDVLQQ		0.746725	0.89251	0.0811913	0.333048	-0.795025	-0.719107	-1.44646	-0.489687	-0.477432	-1.4432	-1.31497	-0.468098	-1.19818	-0.790577	-1.1099	NaN	S	2	___1		Eukaryotic translation initiation factor 4E transporter					Phosphoserine							14-3-3 domain binding motif;Calmodulin-dependent protein kinase II substrate motif;ERK1,2 kinase substrate motif;GSK-3, ERK1, ERK2, CDK5 substrate motif;MDC1 BRCT domain binding motif;PKA kinase substrate motif;PKC kinase substrate motif;Plk1 PBD domain binding motif;WW domain binding motif	0.99931	0.0106957	65.719	18.533	65.719	-1.2049	UID338
74	B1AKL4;Q9NRA8;B1AKL5	74;74;74	B1AKL4	B1AKL4	Eukaryotic translation initiation factor 4E transporter	EIF4ENIF1	GVWDPEKWHASLYPASGRSSPVESLKKELDT		0.555461	0.809229	-0.186042	-0.612349	-0.794653	-0.648485	-1.42369	-1.46692	-1.10473	-1.70709	-0.227978	-1.80945	-1.14177	-1.1746	-0.67062	NaN	S	2	___1	EIF4E-T	Eukaryotic translation initiation factor 4E transporter												Casein kinase II substrate motif;G protein-coupled receptor kinase 1 substrate motif;GSK3 kinase substrate motif;PKA kinase substrate motif;PKC kinase substrate motif	0.999958	0.00176739	92.247	80.653	92.247	0.17074	UID339
20	D6RA28;B1AKN3;Q9P2R6	20;332;600	D6RA28	D6RA28	Arginine-glutamic acid dipeptide repeats protein	RERE	RSGRKKQPASPDGRTSPINEDIRSSGRNSPS		0.318723	0.624667	0.192126	1.05546	-0.340027	-0.269724	-0.337145	-0.34197	0.285837	0.00749588	0.0938683	NaN	-0.417494	-0.308414	-0.28772	-0.870483	S	2	___1	Atrophin-1	Arginine-glutamic acid dipeptide repeats protein												ERK1,2 kinase substrate motif;GSK-3, ERK1, ERK2, CDK5 substrate motif;PKA kinase substrate motif;PKC kinase substrate motif;WW domain binding motif	0.820713	0.00379957	79.201	55.351	55.401	0.67932	UID340
76	D6RA28;B1AKN3;Q9P2R6	76;388;656	D6RA28	D6RA28	Arginine-glutamic acid dipeptide repeats protein	RERE	SSPLKSNKRQREKVASDTEEADRTSSKKTKT		0.720141	0.882717	-0.310895	-0.373064	NaN	-4.27353	-0.866966	-0.918978	-0.951149	-1.57077	NaN	-2.56628	-0.920446	NaN	-0.573147	-1.56167	S	2	___1	Atrophin-1	Arginine-glutamic acid dipeptide repeats protein					Phosphoserine							Casein kinase II substrate motif;PKA kinase substrate motif;PKC kinase substrate motif	0.999998	7.97441e-05	120.96	68.381	120.96	1.1868	UID341
34	F6SJA5;E7EUY6;E9PDQ5;B1ALK7;Q15052;Q14155	34;340;262;340;488;518	F6SJA5	F6SJA5	Rho guanine nucleotide exchange factor 6;Rho guanine nucleotide exchange factor 7	ARHGEF7;ARHGEF6	LFPNVLLMLSASPRMSGFIYQGKLPTTGMTI		0.558146	0.809516	0.11255	0.60811	-0.0535202	0.0691166	-0.0413055	0.0572605	0.602432	0.920057	0.256664	0.101004	0.118925	0.180744	0.0749474	NaN	S	2	___1	PH	Rho guanine nucleotide exchange factor 6;Rho guanine nucleotide exchange factor 7				PH	Phosphoserine							MAPKAPK2 kinase substrate motif;PKA kinase substrate motif;PKC kinase substrate motif	1	4.89812e-05	149.17	129.46	136.84	-1.4796	UID342	PKCT;PKCG
442	H0Y3V3;H0Y5C0;B1ALU1;B1ALU3;O95490	442;1322;1355;1402;1430	H0Y3V3	H0Y3V3	Latrophilin-2	ADGRL2;LPHN2	AGHQLQMCYQISRGNSDGYIIPINKEGCIPE		0.844752	0.944946	0.048122	0.202274	-1.68182	NaN	-0.785936	-0.999878	-1.15546	-0.713209	-1.5666	-1.38211	-0.957138	-0.634212	-1.03684	NaN	S	2	___1	Latrophilin	Latrophilin-2					Phosphoserine					In isoform 3.;In isoform 4.	Cytoplasmic	14-3-3 domain binding motif;Calmodulin-dependent protein kinase I substrate motif;Calmodulin-dependent protein kinase II substrate motif;Calmodulin-dependent protein kinase IV substrate motif;Casein kinase II substrate motif;Chk1 kinase substrate motif;MAPKAPK2 kinase substrate motif;PKA kinase substrate motif;PKC kinase substrate motif	1	1.80923e-08	158.06	129.14	158.06	-0.059049	UID343
25	E5RHT1;B1AP22;P49810	25;58;25	E5RHT1	E5RHT1	Presenilin;Presenilin-2;Presenilin-2 NTF subunit;Presenilin-2 CTF subunit	PSEN2	EEEVCDERTSLMSAESPTPRSCQEGRQGPED		0.0167498	0.137389	0.490929	2.86717	-0.49069	-0.0349483	-0.608152	-0.00434494	0.00521851	0.11854	-0.621254	-0.303135	-0.71575	-0.568521	-0.566013	-1.18528	S	2	___1		Presenilin-2 NTF subunit					Phosphoserine						Cytoplasmic	b-Adrenergic Receptor kinase substrate motif;Casein kinase II substrate motif;ERK1,2 kinase substrate motif;GSK-3, ERK1, ERK2, CDK5 substrate motif;WW domain binding motif	0.89633	1.10679e-08	191.48	161.67	89.013	2.825	UID345
662	B1AUU8;P42566	662;796	B1AUU8	B1AUU8	Epidermal growth factor receptor substrate 15	EPS15	PCPLPPGKRSINKLDSPDPFKLNDPFQPFPG		0.972228	0.989169	0.00820649	0.0357941	-1.27057	-1.29198	-2.28102	-1.57149	-1.46423	-1.13462	-1.32822	-1.25068	-2.08428	-1.49877	-1.39067	NaN	S	2	___1		Epidermal growth factor receptor substrate 15		Pro-rich			Phosphoserine		15 X 3 AA repeats of D-P-F					b-Adrenergic Receptor kinase substrate motif;Calmodulin-dependent protein kinase II substrate motif;Chk1 kinase substrate motif;ERK1,2 kinase substrate motif;GSK-3, ERK1, ERK2, CDK5 substrate motif;PKA kinase substrate motif;PKC kinase substrate motif;WW domain binding motif	1	0.0103476	81.338	35.179	81.338	0.40739	UID346	P38A
680	B1AUU8;P42566	680;814	B1AUU8	B1AUU8	Epidermal growth factor receptor substrate 15	EPS15	PFKLNDPFQPFPGNDSPKEKDPEIFCDPFTS		0.111097	0.357432	-0.180222	-1.76662	-1.54695	-1.62996	-1.44786	-1.35034	-1.32353	-1.26134	-1.40497	-1.13276	-1.33691	-1.40241	-0.95517	NaN	S	2	___1		Epidermal growth factor receptor substrate 15		Pro-rich			Phosphoserine		15 X 3 AA repeats of D-P-F					b-Adrenergic Receptor kinase substrate motif;Casein kinase II substrate motif;ERK1,2 kinase substrate motif;Growth associated histone HI kinase substrate motif;GSK-3, ERK1, ERK2, CDK5 substrate motif;PKA kinase substrate motif;PKC kinase substrate motif;WW domain binding motif	1	0.0265916	62.408	43.812	62.408	3.425	UID347
302	H7C0W5;H7C1Q6;H7BXF4;B1PBA3;Q9NXE4	302;667;763;792;753	H7C0W5	H7C0W5	Sphingomyelin phosphodiesterase 4	SMPD4	RYHLTEPGLASRHLLSPVGRRQVAGHT____		0.0149033	0.137147	0.74726	3.08939	-1.8591	-2.06032	-2.666	-2.10535	-1.98073	-1.71914	-2.64684	-2.26667	-3.24934	NaN	-3.08662	NaN	S	2	___1	mit_SMPDase	Sphingomyelin phosphodiesterase 4												ERK1,2 kinase substrate motif;GSK-3, ERK1, ERK2, CDK5 substrate motif;WW domain binding motif	1	0.0199663	57.96	35.874	57.96	-0.27466	UID348
203	B4DFG0;P35659;H0Y8X0	203;231;107	B4DFG0	B4DFG0	Protein DEK	DEK	KAKRTKCPEILSDESSSDEDEKKNKEESSDD	+	0.000448051	0.0245714	-1.39106	-5.71217	-1.31752	-1.81404	-0.898495	-1.12316	-1.27061	-1.09754	NaN	-0.458118	0.601051	0.396358	0.010725	NaN	S	2	___1		Protein DEK		Asp/Glu-rich (acidic)			Phosphoserine							Casein kinase I substrate motif;Casein kinase II substrate motif;MAPKAPK2 kinase substrate motif;MDC1 BRCT domain binding motif;Plk1 PBD domain binding motif	0.972165	1.098e-65	296.95	262.65	292.44	-0.75563	UID352
279	B4DFG0;P35659;H0Y993	279;307;83	B4DFG0	B4DFG0	Protein DEK	DEK	KNQNSSKKESESEDSSDDEPLIKKLKKPPTD		0.428007	0.726295	-0.460918	-0.829996	-0.454636	-0.340302	0.128202	0.663015	0.0475063	0.37867	NaN	-1.53198	1.48246	1.5211	1.10538	0.079689	S	2	___1		Protein DEK		Asp/Glu-rich (acidic)			Phosphoserine| by CK2							BARD1 BRCT domain binding motif;Casein kinase I substrate motif;Casein kinase II substrate motif;G protein-coupled receptor kinase 1 substrate motif;MAPKAPK2 kinase substrate motif;MDC1 BRCT domain binding motif;Plk1 PBD domain binding motif	1	3.04398e-171	467.35	385.47	261.28	1.335	UID357
668	B4DGU4;P35222	668;675	B4DGU4	B4DGU4	Catenin beta-1	CTNNB1	FRMSEDKPQDYKKRLSVELTSSLFRTEPMAW		0.663919	0.852135	0.131366	0.44769	0.256277	0.441214	0.109999	0.597534	0.0382195	0.926262	0.921728	0.52039	0.126289	0.366201	0.569603	-0.922901	S	2	___1		Catenin beta-1					Phosphoserine					In isoform 2.		Aurora-A kinase substrate motif;Casein kinase II substrate motif;G protein-coupled receptor kinase 1 substrate motif;PAK2 kinase substrate motif;Phosphorylase kinase substrate motif;Pim1 kinase substrate sequence;PKA kinase substrate motif;PKC kinase substrate motif	1	6.64999e-09	208.39	155.35	208.39	0.6855	UID359	PKACA;PAK4;MEKK2;PAK1
545	B4DGU4;P35222	545;552	B4DGU4	B4DGU4	Catenin beta-1	CTNNB1	VQLLVRAHQDTQRRTSMGGTQQQFVEGVRME		0.649575	0.846301	0.105699	0.468351	1.6987	1.70977	1.02163	1.15878	2.09113	1.6715	1.49502	1.77093	1.20983	1.45009	1.93072	0.860731	S	2	___1		Catenin beta-1					Phosphoserine					In isoform 2.		14-3-3 domain binding motif;Aurora-A kinase substrate motif;Calmodulin-dependent protein kinase II substrate motif;G protein-coupled receptor kinase 1 substrate motif;PAK2 kinase substrate motif;PKA kinase substrate motif;PKC epsilon kinase substrate motif;PKC kinase substrate motif	0.892504	9.9804e-18	184.22	149.02	106.19	0.62503	UID360	CAMK2A;PKACA;Akt2;Akt1
184	B4DGU4;P35222	184;191	B4DGU4	B4DGU4	Catenin beta-1	CTNNB1	HQLSKKEASRHAIMRSPQMVSAIVRTMQNTN		0.315084	0.621065	0.230808	1.05767	-0.229065	0.180349	-0.345535	-0.117842	-0.121042	0.171724	0.164629	-0.0286827	-0.194359	-0.143496	-0.41501	-1.22934	S	2	___1	HEAT_2	Catenin beta-1					Phosphoserine| by CDK5					In isoform 2.		ERK1,2 kinase substrate motif;Growth associated histone HI kinase substrate motif;GSK-3, ERK1, ERK2, CDK5 substrate motif;WW domain binding motif	1	7.67826e-05	124.12	61.653	115.92	0.92308	UID361	CDK5
279	B4DSN5;P18031	279;352	B4DSN5	B4DSN5	Tyrosine-protein phosphatase non-receptor type;Tyrosine-protein phosphatase non-receptor type 1	PTPN1	ETQEDKDCPIKEEKGSPLNAAPYGIESMSQD		0.400429	0.700436	0.173605	0.895169	-0.94957	-0.822695	-0.675938	-0.0502968	NaN	NaN	-0.907854	-0.977898	-0.855257	-0.635866	-0.614273	NaN	S	2	___1		Tyrosine-protein phosphatase non-receptor type 1					Phosphoserine							Casein kinase I substrate motif;ERK1,2 kinase substrate motif;G protein-coupled receptor kinase 1 substrate motif;GSK-3, ERK1, ERK2, CDK5 substrate motif;PKA kinase substrate motif;PKC kinase substrate motif;WW domain binding motif	1	8.24479e-06	109.66	87.82	107.45	1.6089	UID362
43	B4E349;F5H6D8;B4DTN4;Q86U44	43;43;43;43	B4E349	B4E349	N6-adenosine-methyltransferase 70 kDa subunit	METTL3	QDSGHLDLRNPEAALSPTFRSDSPVPTAPTS		0.0938295	0.326536	0.429559	1.90096	-2.63223	-2.91778	-2.89727	-2.71879	-2.50418	-2.19659	-2.51952	NaN	-3.61328	-3.17509	-2.98824	NaN	S	2	___1		N6-adenosine-methyltransferase 70 kDa subunit					Phosphoserine					In isoform 2.		Casein kinase II substrate motif;ERK1,2 kinase substrate motif;GSK-3, ERK1, ERK2, CDK5 substrate motif;WW domain binding motif	0.8634	0.0106888	63.408	40.032	63.408	-1.0357	UID363
778	B4DTR1;P04626	778;1054	B4DTR1	B4DTR1	Receptor protein-tyrosine kinase;Receptor tyrosine-protein kinase erbB-2	ERBB2	AGGMVHHRHRSSSTRSGGGDLTLGLEPSEEE		0.172867	0.441344	-0.266024	-1.51775	NaN	NaN	-0.530966	-0.431753	-0.792585	-0.482298	-0.631153	-0.573256	-0.280958	-0.101954	0.120436	NaN	S	2	___1		Receptor tyrosine-protein kinase erbB-2					Phosphoserine					In isoform 6.	Cytoplasmic	MAPKAPK2 kinase substrate motif	0.999993	1.52886e-27	215.23	197.97	215.23	-1.0319	UID364
710	B4DTS2;Q9BZL6	710;710	B4DTS2	B4DTS2	Serine/threonine-protein kinase;Serine/threonine-protein kinase D2	PRKD2	DFGFARIIGEKSFRRSVVGTPAYLAPEVLLN		0.458016	0.74486	-0.291746	-0.785322	-2.008	NaN	-1.38054	-2.28451	-1.02907	NaN	-0.974808	NaN	-1.59461	-1.90699	-0.663475	-1.77903	S	3	___1	Pkinase	Serine/threonine-protein kinase D2				Protein kinase	Phosphoserine	Constitutive kinase activity| when associated with E-706 or with E-244 and E-706						G protein-coupled receptor kinase 1 substrate motif;MAPKAPK2 kinase substrate motif;NIMA kinase substrate motif;PKA kinase substrate motif;PKC kinase substrate motif	0.999815	2.82304e-06	117.18	107.43	111.6	0.44786	UID366	PKCH;PKCE;PKCA
324	E7EU85;E9PFF5;B4DXZ6;P51114	324;360;396;409	E7EU85	E7EU85	Fragile X mental retardation syndrome-related protein 1	FXR1	NYTSGYGTNSELSNPSETESERKDELSDWSL		0.634026	0.837619	0.0937796	0.492692	0.0268059	-0.0999317	-0.0986519	-0.502439	0.253607	-0.202801	NaN	-0.256714	-0.0257187	-0.0414047	0.158636	-0.823206	S	3	___1	FXMRP1_C_core	Fragile X mental retardation syndrome-related protein 1					Phosphoserine							Casein kinase II substrate motif;DNA dependent Protein kinase substrate motif;G protein-coupled receptor kinase 1 substrate motif;GSK3 kinase substrate motif	0.790993	7.37928e-06	95.878	76.568	88.293	0.32422	UID367
73	H7C2Y0;B5MCX3;Q15019	73;178;218	H7C2Y0	H7C2Y0	Septin-2	SEPT2	IEEHNIKIYHLPDAESDEDEDFKEQTRLLKA		0.169271	0.437093	-0.435613	-1.49444	3.58526	3.4984	4.13101	4.09283	4.94078	3.67129	NaN	3.84718	4.74526	4.69214	4.67406	4.1524	S	2	___1	Septin	Septin-2				Septin-type G	Phosphoserine	Loss of phosphorylation						b-Adrenergic Receptor kinase substrate motif;Casein kinase I substrate motif;Casein kinase II substrate motif;Pyruvate dehydrogenase kinase substrate motif	1	3.45352e-43	263.2	220.28	263.2	-0.57327	UID371	CK2A1
89	K7ELA4;B5MD17;J3KS05;P83916;C9JWS9	89;89;89;89;89	K7ELA4	K7ELA4	Chromobox protein homolog 1	CBX1	AHETDKSEGGKRKADSDSEDKGEESKPKKKK		0.94333	0.981919	0.0275685	0.0728915	-1.52695	-1.5208	-2.62456	-2.40975	-1.00722	-1.59324	-2.17939	-1.28452	-2.11144	-2.61406	-0.694418	-1.96409	S	3	___1		Chromobox protein homolog 1					Phosphoserine							b-Adrenergic Receptor kinase substrate motif;Casein kinase II substrate motif;PKA kinase substrate motif;PKC kinase substrate motif	0.892456	0.00137708	78.008	57.357	41.115	0.4239	UID372
166	Q99613;B5ME19;H3BPE3	166;166;96	Q99613	Q99613	Eukaryotic translation initiation factor 3 subunit C;Eukaryotic translation initiation factor 3 subunit C-like protein	EIF3C;EIF3CL	DFESHITSYKQNPEQSADEDAEKNEEDSEGS		0.892109	0.961133	0.0805879	0.141497	NaN	NaN	0.578787	-1.16844	-0.29063	-1.3059	-1.11205	-0.218418	NaN	NaN	0.183027	-1.3611	S	2	___1	eIF-3c_N	Eukaryotic translation initiation factor 3 subunit C;Eukaryotic translation initiation factor 3 subunit C-like protein		Asp/Glu-rich (acidic)			Phosphoserine							Casein kinase II substrate motif	1	8.60711e-13	203.87	182.62	163.33	-0.74594	UID373
39	Q99613;B5ME19;H3BPE4	39;39;39	Q99613	Q99613	Eukaryotic translation initiation factor 3 subunit C;Eukaryotic translation initiation factor 3 subunit C-like protein	EIF3C;EIF3CL	TKPVGGNYGKQPLLLSEDEEDTKRVVRSAKD		0.237497	0.538947	0.262068	1.25649	3.0138	2.7106	2.35643	2.2572	3.01539	3.16191	2.49461	2.45109	2.11765	2.38047	3.14275	2.35634	S	2	___1	eIF-3c_N	Eukaryotic translation initiation factor 3 subunit C;Eukaryotic translation initiation factor 3 subunit C-like protein					Phosphoserine							BARD1 BRCT domain binding motif;Casein kinase II substrate motif;G protein-coupled receptor kinase 1 substrate motif	1	8.75964e-21	249.41	228.41	247.11	0.053525	UID374
39	B7WP74;Q9HCG8	39;39	B7WP74	B7WP74	Pre-mRNA-splicing factor CWC22 homolog	CWC22	QRNSSPEDRYEEQERSPRDRDYFDYSRSDYE		0.55724	0.810062	-0.815568	-0.621322	-1.07005	-1.50701	-2.57758	NaN	-6.48514	NaN	-2.87159	-0.852398	-2.62302	-2.03049	NaN	NaN	S	2	___1		Pre-mRNA-splicing factor CWC22 homolog		Arg-rich										Casein kinase II substrate motif;ERK1,2 kinase substrate motif;Growth associated histone HI kinase substrate motif;GSK-3, ERK1, ERK2, CDK5 substrate motif;PKA kinase substrate motif;PKC kinase substrate motif;Pyruvate dehydrogenase kinase substrate motif;WW domain binding motif	1	0.0250262	91.937	67.083	91.937	1.759	UID375
46	K7EN42;B7Z8J4;P30419	46;47;47	K7EN42	K7EN42	Glycylpeptide N-tetradecanoyltransferase 1	NMT1	DCENEEDNSYNRGGLSPANDTGAKKKKKKQK		0.171472	0.439865	0.907068	1.47316	0.205595	0.144989	0.394741	0.476109	0.556519	0.73937	-3.52545	0.0299416	0.0598621	0.099205	0.319498	0.0918541	S	2	___1		Glycylpeptide N-tetradecanoyltransferase 1					Phosphoserine					In isoform Short.		ERK1,2 kinase substrate motif;GSK-3, ERK1, ERK2, CDK5 substrate motif;WW domain binding motif	1	7.88015e-08	148.04	93.976	148.04	-0.66587	UID379
85	F8WF16;B7Z8L1;F8W6A0;F8W0Q9;Q8NEY8;F8VPY7;F8VWU8	85;78;32;151;133;140;133	F8WF16	F8WF16	Periphilin-1	PPHLN1	RERSPYKRDNTFFRESPVGRKDSPHSRSGSS		0.345468	0.654082	0.230903	0.995577	1.44085	1.30086	NaN	1.15123	1.29905	1.79797	1.68599	1.19906	1.05699	0.463064	1.66319	0.934238	S	2	___1		Periphilin-1					Phosphoserine					In isoform 7.		b-Adrenergic Receptor kinase substrate motif;ERK1,2 kinase substrate motif;GSK-3, ERK1, ERK2, CDK5 substrate motif;NIMA kinase substrate motif;PKA kinase substrate motif;PKC kinase substrate motif;WW domain binding motif	1	2.60594e-37	264.31	214.11	264.31	1.1367	UID380
138	F8WF16;B7Z8L1;F8W6A0;F8W0Q9;Q8NEY8	138;150;85;223;205	F8WF16	F8WF16	Periphilin-1	PPHLN1	NKERPVQSLKTSRDTSPSSGSAVSSSKVLDK		0.293502	0.600702	0.665382	1.10872	0.190434	-0.19171	0.856676	1.21001	0.616217	0.351921	0.223347	-2.01981	1.23374	-1.7462	0.903969	0.446215	S	2	___1		Periphilin-1		Ser-rich			Phosphoserine							14-3-3 domain binding motif;Calmodulin-dependent protein kinase II substrate motif;Casein kinase II substrate motif;ERK1,2 kinase substrate motif;GSK-3, ERK1, ERK2, CDK5 substrate motif;MAPKAPK2 kinase substrate motif;PKA kinase substrate motif;PKC kinase substrate motif;WW domain binding motif	0.999992	4.49985e-12	159	89.592	159	0.057947	UID381
170	B7ZBC9;B7ZBC8;O75449	170;170;170	B7ZBC9	B7ZBC9	Katanin p60 ATPase-containing subunit A1	KATNA1	REKKEQNKGREEKNKSPAAVTEPETNKFDST		0.663992	0.851661	-0.0907651	-0.449081	-2.63099	-2.9582	-2.96358	-2.81966	-2.36874	-2.41664	-2.41459	-2.11915	-2.55594	-3.21567	-2.70565	NaN	S	2	___1		Katanin p60 ATPase-containing subunit A1					Phosphoserine		Interaction with microtubules			In isoform 2.		ERK1,2 kinase substrate motif;Growth associated histone HI kinase substrate motif;GSK-3, ERK1, ERK2, CDK5 substrate motif;PKA kinase substrate motif;PKC kinase substrate motif;WW domain binding motif	0.999966	0.0150415	78.69	58.386	78.69	2.1902	UID384
296	B7ZL14;H0Y7W6;Q96RU3	296;258;296	B7ZL14	B7ZL14	Formin-binding protein 1	FNBP1	DIEFEDYTQPMKRTVSDNSLSNSRGEGKPDL		0.534488	0.801687	-0.164262	-0.643324	-0.940199	-0.814575	-0.418671	-0.5133	-1.30217	-0.659952	-0.795816	-0.223827	-0.35615	-0.00053215	-0.788784	-1.49819	S	2	___1		Formin-binding protein 1					Phosphoserine		Interaction with microtubules;Required for self-association and induction of membrane tubulation					14-3-3 domain binding motif;AMP-activated protein kinase substrate motif;Calmodulin-dependent protein kinase I substrate motif;Calmodulin-dependent protein kinase II substrate motif;Calmodulin-dependent protein kinase IV substrate motif;Casein kinase II substrate motif;Chk1 kinase substrate motif;PKA kinase substrate motif;PKC kinase substrate motif	0.99928	0.00264596	84.718	58.045	84.718	1.1335	UID385
54	C9JCI8;E9PEK8;H7C2N6;B8ZZU6;E9PBF9;P15336	54;112;101;94;112;112	C9JCI8	C9JCI8	Cyclic AMP-dependent transcription factor ATF-2	ATF2	KKASEDDIKKMPLDLSPLATPIIRSKIEEPS		0.503305	0.77758	-0.177438	-0.700788	-2.52617	NaN	-2.28959	-2.70021	-2.10134	-1.64412	-2.10245	-2.10441	-2.13058	-2.56675	-1.47004	NaN	S	2	___1		Cyclic AMP-dependent transcription factor ATF-2					Phosphoserine					In isoform 2.;In isoform 6| isoform 8.		ERK1,2 kinase substrate motif;G protein-coupled receptor kinase 1 substrate motif;GSK-3, ERK1, ERK2, CDK5 substrate motif;WW domain binding motif	0.997939	0.0299785	52.79	44.06	52.79	0.39178	UID387
82	F8WC91;B9A018;Q53GS9	82;82;82	F8WC91	F8WC91	U4/U6.U5 tri-snRNP-associated protein 2	USP39	VPFVRVKREREVDEDSEPEREVRAKNGRVDS		0.475048	0.759392	-0.0966975	-0.742182	1.15519	1.02776	1.59696	1.64066	1.47965	1.55431	1.18299	1.44324	1.60412	1.51286	1.76276	1.52875	S	2	___1		U4/U6.U5 tri-snRNP-associated protein 2		Arg-rich			Phosphoserine					In isoform 2.		b-Adrenergic Receptor kinase substrate motif;Casein kinase I substrate motif;Casein kinase II substrate motif;G protein-coupled receptor kinase 1 substrate motif	1	2.9811e-21	279.29	236.66	193.28	-2.1665	UID391
58	H7C559;C9IZ04;Q9NY27	58;201;226	H7C559	H7C559	Serine/threonine-protein phosphatase 4 regulatory subunit 2	PPP4R2	NHSDSSTSESEVSSVSPLKNKHPDEDAVEAE		0.153461	0.420077	0.594574	1.55885	1.013	1.10513	NaN	-0.0881805	-0.0494709	0.422106	0.835812	0.279867	-0.98749	-0.631918	0.225805	-0.406412	S	2	___1	PPP4R2	Serine/threonine-protein phosphatase 4 regulatory subunit 2					Phosphoserine							Cdc2 kinase substrate motif;CDK kinase substrate motif;CDK1,2,4,6 kinase substrate motif;ERK1,2 kinase substrate motif;GSK-3, ERK1, ERK2, CDK5 substrate motif;WW domain binding motif	0.999988	2.48775e-140	426.31	389.3	363.52	0.09027	UID392
169	C9J0A7;Q9UQN3	169;199	C9J0A7	C9J0A7	Charged multivesicular body protein 2b	CHMP2B	AARSLPSASTSKATISDEEIERQLKALGVD_		0.410233	0.708577	0.21274	0.868858	-0.278305	-0.276327	0.0698109	0.13549	0.311398	0.486027	0.118269	-0.721766	0.35297	NaN	-0.301706	NaN	S	2	___1		Charged multivesicular body protein 2b					Phosphoserine							BARD1 BRCT domain binding motif;Casein kinase II substrate motif;PKA kinase substrate motif	1	8.52902e-10	193.3	173.09	153.95	0.66598	UID393
364	C9J0I9;Q86WB0	364;407	C9J0I9	C9J0I9	Nuclear-interacting partner of ALK	ZC3HC1	VPSSPLRKAKRARLCSSSSSDTSSRSFFDPT		0.232403	0.528651	0.264971	1.28044	-0.670975	-1.09458	-0.410595	-0.797932	-0.905357	-0.463253	-0.327246	-0.937286	-1.41653	-1.27711	NaN	-0.985594	S	2	___1		Nuclear-interacting partner of ALK					Phosphoserine					In isoform 3.		14-3-3 domain binding motif;Akt kinase substrate motif;Calmodulin-dependent protein kinase II substrate motif;Casein kinase II substrate motif;G protein-coupled receptor kinase 1 substrate motif;GSK3 kinase substrate motif;MAPKAPK1 kinase substrate motif;PKA kinase substrate motif;PKC kinase substrate motif	0.993433	8.15358e-05	120.14	76.624	83.204	1.8315	UID394
278	C9J0I9;Q86WB0	278;321	C9J0I9	C9J0I9	Nuclear-interacting partner of ALK	ZC3HC1	PGLEGRPERLPLVPESPRRMMTRSQDATFSP		0.492727	0.771695	0.196781	0.712024	-0.362213	-0.315874	-0.790192	-0.673143	-0.915178	-0.17584	0.281338	-0.306726	-1.07435	-1.06683	-0.885881	-1.36068	S	2	___1	Rsm1	Nuclear-interacting partner of ALK					Phosphoserine							b-Adrenergic Receptor kinase substrate motif;Cdc2 kinase substrate motif;CDK kinase substrate motif;CDK1,2,4,6 kinase substrate motif;ERK1,2 kinase substrate motif;Growth associated histone HI kinase substrate motif;GSK-3, ERK1, ERK2, CDK5 substrate motif;PKA kinase substrate motif;PKC kinase substrate motif;WW domain binding motif	1	0.000374536	110.08	70.159	55.314	-1.2694	UID395
351	C9J0I9;Q86WB0	351;394	C9J0I9	C9J0I9	Nuclear-interacting partner of ALK	ZC3HC1	TRSMGTGDTPGLEVPSSPLRKAKRARLCSSS		0.742677	0.891312	0.0783661	0.33991	1.91287	1.92296	NaN	1.73816	1.71903	1.99321	2.53299	1.9648	1.63342	1.5602	NaN	1.20298	S	2	___1		Nuclear-interacting partner of ALK										In isoform 3.		Casein kinase I substrate motif;DNA dependent Protein kinase substrate motif	0.927046	2.19361e-86	355.07	330.1	355.07	-0.45547	UID396
352	C9J0I9;Q86WB0	352;395	C9J0I9	C9J0I9	Nuclear-interacting partner of ALK	ZC3HC1	RSMGTGDTPGLEVPSSPLRKAKRARLCSSSS		0.274235	0.578192	0.259334	1.1643	1.17295	1.47875	NaN	0.400499	1.22787	1.38462	0.801115	0.963089	0.730114	0.915276	1.3896	0.442438	S	2	___1		Nuclear-interacting partner of ALK					Phosphoserine					In isoform 3.		Cdc2 kinase substrate motif;CDK kinase substrate motif;CDK1,2,4,6 kinase substrate motif;ERK1,2 kinase substrate motif;Growth associated histone HI kinase substrate motif;GSK-3, ERK1, ERK2, CDK5 substrate motif;MDC1 BRCT domain binding motif;Plk1 PBD domain binding motif;WW domain binding motif	0.909061	6.41436e-50	284.84	259.62	127.37	-1.1775	UID397	CDK1
292	C9J0I9;Q86WB0	292;335	C9J0I9	C9J0I9	Nuclear-interacting partner of ALK	ZC3HC1	ESPRRMMTRSQDATFSPGSEQAEKSPGPIVS		0.312106	0.618596	0.23136	1.06456	-0.361662	-0.270721	0.162052	0.0412579	-0.20439	0.326136	0.441746	0.0275764	-0.264315	-0.642683	-0.453142	-0.804672	S	2	___1	Rsm1	Nuclear-interacting partner of ALK					Phosphoserine							Casein kinase II substrate motif;ERK1,2 kinase substrate motif;GSK-3, ERK1, ERK2, CDK5 substrate motif;WW domain binding motif	0.999733	4.65747e-52	323.77	266.66	323.77	0.19572	UID398
301	C9J0I9;Q86WB0	301;344	C9J0I9	C9J0I9	Nuclear-interacting partner of ALK	ZC3HC1	SQDATFSPGSEQAEKSPGPIVSRTRSWDSSS		0.544991	0.808646	0.147422	0.62655	1.4705	1.40893	0.630285	1.01619	0.995739	1.25926	1.5256	1.61978	0.819368	0.484869	0.550039	0.896708	S	3	___1	Rsm1	Nuclear-interacting partner of ALK					Phosphoserine					In isoform 3.		ERK1,2 kinase substrate motif;Growth associated histone HI kinase substrate motif;GSK-3, ERK1, ERK2, CDK5 substrate motif;WW domain binding motif	0.99183	1.70338e-19	174.89	145.42	142.32	1.071	UID399
311	C9J0I9;Q86WB0	311;354	C9J0I9	C9J0I9	Nuclear-interacting partner of ALK	ZC3HC1	EQAEKSPGPIVSRTRSWDSSSPVDRPEPEAA		0.0528776	0.23604	-0.633319	-2.27016	0.645449	0.564196	NaN	-0.27014	-0.406172	-0.544107	0.975658	0.50839	0.860035	0.404068	0.407671	NaN	S	3	___1		Nuclear-interacting partner of ALK					Phosphoserine	Strongly reduces phosphorylation and induces the formation of a constitutive SCF(NIPA) E3 complex that degrades CCNB1 at G2/M phase and delays mitotic entry				In isoform 3.		14-3-3 domain binding motif;Calmodulin-dependent protein kinase II substrate motif;Calmodulin-dependent protein kinase IV substrate motif;Casein kinase II substrate motif;Chk1 kinase substrate motif;G protein-coupled receptor kinase 1 substrate motif;GSK3 kinase substrate motif;MAPKAPK2 kinase substrate motif;PKA kinase substrate motif;PKC kinase substrate motif	0.999962	2.22233e-06	117.08	103.52	117.08	-1.1912	UID400
2248	C9JE98;C9J0Q5;C9JFD3;Q9Y618;C9J7T7;H7C184	2248;2248;2258;2269;1806;49	C9JE98	C9JE98	Nuclear receptor corepressor 2	NCOR2	YRDGEQTEPSRMGSKSPGNTSQPPAFFSKLT		0.105069	0.351438	-0.321594	-1.82731	-1.41251	NaN	-1.50888	-1.66564	-1.45994	-1.62093	-0.652386	-1.17992	-1.66353	-1.13068	-1.4334	NaN	S	2	___1		Nuclear receptor corepressor 2					Phosphoserine							ERK1,2 kinase substrate motif;G protein-coupled receptor kinase 1 substrate motif;Growth associated histone HI kinase substrate motif;GSK-3, ERK1, ERK2, CDK5 substrate motif;WW domain binding motif	0.999566	0.000907079	87.498	74.938	87.498	-0.64113	UID404
594	C9J185;E7ER02;Q9NZJ5	594;564;715	C9J185	C9J185	Eukaryotic translation initiation factor 2-alpha kinase 3	EIF2AK3	MDPFATKEHIEIIAPSPQRSRSFSVGISCDQ		0.143438	0.407661	0.572276	1.64754	NaN	-1.44744	-2.61264	-2.3872	-2.03862	-2.16098	NaN	-1.80322	-3.09018	-3.04148	-2.87172	NaN	S	2	___1		Eukaryotic translation initiation factor 2-alpha kinase 3				Protein kinase	Phosphoserine						Cytoplasmic	Cdc2 kinase substrate motif;CDK kinase substrate motif;CDK1,2,4,6 kinase substrate motif;DNA dependent Protein kinase substrate motif;ERK1,2 kinase substrate motif;G protein-coupled receptor kinase 1 substrate motif;GSK3 kinase substrate motif;GSK-3, ERK1, ERK2, CDK5 substrate motif;WW domain binding motif	1	1.117e-08	140.82	110.62	107.37	3.2494	UID405
53	C9J542;P50479	53;112	C9J542	C9J542	PDZ and LIM domain protein 4	PDLIM4	AQAHRIHIDPEIQDGSPTTSRRPSGTGTGPE		0.205225	0.489824	-0.366092	-1.37898	-2.58147	NaN	-1.61517	-2.31878	-1.19843	-1.7725	NaN	-1.62308	-1.31202	-1.67119	-1.75294	-1.29666	S	2	___1		PDZ and LIM domain protein 4					Phosphoserine							Casein kinase II substrate motif;ERK1,2 kinase substrate motif;G protein-coupled receptor kinase 1 substrate motif;GSK3 kinase substrate motif;GSK-3, ERK1, ERK2, CDK5 substrate motif;WW domain binding motif	0.925602	0.00335018	65.704	44.241	65.704	0.9701	UID409
45	H7BXQ8;C9J5N7;Q8N2F6	45;45;45	H7BXQ8	H7BXQ8	Armadillo repeat-containing protein 10	ARMC10	GRRRGDRELGIRSSKSAGALEEGTSEGQLCG		0.0666979	0.264622	0.270822	2.16918	-1.34469	-1.33294	-1.41449	-1.16762	-1.30404	NaN	-1.75148	NaN	-1.84141	-1.26057	-1.48085	NaN	S	2	___1		Armadillo repeat-containing protein 10					Phosphoserine							AMP-activated protein kinase substrate motif	1	4.68725e-13	151.9	118.04	151.9	-2.2164	UID410
275	C9J6P4;Q7Z2W4	275;275	C9J6P4	C9J6P4	Zinc finger CCCH-type antiviral protein 1	ZC3HAV1	FLASASASAERSCTPSPDQISHRASLEDAPV		0.725468	0.884569	0.0939074	0.361194	-1.50151	-1.19736	-1.76732	-1.67316	-1.17645	-1.26877	-0.663189	-1.11617	-2.13804	-1.89214	-1.32042	-2.01806	S	2	___1		Zinc finger CCCH-type antiviral protein 1					Phosphoserine					In isoform 4| isoform 5.		DNA dependent Protein kinase substrate motif;ERK1,2 kinase substrate motif;GSK-3, ERK1, ERK2, CDK5 substrate motif;MAPKAPK2 kinase substrate motif;WW domain binding motif	0.999919	0.00989044	89.959	70.688	77.912	-1.2464	UID412
378	C9J6P4;Q7Z2W4	378;378	C9J6P4	C9J6P4	Zinc finger CCCH-type antiviral protein 1	ZC3HAV1	TSWTNDQGARRKTVFSPTLPAARSSLGSLQT		0.13209	0.392429	0.362008	1.65607	-0.842882	-0.586123	-0.877777	-0.558657	-0.2365	-0.106081	-0.28397	-0.83276	-1.3102	-1.25097	-0.805489	NaN	S	2	___1		Zinc finger CCCH-type antiviral protein 1					Phosphoserine					In isoform 4| isoform 5.		Casein kinase II substrate motif;ERK1,2 kinase substrate motif;G protein-coupled receptor kinase 1 substrate motif;GSK-3, ERK1, ERK2, CDK5 substrate motif;PKA kinase substrate motif;WW domain binding motif	0.999699	1.8048e-07	161.93	111.58	161.93	-0.21319	UID413
202	C9J813;E9PGZ1	202;196	C9J813	C9J813		CALD1	DKEKEEEEEEKPKRGSIGENQIKDEKIKKDK		0.0686031	0.268966	-0.439608	-2.10313	-1.10713	-1.38307	-0.923307	-1.20193	-0.516808	-0.652275	-0.523577	-0.962383	NaN	NaN	-0.298557	-0.313396	S	3	___1	Caldesmon													Aurora-A kinase substrate motif;Casein kinase II substrate motif;PAK2 kinase substrate motif;Phosphorylase kinase substrate motif;PKA kinase substrate motif;PKC kinase substrate motif	1	8.81298e-12	186.98	149.21	153.82	1.5459	UID414
11	C9JA28;Q9UNL2	11;11	C9JA28	C9JA28	Translocon-associated protein subunit gamma	SSR3	_____MAPKGSSKQQSEEDLLLQDFSRNLSA		0.00531517	0.0779718	0.423658	3.65029	-0.579142	-0.576706	-0.248159	-0.152601	-0.515842	-0.292145	-1.13716	-0.811754	-0.701906	-0.826738	-0.611225	NaN	S	2	___1		Translocon-associated protein subunit gamma					Phosphoserine						Lumenal	Casein kinase II substrate motif;G protein-coupled receptor kinase 1 substrate motif;MAPKAPK2 kinase substrate motif;PKA kinase substrate motif;PKC kinase substrate motif;Pyruvate dehydrogenase kinase substrate motif	1	0.000186098	102.28	58.286	102.28	-1.1922	UID416
794	C9JA69;Q8WY36	794;844	C9JA69	C9JA69	HMG box transcription factor BBX	BBX	KTKITHLVRTADGRVSPAGGTLDDKPKEQLQ		0.595702	0.828659	0.173266	0.550002	-0.849831	-1.00632	-1.65136	-1.46443	-0.251774	-0.249851	NaN	-1.33912	-1.46838	-1.19193	-0.398741	-1.02946	S	2	___1		HMG box transcription factor BBX					Phosphoserine					In isoform 3.		ERK1,2 kinase substrate motif;GSK-3, ERK1, ERK2, CDK5 substrate motif;PKA kinase substrate motif;PKC kinase substrate motif;WW domain binding motif	1	3.98839e-11	153.14	114.46	153.14	1.1714	UID417
126	C9JAT7;O94888	126;288	C9JAT7	C9JAT7	UBX domain-containing protein 7	UBXN7	KKCARSESLIDASEDSQLEAAIRASLQETHF		0.576012	0.824648	-0.0660043	-0.591126	NaN	NaN	-0.389187	-0.646692	-0.736811	-0.441547	-0.701435	NaN	-0.46627	-0.352221	-0.430294	NaN	S	2	___1		UBX domain-containing protein 7				UIM	Phosphoserine	No effect on interactions with CUL2 and HIF1A						ATM kinase substrate motif;b-Adrenergic Receptor kinase substrate motif;Casein kinase II substrate motif;DNA dependent Protein kinase substrate motif;G protein-coupled receptor kinase 1 substrate motif	0.984161	6.45884e-19	176.33	160.44	176.33	-1.1199	UID418
169	C9JFM5;Q12846	169;117	C9JFM5	C9JFM5	Syntaxin-4	STX4	KAIEPQKEEADENYNSVNTRMR_________		0.128875	0.386753	0.31758	1.65525	1.38266	1.29236	0.795008	1.23756	1.2599	1.00637	0.749153	1.08111	0.966211	1.21305	1.00388	0.0549831	S	3	___1	Syntaxin	Syntaxin-4	+				Phosphoserine						Cytoplasmic	Casein kinase II substrate motif	0.998137	3.07091e-13	165.4	129.97	152.41	-0.50641	UID419
334	E7EV54;C9JFV4;Q8IZL8	334;531;481	E7EV54	E7EV54	Proline-, glutamic acid- and leucine-rich protein 1	PELP1	ISPPADALKLRSPRGSPDGSLQTGKPSAPKK		0.949816	0.985981	0.0144058	0.0647138	1.41206	1.04516	1.59793	1.63752	1.79435	2.24835	2.08372	1.72459	1.30185	1.31982	1.61078	NaN	S	2	___1	NUC202	Proline-| glutamic acid- and leucine-rich protein 1					Phosphoserine							ERK1,2 kinase substrate motif;G protein-coupled receptor kinase 1 substrate motif;GSK3 kinase substrate motif;GSK-3, ERK1, ERK2, CDK5 substrate motif;MAPKAPK2 kinase substrate motif;PKA kinase substrate motif;PKC kinase substrate motif;WW domain binding motif	1	7.38937e-42	286.85	238.93	286.85	-1.4127	UID420
488	C9JG86;Q9BYW2;H7BZ93;H7BXT4;H7C3H4	488;532;250;404;166	C9JG86	C9JG86	Histone-lysine N-methyltransferase SETD2	SETD2	ESKRTSENEAIKRCCSPPNELGFRRGSSYSK		0.621364	0.834362	-0.0851543	-0.511424	-1.07595	-1.32919	-1.3728	-1.21747	-0.942617	-1.01742	-0.472054	-1.01205	-1.35419	-1.19477	-1.33737	NaN	S	2	___1		Histone-lysine N-methyltransferase SETD2												14-3-3 domain binding motif;Calmodulin-dependent protein kinase II substrate motif;Calmodulin-dependent protein kinase IV substrate motif;Chk1 kinase substrate motif;ERK1,2 kinase substrate motif;GSK-3, ERK1, ERK2, CDK5 substrate motif;PKA kinase substrate motif;PKC kinase substrate motif;WW domain binding motif	1	0.00180348	91.937	85.834	47.823	-2.025	UID421
580	C9JG86;Q9BYW2;H7BZ93;H7BXT4;H7C3H4	580;624;342;496;258	C9JG86	C9JG86	Histone-lysine N-methyltransferase SETD2	SETD2	REKAGSPAPSNRLNDSPTLKKLDELPIFKSE		0.699459	0.87378	0.0871499	0.39735	-0.541149	-0.399363	-0.923502	-0.51173	0.00651932	-0.245407	-0.812433	0.272562	-0.729166	-0.407799	-0.510403	-0.950293	S	2	___1		Histone-lysine N-methyltransferase SETD2					Phosphoserine							b-Adrenergic Receptor kinase substrate motif;Casein kinase II substrate motif;ERK1,2 kinase substrate motif;GSK-3, ERK1, ERK2, CDK5 substrate motif;WW domain binding motif	0.999886	0.00014902	175.41	108.42	174.98	0.35252	UID422
39	C9JPX5;C9JKL2;O95772;C9JJ39;C9J3F5	39;39;39;39;39	C9JPX5	C9JPX5	MLN64 N-terminal domain homolog	STARD3NL	NIHSINPTQLMARIESYEGREKKGISDVRRT		0.750712	0.896839	-0.155144	-0.326588	-2.78133	-3.15915	-1.91248	-0.941801	-1.55122	-1.7696	-2.67457	-2.95323	-1.29225	-0.916676	-1.28909	-2.0589	S	2	___1		MLN64 N-terminal domain homolog											Cytoplasmic	14-3-3 domain binding motif;b-Adrenergic Receptor kinase substrate motif;Calmodulin-dependent protein kinase II alpha substrate motif;Calmodulin-dependent protein kinase II substrate motif;Calmodulin-dependent protein kinase IV substrate motif;Casein kinase II substrate motif;Chk1 kinase substrate motif;PKA kinase substrate motif;PKC kinase substrate motif	0.999857	0.00314821	97.431	36.994	97.431	-0.68062	UID427
193	C9JPX5;C9JKL2;O95772	193;175;193	C9JPX5	C9JPX5	MLN64 N-terminal domain homolog	STARD3NL	QEAEEENRLLIVQDASERAALIPGGLSDG__		0.605419	0.833378	0.283093	0.533385	0.446877	0.30937	-0.156828	0.486177	0.236109	0.862078	0.582447	0.588629	0.363453	0.546152	0.866713	-2.46217	S	2	___1	MENTAL	MLN64 N-terminal domain homolog				MENTAL	Phosphoserine						Cytoplasmic	G protein-coupled receptor kinase 1 substrate motif;PKA kinase substrate motif;PKC kinase substrate motif	1	2.56315e-06	209.19	148.79	110.08	-0.18904	UID428
427	C9JME2;Q9Y4F1;A0A1B0GV68	427;427;427	C9JME2	C9JME2	FERM, RhoGEF and pleckstrin domain-containing protein 1	FARP1	GKEPKVSAGEPGSHPSPAPRRSPAGNKQADG	+	0.000914279	0.0412	-0.791188	-4.8453	-0.35231	-0.482647	-0.679058	-0.276564	-0.210667	-0.237961	0.839983	NaN	0.174614	0.120094	0.76161	0.193636	S	2	___1		FERM| RhoGEF and pleckstrin domain-containing protein 1					Phosphoserine					In isoform 3.		DNA dependent Protein kinase substrate motif;ERK1,2 kinase substrate motif;GSK-3, ERK1, ERK2, CDK5 substrate motif;WW domain binding motif	0.999987	2.67243e-41	287.03	242.84	255.21	3.1875	UID431
151	C9JNP9;Q92890	151;247	C9JNP9	C9JNP9	Ubiquitin fusion degradation protein 1 homolog	UFD1L	GNRLDGKKKGVEPSPSPIKPGDIK_______		0.0547661	0.23742	0.456267	2.2064	-1.9605	-1.49788	-2.37925	-1.89374	-1.49645	-1.46458	-1.88325	-2.08796	-2.65254	-2.45881	-2.10912	NaN	S	2	___1		Ubiquitin fusion degradation protein 1 homolog					Phosphoserine							Cdc2 kinase substrate motif;CDK kinase substrate motif;CDK1,2,4,6 kinase substrate motif;DNA dependent Protein kinase substrate motif;ERK1,2 kinase substrate motif;G protein-coupled receptor kinase 1 substrate motif;GSK-3, ERK1, ERK2, CDK5 substrate motif;WW domain binding motif	0.990494	0.00202874	77.527	62.383	77.527	1.3664	UID432
702	C9JPC9;Q9H9J4	702;856	C9JPC9	C9JPC9	Ubiquitin carboxyl-terminal hydrolase 42	USP42	EGPRDSALAEAPEGLSPAPPARSEEPCEQPL		0.744525	0.890836	-0.0566747	-0.339037	-0.467346	NaN	-0.695763	-0.458538	-0.392553	-0.320724	-0.0676041	NaN	-0.631903	-0.772074	-0.169661	NaN	S	2	___1		Ubiquitin carboxyl-terminal hydrolase 42		Pro-rich			Phosphoserine							Casein kinase I substrate motif;ERK1,2 kinase substrate motif;G protein-coupled receptor kinase 1 substrate motif;GSK-3, ERK1, ERK2, CDK5 substrate motif;WW domain binding motif	1	4.84575e-13	158.64	135.26	158.64	-0.45188	UID433
175	C9JQV0;Q9BRJ6;H7C0T1;H7C2R9	175;175;143;160	C9JQV0	C9JQV0	Uncharacterized protein C7orf50	C7orf50	VQKAEALMRELDEEGSDPPLPGRAQRIRQVL		0.0304692	0.178971	-0.215094	-2.56434	0.206837	0.285316	0.214817	0.47624	0.242891	0.451338	0.594553	0.588011	0.288601	0.464821	0.704018	NaN	S	2	___1		Uncharacterized protein C7orf50					Phosphoserine							Casein kinase I substrate motif	1	3.81498e-35	283.82	249.08	249.33	0.37012	UID434
761	C9JQV3;Q8N1F8	761;772	C9JQV3	C9JQV3	Serine/threonine-protein kinase 11-interacting protein	STK11IP	CHPPGHGDHLDRAKNSPPQAPSTRDHGSWSL		0.0647164	0.260412	-0.722533	-2.0752	0.845848	0.434427	0.777889	0.0115623	1.16079	-0.837006	1.1804	1.77049	0.800465	0.521019	1.47624	0.980097	S	2	___1		Serine/threonine-protein kinase 11-interacting protein					Phosphoserine					In isoform 2.		ERK1,2 kinase substrate motif;G protein-coupled receptor kinase 1 substrate motif;GSK-3, ERK1, ERK2, CDK5 substrate motif;PKA kinase substrate motif;PKC kinase substrate motif;WW domain binding motif	1	0.000963613	122.1	101.67	122.1	2.4739	UID436
387	C9JQV3;Q8N1F8	387;398	C9JQV3	C9JQV3	Serine/threonine-protein kinase 11-interacting protein	STK11IP	PLLHKVKSRVRVRRASISEPSDTDPEPRTLN		0.524704	0.791595	-0.121927	-0.659121	1.05305	1.03125	0.717684	1.24204	1.38561	1.58134	1.84325	1.27438	1.02316	1.10155	1.52576	0.974455	S	2	___1		Serine/threonine-protein kinase 11-interacting protein					Phosphoserine							14-3-3 domain binding motif;Akt kinase substrate motif;Aurora-A kinase substrate motif;Calmodulin-dependent protein kinase II substrate motif;Casein kinase II substrate motif;DMPK1 kinase substrate motif;G protein-coupled receptor kinase 1 substrate motif;MAPKAPK1 kinase substrate motif;p70 Ribosomal S6 kinase substrate motif;PAK2 kinase substrate motif;Phosphorylase kinase substrate motif;PKA ki…	1	2.10504e-26	255.21	219.79	255.21	0.05959	UID437
84	C9JRP1;Q9Y6M7;A0A0A0MST8;E9PFN4	84;84;80;93	C9JRP1;E9PFN4	C9JRP1	Anion exchange protein;Sodium bicarbonate cotransporter 3	SLC4A7	RRRKDKESDKEDGRESPSYDTPSQRVQFILG		0.459291	0.743389	0.142601	0.769669	1.33528	1.53626	1.17341	1.49974	1.89262	1.57749	0.99366	1.14523	1.79688	1.4663	1.79774	0.9594	S	3	___1		Sodium bicarbonate cotransporter 3										In isoform 3| isoform 4.;In isoform 5.	Extracellular	b-Adrenergic Receptor kinase substrate motif;Casein kinase II substrate motif;ERK1,2 kinase substrate motif;GSK-3, ERK1, ERK2, CDK5 substrate motif;PKA kinase substrate motif;PKC kinase substrate motif;WW domain binding motif	0.999978	1.34918e-19	191.99	170.76	160.77	0.44668	UID440
258	C9JRP1	258	C9JRP1	C9JRP1	Anion exchange protein	SLC4A7	DPHLLERNGILASPQSAPGNLDNSKSGEIKG		0.0706388	0.272544	0.265772	2.08432	-0.589121	-0.684761	-0.624763	-0.721992	-0.490517	-0.485456	-0.629276	-0.715046	NaN	-1.29439	-0.822117	NaN	S	2	___1	Band_3_cyto														0.999144	2.32447e-06	118.53	102.13	118.53	-0.67427	UID442
233	C9JRP1;Q9Y6M7;F8WDX9;E7EW28;C9J240;Q6U841	233;233;238;238;238;238	C9JRP1	C9JRP1	Anion exchange protein;Sodium bicarbonate cotransporter 3;Sodium-driven chloride bicarbonate exchanger	SLC4A7;SLC4A10	HQNEKRFTSRIPLVRSFADIGKKHSDPHLLE		0.178589	0.451597	0.443039	1.47446	-0.58568	-0.329336	-1.6353	-0.742598	-1.2799	-0.874964	-1.43617	-0.696379	-1.65909	NaN	-1.61237	NaN	S	1	___1	Band_3_cyto	Sodium bicarbonate cotransporter 3;Sodium-driven chloride bicarbonate exchanger					Phosphoserine					In isoform 5.	Cytoplasmic;Extracellular	Casein kinase II substrate motif;Pyruvate dehydrogenase kinase substrate motif	1	0.00542976	86.67	16.859	74.92	0.76881	UID443
50	C9JRZ6;Q9NX63;F8WAR4	50;50;50	C9JRZ6	C9JRZ6	MICOS complex subunit MIC19	CHCHD3	RMKESSPSGSKSQRYSGAYGASVSDEELKRR		0.58277	0.828541	0.145287	0.567683	2.44119	2.46474	1.98043	2.56474	2.22109	2.65435	2.66176	2.54345	2.13652	2.50564	2.485	1.12246	S	2	___1	DUF737	MICOS complex subunit MIC19					Phosphoserine							Casein kinase II substrate motif;MAPKAPK2 kinase substrate motif;PKA kinase substrate motif;PKC kinase substrate motif	1	2.78523e-26	239.51	214.06	239.51	-0.92822	UID444
96	C9JSU1;Q9Y608	96;328	C9JSU1	C9JSU1	Leucine-rich repeat flightless-interacting protein 2	LRRFIP2	ASATTPLSGNSSRRGSGDTSSLIDPDTSLSE		0.698812	0.873582	0.0705004	0.398255	1.45698	1.51359	0.904587	0.839533	1.21104	1.51367	1.05723	1.6019	1.07551	1.23196	1.35311	0.696682	S	2	___1	DUF2051	Leucine-rich repeat flightless-interacting protein 2		Ser-rich			Phosphoserine		DVL3-binding			In isoform 3.		14-3-3 domain binding motif;Calmodulin-dependent protein kinase II substrate motif;Casein kinase II substrate motif;G protein-coupled receptor kinase 1 substrate motif;GSK3 kinase substrate motif;MAPKAPK2 kinase substrate motif;PAK2 kinase substrate motif;PKA kinase substrate motif;PKC epsilon kinase substrate motif;PKC kinase substrate motif	0.999995	1.32391e-18	181.4	140.67	180.05	1.618	UID445
50	C9JTT8;Q68DU7;H7C1N3;O15155	50;50;65;50	C9JTT8	C9JTT8	BET1 homolog	BET1;DKFZp781C0425	LTESLRSKVTAIKSLSIEIGHEVKTQNKLLA		0.325615	0.629026	0.295769	1.03373	3.2071	3.13277	2.27824	2.53974	2.75668	3.13632	3.40184	3.0558	2.0742	2.39955	2.50369	1.84116	S	2	___1		BET1 homolog				t-SNARE coiled-coil homology	Phosphoserine						Cytoplasmic	Casein kinase II substrate motif;Phosphorylase kinase substrate motif;PKA kinase substrate motif;PKC kinase substrate motif	1	9.72414e-11	219.74	141.19	199.4	-0.10872	UID446
11	C9JW69;P18754;C9JRH2;C9JMJ4;C9J3R0;C9JQZ4;M0R1Q8	11;11;11;11;19;11;113	C9JW69	C9JW69	Regulator of chromosome condensation	RCC1	_____MSPKRIAKRRSPPADAIPKSKKVKDT		0.200866	0.483031	0.461028	1.36931	1.04707	1.25767	0.534735	0.261129	0.264103	0.639288	1.1319	0.824453	0.203047	-0.836847	0.193619	-0.278341	S	2	___1		Regulator of chromosome condensation					Phosphoserine							Calmodulin-dependent protein kinase II substrate motif;Chk1 kinase substrate motif;ERK1,2 kinase substrate motif;Growth associated histone HI kinase substrate motif;GSK-3, ERK1, ERK2, CDK5 substrate motif;PAK2 kinase substrate motif;PKA kinase substrate motif;PKC kinase substrate motif;WW domain binding motif	1	0.000349789	97.957	62.599	89.171	0.31641	UID447	CDK1
388	C9JWC4;Q8NCD3	388;473	C9JWC4	C9JWC4	Holliday junction recognition protein	HJURP	LPDSWAMNMYRGGPASPGGLQGLETRRLSLP		0.308816	0.61773	-0.162347	-1.0973	-1.46296	-1.56431	-1.47959	NaN	-1.09776	-1.15208	-0.942083	-1.17195	-1.50283	NaN	-1.1391	NaN	S	2	___1		Holliday junction recognition protein					Phosphoserine							ERK1,2 kinase substrate motif;GSK-3, ERK1, ERK2, CDK5 substrate motif;WW domain binding motif	1	4.54342e-05	104.41	85.684	104.41	0.233	UID448
349	C9JZR2;O60716;E9PKY0	349;349;26	C9JZR2	C9JZR2	Catenin delta-1	CTNND1	YYWAPLAQHERGSLASLDSLRKGGPPPPNWR		0.0847757	0.308758	-0.344455	-1.93656	-0.877575	-0.858805	-0.807882	-0.467043	-0.416878	-0.210686	0.26729	-0.365376	-0.383436	-0.282352	-0.546242	NaN	S	2	___1		Catenin delta-1					Phosphoserine							Casein kinase II substrate motif	1	2.35006e-08	201.09	146.82	190.34	-0.062925	UID449
352	C9JZR2;O60716;E9PKY0	352;352;29	C9JZR2	C9JZR2	Catenin delta-1	CTNND1	APLAQHERGSLASLDSLRKGGPPPPNWRQPE		0.106405	0.350607	-0.62022	-1.77431	-0.433601	-1.04175	-1.26571	-1.59764	-0.389734	-0.318649	0.87915	-0.420286	-0.892403	-0.861141	0.116714	-0.147799	S	2	___1		Catenin delta-1					Phosphoserine							b-Adrenergic Receptor kinase substrate motif;PKA kinase substrate motif;PKC kinase substrate motif	1	2.34191e-08	210.64	160.86	201.09	0.079811	UID450
230	C9JZR2;O60716;E9PRE2	230;230;152	C9JZR2	C9JZR2	Catenin delta-1	CTNND1	RHYEDGYPGGSDNYGSLSRVTRIEERYRPSM		0.796929	0.918461	-0.0451911	-0.264283	0.431992	0.213863	-0.239464	-0.229458	0.142313	-0.134886	0.360634	0.299557	0.0557938	0.133854	0.133034	-0.527365	S	2	___1		Catenin delta-1					Phosphoserine					In isoform 4ABC| isoform 4AB| isoform 4AC| isoform 4BC| isoform 4A| isoform 4B| isoform 4C| isoform 4.		Casein kinase II substrate motif	0.994408	3.92014e-50	284.07	246.49	188.41	0.36919	UID451
268	C9JZR2;O60716;E9PRE2	268;268;190	C9JZR2	C9JZR2	Catenin delta-1	CTNND1	RQDVYGPQPQVRVGGSSVDLHRFHPEPYGLE		0.932024	0.975764	0.0200996	0.0874716	0.700974	0.935005	0.145203	0.375942	0.95916	1.02783	0.854292	1.21879	0.123753	0.432663	1.05096	0.343056	S	2	___1		Catenin delta-1					Phosphoserine					In isoform 4ABC| isoform 4AB| isoform 4AC| isoform 4BC| isoform 4A| isoform 4B| isoform 4C| isoform 4.		AMP-activated protein kinase substrate motif;Casein kinase II substrate motif;Pyruvate dehydrogenase kinase substrate motif	0.999165	1.59572e-06	212.09	186.85	212.09	1.1837	UID452	CK1E;PKCE
227	C9K0K7;I3L0S1;E7EPA1;O60256	227;83;227;227	C9K0K7	C9K0K7	Phosphoribosyl pyrophosphate synthase-associated protein 2	PRPSAP2	GEAQDAESDLVDGRHSPPMVRSVAAIHPSLE		0.333208	0.638783	-1.40122	-1.05224	-0.912315	0.203257	NaN	-4.79824	1.04447	NaN	-0.118353	-0.412359	NaN	NaN	0.920353	0.75242	S	4	___1	Pribosyl_synth	Phosphoribosyl pyrophosphate synthase-associated protein 2					Phosphoserine							AMP-activated protein kinase substrate motif;ERK1,2 kinase substrate motif;GSK-3, ERK1, ERK2, CDK5 substrate motif;PKA kinase substrate motif;PKC kinase substrate motif;WW domain binding motif	0.999969	1.93894e-22	190.14	163.81	134.17	-0.14925	UID454
395	H0Y3P2;D3DQV9;P78344;H0YCH5	395;395;395;395	H0Y3P2	H0Y3P2	Eukaryotic translation initiation factor 4 gamma 2	EIF4G2	GSGIGTGPGVIQDRFSPTMGRHRSNQLFNGH		0.0760172	0.287946	-1.03307	-1.97886	-1.01895	-1.35649	-1.3415	-2.6164	-0.814875	-3.91126	0.0125141	-0.779642	-1.29184	-1.06981	-0.650896	-1.08138	S	2	___1		Eukaryotic translation initiation factor 4 gamma 2					Phosphoserine							Casein kinase I substrate motif;Casein kinase II substrate motif;ERK1,2 kinase substrate motif;GSK-3, ERK1, ERK2, CDK5 substrate motif;PKA kinase substrate motif;PKC kinase substrate motif;WW domain binding motif	0.999997	0.00449717	91.069	66.249	91.069	-0.48587	UID455
466	D6RB01;Q9Y6X4	466;526	D6RB01	D6RB01	Soluble lamin-associated protein of 75 kDa	FAM169A	EEKLSLLPRKKAHLGSSDNVATMSNEERSDG		0.0867948	0.309146	0.551833	1.89879	-1.92904	-1.78421	-1.37493	-1.13666	-0.141119	-0.840406	-1.64725	-1.81315	-2.26953	-1.49223	-1.60239	-1.69281	S	3	___1		Soluble lamin-associated protein of 75 kDa										In isoform 2.			0.87134	3.07357e-06	113.17	99.059	113.17	-0.22589	UID460
575	D6RB01;Q9Y6X4	575;635	D6RB01	D6RB01	Soluble lamin-associated protein of 75 kDa	FAM169A	EQLDQFTQSAEKAVDSSSEEIEVEVPVVDRR		0.506745	0.777574	0.191439	0.699613	NaN	NaN	0.112898	0.00816345	-0.0859089	0.0429325	-0.95372	-0.432592	-0.085331	0.287155	0.324898	NaN	S	2	___1		Soluble lamin-associated protein of 75 kDa					Phosphoserine					In isoform 2.		b-Adrenergic Receptor kinase substrate motif;Casein kinase II substrate motif;PKA kinase substrate motif	0.995584	7.93795e-73	334.46	307.25	334.46	0.51284	UID461
73	D6RB22;D6RJE6;P49590	73;73;67	D6RB22	D6RB22	Probable histidine--tRNA ligase, mitochondrial	HARS2	KPNFIIKTPKGTRDLSPQHMVVREKILDLVI		0.375574	0.684032	0.293035	0.927373	-0.51483	-0.146832	-1.48792	-0.887215	-0.970673	-0.526457	-1.2646	-1.11148	-1.54927	-1.35008	-1.19338	0.176678	S	2	___1	tRNA-synt_His	Probable histidine--tRNA ligase| mitochondrial					Phosphoserine							14-3-3 domain binding motif;Calmodulin-dependent protein kinase II substrate motif;ERK1,2 kinase substrate motif;GSK-3, ERK1, ERK2, CDK5 substrate motif;PKA kinase substrate motif;PKC kinase substrate motif;WW domain binding motif	1	0.000932489	102.52	59.78	83	0.4161	UID462
799	D6RHZ5;D6REX3;O94979;H0YAB3;H7BXG7	799;799;799;416;532	D6RHZ5	D6RHZ5	Protein transport protein Sec31A	SEC31A	DRLCRAQGEPVAGHESPKIPYEKQQLPKGRP		0.711251	0.882294	-0.128919	-0.383625	-2.26774	-2.08645	NaN	-0.824194	-0.749578	-1.55076	-1.41538	-1.21669	-1.28811	NaN	-1.09945	-1.8145	S	2	___1		Protein transport protein Sec31A					Phosphoserine					In isoform 5.		b-Adrenergic Receptor kinase substrate motif;ERK1,2 kinase substrate motif;G protein-coupled receptor kinase 1 substrate motif;Growth associated histone HI kinase substrate motif;GSK-3, ERK1, ERK2, CDK5 substrate motif;PKA kinase substrate motif;PKC kinase substrate motif;WW domain binding motif	1	0.032729	44.616	32.39	44.616	2.7973	UID464
527	D6RHZ5;D6REX3;O94979;H0Y8V7	527;527;527;115	D6RHZ5	D6RHZ5	Protein transport protein Sec31A	SEC31A	DGANVALKDSDQVAQSDGEESPAAEEQLLGE		0.827141	0.933433	-0.0711137	-0.226692	-1.26684	-1.19802	-0.577869	NaN	-0.728197	NaN	-1.3947	-1.38457	-0.0889301	-0.748129	-0.74177	NaN	S	3	___1		Protein transport protein Sec31A					Phosphoserine					In isoform 4| isoform 6| isoform 7| isoform 10.;In isoform 5.		Casein kinase II substrate motif	0.826062	2.25072e-06	90.468	76.737	90.468	-0.8723	UID465
290	D6RIY6;Q06265	290;306	D6RIY6	D6RIY6	Exosome complex component RRP45	EXOSC9	QRITAFKMEKAPIDTSDVEEKAEEIIAEAEP		0.0507533	0.232681	0.213229	2.21932	1.4166	1.67733	1.51782	1.70112	1.66424	1.83359	1.57103	1.3075	1.67309	1.21603	1.49371	1.26996	S	2	___1		Exosome complex component RRP45					Phosphoserine							Casein kinase II substrate motif	0.995858	8.28536e-21	262.15	216.27	240.65	-0.12301	UID466
75	E5RFP7;E5RIE3;E5RFE4;Q56NI9	75;75;75;75	E5RFP7	E5RFP7	N-acetyltransferase ESCO2	ESCO2	LKTTEINRLPSANQGSPFKSALSTVSFYNQN	+	0.000967781	0.0411429	-0.659402	-4.80439	-1.70052	-2.06153	-2.32514	-1.92774	-1.96967	-1.69977	-1.10623	-1.15257	-1.46067	-1.14592	-1.57458	NaN	S	2	___1		N-acetyltransferase ESCO2					Phosphoserine					In isoform 2.		Cdc2 kinase substrate motif;CDK kinase substrate motif;CDK1,2,4,6 kinase substrate motif;ERK1,2 kinase substrate motif;G protein-coupled receptor kinase 1 substrate motif;GSK3 kinase substrate motif;GSK-3, ERK1, ERK2, CDK5 substrate motif;WW domain binding motif	0.992667	0.00949216	66.393	56.705	66.393	-0.26849	UID467
21	E5RJX7;E5RHX7;E5RFM6;E5RK23;E5RFM4;E5RHF7;E5RGM6;E5RI25;E5RFM0;E5RGT0;E5RH71;E5RIX5;E5RFS5;P06241	21;21;21;21;21;21;21;21;21;21;21;21;21;21	E5RJX7	E5RJX7	Tyrosine-protein kinase Fyn	FYN	CKDKEATKLTEERDGSLNQSSGYRYGTDPTP		0.858765	0.9483	-0.0735655	-0.184616	NaN	NaN	-1.96009	-1.5871	-1.98263	-1.96427	-2.41224	-2.83285	-1.29087	-1.14801	-1.31583	NaN	S	2	___1		Tyrosine-protein kinase Fyn					Phosphoserine							14-3-3 domain binding motif;Calmodulin-dependent protein kinase II substrate motif;G protein-coupled receptor kinase 1 substrate motif;GSK3 kinase substrate motif;Phosphorylase kinase substrate motif;PKA kinase substrate motif;PKC kinase substrate motif	1	5.36198e-05	122.86	98.57	122.86	-2.2795	UID468	PKACA
152	E5RGS2;Q9H6H4	152;152	E5RGS2	E5RGS2	Receptor expression-enhancing protein;Receptor expression-enhancing protein 4	REEP4	ATKSQGALAGRLRSFSMQDLRSISDAPAPAY		0.0374354	0.206719	0.479672	2.39812	1.40821	1.56576	0.688572	1.58923	1.09073	1.87143	0.743366	1.2636	0.917301	1.09959	0.697222	0.61483	S	2	___1		Receptor expression-enhancing protein 4					Phosphoserine					In isoform 2.		14-3-3 domain binding motif;Akt kinase substrate motif;AMP-activated protein kinase substrate motif;Calmodulin-dependent protein kinase II substrate motif;Casein kinase II substrate motif;HMGCoA Reductase kinase substrate motif;MAPKAPK1 kinase substrate motif;p70 Ribosomal S6 kinase substrate motif;PKA kinase substrate motif;PKC kinase substrate motif;Pyruvate dehydrogenase kinase substrate motif	0.999999	0.000148109	145.25	117.23	145.25	-1.1069	UID469
125	E5RI98;P06748	61;125	E5RI98;P06748	P06748	Nucleophosmin	NPM1	HISGQHLVAVEEDAESEDEEEEDVKLLSISG		0.360389	0.670384	0.319623	0.958545	5.15216	5.20663	4.75579	4.44872	4.21605	4.38257	3.08846	4.97819	4.36476	4.23623	4.57203	5.0045	S	3	___1	Nucleoplasmin	Nucleophosmin		Asp/Glu-rich (acidic)			Phosphoserine| by CDK2	Does not affect phosphorylation by PLK2	Required for interaction with SENP3					b-Adrenergic Receptor kinase substrate motif;BARD1 BRCT domain binding motif;Casein kinase I substrate motif;Casein kinase II substrate motif;G protein-coupled receptor kinase 1 substrate motif	1	1.5288e-102	310.22	294.63	310.22	-0.24127	UID470	ATR
6	E5RI98	6	E5RI98	E5RI98		NPM1	__________MNYEGSPIKVTLATLKMSVQP		0.0653589	0.262304	-0.328743	-2.06931	-0.506163	-0.601368	-0.841255	-0.403515	-0.620544	-0.233484	-0.0434647	0.0275764	-0.326677	-0.269604	0.14797	-0.769672	S	2	___1	Nucleoplasmin													Cdc2 kinase substrate motif;CDK kinase substrate motif;CDK1,2,4,6 kinase substrate motif;ERK1,2 kinase substrate motif;GSK-3, ERK1, ERK2, CDK5 substrate motif;WW domain binding motif	1	0.000355514	115.78	87.675	91.867	-0.53224	UID471
13	E5RJ37;P07948	13;13	E5RJ37	E5RJ37	Tyrosine-protein kinase Lyn	LYN	___MGCIKSKGKDSLSDDGVDLKTQPVRNTE		0.115805	0.365794	0.237826	1.72197	2.20907	2.25613	1.78272	2.15211	2.11817	2.42346	1.88369	2.00716	2.01313	2.32713	1.70877	1.57483	S	2	___1		Tyrosine-protein kinase Lyn					Phosphoserine							Casein kinase I substrate motif;PKA kinase substrate motif	1	1.79643e-27	283.49	199.02	266.93	-0.06216	UID472
39	E5RJY1;E7ESM1;Q92597	39;77;330	E5RJY1	E5RJY1	Protein NDRG1	NDRG1	MPSASMTRLMRSRTASGSSVTSLDGTRSRSH		0.911422	0.969369	0.0324872	0.114413	-2.05675	-1.96319	-1.92586	NaN	-1.11674	-1.11532	-1.72371	-2.03733	-0.843052	-1.59228	-1.65	-2.16199	S	2	___1		Protein NDRG1					Phosphoserine| by SGK1							14-3-3 domain binding motif;Akt kinase substrate motif;Calmodulin-dependent protein kinase II substrate motif;Casein kinase II substrate motif;MAPKAPK1 kinase substrate motif;MAPKAPK2 kinase substrate motif;PKA kinase substrate motif;PKC kinase substrate motif	0.957144	0.00246497	78.814	63.152	78.814	0.45044	UID473	PKACA;SGK1
1543	E7EMW7;O95071	1543;1549	E7EMW7	E7EMW7	E3 ubiquitin-protein ligase UBR5	UBR5	SQSSYIIRNPQQRRISQSQPVRGRDEEQDDI		0.352872	0.662944	-0.639914	-0.979618	-0.0360947	-0.25157	-0.582397	-0.293388	-0.44977	-3.53792	0.333101	0.413288	-1.0644	-0.712311	-0.0627251	NaN	S	2	___1		E3 ubiquitin-protein ligase UBR5					Phosphoserine							14-3-3 domain binding motif;ATM kinase substrate motif;Calmodulin-dependent protein kinase II substrate motif;Casein kinase II substrate motif;DNA dependent Protein kinase substrate motif;G protein-coupled receptor kinase 1 substrate motif;PAK2 kinase substrate motif;PKA kinase substrate motif;PKC epsilon kinase substrate motif;PKC kinase substrate motif	0.99932	6.78489e-05	140.14	82.793	140.14	1.1854	UID474
134	F5H3K2;F5H8B7;E7ENF1;G5EA44;F5H7W8;Q96C57	134;132;138;169;210;179	F5H3K2	F5H3K2	Uncharacterized protein C12orf43	C12orf43	AAVSASDILQESAIHSPGTVEKEAKKKRKLK		0.629603	0.834532	0.0977055	0.497486	1.04288	1.15302	1.10115	1.16903	1.64469	1.71988	1.51881	1.23278	0.898464	1.29381	1.65562	0.644926	S	3	___1		Uncharacterized protein C12orf43												Casein kinase II substrate motif;ERK1,2 kinase substrate motif;GSK-3, ERK1, ERK2, CDK5 substrate motif;MAPKAPK2 kinase substrate motif;WW domain binding motif	0.966005	1.20276e-61	264.22	247.43	210.11	-0.069916	UID475
64	H0Y9H2;E7EV99;E7ENY0;P35611;A0A0A0MSR2	64;358;358;358;358	H0Y9H2	H0Y9H2	Alpha-adducin	ADD1	LLNPEKYKAKSRSPGSPVGEGTGSPPKWQIG		0.486962	0.77049	0.0949094	0.721782	1.16145	1.35343	1.18685	1.45589	1.00511	1.60253	1.59148	1.24288	1.27072	0.880095	1.12666	1.08398	S	2	___1		Alpha-adducin					Phosphoserine							ERK1,2 kinase substrate motif;GSK-3, ERK1, ERK2, CDK5 substrate motif;WW domain binding motif	1	1.57927e-51	313.32	281.45	309.88	0.14589	UID477
2107	E7EPN9;Q9Y520;H7C5N8	2107;2105;653	E7EPN9	E7EPN9	Protein PRRC2C	PRRC2C	QPRAGPIKAQKLPDLSPVENKEHKPGPIGKE		0.011742	0.120607	0.657788	3.14977	1.00885	0.860073	0.43088	0.691217	1.25338	1.13197	0.530289	0.3885	-0.326181	-0.00135994	0.600113	NaN	S	2	___1		Protein PRRC2C					Phosphoserine							Casein kinase II substrate motif;ERK1,2 kinase substrate motif;GSK-3, ERK1, ERK2, CDK5 substrate motif;WW domain binding motif	1	2.86393e-17	268.74	211.93	158.42	-0.44785	UID479
1251	E7EPN9;Q9Y520	1251;1249	E7EPN9	E7EPN9	Protein PRRC2C	PRRC2C	GPLRQREESETRSESSDFEVVPKRRRQRGSE		0.0573257	0.243066	-0.29659	-2.17838	0.20199	0.0549183	-0.0204792	0.206417	0.398764	0.228352	0.528908	0.244999	0.207798	0.448917	0.94396	NaN	S	2	___1		Protein PRRC2C												Casein kinase II substrate motif;MDC1 BRCT domain binding motif;Plk1 PBD domain binding motif	0.998343	9.26022e-07	135.1	101.14	106.49	0.49463	UID480
1546	E7EPN9;Q9Y520;H7C5N8	1546;1544;92	E7EPN9	E7EPN9	Protein PRRC2C	PRRC2C	ENVLPPKREIAKRSFSSQRPVDRQNRRGNNG		0.761669	0.904879	0.0391424	0.31265	NaN	0.623983	0.0696163	0.403873	0.319862	0.560789	0.466545	0.223169	0.157909	0.420382	0.667109	0.203781	S	2	___1		Protein PRRC2C												14-3-3 domain binding motif;Calmodulin-dependent protein kinase II substrate motif;CLK1 kinase substrate motif;G protein-coupled receptor kinase 1 substrate motif;PKA kinase substrate motif;PKC kinase substrate motif	0.994719	0.000124729	116.84	81.341	116.74	3.5613	UID481
432	S4R3H4;E7EQT4;Q9UKV3	432;450;490	S4R3H4	S4R3H4	Apoptotic chromatin condensation inducer in the nucleus	ACIN1	GGLSPLSSPSDTKAESPAEKVPEESVLPLVQ		0.299733	0.609944	-0.217445	-1.0937	0.885483	0.566658	0.527735	0.684921	1.00614	1.53793	0.640869	0.917238	1.15988	1.44299	1.4018	0.950764	S	3	___1		Apoptotic chromatin condensation inducer in the nucleus					Phosphoserine					In isoform 2.;In isoform 3.		b-Adrenergic Receptor kinase substrate motif;Casein kinase II substrate motif;ERK1,2 kinase substrate motif;GSK-3, ERK1, ERK2, CDK5 substrate motif;PKA kinase substrate motif;PKC kinase substrate motif;WW domain binding motif	1	7.74606e-27	208.88	200.26	208.88	0.70807	UID484
420	S4R3H4;E7EQT4;Q9UKV3	420;438;478	S4R3H4	S4R3H4	Apoptotic chromatin condensation inducer in the nucleus	ACIN1	ELLVSQHTVQLVGGLSPLSSPSDTKAESPAE		0.126226	0.382832	-0.223961	-1.66826	2.29622	2.39632	2.22542	1.90969	1.96187	2.28062	2.46132	2.27936	2.66122	2.44349	2.62511	1.94341	S	3	___1		Apoptotic chromatin condensation inducer in the nucleus					Phosphoserine			In dbSNP:rs3751501.		In isoform 2.;In isoform 3.		Casein kinase II substrate motif;ERK1,2 kinase substrate motif;G protein-coupled receptor kinase 1 substrate motif;GSK3 kinase substrate motif;GSK-3, ERK1, ERK2, CDK5 substrate motif;WW domain binding motif	0.999361	1.17465e-14	168.26	151.11	152.66	-0.19778	UID486
780	S4R3H4;E7EQT4;Q9UKV3;G3V3B0;G3V3T3	780;798;838;79;80	S4R3H4;G3V3T3	S4R3H4	Apoptotic chromatin condensation inducer in the nucleus	ACIN1	KISVVSATKGVPAGNSDTEGGQPGRKRRWGA		0.715065	0.881595	0.0659344	0.378277	NaN	1.04038	1.33475	1.30075	0.612858	0.904495	1.30878	1.11078	NaN	0.824594	0.959478	0.659931	S	2	___1		Apoptotic chromatin condensation inducer in the nucleus					Phosphoserine							Casein kinase II substrate motif	0.997493	9.47039e-18	182.57	136.74	182.57	-1.6084	UID487
840	S4R3H4;E7EQT4;Q9UKV3;G3V3B0	840;858;898;139	S4R3H4	S4R3H4	Apoptotic chromatin condensation inducer in the nucleus	ACIN1	GQEAVVDLHADDSRISEDETERNGDDGTHDK		0.134192	0.392054	0.392046	1.62983	-0.480169	-0.88105	0.178661	0.176888	-0.165442	-0.451263	-0.92388	-0.803417	-0.422632	-1.07142	0.068964	-0.822262	S	2	___1		Apoptotic chromatin condensation inducer in the nucleus					Phosphoserine							BARD1 BRCT domain binding motif;Casein kinase II substrate motif;G protein-coupled receptor kinase 1 substrate motif;PKA kinase substrate motif;PKC kinase substrate motif	1	2.26276e-07	138.08	108.74	138.08	-0.14342	UID488
767	S4R3H4;E7EQT4;Q9UKV3;G3V3T3	767;785;825;67	S4R3H4;G3V3T3	S4R3H4	Apoptotic chromatin condensation inducer in the nucleus	ACIN1	EKKESSLPKSFKRKISVVSATKGVPAGNSDT		0.084304	0.30802	0.460399	1.91644	-1.21595	-1.05169	-2.19091	-1.39224	-1.59257	-1.69655	-1.65418	-1.29003	-2.26624	-2.29965	-2.02698	-2.36522	S	2	___1		Apoptotic chromatin condensation inducer in the nucleus					Phosphoserine							14-3-3 domain binding motif;Calmodulin-dependent protein kinase II alpha substrate motif;Calmodulin-dependent protein kinase II substrate motif;Calmodulin-dependent protein kinase IV substrate motif;Casein kinase II substrate motif;G protein-coupled receptor kinase 1 substrate motif;Phosphorylase kinase substrate motif;Pim1 kinase substrate sequence;PKA kinase substrate motif;PKC epsilon kinase s…	0.944943	0.00347733	94.767	47.948	94.767	-1.5507	UID489
652	S4R3H4;E7EQT4;Q9UKV3	652;670;710	S4R3H4	S4R3H4	Apoptotic chromatin condensation inducer in the nucleus	ACIN1	ERTSTSSSSVQARRLSQPESAEKHVTQRLQP		0.073887	0.281657	-0.300216	-1.99593	2.97445	2.91983	3.06968	2.78267	2.96187	2.58733	2.94152	3.77232	2.8778	3.02802	3.2117	3.26577	S	2	___1		Apoptotic chromatin condensation inducer in the nucleus					Phosphoserine					In isoform 2.;In isoform 3.		14-3-3 domain binding motif;ATM kinase substrate motif;Calmodulin-dependent protein kinase II substrate motif;Casein kinase II substrate motif;DNA dependent Protein kinase substrate motif;G protein-coupled receptor kinase 1 substrate motif;GSK3 kinase substrate motif;PAK2 kinase substrate motif;PKA kinase substrate motif;PKC epsilon kinase substrate motif;PKC kinase substrate motif	1	2.33783e-11	246.51	171.97	219.16	-0.96162	UID490
158	S4R3H4;E7EQT4;Q9UKV3	158;176;216	S4R3H4	S4R3H4	Apoptotic chromatin condensation inducer in the nucleus	ACIN1	HSPRKSSSISEEKGDSDDEKPRKGERRSSRV		0.587342	0.830499	-0.104689	-0.560704	3.25984	3.40064	3.15222	2.90028	3.75312	3.02029	2.82244	3.65944	3.46104	3.25813	3.74631	3.16716	S	3	___1		Apoptotic chromatin condensation inducer in the nucleus		Glu-rich			Phosphoserine					In isoform 2.;In isoform 3.		b-Adrenergic Receptor kinase substrate motif;BARD1 BRCT domain binding motif;Casein kinase II substrate motif;PKA kinase substrate motif;PKC kinase substrate motif	1	3.33014e-71	329.54	299.36	245.92	-0.29747	UID492
946	S4R3H4;E7EQT4;Q9UKV3;G3V3B0	946;964;1004;245	S4R3H4	S4R3H4	Apoptotic chromatin condensation inducer in the nucleus	ACIN1	VSITIDDPVRTAQVPSPPRGKISNIVHISNL		0.161705	0.425779	0.271676	1.51108	2.65516	2.65187	2.07328	2.10914	2.40301	2.64041	2.63995	2.43391	1.98829	1.89487	2.2182	1.72759	S	2	___1		Apoptotic chromatin condensation inducer in the nucleus					Phosphoserine							Cdc2 kinase substrate motif;CDK kinase substrate motif;CDK1,2,4,6 kinase substrate motif;DNA dependent Protein kinase substrate motif;ERK1,2 kinase substrate motif;GSK-3, ERK1, ERK2, CDK5 substrate motif;WW domain binding motif	1	4.79728e-05	172.61	137.32	172.61	-0.25602	UID493
307	S4R3H4;E7EQT4;Q9UKV3	307;325;365	S4R3H4	S4R3H4	Apoptotic chromatin condensation inducer in the nucleus	ACIN1	SHLARQQQEKEMKTTSPLEEEEREIKSSQGL		0.179079	0.451455	0.224436	1.45709	-0.152441	-0.320417	-0.092617	0.0178528	0.121273	0.361385	-0.0817528	-0.024334	NaN	-0.323141	-0.0662003	-0.680891	S	2	___1		Apoptotic chromatin condensation inducer in the nucleus		Glu-rich			Phosphoserine					In isoform 2.;In isoform 3.		Casein kinase II substrate motif;ERK1,2 kinase substrate motif;GSK-3, ERK1, ERK2, CDK5 substrate motif;PKA kinase substrate motif;PKC kinase substrate motif;WW domain binding motif	0.999778	8.39977e-06	145.28	108.69	134.13	-0.83205	UID494
46	E7ERS3;Q86VM9;H3BPD0	46;46;46	E7ERS3	E7ERS3	Zinc finger CCCH domain-containing protein 18	ZC3H18	DSGSDQDLDGAGVRASDLEDEESAARGPSQE		0.0882646	0.309388	0.240469	1.8886	1.95603	1.97888	2.22651	2.3083	2.21148	2.39132	2.10767	2.05988	1.97198	1.88294	2.15543	1.45181	S	2	___1		Zinc finger CCCH domain-containing protein 18					Phosphoserine							Casein kinase II substrate motif;PKA kinase substrate motif;PKC kinase substrate motif	1	5.88475e-10	213.06	170.34	213.06	1.3742	UID495
74	E7ERS3;Q86VM9;H3BPD0	74;74;74	E7ERS3	E7ERS3	Zinc finger CCCH domain-containing protein 18	ZC3H18	SQEEEDNHSDEEDRASEPKSQDQDSEVNELS	+	5.94458e-05	0.036	-0.692961	-6.61772	-0.17918	-0.274923	-0.285473	-0.517141	-0.530012	-0.344213	0.389174	0.545321	0.439407	0.33676	0.391663	-0.0755024	S	3	___1		Zinc finger CCCH domain-containing protein 18					Phosphoserine							Casein kinase I substrate motif;G protein-coupled receptor kinase 1 substrate motif;GSK3 kinase substrate motif;PKA kinase substrate motif;PKC kinase substrate motif	0.840908	3.10416e-06	115.55	102.32	103.53	-0.012143	UID498
558	E7ERS3;Q86VM9;H3BP01	558;534;199	E7ERS3	E7ERS3	Zinc finger CCCH domain-containing protein 18	ZC3H18	WRRSKSPKKKLGVSVSPSRARRRRKTSASSA		0.625497	0.833426	0.0976547	0.503531	2.64433	2.7536	2.41151	2.44294	3.11277	3.38684	2.89881	3.0283	2.38935	2.40033	2.87814	2.57113	S	2	___1		Zinc finger CCCH domain-containing protein 18		Ser-rich			Phosphoserine							Casein kinase II substrate motif;Cdc2 kinase substrate motif;CDK kinase substrate motif;CDK1,2,4,6 kinase substrate motif;ERK1,2 kinase substrate motif;G protein-coupled receptor kinase 1 substrate motif;GSK-3, ERK1, ERK2, CDK5 substrate motif;WW domain binding motif	0.990557	4.61041e-05	178.46	114.04	172.8	-0.97511	UID501
83	E7ERS3;Q86VM9	83;83	E7ERS3	E7ERS3	Zinc finger CCCH domain-containing protein 18	ZC3H18	DEEDRASEPKSQDQDSEVNELSRGPTSSPCE		0.595605	0.829133	-0.144542	-0.552647	0.395508	0.127131	1.04658	0.723288	0.945833	NaN	NaN	0.725548	1.23578	1.05965	0.857006	0.0830631	S	2	___1		Zinc finger CCCH domain-containing protein 18					Phosphoserine							b-Adrenergic Receptor kinase substrate motif;Casein kinase I substrate motif;G protein-coupled receptor kinase 1 substrate motif	1	1.63587e-11	176.56	157.23	176.56	0.41551	UID502
866	E7ERS3;Q86VM9;H3BRH3	866;842;85	E7ERS3	E7ERS3	Zinc finger CCCH domain-containing protein 18	ZC3H18	KGSRKRYEPSDKDRQSPPPAKRPNTSPDRGS		0.496814	0.775128	0.105103	0.708095	0.805788	0.868488	0.638489	0.943012	1.22131	1.24647	NaN	0.613308	0.748512	0.934933	1.24819	0.699171	S	3	___1		Zinc finger CCCH domain-containing protein 18					Phosphoserine					In isoform 2.		Casein kinase I substrate motif;ERK1,2 kinase substrate motif;G protein-coupled receptor kinase 1 substrate motif;GSK-3, ERK1, ERK2, CDK5 substrate motif;PKA kinase substrate motif;PKC kinase substrate motif;WW domain binding motif	0.999711	1.12961e-05	116.82	81.06	99.891	0.4015	UID503
898	E7ERY9;P20020;H0YHH6;A0A0U1RQU3	898;1193;136;235	E7ERY9	E7ERY9	Calcium-transporting ATPase;Plasma membrane calcium-transporting ATPase 1	ATP2B1	SIHNFMTHPEFRIEDSEPHIPLIDDTDAEDD		0.753164	0.89735	0.0623234	0.324242	0.812855	0.627043	0.643789	0.960733	0.734943	1.06497	NaN	0.30051	0.814272	1.00189	1.2927	0.31595	S	3	___1	ATP_Ca_trans_C	Plasma membrane calcium-transporting ATPase 1					Phosphoserine					In isoform A.;In isoform E.	Cytoplasmic	AMP-activated protein kinase substrate motif;b-Adrenergic Receptor kinase substrate motif;G protein-coupled receptor kinase 1 substrate motif	1	1.71414e-20	192.01	167.94	171.73	-1.7044	UID504
275	E7ES96;P49768	275;367	E7ES96	E7ES96	Presenilin;Presenilin-1;Presenilin-1 NTF subunit;Presenilin-1 CTF subunit;Presenilin-1 CTF12	PSEN1	RSTPESRAAVQELSSSILAGEDPEERGVKLG		0.315006	0.621592	-0.116709	-1.06408	0.503969	0.602112	0.3248	0.74423	0.24086	0.619741	0.545572	0.666744	0.436073	0.580145	0.884769	NaN	S	2	___1	Presenilin	Presenilin-1 CTF subunit;Presenilin-1 CTF12					Phosphoserine		Required for interaction with CTNNB1			In isoform 3| isoform 5.;In isoform 4.;In isoform 6.	Cytoplasmic	MDC1 BRCT domain binding motif;Plk1 PBD domain binding motif	0.996749	1.74941e-43	279.53	252.98	272.48	1.0484	UID506
313	E7ESD5;E9PLN6;F2Z2Y1;O95677	313;338;367;361	E7ESD5	E7ESD5	Eyes absent homolog;Eyes absent homolog 4	EYA4	SSGSKSRGRGRKNNPSPPPDSDLERVFVWDL		0.42551	0.723065	0.16494	0.834659	NaN	-1.12613	-1.11786	-1.13814	-0.930117	-0.674576	-0.898098	-0.988293	-1.27234	-0.850542	-1.04368	-1.92088	S	2	___1		Eyes absent homolog 4					Phosphoserine							DNA dependent Protein kinase substrate motif;ERK1,2 kinase substrate motif;GSK-3, ERK1, ERK2, CDK5 substrate motif;PKA kinase substrate motif;WW domain binding motif	0.999973	0.00807771	68.262	47.29	68.262	0.92694	UID507
241	H0Y4T7;E7ESY4;Q13330	241;449;449	H0Y4T7	H0Y4T7	Metastasis-associated protein MTA1	MTA1	TRLDGERPGPNRSNMSPHGLPARSSGSPKFA		0.77891	0.910354	0.102927	0.288427	-1.95322	-1.80915	-2.44946	-2.14677	-1.56512	-1.71403	-3.14621	-2.10346	-2.57039	-2.23239	-1.07522	-1.12765	S	2	___1		Metastasis-associated protein MTA1					Phosphoserine					In isoform Short.		ERK1,2 kinase substrate motif;GSK-3, ERK1, ERK2, CDK5 substrate motif;WW domain binding motif	0.999888	6.07564e-05	124.45	84.535	124.45	0.79471	UID508
368	H0Y4T7;E7ESY4;Q13330;F8W9Y9	368;576;576;112	H0Y4T7	H0Y4T7	Metastasis-associated protein MTA1	MTA1	SSLTPAKVAPVINNGSPTILGKRSYEQHNGV		0.190278	0.470992	-0.427364	-1.41657	-0.638298	-1.5626	-0.291683	-0.603163	-0.739059	-0.066534	0.537712	-0.141129	-0.468769	-0.74317	-0.298935	NaN	S	2	___1		Metastasis-associated protein MTA1					Phosphoserine					In isoform Short.		Casein kinase II substrate motif;ERK1,2 kinase substrate motif;GSK-3, ERK1, ERK2, CDK5 substrate motif;WW domain binding motif	0.967104	2.17863e-08	136.81	114.48	117.2	0.98119	UID509
216	F5GXF5;E7ETD6;Q12830;A0A0A0MR81	216;77;216;77	F5GXF5	F5GXF5	Nucleosome-remodeling factor subunit BPTF	BPTF	SSTPGRRKPRVHRPRSPILEEKDIPPLEFPK		0.150031	0.412163	-0.261008	-1.5591	-0.989374	-0.958424	-1.00576	-0.770052	-1.07868	-1.19578	-1.13225	-0.238277	-0.55374	-0.85364	-0.457489	-1.19663	S	2	___1		Nucleosome-remodeling factor subunit BPTF					Phosphoserine							14-3-3 domain binding motif;Calmodulin-dependent protein kinase II substrate motif;Calmodulin-dependent protein kinase IV substrate motif;Chk1 kinase substrate motif;ERK1,2 kinase substrate motif;Growth associated histone HI kinase substrate motif;GSK-3, ERK1, ERK2, CDK5 substrate motif;PKA kinase substrate motif;PKC kinase substrate motif;WW domain binding motif	1	0.00965481	76.17	30.197	72.607	-0.65204	UID512
906	J3KQ96;E7ETY2;H0YAB7;Q13428	906;906;65;906	J3KQ96;Q13428	J3KQ96	Treacle protein	TCOF1	GKTHQIRAALAPAKESPRKGAAPTPPGKTGP		0.0218232	0.157687	-0.642906	-2.71294	3.42981	3.4129	3.12281	3.19671	3.19735	2.63927	4.45213	4.20479	3.28889	3.27387	4.08817	3.54844	S	3	___1	Treacle	Treacle protein					Phosphoserine							b-Adrenergic Receptor kinase substrate motif;Cdc2 kinase substrate motif;CDK kinase substrate motif;CDK1,2,4,6 kinase substrate motif;ERK1,2 kinase substrate motif;Growth associated histone HI kinase substrate motif;GSK-3, ERK1, ERK2, CDK5 substrate motif;PKA kinase substrate motif;PKC kinase substrate motif;WW domain binding motif	1	1.20338e-07	156.81	138.07	140.27	1.6796	UID513
1340	J3KQ96;E7ETY2;Q13428	1340;1378;1378	J3KQ96;Q13428	J3KQ96	Treacle protein	TCOF1	KKKKLGAGEGGEASVSPEKTSTTSKGKAKRD		0.324301	0.62924	-0.251998	-1.03668	1.49262	1.31204	1.01018	1.05052	1.63536	1.5691	2.39522	1.95754	1.05634	1.21761	1.78126	1.17384	S	2	___1		Treacle protein					Phosphoserine					In isoform 5.		Casein kinase II substrate motif;Cdc2 kinase substrate motif;CDK kinase substrate motif;CDK1,2,4,6 kinase substrate motif;ERK1,2 kinase substrate motif;G protein-coupled receptor kinase 1 substrate motif;GSK-3, ERK1, ERK2, CDK5 substrate motif;WW domain binding motif	1	1.80997e-109	405.9	366.72	308.02	0.63658	UID515
1312	J3KQ96;E7ETY2;Q13428	1312;1350;1350	J3KQ96;Q13428	J3KQ96	Treacle protein	TCOF1	KESSRKGWESRKRKLSGDQPAARTPRSKKKK		0.191036	0.471903	-0.656462	-1.40251	-3.27267	-3.63554	-2.37781	-1.4918	-2.2313	-3.32071	-2.65375	-0.772226	-2.08699	-2.17886	-1.63892	-3.06032	S	2	___1		Treacle protein					Phosphoserine					In isoform 5.		14-3-3 domain binding motif;Akt kinase substrate motif;Calmodulin-dependent protein kinase II substrate motif;G protein-coupled receptor kinase 1 substrate motif;MAPKAPK1 kinase substrate motif;Pim1 kinase substrate sequence;PKA kinase substrate motif;PKC epsilon kinase substrate motif;PKC kinase substrate motif	1	0.000627114	107.09	72.396	98.04	1.1065	UID516
1190	J3KQ96;E7ETY2;Q13428	1190;1228;1228	J3KQ96;Q13428	J3KQ96	Treacle protein	TCOF1	PANSQASKATPKLDSSPSVSSTLAAKDDPDG		0.821262	0.930547	-0.0478101	-0.233467	2.12466	1.72064	1.75323	1.6933	NaN	NaN	2.18383	2.16647	1.49897	1.34587	2.15852	1.87093	S	2	___1		Treacle protein					Phosphoserine					In isoform 5.		Casein kinase II substrate motif;ERK1,2 kinase substrate motif;G protein-coupled receptor kinase 1 substrate motif;GSK3 kinase substrate motif;GSK-3, ERK1, ERK2, CDK5 substrate motif;MDC1 BRCT domain binding motif;PKA kinase substrate motif;Plk1 PBD domain binding motif;WW domain binding motif	0.99989	8.34366e-17	230.36	182.35	220.21	0.10374	UID518
1219	J3KQ96;E7ETY2;Q13428	1219;1257;1257	J3KQ96;Q13428	J3KQ96	Treacle protein	TCOF1	DGKQEAKPQQAAGMLSPKTGGKEAASGTTPQ		0.689088	0.870285	-0.0767384	-0.411921	-0.587292	-0.51104	-0.48806	-0.466875	-0.246414	0.0930882	0.0545158	-0.169933	-0.920982	-0.565979	0.0242634	-0.168047	S	2	___1		Treacle protein					Phosphoserine					In isoform 5.		Casein kinase II substrate motif;ERK1,2 kinase substrate motif;Growth associated histone HI kinase substrate motif;GSK-3, ERK1, ERK2, CDK5 substrate motif;PKA kinase substrate motif;PKC kinase substrate motif;WW domain binding motif	1	0.000343176	99.215	79.892	77.192	1.8498	UID519
967	J3KQ96;E7ETY2;Q13428	967;1004;967	J3KQ96;Q13428	J3KQ96	Treacle protein	TCOF1	AQVIKPPLIFVDPNRSPAGPAATPAQAQAAS		0.161504	0.426451	-0.436253	-1.52538	-0.984692	-1.1106	-1.04676	-1.11321	-1.16101	-1.04009	0.225498	-0.152224	-1.15115	NaN	-0.621651	-1.49951	S	2	___1		Treacle protein					Phosphoserine					In isoform 5.		ERK1,2 kinase substrate motif;G protein-coupled receptor kinase 1 substrate motif;Growth associated histone HI kinase substrate motif;GSK-3, ERK1, ERK2, CDK5 substrate motif;WW domain binding motif	1	4.65813e-06	110.37	98.752	110.37	1.328	UID520
381	J3KQ96;E7ETY2;Q13428	381;381;381	J3KQ96;Q13428	J3KQ96	Treacle protein	TCOF1	GKTSQVGAASAPAKESPRKGAAPAPPGKTGP		0.125067	0.379559	-0.381167	-1.67403	3.56744	3.3397	2.94406	3.22822	3.58375	3.50547	3.19782	4.2755	3.63223	3.63479	4.4141	3.3012	S	2	___1	Treacle	Treacle protein					Phosphoserine							b-Adrenergic Receptor kinase substrate motif;Cdc2 kinase substrate motif;CDK kinase substrate motif;CDK1,2,4,6 kinase substrate motif;ERK1,2 kinase substrate motif;Growth associated histone HI kinase substrate motif;GSK-3, ERK1, ERK2, CDK5 substrate motif;PKA kinase substrate motif;PKC kinase substrate motif;WW domain binding motif	1	2.51559e-76	360.21	327.46	235.37	-2.8728	UID521
156	J3KQ96;E7ETY2;Q13428	156;156;156	J3KQ96;Q13428	J3KQ96	Treacle protein	TCOF1	HPATGKTVANLLSGKSPRKSAEPSANTTLVS		0.0386418	0.207916	-0.481343	-2.41951	-1.00854	-1.14416	-1.06372	-1.28602	-0.726662	-0.774187	-0.942715	-0.221228	-1.03344	-0.16934	-0.229311	NaN	S	2	___1		Treacle protein					Phosphoserine							Cdc2 kinase substrate motif;CDK kinase substrate motif;CDK1,2,4,6 kinase substrate motif;ERK1,2 kinase substrate motif;G protein-coupled receptor kinase 1 substrate motif;Growth associated histone HI kinase substrate motif;GSK3 kinase substrate motif;GSK-3, ERK1, ERK2, CDK5 substrate motif;PKA kinase substrate motif;PKC kinase substrate motif;WW domain binding motif	0.998553	2.1758e-07	150.34	99.277	148.18	0.40458	UID522	CDK1
1046	E7EX73;E9PGM1;E7EUU4;Q04637	1046;1123;1170;1209	E7EX73	E7EX73	Eukaryotic translation initiation factor 4 gamma 1	EIF4G1	SRERPSQPEGLRKAASLTEDRDRGRDAVKRE		0.522069	0.789401	-0.142987	-0.663406	-0.353498	-0.395763	0.146967	0.0179729	0.197123	-0.636581	-0.530195	0.0506382	-0.142519	-0.0972633	0.700247	-0.146765	S	2	___1		Eukaryotic translation initiation factor 4 gamma 1					Phosphoserine							Calmodulin-dependent protein kinase II substrate motif;Casein kinase II substrate motif;Chk1 kinase substrate motif;Phosphorylase kinase substrate motif;PKA kinase substrate motif;PKC kinase substrate motif	0.999999	0.000150719	159.79	111	159.79	0.61787	UID523
1068	E7EX73;E9PGM1;E7EUU4;Q04637	1068;1145;1192;1231	E7EX73	E7EX73	Eukaryotic translation initiation factor 4 gamma 1	EIF4G1	RGRDAVKREAALPPVSPLKAALSEEELEKKS		0.286942	0.592596	0.399577	1.13188	-0.65951	-0.869507	-0.988441	-1.11638	0.0101223	-0.406399	-0.334112	-0.57436	-2.026	-1.6829	-0.738951	NaN	S	2	___1		Eukaryotic translation initiation factor 4 gamma 1					Phosphoserine							Cdc2 kinase substrate motif;CDK kinase substrate motif;CDK1,2,4,6 kinase substrate motif;ERK1,2 kinase substrate motif;G protein-coupled receptor kinase 1 substrate motif;GSK-3, ERK1, ERK2, CDK5 substrate motif;WW domain binding motif	1	7.97329e-05	120.53	95.606	99.752	0.20298	UID524	CDK1
1024	E7EX73;E9PGM1;E7EUU4;Q04637	1024;1101;1148;1187	E7EX73	E7EX73	Eukaryotic translation initiation factor 4 gamma 1	EIF4G1	DRLDRARTPATKRSFSKEVEERSRERPSQPE		0.888978	0.959824	-0.0252711	-0.143198	2.04355	1.60824	1.72629	1.78601	2.26331	2.56069	2.26677	2.06209	1.84672	2.06532	2.24088	1.65794	S	2	___1		Eukaryotic translation initiation factor 4 gamma 1					Phosphoserine							14-3-3 domain binding motif;Calmodulin-dependent protein kinase II substrate motif;Casein kinase II substrate motif;PKA kinase substrate motif;PKC kinase substrate motif	0.999992	0.000475047	148.18	104.88	140.24	1.0492	UID525
297	E7EVA0;P27816;H7C456	297;280;242	E7EVA0	E7EVA0	Microtubule-associated protein;Microtubule-associated protein 4	MAP4	ALATKTEVALAKDMESPTKLDVTLAKDMQPS		0.0897173	0.312935	0.603981	1.90119	0.611183	0.592699	0.308887	0.680391	2.02608	1.44827	0.587532	0.300762	0.649187	0.247492	NaN	-0.0819492	S	2	___1		Microtubule-associated protein 4					Phosphoserine		17 X 14 AA tandem repeats			In isoform 3.;In isoform 4.;In isoform 7.		b-Adrenergic Receptor kinase substrate motif;Casein kinase I substrate motif;Casein kinase II substrate motif;Cdc2 kinase substrate motif;CDK kinase substrate motif;CDK1,2,4,6 kinase substrate motif;ERK1,2 kinase substrate motif;GSK-3, ERK1, ERK2, CDK5 substrate motif;PKA kinase substrate motif;WW domain binding motif	0.999981	7.96606e-26	265.27	197.27	265.27	0.080983	UID526
2218	E7EVA0;P27816;H0Y2V1;H7C4C5;F8W9U4	2218;1073;401;415;766	E7EVA0	E7EVA0	Microtubule-associated protein;Microtubule-associated protein 4	MAP4	SQKLNFKEKAQAKVGSLDNVGHLPAGGAVKT		0.621377	0.833798	-0.121418	-0.511405	-1.84658	-1.47676	-1.99801	-1.85286	-0.905516	-1.07358	-1.63594	-1.66883	-1.33834	-1.45164	-0.925926	NaN	S	2	___1	Tubulin-binding	Microtubule-associated protein 4					Phosphoserine					In isoform 3.;In isoform 7.		Phosphorylase kinase substrate motif;PKA kinase substrate motif;PKC kinase substrate motif	1	5.18625e-06	106.14	85.27	106.14	-0.10055	UID527
271	E7EVX2;Q13439;A0A087WTW2;H0Y6I0	271;266;69;137	E7EVX2	E7EVX2	Golgin subfamily A member 4	GOLGA4	LEPQAEVFTKEENPESDGEPVVEDGTSVKTL		0.0555718	0.237718	0.339361	2.19744	1.04051	1.00401	1.05582	1.24508	1.26344	1.32474	0.199163	0.926905	1.03271	0.893883	1.02853	NaN	S	2	___1		Golgin subfamily A member 4	+	Glu-rich			Phosphoserine							b-Adrenergic Receptor kinase substrate motif;Casein kinase II substrate motif;G protein-coupled receptor kinase 1 substrate motif	1	3.13503e-62	319.43	285.13	319.43	0.21944	UID529
41	E7EVX2;Q13439;Q86W71;C9J0Y3;C9JHJ5	41;41;41;41;41	E7EVX2	E7EVX2	Golgin subfamily A member 4	GOLGA4	SSNSSTPTRMRSRTSSFTEQLDEGTPNRENA		0.909899	0.969251	-0.00907087	-0.117324	1.48938	1.53246	NaN	1.55724	1.65235	NaN	1.65137	1.43448	1.40035	1.63378	1.71468	NaN	S	2	___1		Golgin subfamily A member 4												14-3-3 domain binding motif;Akt kinase substrate motif;Calmodulin-dependent protein kinase II substrate motif;Casein kinase II substrate motif;MAPKAPK1 kinase substrate motif;MAPKAPK2 kinase substrate motif;MDC1 BRCT domain binding motif;PKA kinase substrate motif;PKC kinase substrate motif;Plk1 PBD domain binding motif	0.99998	4.38276e-92	375.6	346.53	283.13	-1.4993	UID530
93	E7EVX2;Q13439;Q86W71	93;71;71	E7EVX2	E7EVX2	Golgin subfamily A member 4	GOLGA4	GDTQSFAQKLQLRVPSVESLFRSPIKESLFR		0.244154	0.548368	0.25939	1.23755	0.921339	1.01372	0.771046	0.807598	1.08738	1.13037	1.14826	0.727194	0.459585	0.84024	1.152	-0.152166	S	2	___1		Golgin subfamily A member 4					Phosphoserine							14-3-3 domain binding motif;AMP-activated protein kinase substrate motif;Calmodulin-dependent protein kinase II substrate motif;Casein kinase II substrate motif;DNA dependent Protein kinase substrate motif;HMGCoA Reductase kinase substrate motif;Phosphorylase kinase substrate motif;PKA kinase substrate motif;PKC kinase substrate motif	1	3.03737e-05	178.84	138.9	168.74	0.55863	UID531	Chk1
548	E7EW05;Q9NVU7	548;585	E7EW05	E7EW05	Protein SDA1 homolog	SDAD1	AAPGKSQKRKYIEIDSDEEPRGELLSLRDIE	+	0.00239012	0.0489362	0.75044	4.03244	2.02968	1.80023	1.95774	1.98483	1.79787	2.06499	0.557518	1.17896	1.59263	1.30165	1.6932	0.808754	S	2	___1	SDA1	Protein SDA1 homolog					Phosphoserine							b-Adrenergic Receptor kinase substrate motif;BARD1 BRCT domain binding motif;Casein kinase I substrate motif;Casein kinase II substrate motif;G protein-coupled receptor kinase 1 substrate motif	1	4.56395e-11	229.95	200.48	221.09	0.16258	UID532
502	E7EWD6;Q76L83	502;530	E7EWD6	E7EWD6	Putative Polycomb group protein ASXL2	ASXL2	SESQESLVTSPSKPKSPGVEKPIVKPTAGAG		0.0483652	0.228115	-1.0817	-2.47141	-1.24498	NaN	-1.53891	NaN	-0.11145	-2.14113	NaN	-0.139969	-0.387568	-0.27103	0.0889091	NaN	S	3	___1		Putative Polycomb group protein ASXL2												ERK1,2 kinase substrate motif;Growth associated histone HI kinase substrate motif;GSK-3, ERK1, ERK2, CDK5 substrate motif;MAPKAPK2 kinase substrate motif;PKA kinase substrate motif;PKC kinase substrate motif;WW domain binding motif	1	2.87529e-06	111.68	99.203	111.68	-1.9072	UID533
544	E7EWR4;P33240	544;524	E7EWR4	E7EWR4	Cleavage stimulation factor subunit 2	CSTF2	MQGASIQGGSQPGGFSPGQNQVTPQDHEKAA		0.0376565	0.207	-1.11863	-2.55809	NaN	0.482454	0.941792	-0.229958	0.694551	-1.12474	NaN	0.916025	1.4251	1.39496	1.34973	NaN	S	4	___1		Cleavage stimulation factor subunit 2		Gly/Pro-rich			Phosphoserine		Interaction with RPO2TC1					ERK1,2 kinase substrate motif;GSK-3, ERK1, ERK2, CDK5 substrate motif;WW domain binding motif	0.945202	2.54354e-12	106.66	97.373	74.164	-1.548	UID534
464	E7EX17;P23588	464;459	E7EX17	E7EX17	Eukaryotic translation initiation factor 4B	EIF4B	KSLENETLNKEEDCHSPTSKPPKPDQPLKVM		0.503431	0.777064	-0.217858	-0.700575	0.829948	0.905914	1.26787	0.928833	1.08673	NaN	1.72232	1.14612	NaN	0.417461	0.764442	2.05824	S	3	___1		Eukaryotic translation initiation factor 4B					Phosphoserine							Casein kinase I substrate motif;Casein kinase II substrate motif;ERK1,2 kinase substrate motif;GSK-3, ERK1, ERK2, CDK5 substrate motif;WW domain binding motif	0.995918	5.87559e-22	186.01	170.2	86.136	1.0802	UID535
509	E7EX17;P23588	509;504	E7EX17	E7EX17	Eukaryotic translation initiation factor 4B	EIF4B	SNPPARSQSSDTEQQSPTSGGGKVAPAQPSE		0.595926	0.827172	0.348764	0.552155	-1.8984	-2.32624	-0.0463886	NaN	-0.692753	-1.9374	-1.82445	-1.90314	-0.493517	NaN	-1.15803	-3.26585	S	2	___1		Eukaryotic translation initiation factor 4B					Phosphoserine							Casein kinase I substrate motif;Casein kinase II substrate motif;ERK1,2 kinase substrate motif;GSK-3, ERK1, ERK2, CDK5 substrate motif;WW domain binding motif	0.976717	2.69921e-41	267.39	233.18	267.39	0.54097	UID537
58	Q6N039;E9PC87;O94876	58;268;382	Q6N039	Q6N039	Transmembrane and coiled-coil domains protein 1	DKFZp686H13261;TMCC1	SKPREIASLIRNKFGSADNIPNLKDSLEEGQ		0.473392	0.759034	-0.0797235	-0.748278	-1.09607	-1.05669	-1.05933	-0.844349	-0.746534	-0.981787	-0.79047	-0.884819	-1.14289	-1.01678	-0.587059	NaN	S	2	___1	Tmemb_cc2	Transmembrane and coiled-coil domains protein 1					Phosphoserine						Cytoplasmic	PKA kinase substrate motif;PKC kinase substrate motif	1	0.016905	57.019	43.511	57.019	-0.16143	UID541
104	E9PCY7;G8JLB6;P31943;E5RGH4;E5RGV0;D6RIU0;D6RBM0;E7EQJ0;D6RAM1;H0YAQ2;D6R9T0;D6RFM3;D6RIT2;D6RDU3;D6RJ04;D6RIH9;P55795	104;104;104;27;52;104;104;104;104;51;104;104;104;104;104;104;104	E9PCY7;P55795	E9PCY7	Heterogeneous nuclear ribonucleoprotein H;Heterogeneous nuclear ribonucleoprotein H, N-terminally processed;Heterogeneous nuclear ribonucleoprotein H2	HNRNPH1;HNRNPH2	NNVEMDWVLKHTGPNSPDTANDGFVRLRGLP		0.267817	0.57604	0.209228	1.17342	4.10215	4.06324	3.69026	3.93421	4.27527	4.11348	3.99642	4.16209	3.55694	3.51638	4.31735	3.37405	S	2	___1		Heterogeneous nuclear ribonucleoprotein H;Heterogeneous nuclear ribonucleoprotein H| N-terminally processed;Heterogeneous nuclear ribonucleoprotein H2					Phosphoserine							Casein kinase II substrate motif;ERK1,2 kinase substrate motif;G protein-coupled receptor kinase 1 substrate motif;GSK-3, ERK1, ERK2, CDK5 substrate motif;WW domain binding motif	1	4.98186e-64	338.97	298.95	338.97	-0.67381	UID542	CDK2
70	E9PDC4;F5GYS8;H0YNY8;U3KPR8;O00470	70;131;196;196;196	E9PDC4	E9PDC4	Homeobox protein Meis1	MEIS1	MPIDLVIDDREGGSKSDSEDITRSANLTDQP		0.188509	0.467762	-0.256597	-1.41128	-1.49097	-1.36415	-1.47501	-1.00686	-0.838795	-1.30756	-1.56342	-0.764429	-0.999067	-1.07466	-0.492022	-1.05017	S	2	___1		Homeobox protein Meis1		Ser/Thr-rich										Casein kinase II substrate motif	0.804927	0.00097837	118.24	98.969	118.24	-0.27649	UID543
214	E9PER6;Q6A1A2;O15530	214;214;241	E9PER6	E9PER6	Putative 3-phosphoinositide-dependent protein kinase 2;3-phosphoinositide-dependent protein kinase 1	PDPK1;PDPK2P	TAKVLSPESKQARANSFVGTAQYVSPELLTE		0.771929	0.909038	-0.0936107	-0.298729	-2.20382	-1.89937	-1.13174	-1.18892	-0.737301	-0.680182	-0.965706	-1.58549	-1.02768	-1.60211	-0.885408	NaN	S	2	___1	Pkinase	3-phosphoinositide-dependent protein kinase 1;Putative 3-phosphoinositide-dependent protein kinase 2				Protein kinase	Phosphoserine| by autocatalysis	No activation				In isoform 3.		14-3-3 domain binding motif;Calmodulin-dependent protein kinase II substrate motif;G protein-coupled receptor kinase 1 substrate motif;PKA kinase substrate motif;PKC kinase substrate motif	0.999998	9.57964e-13	152.18	128.95	152.18	-0.19378	UID544	PDK1
928	E9PF10;O75694	928;992	E9PF10	E9PF10	Nuclear pore complex protein Nup155	NUP155	DTLQELVNQSKAAPQSPSVPKKPGPPVLSSD		0.666416	0.854288	0.0859313	0.445595	1.3705	1.60069	0.936625	1.25031	0.770977	1.43835	1.52512	1.43585	0.80477	0.899569	1.04458	NaN	S	2	___1	Nucleoporin_C	Nuclear pore complex protein Nup155												Casein kinase II substrate motif;ERK1,2 kinase substrate motif;G protein-coupled receptor kinase 1 substrate motif;GSK-3, ERK1, ERK2, CDK5 substrate motif;WW domain binding motif	0.94387	0.000194532	110.44	86.703	110.44	2.0518	UID545
96	E9PFK5;P78316	96;96	E9PFK5	E9PFK5	Nucleolar protein 14	NOP14	NVFRDKRFGEYNSNMSPEEKMMKRFALEQQR		0.00316526	0.058566	0.873946	3.98842	-1.39029	-1.41854	-1.13524	-1.138	-1.31858	-0.489954	-2.0327	NaN	-1.68374	-2.6018	-1.67076	-2.12289	S	2	___1	Nop14	Nucleolar protein 14					Phosphoserine							Casein kinase II substrate motif;ERK1,2 kinase substrate motif;GSK-3, ERK1, ERK2, CDK5 substrate motif;WW domain binding motif	0.999468	0.000174491	111.83	92.545	111.83	-0.2431	UID546
148	E9PFK5;P78316	148;148	E9PFK5	E9PFK5	Nucleolar protein 14	NOP14	SLADIEKHNDIVDSDSDAEDRGTLSAELTAA		0.0630961	0.259265	0.51611	2.15687	NaN	0.129934	0.595909	0.45923	0.208876	0.953697	NaN	-0.698887	0.254551	-0.248436	0.202133	0.257736	S	2	___1	Nop14	Nucleolar protein 14					Phosphoserine							b-Adrenergic Receptor kinase substrate motif;Casein kinase I substrate motif;Casein kinase II substrate motif	1	1.095e-69	354.93	294.85	57.164	0.46773	UID548
19	E9PFN4	19	E9PFN4	E9PFN4	Anion exchange protein	SLC4A7	DGAGEQMRPLLTRVTSRGPDEEAVVDLGKTS		0.206884	0.493862	0.304373	1.36012	-1.48625	-1.58582	-2.64683	-2.13256	-1.79171	-1.4663	-2.15772	-2.08017	-2.44796	-2.20017	-1.89372	NaN	S	3	___1														14-3-3 domain binding motif;Calmodulin-dependent protein kinase II substrate motif;Calmodulin-dependent protein kinase IV substrate motif;Chk1 kinase substrate motif;PKA kinase substrate motif;PKC kinase substrate motif	0.849801	0.00013806	107.03	75.636	44.382	0.2471	UID549
672	E9PG73;Q13427	672;687	E9PG73	E9PG73	Peptidyl-prolyl cis-trans isomerase G	PPIG	NSSNNSREKKADRDQSPFSKIKQSSQDNELK		0.286471	0.59228	-0.228883	-1.12598	1.00995	0.92392	1.25011	1.46032	0.961975	0.25264	0.900249	1.4666	1.40353	1.39123	1.26941	0.801193	S	2	___1		Peptidyl-prolyl cis-trans isomerase G					Phosphoserine					In isoform 2.		14-3-3 domain binding motif;Calmodulin-dependent protein kinase II substrate motif;Casein kinase II substrate motif;ERK1,2 kinase substrate motif;GSK-3, ERK1, ERK2, CDK5 substrate motif;PKA kinase substrate motif;PKC kinase substrate motif;WW domain binding motif	0.999991	0.000642296	124.74	89.646	112.3	0.19966	UID551
729	E9PG73;Q13427	729;744	E9PG73	E9PG73	Peptidyl-prolyl cis-trans isomerase G	PPIG	ENDHVHEKNKKFDHESSPGTDEDKSG_____		0.00892221	0.10066	-0.383742	-3.2365	-1.01099	-0.967527	-0.614035	-0.559917	-0.857229	-1.21799	-0.560171	-0.418879	-0.73451	-0.417957	-0.30423	-0.489496	S	2	___1		Peptidyl-prolyl cis-trans isomerase G					Phosphoserine					In isoform 2.		b-Adrenergic Receptor kinase substrate motif;Casein kinase I substrate motif;G protein-coupled receptor kinase 1 substrate motif	0.997578	1.46357e-12	194.86	163.64	138.39	1.6207	UID552
230	E9PGM9;P78332;F8WCA5	230;362;230	E9PGM9	E9PGM9	RNA-binding protein 6	RBM6	VAFEHESPADFQNSQSPVQDQDKSQLSGREE		0.760247	0.903453	0.0623868	0.317333	1.06415	NaN	0.97208	0.9137	1.21957	0.671089	NaN	0.606659	1.09808	0.568304	1.34989	NaN	S	3	___1		RNA-binding protein 6					Phosphoserine					In isoform 2.		ERK1,2 kinase substrate motif;GSK-3, ERK1, ERK2, CDK5 substrate motif;WW domain binding motif	0.969601	9.98405e-09	118.77	109.8	118.77	-0.24553	UID555
893	E9PGM9;P78332	893;1025	E9PGM9	E9PGM9	RNA-binding protein 6	RBM6	KGRGNDRREKLQSFDSPERKRIKYSRETDSD		0.303465	0.616747	0.161252	1.09137	0.662689	0.273924	0.380493	0.462959	NaN	0.772406	0.616032	0.680744	0.233143	0.216108	0.393532	-0.0441036	S	2	___1		RNA-binding protein 6					Phosphoserine					In isoform 3.		b-Adrenergic Receptor kinase substrate motif;Casein kinase II substrate motif;Cdc2 kinase substrate motif;CDK kinase substrate motif;CDK1,2,4,6 kinase substrate motif;ERK1,2 kinase substrate motif;GSK-3, ERK1, ERK2, CDK5 substrate motif;WW domain binding motif	1	9.54884e-06	208.56	116.69	189.58	2.3971	UID556
91	E9PHI6;Q9Y6G9;C9JGM7	91;207;156	E9PHI6	E9PHI6	Cytoplasmic dynein 1 light intermediate chain 1	DYNC1LI1	RDFQEYVEPGEDFPASPQRRNTASQEDKDDS		0.122617	0.37822	0.332766	1.7038	0.737881	0.851057	1.21488	0.629246	1.44243	1.18299	0.977024	0.241079	0.660448	0.487488	1.01887	NaN	S	2	___1	DLIC	Cytoplasmic dynein 1 light intermediate chain 1					Phosphoserine							Cdc2 kinase substrate motif;CDK kinase substrate motif;CDK1,2,4,6 kinase substrate motif;ERK1,2 kinase substrate motif;GSK-3, ERK1, ERK2, CDK5 substrate motif;WW domain binding motif	1	1.00679e-29	228.46	213.42	221.37	0.49714	UID557
400	E9PHI6;Q9Y6G9	400;516	E9PHI6	E9PHI6	Cytoplasmic dynein 1 light intermediate chain 1	DYNC1LI1	RITRKPVTVSPTTPTSPTEGEAS________		0.0494147	0.227231	0.396587	2.23508	1.77123	1.59053	1.70473	1.44098	1.7381	1.92614	1.94699	1.35338	1.47592	1.0039	1.2239	0.788097	S	2	___1	DLIC	Cytoplasmic dynein 1 light intermediate chain 1					Phosphoserine							Casein kinase II substrate motif;ERK1,2 kinase substrate motif;GSK-3, ERK1, ERK2, CDK5 substrate motif;WW domain binding motif	0.997104	5.04989e-62	314.11	291.2	314.11	1.9869	UID558
305	E9PHI6;Q9Y6G9	305;421	E9PHI6	E9PHI6	Cytoplasmic dynein 1 light intermediate chain 1	DYNC1LI1	PRTPNRSVSSNVASVSPIPAGSKKIDPNMKA		0.140284	0.40206	0.505529	1.63692	-2.20887	-2.48823	-1.96438	-2.35084	-1.68575	-1.60122	-1.78401	-2.54796	-2.56828	-3.32139	NaN	NaN	S	2	___1	DLIC	Cytoplasmic dynein 1 light intermediate chain 1					Phosphoserine							ERK1,2 kinase substrate motif;G protein-coupled receptor kinase 1 substrate motif;GSK-3, ERK1, ERK2, CDK5 substrate motif;WW domain binding motif	0.893189	2.01005e-05	114.56	96.228	73.848	0.19464	UID559
739	E9PHV5;P28290;E7EUL7	739;739;248	E9PHV5	E9PHV5	Sperm-specific antigen 2	SSFA2	RYLFAKAGYPLRRSQSLPTTLLSPVRVVSSV		0.420155	0.719888	-0.13282	-0.84977	-1.04347	NaN	-1.14281	-0.509815	-1.03364	-0.911821	-0.815832	-0.975098	-0.413652	-0.731827	-1.04105	NaN	S	2	___1		Sperm-specific antigen 2					Phosphoserine							14-3-3 domain binding motif;Calmodulin-dependent protein kinase II alpha substrate motif;Calmodulin-dependent protein kinase II substrate motif;Calmodulin-dependent protein kinase IV substrate motif;Casein kinase II substrate motif;Chk1 kinase substrate motif;Doublecortin kinase-1 kinase substrate motif;G protein-coupled receptor kinase 1 substrate motif;Phosphorylase kinase substrate motif;PKA k…	0.999578	3.88866e-07	130.24	111.92	130.24	0.93038	UID560
92	E9PHV5;P28290	92;92	E9PHV5	E9PHV5	Sperm-specific antigen 2	SSFA2	KIAIWLKDCRTPLGASLDEQSSSTLKGVLVR		0.0280555	0.169129	-0.594546	-2.67702	-3.07986	-2.5052	-2.58631	-1.97099	-2.72367	-2.28962	NaN	-2.30281	-1.98883	-1.7195	-1.71443	NaN	S	2	___1		Sperm-specific antigen 2					Phosphoserine					In isoform 2.		Casein kinase II substrate motif	0.965119	0.00671608	58.676	47.203	58.676	-0.023511	UID561
36	E9PJ38;E9PND3;E9PN10;O00559	36;36;36;36	E9PJ38	E9PJ38	Receptor-binding cancer antigen expressed on SiSo cells	EBAG9	FLKRLICRSGRGRKLSGDQITLPTTVDYSSV		0.143256	0.407645	0.368065	1.58851	3.06165	3.14068	2.41556	2.76372	2.61004	2.71668	2.66804	2.68948	2.2714	2.48793	2.88805	1.49506	S	2	___1		Receptor-binding cancer antigen expressed on SiSo cells					Phosphoserine						Cytoplasmic	14-3-3 domain binding motif;Akt kinase substrate motif;Calmodulin-dependent protein kinase II substrate motif;MAPKAPK1 kinase substrate motif;PKA kinase substrate motif;PKC epsilon kinase substrate motif;PKC kinase substrate motif	1	1.07486e-82	330.89	229.36	294.37	0.1493	UID562
102	E9PJF4;P54105	102;102	E9PJF4	E9PJF4	Methylosome subunit pICln	CLNS1A	EEESKEPVADEEEEDSDDDVEPITEFRFVPS		0.886698	0.95866	0.0621024	0.14776	3.54664	NaN	5.11719	5.27632	4.94462	4.83888	NaN	NaN	5.21491	4.78651	4.78035	3.94873	S	3	___1	Voldacs	Methylosome subunit pICln					Phosphoserine							b-Adrenergic Receptor kinase substrate motif;Casein kinase I substrate motif;Casein kinase II substrate motif;Pyruvate dehydrogenase kinase substrate motif	1	2.73798e-30	209.18	197.65	209.18	-2.3282	UID563
133	E9PK01;E9PRY8;P29692;E9PQ49;E9PI39;A0A087X1X7;E9PL71;E9PPR1;E9PL12;E9PQZ1;E9PK06	133;549;133;133;133;499;109;133;133;90;114	E9PK01	E9PK01	Elongation factor 1-delta	EEF1D	SSPGHRATAPQTQHVSPMRQVEPPAKKPATP		0.0318347	0.181862	0.578611	2.49285	2.87248	2.92355	2.90133	3.30391	3.29685	3.32499	1.54649	2.73573	2.6971	2.48762	3.09603	2.58848	S	2	___1		Elongation factor 1-delta					Phosphoserine							Cdc2 kinase substrate motif;CDK kinase substrate motif;CDK1,2,4,6 kinase substrate motif;ERK1,2 kinase substrate motif;GSK-3, ERK1, ERK2, CDK5 substrate motif;WW domain binding motif	1	8.68297e-28	244.18	208.92	205.45	-0.13026	UID564	CDK1
162	E9PK01;E9PRY8;P29692;E9PQ49;E9PI39;A0A087X1X7;E9PL71;E9PQZ1;H0YE72	162;578;162;162;162;528;138;119;37	E9PK01	E9PK01	Elongation factor 1-delta	EEF1D	TPAEDDEDDDIDLFGSDNEEEDKEAAQLREE		0.431313	0.729993	0.358164	0.823853	5.47115	5.55289	6.44421	6.23589	5.87574	5.84415	NaN	3.84723	6.29628	6.15204	5.87132	5.56233	S	4	___1	EF-1_beta_acid	Elongation factor 1-delta					Phosphoserine| by CK2							Casein kinase II substrate motif	1	1.33377e-69	278.96	261.95	151.24	-0.74923	UID565	CK2A1
175	E9PQN2;E9PKI6;E9PK91;Q9NYF8;A0A1W2PQ43;E9PK09;E9PJA7	175;177;177;177;177;177;175	E9PQN2	E9PQN2	Bcl-2-associated transcription factor 1	BCLAF1	QEKQTKKAEGEPQEESPLKSKSQEEPKDTFE		0.166085	0.433597	-0.287863	-1.49383	1.97124	1.85232	2.04904	2.20103	2.12147	2.45251	2.76724	2.9512	2.14382	2.35063	2.38811	1.77379	S	3	___1	THRAP3_BCLAF1	Bcl-2-associated transcription factor 1					Phosphoserine							b-Adrenergic Receptor kinase substrate motif;Cdc2 kinase substrate motif;CDK kinase substrate motif;CDK1,2,4,6 kinase substrate motif;ERK1,2 kinase substrate motif;G protein-coupled receptor kinase 1 substrate motif;GSK3 kinase substrate motif;GSK-3, ERK1, ERK2, CDK5 substrate motif;WW domain binding motif	1	3.05928e-68	356.15	308.97	138.87	0.22812	UID566
383	E9PQN2;E9PKI6;E9PK91;Q9NYF8;A0A1W2PQ43;E9PK09	383;385;385;385;385;385	E9PQN2	E9PQN2	Bcl-2-associated transcription factor 1	BCLAF1	RAEGEWEDQEALDYFSDKESGKQKFNDSEGD		0.438586	0.732239	-0.199147	-0.806732	4.43283	4.49275	4.13046	4.02921	3.96508	3.58693	3.54898	4.05263	4.7478	4.87415	4.54996	4.05862	S	2	___1	THRAP3_BCLAF1	Bcl-2-associated transcription factor 1					Phosphoserine					In isoform 4.		Casein kinase I substrate motif;Casein kinase II substrate motif;G protein-coupled receptor kinase 1 substrate motif;GSK3 kinase substrate motif;PKA kinase substrate motif;PKC kinase substrate motif	1	2.48702e-60	310.15	286.73	310.15	-2.9595	UID567
387	E9PQN2;E9PKI6;E9PK91;Q9NYF8;A0A1W2PQ43;E9PK09	387;389;389;389;389;389	E9PQN2	E9PQN2	Bcl-2-associated transcription factor 1	BCLAF1	EWEDQEALDYFSDKESGKQKFNDSEGDDTEE		0.691317	0.871789	-0.442656	-0.408781	0.218512	0.099575	0.291037	-3.61862	-0.986784	-3.80988	-3.06432	-0.0183067	0.784588	0.755669	-3.20819	-0.399664	S	3	___1	THRAP3_BCLAF1	Bcl-2-associated transcription factor 1					Phosphoserine					In isoform 4.		b-Adrenergic Receptor kinase substrate motif;Casein kinase I substrate motif;MAPKAPK2 kinase substrate motif;PKA kinase substrate motif;PKC kinase substrate motif	0.957081	2.1573e-44	240.86	226.05	230.69	0.83016	UID568
688	E9PQN2;E9PKI6;E9PK91;Q9NYF8;E9PK09	688;690;690;690;689	E9PQN2	E9PQN2	Bcl-2-associated transcription factor 1	BCLAF1	FKEENQKGDKKLRCDSADLRHDIDRRRKERS		0.445865	0.735525	0.201539	0.797184	-1.04974	NaN	-1.52243	-1.03188	-0.80409	-1.2826	-1.84451	-0.695776	-1.5266	-1.08717	-0.951902	-1.93217	S	2	___1	THRAP3_BCLAF1	Bcl-2-associated transcription factor 1					Phosphoserine							14-3-3 domain binding motif;AMP-activated protein kinase 2 substrate motif;b-Adrenergic Receptor kinase substrate motif;Calmodulin-dependent protein kinase II substrate motif;MAPKAPK1 kinase substrate motif;PKA kinase substrate motif;PKC kinase substrate motif	1	0.0174272	60.828	19.38	60.828	-0.45212	UID569
510	E9PQN2;E9PKI6;E9PK91;Q9NYF8;A0A1W2PQ43;E9PK09	510;512;512;512;512;512	E9PQN2	E9PQN2	Bcl-2-associated transcription factor 1	BCLAF1	PEQVKSEKLKDLFDYSPPLHKNLDAREKSTF		0.181889	0.457271	-0.253946	-1.43473	3.14615	3.01181	3.01825	2.97918	3.1481	3.37749	3.94512	3.53574	3.17897	3.32234	3.49827	2.72421	S	2	___1	THRAP3_BCLAF1	Bcl-2-associated transcription factor 1					Phosphoserine							ERK1,2 kinase substrate motif;GSK-3, ERK1, ERK2, CDK5 substrate motif;WW domain binding motif	1	5.95317e-25	262.24	222.82	229	-0.94967	UID570
196	E9PQN2;E9PKI6;E9PK91;Q9NYF8;A0A1W2PQ43;E9PK09;E9PJA7	196;198;198;198;198;198;196	E9PQN2	E9PQN2	Bcl-2-associated transcription factor 1	BCLAF1	SQEEPKDTFEHDPSESIDEFNKSSATSGDIW		0.0952405	0.33081	-0.340266	-1.92773	NaN	NaN	-1.23734	-1.60627	-1.01879	-1.00545	-0.578432	-0.639275	-1.10063	-1.08053	-0.984613	NaN	S	3	___1	THRAP3_BCLAF1	Bcl-2-associated transcription factor 1					Phosphoserine							b-Adrenergic Receptor kinase substrate motif;Casein kinase II substrate motif	0.84257	0.00191589	73.91	55.077	60.564	-0.19495	UID571
656	E9PQN2;E9PKI6;E9PK91;Q9NYF8;A0A1W2PQ43;E9PK09	656;658;658;658;658;657	E9PQN2	E9PQN2	Bcl-2-associated transcription factor 1	BCLAF1	STRQKSPEIHRRIDISPSTLRKHTRLAGEER		0.374641	0.682781	-0.196832	-0.929261	5.1895	5.09222	5.02951	5.09165	5.07624	5.29754	5.86353	5.60866	5.07935	5.43875	5.54123	4.42613	S	2	___1	THRAP3_BCLAF1	Bcl-2-associated transcription factor 1					Phosphoserine							Casein kinase II substrate motif;ERK1,2 kinase substrate motif;GSK-3, ERK1, ERK2, CDK5 substrate motif;WW domain binding motif	1	4.14561e-12	258.65	168.78	200.68	-3.4107	UID573
181	E9PQN2;E9PKI6;E9PK91;Q9NYF8;A0A1W2PQ43;E9PK09;E9PJA7	181;183;183;183;183;183;181	E9PQN2	E9PQN2	Bcl-2-associated transcription factor 1	BCLAF1	KAEGEPQEESPLKSKSQEEPKDTFEHDPSES		0.950656	0.986254	-0.0134068	-0.063453	1.29299	1.12955	1.26623	0.943743	1.44909	0.630335	1.50122	1.63247	0.859972	1.29393	1.01078	0.494017	S	3	___1	THRAP3_BCLAF1	Bcl-2-associated transcription factor 1												ATM kinase substrate motif;Casein kinase II substrate motif;DNA dependent Protein kinase substrate motif;G protein-coupled receptor kinase 1 substrate motif;PKA kinase substrate motif;PKC kinase substrate motif	1	6.43884e-37	224.79	202.57	224.79	1.1689	UID577
220	E9PQN2;E9PKI6;E9PK91;Q9NYF8;A0A1W2PQ43;E9PK09;E9PJA7	220;222;222;222;222;222;220	E9PQN2	E9PQN2	Bcl-2-associated transcription factor 1	BCLAF1	ATSGDIWPGLSAYDNSPRSPHSPSPIATPPS		0.0863524	0.31113	-0.993634	-1.92507	NaN	-1.86422	1.18258	0.762318	0.534023	0.274122	1.41398	1.14114	1.45817	1.36648	1.30445	0.344187	S	2	___1	THRAP3_BCLAF1	Bcl-2-associated transcription factor 1					Phosphoserine							Casein kinase II substrate motif;ERK1,2 kinase substrate motif;G protein-coupled receptor kinase 1 substrate motif;Growth associated histone HI kinase substrate motif;GSK-3, ERK1, ERK2, CDK5 substrate motif;PKA kinase substrate motif;PKC kinase substrate motif;WW domain binding motif	0.999942	3.50057e-51	263.19	241.56	263.19	-0.27584	UID579
529	E9PQN2;E9PKI6;E9PK91;Q9NYF8;A0A1W2PQ43;E9PK09;E9PJA7	529;531;531;531;531;531;356	E9PQN2	E9PQN2	Bcl-2-associated transcription factor 1	BCLAF1	HKNLDAREKSTFREESPLRIKMIASDSHRPE		0.382768	0.686553	-0.160771	-0.912918	2.67222	2.50222	2.06029	2.17475	2.72593	3.0984	2.40661	2.92154	2.61524	2.93609	2.67007	2.64888	S	3	___1	THRAP3_BCLAF1	Bcl-2-associated transcription factor 1					Phosphoserine							14-3-3 domain binding motif;AMP-activated protein kinase substrate motif;b-Adrenergic Receptor kinase substrate motif;Calmodulin-dependent protein kinase II substrate motif;Cdc2 kinase substrate motif;CDK kinase substrate motif;CDK1,2,4,6 kinase substrate motif;CLK1 kinase substrate motif;ERK1,2 kinase substrate motif;GSK-3, ERK1, ERK2, CDK5 substrate motif;HMGCoA Reductase kinase substrate motif…	1	7.72196e-06	158.02	129.21	158.02	0.2928	UID582	GSK3B
283	E9PQN2;E9PKI6;E9PK91;Q9NYF8;A0A1W2PQ43;E9PK09;E9PJA7;H0YF00	283;285;285;285;285;285;283;26	E9PQN2	E9PQN2	Bcl-2-associated transcription factor 1	BCLAF1	ERSGSGSVGNGSSRYSPSQNSPIHHIPSRRS		0.487791	0.768645	-0.223586	-0.720376	3.3655	3.09702	2.07937	1.81855	2.94467	2.07912	3.23466	3.20388	2.35301	2.32913	2.9031	2.70198	S	2	___1	THRAP3_BCLAF1	Bcl-2-associated transcription factor 1					Phosphoserine							Casein kinase II substrate motif;ERK1,2 kinase substrate motif;GSK-3, ERK1, ERK2, CDK5 substrate motif;MAPKAPK2 kinase substrate motif;PKA kinase substrate motif;PKC kinase substrate motif;WW domain binding motif	0.999978	3.63036e-26	245.48	220.63	202.81	-0.44944	UID583
288	E9PQN2;E9PKI6;E9PK91;Q9NYF8;A0A1W2PQ43;E9PK09;E9PJA7;H0YF00	288;290;290;290;290;290;288;31	E9PQN2	E9PQN2	Bcl-2-associated transcription factor 1	BCLAF1	GSVGNGSSRYSPSQNSPIHHIPSRRSPAKTI		0.0867234	0.309624	-0.453639	-1.89929	4.41664	4.28634	4.04282	3.67987	4.26428	3.75402	5.25682	5.03071	4.00752	4.15913	4.3118	4.39983	S	2	___1	THRAP3_BCLAF1	Bcl-2-associated transcription factor 1					Phosphoserine							ERK1,2 kinase substrate motif;GSK-3, ERK1, ERK2, CDK5 substrate motif;WW domain binding motif	1	3.09298e-41	284.07	257.36	284.07	0.24862	UID585
141	E9PPF9;E9PLD2;Q9H019	141;141;238	E9PPF9	E9PPF9	Mitochondrial fission regulator 1-like	MTFR1L	SSSEEDDCVSLSKASSFADMMGILKDFHRMK		0.882574	0.957426	-0.0416132	-0.151955	0.50412	0.576298	-0.319864	0.575399	0.825598	0.991211	0.338322	0.655554	0.0415459	0.542421	1.25752	NaN	S	2	___1	Mito_fiss_reg	Mitochondrial fission regulator 1-like					Phosphoserine					In isoform 2.		Calmodulin-dependent protein kinase II substrate motif;Casein kinase II substrate motif;Chk1 kinase substrate motif;MAPKAPK2 kinase substrate motif;MDC1 BRCT domain binding motif;PKA kinase substrate motif;PKC kinase substrate motif;Plk1 PBD domain binding motif;Pyruvate dehydrogenase kinase substrate motif	0.999814	4.72532e-07	137.4	72.452	137.4	-0.88248	UID587
6	E9PPF9;E9PLD2;Q9H019;E9PNJ0;E9PPQ0;E9PRW1;E9PSD6;C9JF50;E9PLU1;E9PRK5	6;6;103;6;6;103;103;103;103;103	E9PPF9	E9PPF9	Mitochondrial fission regulator 1-like	MTFR1L	__________MQRNASVPNLRGSEERLLALK		0.307969	0.61775	-0.512104	-1.0742	0.205969	0.239969	-2.09478	-0.829721	-0.790323	-0.654705	0.350132	0.701248	-1.41228	-0.336748	0.443342	-0.596653	S	2	___1	Mito_fiss_reg	Mitochondrial fission regulator 1-like					Phosphoserine							14-3-3 domain binding motif;Calmodulin-dependent protein kinase I substrate motif;Calmodulin-dependent protein kinase II alpha substrate motif;Calmodulin-dependent protein kinase II substrate motif;Calmodulin-dependent protein kinase IV substrate motif;Chk1 kinase substrate motif;Phosphorylase kinase substrate motif;PKA kinase substrate motif;PKC kinase substrate motif	1	0.000151988	128.28	101.49	66.056	0.2	UID588
16	E9PS47;E9PLE4;Q9BVG9	16;16;16	E9PS47	E9PS47	Phosphatidylserine synthase 2	PTDSS2	MRRGERRDAGGPRPESPVPAGRASLEEPPDG		0.128229	0.388382	0.30917	1.6584	1.34125	1.57524	1.25741	1.61888	1.52343	2.00804	1.6531	1.48807	0.617411	1.18577	1.45488	1.07001	S	2	___1		Phosphatidylserine synthase 2					Phosphoserine						Cytoplasmic	14-3-3 domain binding motif;b-Adrenergic Receptor kinase substrate motif;Calmodulin-dependent protein kinase II substrate motif;ERK1,2 kinase substrate motif;G protein-coupled receptor kinase 1 substrate motif;GSK-3, ERK1, ERK2, CDK5 substrate motif;PKA kinase substrate motif;PKC kinase substrate motif;WW domain binding motif	1	1.32634e-12	155.06	117.35	143.93	0.36595	UID589
17	E9PQA1;E9PM92;O00193	17;17;17	E9PQA1	E9PQA1	Small acidic protein	C11orf58;SMAP	SAARESHPHGVKRSASPDDDLGSSNWEAADL		0.693009	0.870962	-0.16268	-0.414371	0.173204	0.4044	NaN	0.814529	1.06954	NaN	NaN	-0.125723	1.33415	0.654448	1.24953	NaN	S	2	___1		Small acidic protein					Phosphoserine							14-3-3 domain binding motif;Calmodulin-dependent protein kinase II substrate motif;Calmodulin-dependent protein kinase IV substrate motif;Casein kinase II substrate motif;Chk1 kinase substrate motif;ERK1,2 kinase substrate motif;GSK-3, ERK1, ERK2, CDK5 substrate motif;PKA kinase substrate motif;PKC kinase substrate motif;Pyruvate dehydrogenase kinase substrate motif;WW domain binding motif	0.942381	3.23235e-14	169.84	148.59	169.84	0.27022	UID590
650	E9PMG1;H0YDT0;Q96D71;H0YCR2	650;667;709;88	E9PMG1	E9PMG1	RalBP1-associated Eps domain-containing protein 1	REPS1	TPLAPPPKPVRRRLKSEDELRPEVDEHTQKT		0.983924	0.992728	0.0144472	0.0210034	0.243637	0.45849	NaN	-0.0368214	-1.61369	NaN	-0.279018	0.394114	NaN	NaN	-1.66039	0.539116	S	3	___1		RalBP1-associated Eps domain-containing protein 1					Phosphoserine		Interaction with RALBP1					14-3-3 domain binding motif;Akt kinase substrate motif;BARD1 BRCT domain binding motif;Calmodulin-dependent protein kinase II substrate motif;Casein kinase II substrate motif;G protein-coupled receptor kinase 1 substrate motif;MAPKAPK1 kinase substrate motif;PKA kinase substrate motif;PKC kinase substrate motif;ZIP kinase substrate motif	1	4.15533e-05	100.19	82.438	100.19	2.7518	UID592
84	E9PNJ4;Q13586;G0XQ39	84;257;257	E9PNJ4	E9PNJ4	Stromal interaction molecule 1	STIM1	KKMMKDLEGLHRAEQSLHDLQERLHKAQEEH		0.886502	0.959007	0.0272306	0.146417	-0.721067	-0.800127	-0.513489	-0.535091	-0.191675	-0.0739574	-0.444546	-0.259895	-0.940788	-0.240448	-0.17156	-0.941553	S	2	___1		Stromal interaction molecule 1	+				Phosphoserine						Cytoplasmic	Casein kinase II substrate motif;Plk1 kinase substrate motif;Pyruvate dehydrogenase kinase substrate motif	1	7.18887e-07	138.87	105.18	86.944	-0.37043	UID594
346	E9PNJ4;Q13586;H0YDB2;G0XQ39	346;519;281;625	E9PNJ4	E9PNJ4	Stromal interaction molecule 1	STIM1	TEPQHGLGSQRDLTHSDSESSLHMSDRQRVA		0.691793	0.871797	-0.394119	-0.413245	-4.30506	NaN	-1.18819	-0.409672	-0.457792	0.0169811	-1.99984	-0.813276	NaN	-0.481869	-0.203527	NaN	S	3	___1		Stromal interaction molecule 1					Phosphoserine					In isoform 2.	Cytoplasmic	Casein kinase II substrate motif;G protein-coupled receptor kinase 1 substrate motif;GSK3 kinase substrate motif	0.977841	4.95303e-13	154.69	133.95	154.69	-1.97	UID595
402	E9PNJ4;Q13586;H0YDB2;G0XQ39	402;575;337;681	E9PNJ4	E9PNJ4	Stromal interaction molecule 1	STIM1	IEGVHPGSLVEKLPDSPALAKKALLALNHGL		0.488577	0.769252	0.274983	0.722086	-0.973827	-1.22647	-1.55031	-1.24238	-0.303627	-0.250771	-0.254616	-1.50587	-2.12907	-1.40114	-0.707048	NaN	S	2	___1		Stromal interaction molecule 1					Phosphoserine					In isoform 2.	Cytoplasmic	b-Adrenergic Receptor kinase substrate motif;ERK1,2 kinase substrate motif;G protein-coupled receptor kinase 1 substrate motif;GSK-3, ERK1, ERK2, CDK5 substrate motif;PKA kinase substrate motif;WW domain binding motif	1	0.000283813	104.82	70.021	104.82	-0.018431	UID596	ERK2
445	E9PNJ4;Q13586;H0YDB2;G0XQ39	445;618;380;724	E9PNJ4	E9PNJ4	Stromal interaction molecule 1	STIM1	APPGGSPHLDSSRSHSPSSPDPDTPSPVGDS		0.0708564	0.272276	0.447199	2.04788	1.16189	1.12857	0.398523	0.811399	0.943447	1.12408	NaN	0.670403	0.61343	0.525095	0.85438	-0.259371	S	2	___1		Stromal interaction molecule 1		Pro/Ser-rich								In isoform 2.	Cytoplasmic	14-3-3 domain binding motif;Calmodulin-dependent protein kinase II substrate motif;Casein kinase II substrate motif;ERK1,2 kinase substrate motif;G protein-coupled receptor kinase 1 substrate motif;GSK-3, ERK1, ERK2, CDK5 substrate motif;MAPKAPK2 kinase substrate motif;PKA kinase substrate motif;PKC kinase substrate motif;WW domain binding motif	0.875881	1.99113e-09	146.72	136.09	70.235	-1.8349	UID597
32	H0YN41;E9PPJ1;Q8NG31	32;32;32	H0YN41	H0YN41	Protein CASC5	CASC5	RPVRRRHSSILKPPRSPLQDLRGPHLDTETP		0.364598	0.674526	-0.189309	-0.961202	-2.30072	-1.93538	-2.36755	-2.44695	NaN	-2.2822	-1.62684	-1.66812	-2.41477	-2.36592	-2.31059	NaN	S	2	___1		Protein CASC5					Phosphoserine		Interaction with BUB1 and BUB1B					ERK1,2 kinase substrate motif;Growth associated histone HI kinase substrate motif;GSK-3, ERK1, ERK2, CDK5 substrate motif;PKA kinase substrate motif;WW domain binding motif	1	0.0232625	57.59	31.206	57.59	-0.45459	UID598
124	E9PRB3;J3KP30;Q5QJE6	124;117;117	E9PRB3	E9PRB3	Deoxynucleotidyltransferase terminal-interacting protein 2	DNTTIP2	TILRVTRRRQILIACSPVSSVRKKPKVTPTK		0.552128	0.806181	-0.166254	-0.617624	-1.44554	-1.66194	-1.57488	-1.74094	-1.37441	-0.763355	-0.588823	-0.94025	-1.47188	-2.00878	-1.29322	NaN	S	2	___1		Deoxynucleotidyltransferase terminal-interacting protein 2					Phosphoserine							Casein kinase II substrate motif;ERK1,2 kinase substrate motif;G protein-coupled receptor kinase 1 substrate motif;GSK3 kinase substrate motif;GSK-3, ERK1, ERK2, CDK5 substrate motif;WW domain binding motif	0.970187	0.000363367	102.73	70.229	78.763	0.55117	UID599
1066	E9PRF4;Q15047	1066;1066	E9PRF4	E9PRF4	Histone-lysine N-methyltransferase SETDB1	SETDB1	MSVVTESSRNYGYNPSPVKPEGLRRPPSKTS		0.0656901	0.26214	-0.472609	-2.09461	-1.16407	-1.49261	-1.54699	-1.74663	-0.860744	-1.2162	-0.793455	-0.594398	NaN	-0.747135	-0.574364	-1.61697	S	2	___1	SET	Histone-lysine N-methyltransferase SETDB1				SET	Phosphoserine					In isoform 2.		Cdc2 kinase substrate motif;CDK kinase substrate motif;CDK1,2,4,6 kinase substrate motif;DNA dependent Protein kinase substrate motif;ERK1,2 kinase substrate motif;G protein-coupled receptor kinase 1 substrate motif;GSK-3, ERK1, ERK2, CDK5 substrate motif;WW domain binding motif	0.999997	0.000343094	94.551	77.116	94.551	0.42531	UID600	CDK2
1327	F1T0I1;J3KNL6;O15027;X6RGP5	1327;1327;1149;49	F1T0I1	F1T0I1	Protein transport protein Sec16A	SEC16A	EKRDNNWRYDPRFTGSFDDDPDPHRDPYGEE		0.568892	0.818443	-0.187075	-0.589054	0.302572	0.613413	0.0022049	-0.28027	0.139637	-1.23216	0.209021	0.425224	0.00965309	0.200699	0.532118	-0.708864	S	3	___1		Protein transport protein Sec16A					Phosphoserine		Required for endoplasmic reticulum localization					Casein kinase II substrate motif;Pyruvate dehydrogenase kinase substrate motif	0.999584	8.16031e-09	133.76	116.54	127.83	-0.92816	UID603
1773	H0Y4W2;F2Z2U4;Q9Y4A5	1773;2032;2051	H0Y4W2	H0Y4W2	Transformation/transcription domain-associated protein	TRRAP	GEGVNSVSSSIKRGLSVDSAQEVKRFRTATG		0.318476	0.624717	0.378364	1.0499	0.618521	0.606142	-0.196583	-0.00790405	0.00559616	0.336946	0.948877	0.738474	-0.419155	-0.550821	-0.499447	-1.12539	S	2	___1		Transformation/transcription domain-associated protein					Phosphoserine		Interaction with TP53		Bipartite nuclear localization signal			14-3-3 domain binding motif;Calmodulin-dependent protein kinase II alpha substrate motif;Calmodulin-dependent protein kinase II substrate motif;Calmodulin-dependent protein kinase IV substrate motif;Casein kinase II substrate motif;Chk1 kinase substrate motif;G protein-coupled receptor kinase 1 substrate motif;Phosphorylase kinase substrate motif;PKA kinase substrate motif;PKC kinase substrate mo…	1	1.12264e-08	208.79	161.84	136.7	0.12134	UID605
43	F2Z2Z8;Q5T173;Q96AQ6	43;43;43	F2Z2Z8	F2Z2Z8	Pre-B-cell leukemia transcription factor-interacting protein 1	PBXIP1	SRMDPESERALQAPHSPSKTDGKELAGTMDG		0.317198	0.623991	-0.352305	-1.05282	-1.67517	-2.14462	-2.36041	-1.76693	-2.00827	-2.73421	-1.61529	-0.466814	-2.41098	-2.36291	-1.64972	-2.07006	S	2	___1		Pre-B-cell leukemia transcription factor-interacting protein 1					Phosphoserine							Casein kinase II substrate motif;Cdc2 kinase substrate motif;CDK kinase substrate motif;CDK1,2,4,6 kinase substrate motif;ERK1,2 kinase substrate motif;G protein-coupled receptor kinase 1 substrate motif;GSK-3, ERK1, ERK2, CDK5 substrate motif;WW domain binding motif	0.794684	0.0316132	59.155	37.691	45.879	-1.9239	UID606
47	F2Z3H0;F2Z3N9;H7C3L7;Q99543	47;47;36;47	F2Z3H0	F2Z3H0	DnaJ homolog subfamily C member 2;DnaJ homolog subfamily C member 2, N-terminally processed	DNAJC2	GRWFEAFVKRRNRNASASFQELEDKKELSEE		0.0383788	0.207915	0.528506	2.54507	-0.0790768	NaN	-0.162333	-0.156614	0.341476	0.369455	NaN	-0.268068	-0.447517	-0.972343	-0.17577	NaN	S	2	___1		DnaJ homolog subfamily C member 2;DnaJ homolog subfamily C member 2| N-terminally processed					Phosphoserine							14-3-3 domain binding motif;Akt kinase substrate motif;Calmodulin-dependent protein kinase II substrate motif;Casein kinase II substrate motif;MAPKAPK1 kinase substrate motif;PKA kinase substrate motif;PKC kinase substrate motif	1	9.39811e-12	222.45	178.08	53.448	-0.42336	UID609
365	F5GWN9;F8WE42;F5H101;Q76FK4	365;365;365;365	F5GWN9	F5GWN9	Nucleolar protein 8	NOL8	SLIGLGIKNRVSCHDSDDDIMRNDREYDSGD		0.00331698	0.0564828	0.909397	3.83035	-0.64567	-0.533636	-1.09816	-1.35883	-0.915258	-0.354204	-2.43859	-1.95798	-1.52023	-1.77353	-1.14305	-1.52876	S	2	___1		Nucleolar protein 8					Phosphoserine							AMP-activated protein kinase substrate motif;b-Adrenergic Receptor kinase substrate motif;Casein kinase II substrate motif;MAPKAPK2 kinase substrate motif;Pyruvate dehydrogenase kinase substrate motif	0.999995	0.000218037	115.83	102.13	115.83	-0.89437	UID611
1528	F5GWX5;A0A0C4DGG9;Q14839	1528;1560;1535	F5GWX5	F5GWX5	Chromodomain-helicase-DNA-binding protein 4	CHD4	ELAEVEENKKMSQPGSPSPKTPTPSTPGDTQ		0.016629	0.139348	-1.29118	-2.87139	1.2133	1.11552	0.543533	0.41464	0.436186	-1.34791	2.59748	2.21152	1.45823	1.20584	1.61179	1.0375	S	2	___1		Chromodomain-helicase-DNA-binding protein 4					Phosphoserine							Casein kinase II substrate motif;ERK1,2 kinase substrate motif;GSK-3, ERK1, ERK2, CDK5 substrate motif;MAPKAPK2 kinase substrate motif;WW domain binding motif	0.985563	8.52242e-06	140.63	121.37	89.231	-1.5928	UID613
1301	F5GWX5;A0A0C4DGG9;Q14839	1301;1305;1308	F5GWX5	F5GWX5	Chromodomain-helicase-DNA-binding protein 4	CHD4	GEEEEVEREIIKQEESVDPDYWEKLLRHHYE	+	0.00091398	0.0433684	-0.792833	-4.84553	-1.55996	-1.25271	-1.79533	-1.95387	-1.42806	-1.97546	-0.713751	-0.869364	-0.9601	-1.20606	-0.591059	NaN	S	2	___1	DUF1087	Chromodomain-helicase-DNA-binding protein 4												b-Adrenergic Receptor kinase substrate motif;PKA kinase substrate motif	0.999998	0.00135418	96.067	68.637	96.067	-1.5413	UID614
101	F5GWX5;A0A0C4DGG9;Q14839;F5H596;F5H6N4	101;105;108;101;108	F5GWX5	F5GWX5	Chromodomain-helicase-DNA-binding protein 4	CHD4	VEEEEEVALRSDSEGSDYTPGKKKKKKLGPK		0.0395418	0.208905	-1.31764	-2.40547	-2.00007	-1.9232	0.193195	NaN	-0.0645962	-0.311331	-0.401665	-0.18322	1.33748	1.20922	0.963995	0.0528297	S	2	___1		Chromodomain-helicase-DNA-binding protein 4												Casein kinase II substrate motif;G protein-coupled receptor kinase 1 substrate motif	1	2.4297e-16	255.24	237.57	255.24	-2.9045	UID615
193	F5GX09;Q5HYJ3	193;193	F5GX09	F5GX09	Protein FAM76B	FAM76B	HHHRHSSSHHKISNLSPEEEQGLWKQSHKSS		0.00656484	0.0858049	-0.728656	-3.64254	-0.335684	-0.594475	NaN	NaN	-0.69623	-0.527826	0.369114	-0.0252781	0.185579	0.542706	0.507368	-0.438875	S	2	___1	FAM76	Protein FAM76B					Phosphoserine							Casein kinase II substrate motif;ERK1,2 kinase substrate motif;GSK-3, ERK1, ERK2, CDK5 substrate motif;WW domain binding motif	1	1.79192e-16	220.46	168.59	220.46	-0.24537	UID616
14	H0YFI1;F5H479;F5GX19;F5H3Y3;Q6IAA8	14;27;27;27;27	H0YFI1	H0YFI1	Ragulator complex protein LAMTOR1	LAMTOR1	__XDREERKLLLDPSSPPTKALNGAEPNYHS		0.169076	0.437251	0.279563	1.4952	-0.603188	-0.451855	-0.799994	-0.623728	-0.237196	-0.338718	-0.345631	-0.424349	-1.2789	-1.0604	-0.834099	NaN	S	2	___1	LAMTOR	Ragulator complex protein LAMTOR1					Phosphoserine							Casein kinase I substrate motif;Casein kinase II substrate motif;ERK1,2 kinase substrate motif;GSK-3, ERK1, ERK2, CDK5 substrate motif;MDC1 BRCT domain binding motif;Plk1 PBD domain binding motif;WW domain binding motif	0.98808	1.62196e-07	168.02	99.123	168.02	1.6897	UID617
43	H0YFI1;F5H479;F5GX19;F5H3Y3;Q6IAA8	43;56;56;56;56	H0YFI1	H0YFI1	Ragulator complex protein LAMTOR1	LAMTOR1	HSLPSARTDEQALLSSILAKTASNIIDVSAA		0.0405631	0.211496	0.573263	2.38991	-1.72277	-1.71375	-2.68427	-2.03726	-1.7715	-1.62857	-1.98395	-2.60268	-2.97765	-2.71086	-2.22293	NaN	S	2	___1	LAMTOR	Ragulator complex protein LAMTOR1												MDC1 BRCT domain binding motif;Plk1 PBD domain binding motif	0.958619	3.66705e-07	131.35	110.57	131.35	0.89829	UID618
308	F5GXU9;F5H5P2;P12694	308;371;337	F5GXU9	F5GXU9	2-oxoisovalerate dehydrogenase subunit alpha, mitochondrial	BCKDHA	QPFLIEAMTYRIGHHSTSDDSSAYRSVDEVN		0.0873416	0.309284	-1.36531	-1.91796	1.0495	0.800703	0.506456	-2.69142	1.06753	0.36628	1.99777	2.589	NaN	1.16342	1.19603	0.796227	S	3	___1	E1_dh	2-oxoisovalerate dehydrogenase subunit alpha| mitochondrial					Phosphoserine							Branched chain alpha-ketoacid dehydrogenase kinase substrate motif;Casein kinase II substrate motif;Pyruvate dehydrogenase kinase substrate motif	0.992134	2.11371e-22	260.49	218.28	182.18	-0.64457	UID619	BCKDK
318	F5GXU9;F5H5P2;P12694	318;381;347	F5GXU9	F5GXU9	2-oxoisovalerate dehydrogenase subunit alpha, mitochondrial	BCKDHA	RIGHHSTSDDSSAYRSVDEVNYWDKQ_____		0.242303	0.547004	-0.465882	-1.24277	1.51856	1.33612	1.24327	1.46582	1.06536	-0.157501	1.7878	1.61327	1.90833	2.23538	1.42811	0.294024	S	2	___1	E1_dh	2-oxoisovalerate dehydrogenase subunit alpha| mitochondrial					Phosphoserine							Branched chain alpha-ketoacid dehydrogenase kinase substrate motif;Casein kinase II substrate motif;MAPKAPK2 kinase substrate motif	1	3.91843e-06	205.12	188.18	205.12	-0.37741	UID620	BCKDK
16	G3V1T9;I3L521;F5GXV8;F5GY08;J3KPD3;Q9Y580	16;134;137;136;137;136	G3V1T9	G3V1T9	RNA-binding protein 7	RBM7	MDNMTSSAQIIQRSFSSPENFQRQAVMNSAL		0.728342	0.886906	0.10585	0.358352	-0.30229	-0.468599	-1.50698	-1.31747	-1.11601	-0.847015	-0.326811	-0.724421	-1.53082	-1.42525	-1.15393	NaN	S	2	___1		RNA-binding protein 7												14-3-3 domain binding motif;Calmodulin-dependent protein kinase II substrate motif;Calmodulin-dependent protein kinase IV substrate motif;Casein kinase II substrate motif;Chk1 kinase substrate motif;PKA kinase substrate motif;PKC kinase substrate motif	0.985487	8.38621e-06	133.89	89.584	133.89	-1.7951	UID621
1003	F5GYF8;O43166	1003;1549	F5GYF8	F5GYF8	Signal-induced proliferation-associated 1-like protein 1	SIPA1L1	KSTIEEDLKKLIDLESPTPESQKSFKFHALS		0.891544	0.961167	0.0307132	0.140754	-1.48127	-1.65465	-1.98529	-1.48166	-1.743	-1.04315	-1.33612	-1.30791	-1.6326	-2.10556	NaN	NaN	S	2	___1	SPAR_C	Signal-induced proliferation-associated 1-like protein 1					Phosphoserine							b-Adrenergic Receptor kinase substrate motif;Casein kinase I substrate motif;Casein kinase II substrate motif;ERK1,2 kinase substrate motif;GSK-3, ERK1, ERK2, CDK5 substrate motif;WW domain binding motif	0.996623	2.19882e-05	116.84	84.775	95.631	1.2741	UID622
149	F5GZK9;Q8IZD4	149;275	F5GZK9	F5GZK9	mRNA-decapping enzyme 1B	DCP1B	QQEKLPIRQGVVRSLSYEEPRRHSPPIEKQL		0.0235389	0.160067	0.326582	2.72179	-0.328205	-0.521105	-0.131069	-0.248421	-0.0810413	0.184641	-0.438425	-0.458544	-0.706045	-0.388699	-0.578863	NaN	S	2	___1		mRNA-decapping enzyme 1B												14-3-3 domain binding motif;Calmodulin-dependent protein kinase II alpha substrate motif;Calmodulin-dependent protein kinase II substrate motif;Calmodulin-dependent protein kinase IV substrate motif;Casein kinase II substrate motif;Chk1 kinase substrate motif;G protein-coupled receptor kinase 1 substrate motif;PKA kinase substrate motif;PKC kinase substrate motif	0.999993	0.000149777	163.16	117.16	163.16	0.39343	UID624
23	F5H452;Q5JSB6;Q5JSB5;Q14186	23;23;23;23	F5H452	F5H452	Transcription factor Dp-1	TFDP1	IEANGELKVFIDQNLSPGKGVVSLVAVHPST		0.920682	0.975123	0.0102708	0.102404	-0.869576	-0.784924	-0.824518	-0.579231	-0.614531	-0.614946	-0.418247	-0.841269	-0.911818	-0.838539	-0.614586	NaN	S	2	___1	E2F_TDP	Transcription factor Dp-1					Phosphoserine					In isoform 2.		Cdc2 kinase substrate motif;CDK kinase substrate motif;CDK1,2,4,6 kinase substrate motif;ERK1,2 kinase substrate motif;GSK-3, ERK1, ERK2, CDK5 substrate motif;WW domain binding motif	1	1.84409e-07	162.68	131.25	142.91	-0.23237	UID625	Chk1
460	F5H658;Q14562	460;460	F5H658	F5H658	ATP-dependent RNA helicase DHX8	DHX8	EPPFLRGHTKQSMDMSPIKIVKNPDGSLSQA		0.040226	0.211443	-0.733064	-2.35601	-2.84137	-3.03899	-3.66329	-3.44475	-3.07943	-4.69588	-2.27055	-2.38947	-2.81231	-3.21914	-2.70521	-2.96865	S	2	___1		ATP-dependent RNA helicase DHX8					Phosphoserine							Cdc2 kinase substrate motif;CDK kinase substrate motif;CDK1,2,4,6 kinase substrate motif;ERK1,2 kinase substrate motif;GSK-3, ERK1, ERK2, CDK5 substrate motif;MAPKAPK2 kinase substrate motif;WW domain binding motif	0.999996	0.000374536	103.91	63.578	70.942	-1.2196	UID627
203	H0YKH0;H0YLW9;H0YLI3;F5H7D6;H0YNT2;H0YKT5;H0YKN8;H0YL70;Q04726	203;203;277;147;147;208;209;213;203	H0YKH0	H0YKH0	Transducin-like enhancer protein 3	TLE3	ELDHRERESSANNSVSPSESLRASEKHRGSA		0.73975	0.892578	-0.0744205	-0.34395	-0.144745	-0.0993996	NaN	0.258833	NaN	0.364712	0.74807	0.267584	0.00386429	0.161726	0.237215	-0.402836	S	2	___1		Transducin-like enhancer protein 3					Phosphoserine		CcN domain					Casein kinase II substrate motif;ERK1,2 kinase substrate motif;G protein-coupled receptor kinase 1 substrate motif;GSK3 kinase substrate motif;GSK-3, ERK1, ERK2, CDK5 substrate motif;WW domain binding motif	0.997119	2.0436e-41	291.46	259.3	203.04	0.012251	UID629
210	F5H8D7;P18887;M0QYS5	210;241;248	F5H8D7	F5H8D7	DNA repair protein XRCC1	XRCC1	SPVSRAIGSTSKPQESPKGKRKLDLNQEEKK		0.0113767	0.118234	-0.786961	-3.09346	-0.113434	-0.442146	-0.123051	0.387293	-0.147827	-0.538918	1.19406	1.30452	0.161095	0.471365	0.61264	0	S	2	___1		DNA repair protein XRCC1					Phosphoserine							b-Adrenergic Receptor kinase substrate motif;ERK1,2 kinase substrate motif;Growth associated histone HI kinase substrate motif;GSK-3, ERK1, ERK2, CDK5 substrate motif;PKA kinase substrate motif;PKC kinase substrate motif;WW domain binding motif	1	2.73824e-27	281.99	237.42	281.99	2.7996	UID630
85	H0YAQ0;F5H8F7;Q9UBL3	85;484;623	H0YAQ0	H0YAQ0	Set1/Ash2 histone methyltransferase complex subunit ASH2	ASH2L	ADVLYHVETEVDGRRSPPWEP__________		0.0038938	0.0594462	-0.964498	-3.8521	-0.219616	-0.481722	-1.27338	-1.10123	-1.17702	-1.24224	0.656734	-0.0260334	-0.227491	0.0681686	-0.228231	NaN	S	2	___1		Set1/Ash2 histone methyltransferase complex subunit ASH2												ERK1,2 kinase substrate motif;Growth associated histone HI kinase substrate motif;GSK-3, ERK1, ERK2, CDK5 substrate motif;PKA kinase substrate motif;PKC kinase substrate motif;WW domain binding motif	1	0.00296621	114.39	83.597	104.42	-0.29694	UID631
327	F6Q6H0;I6L8A6;Q99708	327;327;327	F6Q6H0	F6Q6H0	DNA endonuclease RBBP8	RBBP8	TSKTPPQEELPTRVSSPVFGATSSIKSGLDL		0.742841	0.890936	0.0775993	0.338374	-0.906534	-1.06936	-1.39505	-1.06652	-0.499903	-0.931177	-0.58284	-0.867443	-1.70237	-1.36916	-0.756638	NaN	S	2	___1		DNA endonuclease RBBP8					Phosphoserine	Abolishes BRCA1 interaction and ubiquitination. No activation of CHEK1 after DNA damage						14-3-3 domain binding motif;Calmodulin-dependent protein kinase II substrate motif;ERK1,2 kinase substrate motif;GSK-3, ERK1, ERK2, CDK5 substrate motif;MDC1 BRCT domain binding motif;PKA kinase substrate motif;PKC kinase substrate motif;Plk1 PBD domain binding motif;WW domain binding motif	0.970303	0.000382593	102.5	78.214	102.5	0.047003	UID634
1796	F8VPD4;P27708	1796;1859	F8VPD4	F8VPD4	CAD protein;Glutamine-dependent carbamoyl-phosphate synthase;Aspartate carbamoyltransferase;Dihydroorotase	CAD	LPDGRFHLPPRIHRASDPGLPAEEPKEKSSR		0.230653	0.525306	0.359772	1.27642	-0.102095	-0.197775	-0.0971699	0.618898	0.921343	0.998604	-0.0418568	-0.471952	0.775942	-0.0239773	-0.117531	-0.137451	S	2	___1		CAD protein					Phosphoserine| by RPS6KB1 and PKA		Linker					AMP-activated protein kinase substrate motif;HMGCoA Reductase kinase substrate motif;PKA kinase substrate motif;PKC kinase substrate motif	1	4.47571e-07	138.02	119.04	107.65	1.0396	UID635	PKACA;p70S6K
329	F8VQE1;Q9UHB6;F8VS07	329;490;187	F8VQE1	F8VQE1	LIM domain and actin-binding protein 1	LIMA1	LERPAQLANARETPHSPGVEDAPIAKVGVLA		0.157433	0.422381	0.287205	1.52829	1.19203	1.07361	0.808849	1.0428	1.08472	1.65573	1.54605	0.83448	0.900431	0.571692	0.719471	0.562389	S	2	___1		LIM domain and actin-binding protein 1					Phosphoserine							ERK1,2 kinase substrate motif;GSK-3, ERK1, ERK2, CDK5 substrate motif;WW domain binding motif	1	2.70051e-64	348.73	295.94	291.13	1.0608	UID636
693	H0YH87;F8WB06;F8VQP2;V9GY86;Q99700;F8W0B5	693;507;507;612;772;150	H0YH87	H0YH87	Ataxin-2	ATXN2	NSPAGNKENIKPNETSPSFSKAENKGISPVV		0.0283728	0.17002	0.469202	2.6078	0.576851	0.438467	1.08613	0.501925	1.00078	0.980803	0.770956	0.175262	0.0290394	NaN	0.426359	0.0731716	S	2	___1		Ataxin-2										In isoform 3.		Casein kinase II substrate motif;ERK1,2 kinase substrate motif;G protein-coupled receptor kinase 1 substrate motif;GSK3 kinase substrate motif;GSK-3, ERK1, ERK2, CDK5 substrate motif;WW domain binding motif	0.974821	7.56321e-36	301.48	255.48	224.59	0.13142	UID637
32	F8VW64;F8VWX1;F8W659;J3KQU3;P51513	32;117;154;113;157	F8VW64	F8VW64	RNA-binding protein Nova-1	NOVA1	QTTVNPDRIKQTLPSSPTTTKSSPSDPMTTS		0.296119	0.60427	-0.247954	-1.11774	-1.32799	-0.937435	-1.67304	-1.23909	-0.878069	-0.705439	-0.525448	-0.758764	-1.29821	NaN	-0.933132	NaN	S	2	___1		RNA-binding protein Nova-1					Phosphoserine					In isoform 3| isoform 5.		Casein kinase II substrate motif;ERK1,2 kinase substrate motif;G protein-coupled receptor kinase 1 substrate motif;GSK-3, ERK1, ERK2, CDK5 substrate motif;MDC1 BRCT domain binding motif;Plk1 PBD domain binding motif;WW domain binding motif	0.8789	1.30864e-07	152.4	76.256	152.4	0.3045	UID642
49	F8VX12;F8VX04;Q9H2H9	49;49;49	F8VX12	F8VX12	Sodium-coupled neutral amino acid transporter 1	SLC38A1	VENGQINSKFISDRESRRSLTNSHLEKKKCD		0.960709	0.988712	0.00752163	0.0505115	2.27003	2.28596	1.79521	2.60798	2.29087	2.02294	1.88646	2.40511	2.15236	2.55117	2.16161	2.07116	S	2	___1		Sodium-coupled neutral amino acid transporter 1											Cytoplasmic	AMP-activated protein kinase substrate motif;b-Adrenergic Receptor kinase substrate motif;Casein kinase I substrate motif;Casein kinase II substrate motif;MAPKAPK2 kinase substrate motif;PKA kinase substrate motif;PKC kinase substrate motif	1	0.00312883	176.48	96.318	176.48	1.0584	UID644
52	F8VX12;F8VX04;Q9H2H9	52;52;52	F8VX12	F8VX12	Sodium-coupled neutral amino acid transporter 1	SLC38A1	GQINSKFISDRESRRSLTNSHLEKKKCDEYI		0.479073	0.763257	0.246659	0.735255	0.303326	-0.419821	-1.15054	-0.452255	0.235287	-0.796509	-0.845116	-0.163404	-0.72851	-0.701401	0.198082	-1.52012	S	2	___1		Sodium-coupled neutral amino acid transporter 1					Phosphoserine						Cytoplasmic	Casein kinase II substrate motif;G protein-coupled receptor kinase 1 substrate motif;GSK3 kinase substrate motif;PKA kinase substrate motif;PKC kinase substrate motif	0.999861	4.41366e-30	248.98	150.4	156.52	-0.32055	UID645
347	F8VXC8;Q8TAQ2	347;347	F8VXC8	F8VXC8	SWI/SNF complex subunit SMARCC2	SMARCC2	REEEQEDLTKDMDEPSPVPNVEEVTLPKTVN		0.0629957	0.259662	-0.305761	-2.12041	-0.0605202	-0.0656433	-5.14984e-05	0.0794621	0.0765324	0.385008	0.50724	0.268457	0.359585	-0.0436592	0.782837	NaN	S	2	___1	SWIRM-assoc_2	SWI/SNF complex subunit SMARCC2					Phosphoserine							Casein kinase I substrate motif;DNA dependent Protein kinase substrate motif;ERK1,2 kinase substrate motif;GSK-3, ERK1, ERK2, CDK5 substrate motif;WW domain binding motif	1	1.96407e-08	132.51	118.83	132.51	-2.5053	UID647
283	F8VXC8;Q8TAQ2	283;283	F8VXC8	F8VXC8	SWI/SNF complex subunit SMARCC2	SMARCC2	RRKKISAKTLTDEVNSPDSDRRDKKGGNYKK		0.800362	0.920252	-0.0467024	-0.259702	-0.566048	-0.178436	-0.510048	-0.600843	-0.183132	0.333225	0.27182	-0.271723	-0.418173	-0.429783	-0.261862	-0.315348	S	2	___1	SWIRM-assoc_2	SWI/SNF complex subunit SMARCC2					Phosphoserine							Casein kinase I substrate motif;Casein kinase II substrate motif;ERK1,2 kinase substrate motif;GSK-3, ERK1, ERK2, CDK5 substrate motif;WW domain binding motif	0.999997	3.94712e-12	176.89	145.47	176.89	0.55118	UID651
371	F8VZ44;Q9NRG9	371;495	F8VZ44	F8VZ44	Aladin	AAAS	AHIPLYFVNAQFPRFSPVLGRAQEPPAGGGG		0.19152	0.471048	0.36439	1.40084	0.849586	0.975574	0.186668	1.06695	0.643478	1.39803	1.1575	0.764931	0.342989	0.467134	0.511642	-0.310249	S	2	___1		Aladin					Phosphoserine							ERK1,2 kinase substrate motif;GSK-3, ERK1, ERK2, CDK5 substrate motif;PKA kinase substrate motif;PKC kinase substrate motif;WW domain binding motif	1	0.00101223	116.25	78.836	53.968	-0.11991	UID652
154	H3BRU6;F8VZX2;Q15366	154;173;173	H3BRU6	H3BRU6	Poly(rC)-binding protein 2	PCBP2	CVKQICVVMLETLSQSPPKGVTIPYRPKPSS		0.167342	0.435402	0.410649	1.51861	-0.487476	NaN	0.0700073	0.47237	0.383629	0.756563	-0.641123	-0.428423	-0.134935	0.0364494	0.309879	NaN	S	3	___1		Poly(rC)-binding protein 2					Phosphoserine							Cdc2 kinase substrate motif;CDK kinase substrate motif;CDK1,2,4,6 kinase substrate motif;ERK1,2 kinase substrate motif;GSK-3, ERK1, ERK2, CDK5 substrate motif;WW domain binding motif	0.999856	3.58701e-27	255.23	231.4	182.47	-0.83707	UID654
269	F8W126;Q96EZ8	269;282	F8W126	F8W126	Microspherule protein 1	MCRS1	QTVQPLPKGDQVLNFSDAEDLIDDSKLKDMR		0.651433	0.847759	0.130091	0.471783	-1.31312	NaN	-0.386835	-1.18627	-0.477198	-0.624533	NaN	NaN	-0.972122	-1.3503	-0.398403	-0.989895	S	2	___1	MCRS_N	Microspherule protein 1					Phosphoserine							Casein kinase II substrate motif	1	2.67382e-13	164.68	142.35	164.68	-0.07175	UID656
6	F8W6I7;P09651;F8VTQ5;F8W646	6;6;6;6	F8W6I7	F8W6I7	Heterogeneous nuclear ribonucleoprotein A1;Heterogeneous nuclear ribonucleoprotein A1, N-terminally processed	HNRNPA1	__________MSKSESPKEPEQLRKLFIGGL		0.0310639	0.178493	0.383978	2.50715	4.42546	4.74658	3.96592	4.21011	4.45158	4.76324	3.91533	4.41312	4.02767	3.8797	4.16338	3.8598	S	3	___1		Heterogeneous nuclear ribonucleoprotein A1;Heterogeneous nuclear ribonucleoprotein A1| N-terminally processed					Phosphoserine		Globular A domain					b-Adrenergic Receptor kinase substrate motif;Calmodulin-dependent protein kinase II substrate motif;Casein kinase II substrate motif;Chk1 kinase substrate motif;ERK1,2 kinase substrate motif;G protein-coupled receptor kinase 1 substrate motif;Growth associated histone HI kinase substrate motif;GSK-3, ERK1, ERK2, CDK5 substrate motif;MAPKAPK2 kinase substrate motif;PKA kinase substrate motif;PKC k…	1	6.76525e-15	241.42	206.73	226.88	-0.60092	UID657
427	F8W726;Q14157	427;416	F8W726	F8W726	Ubiquitin-associated protein 2-like	UBAP2L	LVQYDLKNPSDSAVHSPFTKRQAFTPSSTMM		0.150427	0.412092	0.353385	1.59032	-0.667561	-0.832378	-0.805996	-0.483265	0.130119	-0.00759315	-0.533579	-0.89192	-0.909588	NaN	-0.856236	NaN	S	2	___1		Ubiquitin-associated protein 2-like					Phosphoserine							Casein kinase II substrate motif;ERK1,2 kinase substrate motif;GSK-3, ERK1, ERK2, CDK5 substrate motif;MAPKAPK2 kinase substrate motif;WW domain binding motif	0.988618	3.23542e-20	250.52	229.22	250.52	0.4652	UID658
620	F8W726;Q14157	620;609	F8W726	F8W726	Ubiquitin-associated protein 2-like	UBAP2L	QRSTQTRRYPSSISSSPQKDLTQAKNGFSSV		0.86796	0.950729	-0.0238775	-0.170575	2.81149	2.94285	3.32659	3.38756	3.22064	3.40282	3.36033	3.34537	3.05442	3.35953	3.32818	2.78738	S	2	___1		Ubiquitin-associated protein 2-like					Phosphoserine							Cdc2 kinase substrate motif;CDK kinase substrate motif;CDK1,2,4,6 kinase substrate motif;ERK1,2 kinase substrate motif;Growth associated histone HI kinase substrate motif;GSK-3, ERK1, ERK2, CDK5 substrate motif;MAPKAPK2 kinase substrate motif;MDC1 BRCT domain binding motif;Plk1 PBD domain binding motif;WW domain binding motif	0.999999	5.31661e-29	282.81	230.85	249.82	-0.77525	UID659
450	F8W9W2;P43250;P34947	450;484;484	F8W9W2	F8W9W2	G protein-coupled receptor kinase 6;G protein-coupled receptor kinase 5	GRK6;GRK5	PQAIYCKDVLDIEQFSTVKGVELEPTDQDFY		0.0542067	0.236839	0.30747	2.25425	NaN	-0.11241	-0.290489	-0.0273876	0.00622559	0.196251	-0.235817	0.00549507	-0.613127	-0.541321	-0.380388	NaN	S	2	___1		G protein-coupled receptor kinase 5;G protein-coupled receptor kinase 6				AGC-kinase C-terminal	Phosphoserine;Phosphoserine| by autocatalysis	15-20 fold defects in kinase activity| when associated with A-485						Casein kinase I substrate motif	0.865489	6.35597e-16	245.5	177.57	210.41	0.2771	UID663	GRK6
501	F8WAE5;Q9BY44	501;506	F8WAE5	F8WAE5	Eukaryotic translation initiation factor 2A;Eukaryotic translation initiation factor 2A, N-terminally processed	EIF2A	HEAKKAAKQEARSDKSPDLAPTPAPQSTPRN		0.034732	0.196391	0.558196	2.44197	0.365873	0.225311	0.485155	0.249817	0.97097	1.09573	0.614786	0.335402	-0.267302	-0.348524	0.11445	-0.40513	S	2	___1		Eukaryotic translation initiation factor 2A;Eukaryotic translation initiation factor 2A| N-terminally processed					Phosphoserine							ERK1,2 kinase substrate motif;G protein-coupled receptor kinase 1 substrate motif;Growth associated histone HI kinase substrate motif;GSK-3, ERK1, ERK2, CDK5 substrate motif;WW domain binding motif	0.99999	1.45347e-33	247.89	229.48	247.89	1.2189	UID666
750	F8WBA3;Q15139;O94806;H0Y5M6	750;742;735;128	F8WBA3	F8WBA3	Serine/threonine-protein kinase;Serine/threonine-protein kinase D1;Serine/threonine-protein kinase D3	PRKD1;PRKD3	DFGFARIIGEKSFRRSVVGTPAYLAPEVLRN		0.847793	0.947132	0.0432787	0.196975	1.08651	0.938337	0.314472	0.957087	0.71862	1.17709	1.3578	1.19318	0.806513	0.723104	0.753656	0.098196	S	2	___1	Pkinase	Serine/threonine-protein kinase D1;Serine/threonine-protein kinase D3				Protein kinase	Phosphoserine| by autocatalysis;Phosphoserine| by autocatalysis and PKC/PRKCD					In isoform 2.		G protein-coupled receptor kinase 1 substrate motif;MAPKAPK2 kinase substrate motif;NIMA kinase substrate motif;PKA kinase substrate motif;PKC kinase substrate motif	1	7.94148e-22	230.36	185.9	225.32	0.074708	UID669	PKCD;PRKD3;PRKD1;PKCH;PKCE;PKCA
405	F8WBA3;Q15139;O94806	405;397;391	F8WBA3	F8WBA3	Serine/threonine-protein kinase;Serine/threonine-protein kinase D1;Serine/threonine-protein kinase D3	PRKD1;PRKD3	MQDPDPDHEDANRTISPSTSNNIPLMRVVQS		0.564834	0.813373	0.0742514	0.597607	0.140202	0.30549	-0.243107	-0.0238419	0.252935	0.387644	0.00993347	0.0720444	-0.182264	0.20891	0.202888	NaN	S	2	___1		Serine/threonine-protein kinase D1;Serine/threonine-protein kinase D3					Phosphoserine;Phosphoserine| by MAPK13							14-3-3 domain binding motif;Calmodulin-dependent protein kinase II substrate motif;Casein kinase II substrate motif;ERK1,2 kinase substrate motif;G protein-coupled receptor kinase 1 substrate motif;GSK3 kinase substrate motif;GSK-3, ERK1, ERK2, CDK5 substrate motif;PKA kinase substrate motif;PKC kinase substrate motif;WW domain binding motif	0.999907	3.38751e-16	218.34	172.27	186.13	-0.7244	UID670
82	F8WBJ7;Q9H330	82;332	F8WBJ7	F8WBJ7	Transmembrane protein 245	TMEM245	LSTSPSPSSPSPTSPSPTLGRRRPEIGTFLR		0.587835	0.830653	0.106203	0.562002	1.07248	1.41642	0.335501	0.765915	1.03834	0.866125	0.84037	1.11332	0.852173	0.792166	0.449945	NaN	S	3	___1		Transmembrane protein 245					Phosphoserine					In isoform 3.		Casein kinase II substrate motif;DNA dependent Protein kinase substrate motif;ERK1,2 kinase substrate motif;GSK-3, ERK1, ERK2, CDK5 substrate motif;WW domain binding motif	0.801878	4.16597e-11	141.45	128.32	128.49	1.2337	UID671
30	K7ENK9;K7EKX0;J3QRU4;F8WCA0;L7N2F9;Q15836;P63027	30;30;75;77;75;58;75	K7ENK9	K7ENK9	Vesicle-associated membrane protein 3;Vesicle-associated membrane protein 2	VAMP2;VAMP3	LSELDDRADALQAGASQFETSAAKLKRKYWW		0.724472	0.885092	0.066958	0.363709	-1.83454	-1.52468	-2.49893	-1.84406	-1.58206	-1.89047	-1.51464	-1.99467	-2.14439	-1.97935	-2.01403	NaN	S	2	___1	Synaptobrevin	Vesicle-associated membrane protein 2;Vesicle-associated membrane protein 3				v-SNARE coiled-coil homology							Cytoplasmic	ATM kinase substrate motif;Casein kinase II substrate motif;DNA dependent Protein kinase substrate motif;G protein-coupled receptor kinase 1 substrate motif	0.917897	0.000732069	94.882	62.873	94.882	-0.16323	UID673
35	K7ENK9;K7EKX0;J3QRU4;F8WCA0;L7N2F9;Q15836;P63027	35;35;80;82;80;63;80	K7ENK9	K7ENK9	Vesicle-associated membrane protein 3;Vesicle-associated membrane protein 2	VAMP2;VAMP3	DRADALQAGASQFETSAAKLKRKYWWKNLKM		0.155062	0.421491	0.265903	1.56997	0.587847	0.320354	0.162006	0.76631	0.724268	0.510963	0.466232	0.410032	-0.197916	NaN	0.305872	NaN	S	2	___1	Synaptobrevin	Vesicle-associated membrane protein 2;Vesicle-associated membrane protein 3				v-SNARE coiled-coil homology							Cytoplasmic		0.904688	1.7951e-41	272.8	236.99	272.8	1.2219	UID674
16	K7ENK9;K7EKX0;J3QRU4;F8WCA0;L7N2F9;Q15836;P63027;F5GZV7;P23763	16;16;61;63;61;44;61;63;63	K7ENK9	K7ENK9	Vesicle-associated membrane protein 3;Vesicle-associated membrane protein 2;Vesicle-associated membrane protein 1	VAMP2;VAMP3;VAMP1	MRVNVDKVLERDQKLSELDDRADALQAGASQ		0.634849	0.837589	0.201553	0.493607	0.220785	0.477409	-1.0633	-0.514608	-0.573565	-0.288876	-0.171345	0.373869	-0.90271	NaN	NaN	-1.26746	S	2	___1	Synaptobrevin	Vesicle-associated membrane protein 1;Vesicle-associated membrane protein 2;Vesicle-associated membrane protein 3				v-SNARE coiled-coil homology							Cytoplasmic	Casein kinase II substrate motif;G protein-coupled receptor kinase 1 substrate motif;PKA kinase substrate motif;PKC kinase substrate motif;Pyruvate dehydrogenase kinase substrate motif	1	2.1554e-05	184.21	156	132.79	1.6833	UID675
99	F8WDB4;Q9UFC0	99;251	F8WDB4	F8WDB4	Leucine-rich repeat and WD repeat-containing protein 1	LRWD1	DDVPLSLSPSKRACASPSAQVEGSPVAGSDG		0.0406671	0.210306	-0.487982	-2.38835	0.959383	1.34495	0.182196	0.443771	0.421314	0.839581	1.4269	1.14665	0.990372	1.10474	1.2639	NaN	S	3	___1		Leucine-rich repeat and WD repeat-containing protein 1					Phosphoserine							Casein kinase II substrate motif;ERK1,2 kinase substrate motif;GSK-3, ERK1, ERK2, CDK5 substrate motif;WW domain binding motif	0.984436	1.28343e-28	212.39	173.05	96.123	0.3225	UID678
60	F8WDB4;Q9UFC0	60;212	F8WDB4	F8WDB4	Leucine-rich repeat and WD repeat-containing protein 1	LRWD1	EELVAASRTQVQKANSPEKPPEAGAAHKPRA		0.281853	0.589285	-0.28346	-1.13749	1.23125	1.84653	1.38333	0.752668	1.76786	0.851614	1.5619	1.98676	0.96439	1.49424	1.43593	2.09079	S	3	___1		Leucine-rich repeat and WD repeat-containing protein 1					Phosphoserine							Calmodulin-dependent protein kinase II substrate motif;Casein kinase II substrate motif;Cdc2 kinase substrate motif;CDK kinase substrate motif;CDK1,2,4,6 kinase substrate motif;Chk1 kinase substrate motif;ERK1,2 kinase substrate motif;G protein-coupled receptor kinase 1 substrate motif;GSK-3, ERK1, ERK2, CDK5 substrate motif;PKA kinase substrate motif;PKC kinase substrate motif;WW domain binding …	1	2.61068e-19	179.17	166.23	114.84	0.33759	UID679
91	F8WDB4;Q9UFC0	91;243	F8WDB4	F8WDB4	Leucine-rich repeat and WD repeat-containing protein 1	LRWD1	RLAALKRPDDVPLSLSPSKRACASPSAQVEG		0.185627	0.463945	-0.41214	-1.43314	1.75257	2.0278	1.21855	1.24379	1.26054	1.43866	2.53023	2.34135	NaN	1.31043	2.13007	1.20021	S	2	___1		Leucine-rich repeat and WD repeat-containing protein 1					Phosphoserine							Casein kinase II substrate motif;Cdc2 kinase substrate motif;CDK kinase substrate motif;CDK1,2,4,6 kinase substrate motif;ERK1,2 kinase substrate motif;GSK-3, ERK1, ERK2, CDK5 substrate motif;WW domain binding motif	0.999867	1.77179e-26	273.39	234.38	273.39	-0.54148	UID680
82	F8WE04;P04792	82;82	F8WE04	F8WE04	Heat shock protein beta-1	HSPB1	AVAAPAYSRALSRQLSSGVSEIRHTADRWRV		0.387676	0.693274	0.288579	0.903167	1.75508	2.06866	0.780851	1.31386	1.6945	1.67189	1.8403	1.97108	1.35602	1.10097	1.10573	0.179272	S	2	___1		Heat shock protein beta-1					Phosphoserine| by MAPKAPK2| MAPKAPK3 and MAPKAPK5	Mimicks phosphorylation state| leading to dreased ability to act as molecular chaperones| when associated with D-15 and D-78	Interaction with TGFB1I1					14-3-3 domain binding motif;Calmodulin-dependent protein kinase II substrate motif;Calmodulin-dependent protein kinase IV substrate motif;Chk1 kinase substrate motif;G protein-coupled receptor kinase 1 substrate motif;GSK3 kinase substrate motif;MAPKAPK2 kinase substrate motif;PKA kinase substrate motif;PKC kinase substrate motif	0.999995	8.17678e-06	179.94	145.85	179.94	-0.26222	UID681	MAPKAPK2;PKACA;P70S6KB;PKG1 iso2;PRKD1;Akt1
13	F8WF93;H7BZZ2;F8WE30;H7C0X4;Q92685	13;11;13;12;13	F8WF93	F8WF93	Dol-P-Man:Man(5)GlcNAc(2)-PP-Dol alpha-1,3-mannosyltransferase	ALG3	___MAAGLRKRGRSGSAAQAEGLCKQWLQRA		0.768205	0.9076	-0.0578213	-0.302857	0.94685	1.13016	1.18346	1.64259	1.53673	1.71337	1.35363	1.2017	1.841	1.73154	1.47523	0.896996	S	2	___1		Dol-P-Man:Man(5)GlcNAc(2)-PP-Dol alpha-1|3-mannosyltransferase										In isoform 2.		14-3-3 domain binding motif;Akt kinase substrate motif;Calmodulin-dependent protein kinase II substrate motif;G protein-coupled receptor kinase 1 substrate motif;MAPKAPK1 kinase substrate motif;PKA kinase substrate motif;PKC kinase substrate motif	0.999969	6.68053e-10	212.55	176.26	194.86	-0.51376	UID682
72	F8WF45;P82094	72;72	F8WF45	F8WF45	TATA element modulatory factor	TMF1	WDTSTWGLKSNTEPQSPPIASPKAITKPVRR		0.0539598	0.236368	0.845853	2.25717	-1.14696	-0.984974	-2.13659	-1.9385	NaN	-1.53105	-1.68627	-1.64041	-2.87542	-2.71905	-3.04619	NaN	S	2	___1		TATA element modulatory factor					Phosphoserine							Casein kinase I substrate motif;ERK1,2 kinase substrate motif;G protein-coupled receptor kinase 1 substrate motif;GSK-3, ERK1, ERK2, CDK5 substrate motif;WW domain binding motif	0.925859	0.0332841	59.607	40.284	53.3	1.4329	UID683
344	F8WF45;P82094	344;344	F8WF45	F8WF45	TATA element modulatory factor	TMF1	FSVQSLDSRSVSEINSDDELSGKGYALVPII		0.00782114	0.0941538	0.710558	3.31439	2.44422	2.76192	2.10335	2.50184	2.2876	2.46795	1.28362	1.93675	1.99879	2.31885	1.72463	1.0409	S	2	___1		TATA element modulatory factor					Phosphoserine							BARD1 BRCT domain binding motif;Casein kinase I substrate motif;Casein kinase II substrate motif;MAPKAPK2 kinase substrate motif	0.999999	2.65744e-27	266.71	203.78	245.19	-1.2794	UID684
1764	G3V2D8;Q68DK2	1764;1764	G3V2D8	G3V2D8	Zinc finger FYVE domain-containing protein 26	ZFYVE26	IVHQAADPETLPRSPSAEFSPAAPPGISSIH		0.773437	0.908926	0.0692707	0.297808	-2.3123	NaN	-1.51992	-2.04808	-1.34971	-1.75573	-1.67089	-2.09122	-1.79228	-2.32456	-1.45314	NaN	S	3	___1		Zinc finger FYVE domain-containing protein 26										In isoform 3.;In isoform 4.		14-3-3 domain binding motif;Calmodulin-dependent protein kinase II substrate motif;Calmodulin-dependent protein kinase IV substrate motif;Casein kinase II substrate motif;Chk1 kinase substrate motif;DNA dependent Protein kinase substrate motif;G protein-coupled receptor kinase 1 substrate motif;GSK3 kinase substrate motif;PKA kinase substrate motif;PKC kinase substrate motif	0.887772	0.00023542	63.291	55.626	63.291	2.054	UID689
110	G3V3G7;G3V340;Q13033	110;229;229	G3V3G7	G3V3G7	Striatin-3	STRN3	SVETKNLEQILNGGESPK_____________		0.215905	0.505049	-0.163161	-1.33105	-1.45413	-1.31734	-0.966202	-0.845007	-1.00367	-1.11802	-0.922926	-0.867331	-1.07768	-0.749521	-1.1537	NaN	S	2	___1		Striatin-3					Phosphoserine							b-Adrenergic Receptor kinase substrate motif;ERK1,2 kinase substrate motif;Growth associated histone HI kinase substrate motif;GSK-3, ERK1, ERK2, CDK5 substrate motif;PKA kinase substrate motif;PKC kinase substrate motif;WW domain binding motif	1	5.68872e-08	146.96	118.56	146.96	0.019423	UID690
58	G3V3H1;Q86TV6	58;160	G3V3H1	G3V3H1	Tetratricopeptide repeat protein 7B	TTC7B	YATKGLCLEKLPISSSTSNLHVDREQDVITC		0.222994	0.510852	-0.371702	-1.32113	0.501999	0.315439	-0.582167	0.650692	0.58655	0.8501	NaN	0.551708	0.638891	1.17496	0.669651	NaN	S	2	___1		Tetratricopeptide repeat protein 7B												Casein kinase II substrate motif;MDC1 BRCT domain binding motif;Plk1 PBD domain binding motif	0.998605	5.55792e-57	344.18	300.84	240.2	1.3746	UID695
128	G3V3T3	128	G3V3T3	G3V3T3		ACIN1	LKEAVVDLHADDSRISEDETERNGDDGTHDK		0.134192	0.391305	0.392046	1.62983	-0.480169	-0.88105	0.178661	0.176888	-0.165442	-0.451263	-0.92388	-0.803417	-0.422632	-1.07142	0.068964	-0.822262	S	2	___1														BARD1 BRCT domain binding motif;Casein kinase II substrate motif;G protein-coupled receptor kinase 1 substrate motif;PKA kinase substrate motif;PKC kinase substrate motif	1	1.96929e-51	271.51	239.74	138.08	-0.14342	UID697
39	G3V529;Q9GZR7	39;82	G3V529	G3V529	ATP-dependent RNA helicase DDX24	DDX24	SLFSKEAPKRKAQAVSEEEEEEEGKSSSPKK		0.00547739	0.0790556	0.757587	3.63096	0.16103	-0.0673771	0.793526	NaN	0.493288	1.06587	-0.381313	-0.417473	-0.182775	-0.490404	0.0964851	-0.23443	S	2	___1		ATP-dependent RNA helicase DDX24					Phosphoserine							BARD1 BRCT domain binding motif;Casein kinase II substrate motif;G protein-coupled receptor kinase 1 substrate motif	1	1.47711e-18	238.83	212.31	204.82	0.02591	UID700	Chk1
1071	G3V599;O15320;Q96PC5	1071;536;1144	G3V599	G3V599	cTAGE family member 5;Melanoma inhibitory activity protein 2	CTAGE5;MIA2	PSPLGWPSSETRAFLSPPTLLEGPLRLSPLL		0.166049	0.434221	-0.420026	-1.49398	-2.32078	-1.76523	-2.6486	-2.84859	-1.74611	-1.86595	-1.61002	-1.78814	-2.51042	-1.83573	-0.9834	-1.9474	S	2	___1		cTAGE family member 5		Pro-rich			Phosphoserine					In isoform 8.;In isoform MEA11.		14-3-3 domain binding motif;Casein kinase II substrate motif;ERK1,2 kinase substrate motif;GSK-3, ERK1, ERK2, CDK5 substrate motif;WW domain binding motif	0.999889	0.00111144	83.31	73.622	78.763	0.042178	UID702
1170	G3V599;O15320;Q96PC5;Q96RT6	1170;635;1243;604	G3V599	G3V599	cTAGE family member 5;Melanoma inhibitory activity protein 2;cTAGE family member 2	CTAGE5;MIA2;CTAGE1	PPQRQDRFCSNSGRLSGPAELRSFNMPSLDK		0.587328	0.83107	0.104063	0.565363	-1.52649	NaN	-1.74147	-0.953823	-1.18956	-1.05285	-1.67837	-1.258	-1.6127	-1.33863	-1.09682	NaN	S	2	___1		cTAGE family member 2;cTAGE family member 5		Pro-rich										MAPKAPK2 kinase substrate motif;PKA kinase substrate motif;PKC kinase substrate motif	1	0.0116405	67.334	33.081	57.347	0.74851	UID703
672	G3V599;O15320;Q96PC5;G3V5K6;Q8IX94;Q86UF2;P0CG41;A4FU28;A4D2H0	672;137;745;99;138;138;138;138;138	G3V599	G3V599	cTAGE family member 5;Melanoma inhibitory activity protein 2;cTAGE family member 4;cTAGE family member 6;cTAGE family member 8;cTAGE family member 9;cTAGE family member 15	CTAGE5;MIA2;CTAGE4;CTAGE6;CTAGE8;CTAGE9;CTAGE15	TEAQSLEATCEKLNRSNSELEDEILCLEKEL		0.117973	0.371363	0.321532	1.78186	-1.41302	-1.06068	NaN	-1.68555	-1.0984	-1.15446	-1.59979	NaN	-1.54765	NaN	-1.30063	-1.96774	S	2	___1		cTAGE family member 15;cTAGE family member 4;cTAGE family member 5;cTAGE family member 6;cTAGE family member 8;cTAGE family member 9	+											Casein kinase II substrate motif;PKA kinase substrate motif	0.936981	4.47437e-12	159.13	139.37	44.457	-0.52284	UID704
340	G3V5E1;O75909	340;340	G3V5E1	G3V5E1	Cyclin-K	CCNK	PQPSSPRQVKRAVVVSPKEENKAAEPPPPKI		0.242148	0.547358	-0.324135	-1.25194	-0.384466	-0.241158	-1.32121	-0.592806	-0.664288	-1.37228	NaN	0.0480671	-0.669395	-0.743666	-0.165125	-0.662716	S	2	___1		Cyclin-K					Phosphoserine					In isoform 2.		Casein kinase II substrate motif;ERK1,2 kinase substrate motif;Growth associated histone HI kinase substrate motif;GSK-3, ERK1, ERK2, CDK5 substrate motif;PKA kinase substrate motif;PKC kinase substrate motif;WW domain binding motif	1	0.00396093	93.598	10.847	93.598	0.47125	UID705
136	G3XAC6;Q14498;Q5QP22;Q5QP23;H0Y4X3	136;136;136;135;9	G3XAC6	G3XAC6	RNA-binding protein 39	RBM39	SRRRSRSKSPFRKDKSPVREPIDNLTPEERD		0.327943	0.631156	0.226904	1.02851	5.73799	5.73087	5.10503	4.81429	5.17181	5.2402	5.58644	5.43348	4.96953	4.89991	5.07176	4.47765	S	3	___1		RNA-binding protein 39					Phosphoserine							Calmodulin-dependent protein kinase II substrate motif;Cdc2 kinase substrate motif;CDK kinase substrate motif;CDK1,2,4,6 kinase substrate motif;ERK1,2 kinase substrate motif;Growth associated histone HI kinase substrate motif;GSK-3, ERK1, ERK2, CDK5 substrate motif;PKA kinase substrate motif;PKC kinase substrate motif;WW domain binding motif	1	3.65324e-41	264.49	222.37	237.22	-3.2834	UID706
97	G3XAC6;Q14498;Q5QP22;Q5QP23	97;97;97;97	G3XAC6	G3XAC6	RNA-binding protein 39	RBM39	SRSRSRDRRFRGRYRSPYSGPKFNSAIRGKI		0.553749	0.807805	0.362223	0.612704	2.02202	1.75504	1.5101	1.49665	2.23808	2.16177	2.41585	2.18128	1.93668	1.59579	2.20262	-1.32188	S	2	___1		RNA-binding protein 39					Phosphoserine							14-3-3 domain binding motif;Akt kinase substrate motif;Calmodulin-dependent protein kinase II substrate motif;Casein kinase II substrate motif;ERK1,2 kinase substrate motif;Growth associated histone HI kinase substrate motif;GSK-3, ERK1, ERK2, CDK5 substrate motif;MAPKAPK1 kinase substrate motif;PKA kinase substrate motif;PKC kinase substrate motif;WW domain binding motif	0.99999	0.000178617	176.45	143.39	176.45	-0.86652	UID707
994	G3XAL9;P55011	994;994	G3XAL9	G3XAL9	Solute carrier family 12 member 2	SLC12A2	EEDGKTATQPLLKKESKGPIVPLNVADQKLL		0.0507786	0.232028	0.39017	2.21902	-0.0102005	-0.160093	-0.734026	-0.544775	0.11611	-0.252821	-0.888069	-0.791052	-0.804871	-0.278904	-0.298683	-0.865248	S	2	___1	SLC12	Solute carrier family 12 member 2											Cytoplasmic	AMP-activated protein kinase substrate motif;b-Adrenergic Receptor kinase substrate motif;Calmodulin-dependent protein kinase II substrate motif;Chk1 kinase substrate motif;HMGCoA Reductase kinase substrate motif;PKA kinase substrate motif;PKC kinase substrate motif	1	0.00362051	66.826	49.198	49.448	-0.053383	UID708
655	G3XAM7;P35221;A0A0A0MTJ6;A0A0A0MRI5;P26232	655;655;270;270;654	G3XAM7	G3XAM7	Catenin alpha-1;Catenin alpha-2	CTNNA1;CTNNA2	DSDFETEDFDVRSRTSVQTEDDQLIAGQSAR		0.77494	0.908453	-0.114651	-0.29377	-1.29081	-1.55708	-1.38804	-1.68031	-0.11195	-0.344818	0.164011	-1.60182	-1.4827	-1.39346	-0.485205	-0.885935	S	2	___1	Vinculin	Catenin alpha-1;Catenin alpha-2												Casein kinase II substrate motif;PKA kinase substrate motif;PKC kinase substrate motif	0.853242	6.48081e-13	163.15	148.23	125.28	1.1996	UID710
641	G3XAM7;P35221	641;641	G3XAM7	G3XAM7	Catenin alpha-1	CTNNA1	RKAVLMIRTPEELDDSDFETEDFDVRSRTSV		0.919084	0.974375	0.0241726	0.104839	2.78099	2.74584	3.68731	3.61273	3.19891	3.32439	NaN	NaN	3.29322	3.51271	3.12498	2.87252	S	2	___1	Vinculin	Catenin alpha-1					Phosphoserine							b-Adrenergic Receptor kinase substrate motif;Casein kinase II substrate motif;G protein-coupled receptor kinase 1 substrate motif	1	5.78473e-89	372.64	337.56	372.11	-1.6022	UID711	CK2A1
18	G5E9Q4;O75569	18;18	G5E9Q4	G5E9Q4	Interferon-inducible double-stranded RNA-dependent protein kinase activator A	PRKRA	QSRHRAEAPPLEREDSGTFSLGKMITAKPGK		0.789303	0.917297	0.0296726	0.27448	1.53784	1.15365	1.06265	1.25694	1.28265	1.6187	1.51827	1.31858	1.15981	1.18254	1.40594	1.14926	S	2	___1		Interferon-inducible double-stranded RNA-dependent protein kinase activator A					Phosphoserine	Does not induce apoptosis;No effect on apoptosis induction under conditions of stress	Sufficient for self-association and interaction with TARBP2			In isoform 2.;In isoform 3.		14-3-3 domain binding motif;b-Adrenergic Receptor kinase substrate motif;Calmodulin-dependent protein kinase II substrate motif;Calmodulin-dependent protein kinase IV substrate motif;Casein kinase II substrate motif;Chk1 kinase substrate motif;G protein-coupled receptor kinase 1 substrate motif;GSK3 kinase substrate motif;PKA kinase substrate motif;PKC epsilon kinase substrate motif;PKC kinase su…	1	9.03713e-06	180.81	133.99	167.99	0.19719	UID713
1567	H0Y390;H3BPE1;H3BQK9;Q9UPN3	1567;4516;4553;4521	H0Y390	H0Y390	Microtubule-actin cross-linking factor 1, isoforms 1/2/3/5	MACF1	QAESNKAFLAELEQNSPKIQKVKEALAGLLV		0.377432	0.683656	0.206031	0.92839	-2.34476	-2.1593	-1.61906	-1.88419	-2.20907	-1.52357	NaN	-2.51258	-2.30417	-1.79242	-1.678	-2.52628	S	2	___1	Spectrin	Microtubule-actin cross-linking factor 1| isoforms 1/2/3/5					Phosphoserine							Casein kinase I substrate motif;ERK1,2 kinase substrate motif;Growth associated histone HI kinase substrate motif;GSK-3, ERK1, ERK2, CDK5 substrate motif;PKA kinase substrate motif;PKC kinase substrate motif;WW domain binding motif	1	0.00132228	96.331	65.761	56.563	-1.3566	UID717
364	H0Y449;P67809	364;314	H0Y449	H0Y449	Nuclease-sensitive element-binding protein 1	YBX1	DGKETKAADPPAENSSAPEAEQGGAE_____		0.0137154	0.132984	0.597866	2.98392	0.0243454	-0.0025692	0.0718651	0.375566	0.171719	-0.0827389	-1.15614	-0.241638	-0.371408	-0.57353	0.159277	-0.845572	S	2	___1		Nuclease-sensitive element-binding protein 1					Phosphoserine							Casein kinase I substrate motif;Casein kinase II substrate motif;G protein-coupled receptor kinase 1 substrate motif;MDC1 BRCT domain binding motif;Plk1 PBD domain binding motif	0.851876	4.05312e-19	183.6	134	137.8	0.30543	UID718
215	H0Y449;P67809;C9J5V9	215;165;135	H0Y449	H0Y449	Nuclease-sensitive element-binding protein 1	YBX1	RRRGPPRNYQQNYQNSESGEKNEGSESAPEG		0.713953	0.881411	0.188601	0.381775	NaN	NaN	1.70678	1.08174	1.07479	0.52573	NaN	-0.210093	1.29435	1.69422	1.61676	0.14806	S	2	___1		Nuclease-sensitive element-binding protein 1					Phosphoserine							Casein kinase II substrate motif;G protein-coupled receptor kinase 1 substrate motif	0.996998	2.98162e-45	318.46	300.33	318.46	0.25545	UID721
338	J3QSG6;H0Y465;P21359	338;2188;2543	J3QSG6	J3QSG6	Neurofibromin;Neurofibromin truncated	NF1	QPSQANTKKLLGTRKSFDHLISDTKAPKRQE		0.400799	0.700436	0.164723	0.881845	-0.279781	-0.489838	-0.664335	-0.498032	-0.0130806	-0.224779	-0.404758	-0.388029	-1.08043	-0.69449	-0.0641155	NaN	S	2	___1		Neurofibromin					Phosphoserine					In isoform 3.;In isoform 4.;In isoform 5.		AMP-activated protein kinase substrate motif;PKA kinase substrate motif;PKC kinase substrate motif	1	2.17541e-06	210.35	139	193.28	-0.54319	UID723
77	H0Y641;H0Y4V9;Q92615;A0A087X183	77;167;601;16	H0Y641	H0Y641	La-related protein 4B	LARP4B	VPASCAVSATYERSPSPAHLPDDPKVAEKQR		0.271112	0.577727	0.285208	1.16486	1.34388	1.05878	0.70665	0.590166	1.41153	1.21996	1.52458	0.993301	0.375124	0.613199	0.964518	0.148993	S	2	___1		La-related protein 4B					Phosphoserine							14-3-3 domain binding motif;Calmodulin-dependent protein kinase II substrate motif;Calmodulin-dependent protein kinase IV substrate motif;DNA dependent Protein kinase substrate motif;ERK1,2 kinase substrate motif;GSK-3, ERK1, ERK2, CDK5 substrate motif;PKA kinase substrate motif;PKC kinase substrate motif;WW domain binding motif	0.999939	9.73214e-13	237.27	188.24	237.27	0.6669	UID724
66	H0Y5S9;H0Y682;P49674	66;91;363	H0Y5S9	H0Y5S9	Casein kinase I isoform epsilon	CSNK1E	VASTPASRIQPAGNTSPRAISRVDRERKVSM		0.0187418	0.141899	0.356913	2.93888	NaN	-0.133146	0.150625	0.370565	0.349239	0.0629768	-0.338381	NaN	-0.0166664	-0.409605	-0.0528793	-0.166773	S	2	___1		Casein kinase I isoform epsilon					Phosphoserine							ERK1,2 kinase substrate motif;Growth associated histone HI kinase substrate motif;GSK-3, ERK1, ERK2, CDK5 substrate motif;PKA kinase substrate motif;PKC kinase substrate motif;WW domain binding motif	0.931258	0.00256503	84.169	49.345	73.951	1.0964	UID729
62	H0Y6J6;Q5W012;Q96I25;Q5W011;Q5W010	62;123;155;155;154	H0Y6J6	H0Y6J6	Splicing factor 45	RBM17	DRHEASGFARRPDPDSDEDEDYERERRKRSM		0.102247	0.344037	0.29535	1.81911	2.45966	2.3527	2.39609	2.46314	2.07931	2.41111	NaN	1.71835	2.2969	2.42246	2.26958	1.61764	S	2	___1		Splicing factor 45					Phosphoserine							b-Adrenergic Receptor kinase substrate motif;Casein kinase I substrate motif;Casein kinase II substrate motif;Pyruvate dehydrogenase kinase substrate motif	1	6.45218e-45	307.21	281.76	269.51	-0.32839	UID731
129	H0Y6J6;Q5W012;Q96I25	129;190;222	H0Y6J6	H0Y6J6	Splicing factor 45	RBM17	AAIPPPVYEEQDRPRSPTGPSNSFLANMGGT		0.100026	0.340037	0.221428	1.83295	1.65678	1.81708	1.61286	1.53015	1.42966	1.67158	NaN	1.43597	1.46781	1.62337	1.51386	0.950262	S	3	___1		Splicing factor 45					Phosphoserine							14-3-3 domain binding motif;Calmodulin-dependent protein kinase II substrate motif;Casein kinase II substrate motif;ERK1,2 kinase substrate motif;G protein-coupled receptor kinase 1 substrate motif;Growth associated histone HI kinase substrate motif;GSK-3, ERK1, ERK2, CDK5 substrate motif;PKA kinase substrate motif;PKC kinase substrate motif;WW domain binding motif	0.972501	6.69387e-27	205.73	186.69	205.73	-1.3406	UID732	CLK1;ERK2
106	H0Y6S1;Q9UQR0	106;590	H0Y6S1	H0Y6S1	Sex comb on midleg-like protein 2	SCML2	RSVPGTTSSPLVGDISPKSSPHEVKFQMQRK		0.477826	0.762163	0.32948	0.744579	-0.537819	-0.811142	-0.680704	-0.820414	-0.632515	-0.0966473	0.0439625	-0.432341	-2.4148	-0.900906	NaN	NaN	S	2	___1		Sex comb on midleg-like protein 2					Phosphoserine							Casein kinase II substrate motif;ERK1,2 kinase substrate motif;G protein-coupled receptor kinase 1 substrate motif;Growth associated histone HI kinase substrate motif;GSK3 kinase substrate motif;GSK-3, ERK1, ERK2, CDK5 substrate motif;PKA kinase substrate motif;PKC kinase substrate motif;WW domain binding motif	0.999966	5.63882e-05	98.507	65.773	97.502	1.951	UID735	CDK1;CDK2
75	H0Y7Y8;Q4LE39	75;675	H0Y7Y8	H0Y7Y8	AT-rich interactive domain-containing protein 4B	ARID4B	CKLRRLSKPPFQTNPSPEMVSKLDLTDAKNS		0.706005	0.878905	-0.0697797	-0.389441	-0.439608	-0.0969181	-1.07353	-0.729065	-0.542173	-0.208418	NaN	-0.224478	-0.625181	-0.571068	-0.237545	-0.567587	S	2	___1		AT-rich interactive domain-containing protein 4B					Phosphoserine							Casein kinase II substrate motif;DNA dependent Protein kinase substrate motif;ERK1,2 kinase substrate motif;GSK-3, ERK1, ERK2, CDK5 substrate motif;WW domain binding motif	0.99792	0.000125905	87.088	69.387	72.958	0.38482	UID737
239	H0Y9Z8;Q9BPX3	239;674	H0Y9Z8	H0Y9Z8	Condensin complex subunit 3	NCAPG	TKKIKTLHCEGTEINSDDEQESKEVEETATA		0.22105	0.508769	0.371779	1.30522	1.85844	1.84206	1.46018	1.5874	1.88499	1.80109	0.307766	1.066	1.87103	1.47711	2.25315	1.22842	S	2	___1	Cnd3	Condensin complex subunit 3					Phosphoserine							BARD1 BRCT domain binding motif;Casein kinase I substrate motif;Casein kinase II substrate motif	1	9.63735e-103	388.94	361.44	388.94	0.06132	UID740
98	H0YBC7;O60238	98;120	H0YBC7	H0YBC7	BCL2/adenovirus E1B 19 kDa protein-interacting protein 3-like	BNIP3L	MFDVEMHTSRDHSSQSEEEVVEGEKEVEALK	+	0.00206487	0.0459535	-0.903327	-4.75774	-2.00119	-2.02507	-2.44029	-1.89272	-1.87213	NaN	-1.02746	-0.910173	NaN	NaN	-0.984715	-1.64947	S	2	___1	BNIP3	BCL2/adenovirus E1B 19 kDa protein-interacting protein 3-like					Phosphoserine							BARD1 BRCT domain binding motif;Casein kinase II substrate motif;G protein-coupled receptor kinase 1 substrate motif	0.999574	1.15786e-08	142.91	123.15	142.91	0.48395	UID741
26	H0YBT1;O95429	26;179	H0YBT1	H0YBT1	BAG family molecular chaperone regulator 4	BAG4	SYSTEVPSTYRSSGNSPTPVSRWIYPQQDCQ		0.508565	0.777398	0.575769	0.69652	-1.88803	-2.40611	-1.94774	-2.24307	NaN	NaN	-2.31665	-1.06712	-1.79396	NaN	-3.01593	-5.29136	S	2	___1		BAG family molecular chaperone regulator 4												Casein kinase II substrate motif;ERK1,2 kinase substrate motif;GSK-3, ERK1, ERK2, CDK5 substrate motif;MAPKAPK2 kinase substrate motif;WW domain binding motif	0.988838	0.0204819	54.471	44.057	54.471	0.069192	UID742
77	H0YBZ4;Q15390	77;119	H0YBZ4	H0YBZ4	Mitochondrial fission regulator 1	MTFR1	QDDLLFFEKAPSRQISLPDLSQEEPQLKTPA		0.983615	0.992951	-0.00492287	-0.0211152	0.437922	0.441153	-0.124281	-0.00587845	-0.538862	-0.13887	0.389307	0.477396	-0.334772	-0.0954933	-0.352505	NaN	S	2	___1	Mito_fiss_reg	Mitochondrial fission regulator 1					Phosphoserine							14-3-3 domain binding motif;Calmodulin-dependent protein kinase II substrate motif;Casein kinase II substrate motif;MAPKAPK2 kinase substrate motif;Phosphorylase kinase substrate motif;PKA kinase substrate motif;PKC kinase substrate motif;Pyruvate dehydrogenase kinase substrate motif	1	5.69186e-19	211.75	180.32	211.75	-0.22896	UID743
31	H0YD46;Q15054	31;307	H0YD46	H0YD46	DNA polymerase delta subunit 3	POLD3	KVLQKEKKRGKRVALSDDETKETENMRKKRR		0.525412	0.791939	0.161427	0.660604	-0.534912	NaN	-0.00545502	0.102806	0.803238	0.821842	-0.178682	-0.0141144	0.0232182	0.197556	0.242714	0.185768	S	2	___1	CDC27	DNA polymerase delta subunit 3					Phosphoserine							BARD1 BRCT domain binding motif;Casein kinase II substrate motif;G protein-coupled receptor kinase 1 substrate motif	1	2.50139e-11	160.47	143.11	160.47	-0.21096	UID744
360	H0YE03;H7C3G7;Q2TBE0	360;360;479	H0YE03	H0YE03	CWF19-like protein 2	CWF19L2	PKKEHLRDTKSTFAGSPERESIHILSVDEKN		0.145397	0.409355	-0.182133	-1.61305	-1.14979	-1.08359	NaN	-0.926159	-1.04212	-1.45773	-1.18511	-0.81208	NaN	-0.948059	-0.810053	-0.99341	S	2	___1		CWF19-like protein 2					Phosphoserine							Casein kinase II substrate motif;Cdc2 kinase substrate motif;CDK kinase substrate motif;CDK1,2,4,6 kinase substrate motif;ERK1,2 kinase substrate motif;GSK-3, ERK1, ERK2, CDK5 substrate motif;WW domain binding motif	0.999997	0.0210675	71.03	56.351	71.03	0.65168	UID745
909	H0YFN7;Q4ADV7	909;1017	H0YFN7	H0YFN7	RAB6A-GEF complex partner protein 1	RIC1	PSSSGGFEFFRNRSISLSQSAENVPASKFSL		0.661396	0.852959	-0.0557899	-0.452821	-1.58761	-1.42197	-1.87683	-1.39642	-1.87815	-1.38331	-1.35878	-1.5775	-1.48731	-1.47168	-1.77936	NaN	S	2	___1		RAB6A-GEF complex partner protein 1												14-3-3 domain binding motif;Akt kinase substrate motif;Calmodulin-dependent protein kinase II substrate motif;Casein kinase II substrate motif;G protein-coupled receptor kinase 1 substrate motif;GSK3 kinase substrate motif;MAPKAPK1 kinase substrate motif;MAPKAPK2 kinase substrate motif;p70 Ribosomal S6 kinase substrate motif;Phosphorylase kinase substrate motif;PKA kinase substrate motif;PKC kina…	0.924304	0.0308535	40.278	26.598	40.278	4.2489	UID747
38	H0YJK1;H0YG16	38;262	H0YJK1	H0YJK1		KLC1	QERNNCLADSRALSASHTDLAH_________		0.34039	0.648899	0.237356	1.02292	-0.770885	NaN	-1.16694	NaN	-0.101107	-0.432619	-0.696932	-0.801474	-0.742422	NaN	-0.774982	-1.26041	S	2	___1														Casein kinase II substrate motif;Pyruvate dehydrogenase kinase substrate motif	0.998808	6.26507e-08	190.96	163.48	161.17	0.37857	UID748
7	H0YJK1;H0YG16;G3V5R9	7;231;591	H0YJK1	H0YJK1		KLC1	_________XMKRASSLNVLNVGGKAAEDRF		0.366188	0.674858	-0.239803	-0.951529	-1.52738	-1.32952	-1.60049	-1.0943	-1.2235	-0.577141	-0.674625	-1.43251	-0.407724	-0.931944	-1.48113	NaN	S	2	___1														14-3-3 domain binding motif;AMP-activated protein kinase substrate motif;Calmodulin-dependent protein kinase I substrate motif;Calmodulin-dependent protein kinase II alpha substrate motif;Calmodulin-dependent protein kinase II substrate motif;Calmodulin-dependent protein kinase IV substrate motif;Chk1 kinase substrate motif;MDC1 BRCT domain binding motif;Phosphorylase kinase substrate motif;PKA k…	0.999486	0.000910838	99.732	75.577	99.732	0.017859	UID749
270	H0YH12;Q9NVM9	270;623	H0YH12	H0YH12	Protein asunder homolog	ASUN	ERGKEELAEAEIIKDSPDSPEPPNKKPLVEM		0.133549	0.391985	-0.531663	-1.63285	-0.296211	-0.27202	-0.584398	-0.764435	-2.29516	-0.433823	-0.23551	-0.0871582	-0.424751	-0.455185	0.102547	-0.356014	S	3	___1	DUF2151	Protein asunder homolog												b-Adrenergic Receptor kinase substrate motif;Casein kinase II substrate motif;ERK1,2 kinase substrate motif;G protein-coupled receptor kinase 1 substrate motif;GSK-3, ERK1, ERK2, CDK5 substrate motif;PKA kinase substrate motif;PKC kinase substrate motif;WW domain binding motif	0.817644	0.0227904	43.291	35.487	43.291	0.13019	UID750
273	H0YH12;Q9NVM9	273;626	H0YH12	H0YH12	Protein asunder homolog	ASUN	KEELAEAEIIKDSPDSPEPPNKKPLVEMDET		0.670456	0.856518	-0.0858072	-0.438342	1.55473	1.76402	1.18881	1.3623	1.35619	1.10896	1.79271	1.79471	1.49629	1.23355	1.77234	0.760242	S	3	___1	DUF2151	Protein asunder homolog					Phosphoserine							b-Adrenergic Receptor kinase substrate motif;Casein kinase II substrate motif;ERK1,2 kinase substrate motif;G protein-coupled receptor kinase 1 substrate motif;GSK-3, ERK1, ERK2, CDK5 substrate motif;WW domain binding motif	0.999966	1.65619e-61	265.45	241.54	220.94	-0.14712	UID751
431	H0YJA2;Q6PJT7;G3V4R5;G3V411	431;515;192;217	H0YJA2	H0YJA2	Zinc finger CCCH domain-containing protein 14	ZC3H14	HLMQTRDLVQPDKPASPKFIVTLDGVPSPPG		0.971715	0.989086	0.00672785	0.0363547	2.17943	2.02233	1.53269	1.7472	2.19988	2.43438	2.51378	2.12054	1.64081	1.80583	2.14182	1.85275	S	2	___1		Zinc finger CCCH domain-containing protein 14					Phosphoserine					In isoform 3| isoform 10.;In isoform 4| isoform 6| isoform 11.;In isoform 8.		ERK1,2 kinase substrate motif;Growth associated histone HI kinase substrate motif;GSK-3, ERK1, ERK2, CDK5 substrate motif;PKA kinase substrate motif;PKC kinase substrate motif;WW domain binding motif	1	2.57297e-08	183	104.65	169.79	0.19727	UID754
325	H0YJA2;Q6PJT7;A0A087WTC9;G3V5I6;G3V256	325;409;82;254;409	H0YJA2	H0YJA2	Zinc finger CCCH domain-containing protein 14	ZC3H14	LLAEVVQGQSRTPRISPPIKEEETKGDSVEK		0.146797	0.409095	0.311651	1.63154	-0.650494	NaN	-1.11652	-0.988438	-0.869959	NaN	-1.15862	-0.977531	-1.68313	-1.41692	-0.85383	NaN	S	3	___1		Zinc finger CCCH domain-containing protein 14										In isoform 6.;In isoform 8.		ERK1,2 kinase substrate motif;GSK-3, ERK1, ERK2, CDK5 substrate motif;PKA kinase substrate motif;PKC kinase substrate motif;WW domain binding motif	0.995955	0.025231	44.878	17.615	44.878	1.4391	UID755
105	H0YNS8;H0YKM5;Q9NP66	105;105;105	H0YNS8	H0YNS8	High mobility group protein 20A	HMG20A	GRKRKKPLRDSNAPKSPLTGYVRFMNERREQ		0.464971	0.749312	0.189809	0.76725	-0.96109	NaN	-1.18913	-1.48392	-1.53465	-1.04903	-0.919069	-1.41615	-1.39939	-2.23337	-1.19888	NaN	S	2	___1	HMG_box	High mobility group protein 20A					Phosphoserine					In isoform 2.		Casein kinase II substrate motif;ERK1,2 kinase substrate motif;Growth associated histone HI kinase substrate motif;GSK-3, ERK1, ERK2, CDK5 substrate motif;WW domain binding motif	1	0.000181845	125.82	89.422	125.82	0.055154	UID756
46	H0YNE5;H0YLG5;Q96TC7	46;46;46	H0YNE5	H0YNE5	Regulator of microtubule dynamics protein 3	RMDN3	YSQRWKRTQRHGRSQSLPNSLDYTQTSDPGR		0.905082	0.967855	-0.0262025	-0.122647	2.27136	2.16376	2.38522	2.73455	2.60049	2.44686	2.61597	2.35737	2.90782	NaN	2.72832	1.69004	S	2	___1		Regulator of microtubule dynamics protein 3					Phosphoserine					In isoform 2.		14-3-3 domain binding motif;Calmodulin-dependent protein kinase II substrate motif;G protein-coupled receptor kinase 1 substrate motif;GSK3 kinase substrate motif;Phosphorylase kinase substrate motif;PKA kinase substrate motif;PKC kinase substrate motif	0.999953	2.59022e-98	353.3	320.59	273.94	-0.43291	UID757
1951	H0YM23;O75179	1951;2067	H0YM23	H0YM23	Ankyrin repeat domain-containing protein 17	ANKRD17	PGGVSRNSPLDCGSASPNKVASSSEQEAGSP		0.32352	0.628245	0.208954	1.04445	-0.429739	-0.107494	0.113232	0.558239	0.461168	0.567741	-0.0198097	-0.295673	0.113873	0.212439	-0.0863075	NaN	S	2	___1		Ankyrin repeat domain-containing protein 17		Ser-rich			Phosphoserine					In isoform 3.;In isoform 5.		Cdc2 kinase substrate motif;CDK kinase substrate motif;CDK1,2,4,6 kinase substrate motif;ERK1,2 kinase substrate motif;GSK-3, ERK1, ERK2, CDK5 substrate motif;WW domain binding motif	0.969565	0.000100245	112.24	90.004	112.24	0.18709	UID758
11	H0YNJ9	11	H0YNJ9	H0YNJ9		DUT	_____MPCSEETPAISPSKRARPAEVGGMQL		0.577411	0.824819	-0.26359	-0.578041	-0.875998	-1.22502	-0.218641	0.0761032	0.556606	0.174568	-0.0242977	-0.853962	1.03974	0.6579	-0.761744	NaN	S	2	___1														Casein kinase II substrate motif;Cdc2 kinase substrate motif;CDK kinase substrate motif;CDK1,2,4,6 kinase substrate motif;ERK1,2 kinase substrate motif;GSK-3, ERK1, ERK2, CDK5 substrate motif;WW domain binding motif	0.992736	1.2991e-55	337.22	309.57	265.16	-0.72987	UID759
20	H3BM38;O00161;H3BNG6;H3BU94;H3BNE1;H3BR18;H3BPJ0	20;20;20;20;20;20;20	H3BM38	H3BM38	Synaptosomal-associated protein;Synaptosomal-associated protein 23	SNAP23	SSEEIQQRAHQITDESLESTRRILGLAIESQ		0.185197	0.463457	0.20107	1.42292	-0.598412	-0.612591	-0.550838	-0.499327	-0.484255	-0.175974	-0.324421	-0.486443	-0.665808	-0.640839	-0.789314	-1.22099	S	3	___1		Synaptosomal-associated protein 23				t-SNARE coiled-coil homology 1	Phosphoserine							b-Adrenergic Receptor kinase substrate motif;Casein kinase II substrate motif;G protein-coupled receptor kinase 1 substrate motif	0.998576	3.76479e-11	155.28	141.31	100.43	-0.37278	UID760
110	H3BM38;O00161;H3BV99;H3BP15;H3BQY9	110;110;67;61;61	H3BM38	H3BM38	Synaptosomal-associated protein;Synaptosomal-associated protein 23	SNAP23	SGKAYKTTWGDGGENSPCNVVSKQPGPVTNG		0.00869785	0.0994583	-0.36202	-3.44976	-0.450619	-0.381886	-0.633818	-0.440599	-0.766899	-0.818867	-0.110191	-0.380116	-0.161718	NaN	-0.228352	NaN	S	2	___1	SNAP-25	Synaptosomal-associated protein 23					Phosphoserine					In isoform SNAP-23b.		ERK1,2 kinase substrate motif;GSK-3, ERK1, ERK2, CDK5 substrate motif;WW domain binding motif	0.98315	0.016507	49.423	34.547	49.423	-2.6637	UID761
32	H3BMI8;Q9NYB0	32;203	H3BMI8	H3BMI8	Telomeric repeat-binding factor 2-interacting protein 1	TERF2IP	LRGQEHKYLLGDAPVSPSSQKLKRKAEEDPE		0.0531584	0.235906	-0.343874	-2.19197	2.10644	1.99423	1.94793	2.04605	2.08468	2.40787	2.77966	2.55834	2.45642	2.53962	2.55044	1.76596	S	2	___1		Telomeric repeat-binding factor 2-interacting protein 1					Phosphoserine							Casein kinase II substrate motif;ERK1,2 kinase substrate motif;GSK-3, ERK1, ERK2, CDK5 substrate motif;WW domain binding motif	0.996448	1.8969e-27	271.53	222.03	243.92	0.19331	UID762	CDK2
41	H3BTK3;I3L3X8;H3BSW7;H3BUY4;H3BPY5;H3BNU9;Q9Y2V2	41;41;41;41;41;41;41	H3BTK3	H3BTK3	Calcium-regulated heat stable protein 1	CARHSP1	SRERSPSPLRGNVVPSPLPTRRTRTFSATVR		0.185048	0.463685	-0.376451	-1.43523	-0.369314	-0.548092	-1.00969	-0.165358	0.229511	0.319437	0.0967884	0.337313	0.532558	-0.331974	-0.038681	NaN	S	2	___1		Calcium-regulated heat stable protein 1					Phosphoserine	Reduced affinity for single-stranded DNA. Abolishes location at cytoplasmic stress granules						DNA dependent Protein kinase substrate motif;ERK1,2 kinase substrate motif;G protein-coupled receptor kinase 1 substrate motif;GSK-3, ERK1, ERK2, CDK5 substrate motif;WW domain binding motif	0.998284	0.00115999	97.452	85.962	88.338	0.54135	UID766	DYRK2
52	H3BTK3;I3L3X8;H3BSW7;H3BUY4;H3BPY5;H3BNU9;Q9Y2V2	52;52;52;52;52;52;52	H3BTK3	H3BTK3	Calcium-regulated heat stable protein 1	CARHSP1	NVVPSPLPTRRTRTFSATVRASQGPVYKGVC		0.607339	0.833245	-0.19133	-0.532403	-1.40477	-1.5574	-1.36802	-0.767448	0.146088	-0.627649	-0.982374	NaN	0.102085	-0.798582	-0.715755	-1.29806	S	2	___1		Calcium-regulated heat stable protein 1					Phosphoserine							14-3-3 domain binding motif;Akt kinase substrate motif;AMP-activated protein kinase 2 substrate motif;Calmodulin-dependent protein kinase II substrate motif;Casein kinase II substrate motif;MAPKAPK1 kinase substrate motif;PKA kinase substrate motif;PKC kinase substrate motif	0.999967	0.000415779	133.12	22.905	133.12	-0.17052	UID767	SGK1;p90RSK;Akt1
37	H3BRL9;H3BPD5;P78549	37;51;71	H3BRL9	H3BRL9	Endonuclease III-like protein 1	NTHL1	KRPRKAQRLRVAYEGSDSEKGEGAEPLKVPV		0.216672	0.505318	0.302888	1.34124	-0.000717163	-0.596601	NaN	-0.745054	-0.149227	NaN	-1.16647	-0.712509	-0.300573	-0.859423	-0.253853	-0.7619	S	2	___1		Endonuclease III-like protein 1					Phosphoserine							Casein kinase II substrate motif	0.995681	5.37727e-29	194.51	172.63	127.83	3.3817	UID770
110	H3BPZ1;H3BS72;Q9P035;H3BRL8;H3BMZ1	110;173;135;18;18	H3BPZ1	H3BPZ1	Very-long-chain (3R)-3-hydroxyacyl-CoA dehydratase 3	HACD3	LRAKEEERLNKLRLESEGSPETLTNLRKGYL		0.0349848	0.19646	0.462543	2.43773	-0.95303	-1.30466	-1.22373	-0.856245	-0.9037	-0.492125	-1.74968	-1.28832	-1.25741	-1.18479	-1.04875	-1.97979	S	2	___1		Very-long-chain (3R)-3-hydroxyacyl-CoA dehydratase 3	+										Cytoplasmic	14-3-3 domain binding motif;b-Adrenergic Receptor kinase substrate motif;Calmodulin-dependent protein kinase II substrate motif;Casein kinase II substrate motif;G protein-coupled receptor kinase 1 substrate motif;MAPKAPK1 kinase substrate motif;PKA kinase substrate motif;PKC kinase substrate motif	0.999875	0.000469682	96.464	76.677	96.464	-1.1662	UID771
89	H3BPZ1;H3BS72;Q9P035	89;152;114	H3BPZ1	H3BPZ1	Very-long-chain (3R)-3-hydroxyacyl-CoA dehydratase 3	HACD3	RPLFLAPDFDRWLDESDAEMELRAKEEERLN		0.601543	0.829477	0.153569	0.539205	4.49586	4.71776	4.6686	4.74436	4.64024	4.68426	3.33264	4.43113	5.08407	5.06188	4.98636	4.13359	S	2	___1		Very-long-chain (3R)-3-hydroxyacyl-CoA dehydratase 3	+				Phosphoserine					In isoform 2.	Cytoplasmic	b-Adrenergic Receptor kinase substrate motif;Casein kinase II substrate motif	1	7.98352e-22	265.22	233.38	216.34	-0.76596	UID772
135	H3BUL5;H3BVF8;H3BQG1;P49761	135;135;169;283	H3BUL5	H3BUL5	Dual specificity protein kinase CLK3	CLK3	SASSRSQQSSKRSSRSVEDDKEGHLVCRIGD		0.166142	0.433041	0.295257	1.50675	0.608416	0.524279	-0.393833	0.297079	0.263155	0.402733	-0.300312	0.313513	-0.27084	0.210035	-0.0104923	NaN	S	3	___1		Dual specificity protein kinase CLK3					Phosphoserine					In isoform 2.		Casein kinase II substrate motif;Pyruvate dehydrogenase kinase substrate motif	1	0.000817435	96.993	80.594	42.277	-0.22662	UID775
9	H3BUL5;H3BVF8;H3BQG1;P49761;H3BRT8;H3BQR7;H3BV35;H3BRK0	9;9;29;157;9;9;24;30	H3BUL5	H3BUL5	Dual specificity protein kinase CLK3	CLK3	_______MHHCKRYRSPEPDPYLSYRWKRRR		0.399442	0.700545	0.279741	0.880139	1.01619	1.24375	-0.480015	0.352589	0.505035	0.444107	0.277838	0.832361	0.056284	0.413559	0.457077	-0.633905	S	3	___1		Dual specificity protein kinase CLK3					Phosphoserine							14-3-3 domain binding motif;Calmodulin-dependent protein kinase II substrate motif;Casein kinase II substrate motif;ERK1,2 kinase substrate motif;Growth associated histone HI kinase substrate motif;GSK-3, ERK1, ERK2, CDK5 substrate motif;PKA kinase substrate motif;PKC kinase substrate motif;WW domain binding motif;ZIP kinase substrate motif	0.999989	2.41028e-12	214.48	173.48	140.46	0.35535	UID776	Chk1
161	H3BQZ7;Q1KMD3	161;161	H3BQZ7	H3BQZ7	Heterogeneous nuclear ribonucleoprotein U-like protein 2	HNRNPUL2-BSCL2;HNRNPUL2	EQGLGKREEDEPEERSGDETPGSEVPGDKAA		0.518022	0.784597	0.127186	0.670012	2.18336	2.04786	1.53266	1.73838	2.28725	1.93684	1.4529	1.77886	2.00133	1.3538	2.30384	2.07251	S	2	___1		Heterogeneous nuclear ribonucleoprotein U-like protein 2		Glu-rich			Phosphoserine							Casein kinase I substrate motif;Casein kinase II substrate motif;G protein-coupled receptor kinase 1 substrate motif	1	2.58906e-27	247.73	228.27	247.73	0.21756	UID777
109	J3KSZ6;U3KQ35;H3BR06;Q15554	109;139;244;365	J3KSZ6	J3KSZ6	Telomeric repeat-binding factor 2	TERF2	LDQKDLVLPTQALPASPALKNKRPRKDENES		0.189249	0.469078	-0.246912	-1.4087	1.4772	1.51278	1.60039	1.60551	1.61926	2.1809	2.25278	2.05841	1.82642	1.71166	2.25176	1.37646	S	2	___1		Telomeric repeat-binding factor 2					Phosphoserine					In isoform 2.		ERK1,2 kinase substrate motif;GSK-3, ERK1, ERK2, CDK5 substrate motif;WW domain binding motif	1	4.17459e-22	222.42	196.69	221.34	0.30079	UID778	CDK2;ERK2
177	H3BRE6;J3KNZ9	177;333	H3BRE6	H3BRE6		FBRS	PSLPPPPQPQLQLRVSPFGLRTSPYGSSLDL		0.874956	0.955164	0.133466	0.162481	NaN	-1.11872	-1.27214	-1.27089	-1.02607	NaN	-0.27293	-0.355368	-1.32611	-0.739708	-0.642092	-4.49632	S	2	___1														AMP-activated protein kinase substrate motif;ERK1,2 kinase substrate motif;GSK-3, ERK1, ERK2, CDK5 substrate motif;PKA kinase substrate motif;PKC kinase substrate motif;WW domain binding motif	1	0.00347076	95.909	63.017	40.067	0.14324	UID779
52	H3BS42;Q9H5H4	52;83	H3BS42	H3BS42	Zinc finger protein 768	ZNF768	QSPEFEPQSPRFEPESPGFESRSPGLVPPSP		0.572835	0.821046	0.122553	0.582954	1.62601	1.49126	1.16109	1.50212	1.69424	1.69275	1.59214	1.76962	1.26448	1.43887	1.83077	0.536266	S	2	___1	RNA_pol_Rpb1_R	Zinc finger protein 768		Pro-rich			Phosphoserine							b-Adrenergic Receptor kinase substrate motif;Casein kinase I substrate motif;ERK1,2 kinase substrate motif;GSK-3, ERK1, ERK2, CDK5 substrate motif;WW domain binding motif	1	1.2492e-07	167.84	121.49	167.84	0.059962	UID781
87	H3BS42;Q9H5H4	87;118	H3BS42	H3BS42	Zinc finger protein 768	ZNF768	RSPESDSQSPEFESQSPRYEPQSPGYEPRSP		0.902312	0.966793	0.0535612	0.128025	-0.937181	-0.675077	0.186172	-0.507296	NaN	NaN	0.0194569	NaN	-0.0938625	-0.58742	NaN	-1.4858	S	2	___1	RNA_pol_Rpb1_R	Zinc finger protein 768		Pro-rich										Casein kinase I substrate motif;Casein kinase II substrate motif;ERK1,2 kinase substrate motif;Growth associated histone HI kinase substrate motif;GSK-3, ERK1, ERK2, CDK5 substrate motif;PKA kinase substrate motif;PKC kinase substrate motif;WW domain binding motif	0.95672	1.07896e-09	147.7	130.75	147.7	-0.7582	UID782
59	H3BS42;Q9H5H4	59;90	H3BS42	H3BS42	Zinc finger protein 768	ZNF768	QSPRFEPESPGFESRSPGLVPPSPEFAPRSP		0.288615	0.594208	-0.243283	-1.13657	-0.998928	-1.32448	-1.33656	-1.74438	-1.16573	-1.43837	-0.627802	-1.04104	NaN	NaN	-1.02441	-1.67257	S	2	___1		Zinc finger protein 768		Pro-rich			Phosphoserine							Casein kinase I substrate motif;ERK1,2 kinase substrate motif;Growth associated histone HI kinase substrate motif;GSK-3, ERK1, ERK2, CDK5 substrate motif;WW domain binding motif	1	1.05358e-11	152.34	125.82	150.37	0.85198	UID783
66	H3BS42;Q9H5H4	66;97	H3BS42	H3BS42	Zinc finger protein 768	ZNF768	ESPGFESRSPGLVPPSPEFAPRSPESDSQSP		0.549503	0.808834	-0.13603	-0.621793	-1.32602	-1.65413	-1.52535	-1.50246	-0.910339	-0.940611	-0.949965	-1.05306	-1.6137	-1.58094	-0.67127	NaN	S	2	___1		Zinc finger protein 768		Pro-rich			Phosphoserine							Casein kinase II substrate motif;DNA dependent Protein kinase substrate motif;ERK1,2 kinase substrate motif;G protein-coupled receptor kinase 1 substrate motif;GSK-3, ERK1, ERK2, CDK5 substrate motif;WW domain binding motif	1	1.05358e-11	152.34	125.82	150.37	0.85198	UID784
94	H3BS42;Q9H5H4	94;125	H3BS42	H3BS42	Zinc finger protein 768	ZNF768	QSPEFESQSPRYEPQSPGYEPRSPGYEPRSP		0.977306	0.990764	-0.00657336	-0.0291664	-0.753887	-1.04095	-0.509171	-0.180651	-0.546906	-1.31129	-1.29263	-0.556234	-0.405853	-0.497402	-0.462833	-1.08846	S	2	___1	RNA_pol_Rpb1_R	Zinc finger protein 768		Pro-rich										Casein kinase I substrate motif;Casein kinase II substrate motif;ERK1,2 kinase substrate motif;GSK-3, ERK1, ERK2, CDK5 substrate motif;WW domain binding motif	1	1.17487e-07	163.71	127.03	152.47	-0.5433	UID785
108	H3BS42;Q9H5H4	108;139	H3BS42	H3BS42	Zinc finger protein 768	ZNF768	QSPGYEPRSPGYEPRSPGYESESSRYESQNT		0.67112	0.856968	-0.125625	-0.440666	-1.85314	-2.058	-0.953516	-0.858681	-0.984114	-1.64903	-1.61373	-1.30219	-1.05569	-1.09688	NaN	NaN	S	2	___1	RNA_pol_Rpb1_R	Zinc finger protein 768		Pro-rich										Casein kinase I substrate motif;Casein kinase II substrate motif;ERK1,2 kinase substrate motif;Growth associated histone HI kinase substrate motif;GSK-3, ERK1, ERK2, CDK5 substrate motif;WW domain binding motif	1	0.000255576	105.2	54.5	105.2	-0.42852	UID786	mTOR
129	H3BS42;Q9H5H4	129;160	H3BS42	H3BS42	Zinc finger protein 768	ZNF768	ESSRYESQNTELKTQSPEFEAQSSKFQEGAE		0.771834	0.910057	0.0521887	0.299987	-0.0656052	-0.180031	-0.0325089	0.421089	0.698841	0.249846	NaN	0.127523	0.128408	0.0484543	0.214613	NaN	S	2	___1		Zinc finger protein 768					Phosphoserine							Casein kinase II substrate motif;ERK1,2 kinase substrate motif;GSK-3, ERK1, ERK2, CDK5 substrate motif;PKA kinase substrate motif;PKC kinase substrate motif;WW domain binding motif	0.999997	3.3006e-09	195.94	151.56	189.07	-0.64085	UID787
1231	H3BTC1;O14654	12;1231	H3BTC1;O14654	O14654	Insulin receptor substrate 4	IRS4	____RRVPRPPEREDSDNDDDTHVRMDFARR		0.484688	0.77129	0.292152	0.725651	3.5014	3.58112	3.46169	4.25886	4.81783	4.06407	2.12146	3.33866	4.01036	3.93907	4.38699	4.13553	S	2	___1		Insulin receptor substrate 4												14-3-3 domain binding motif;b-Adrenergic Receptor kinase substrate motif;Calmodulin-dependent protein kinase II substrate motif;Casein kinase II substrate motif;PKA kinase substrate motif;PKC epsilon kinase substrate motif;PKC kinase substrate motif;Pyruvate dehydrogenase kinase substrate motif	1	1.01994e-29	297.53	255.43	297.53	-1.4609	UID789
67	H3BTX0;Q9BTK6	67;237	H3BTX0	H3BTX0	PAXIP1-associated glutamate-rich protein 1	PAGR1	GRDLFSLDSEDPSPASPPLRSSGSSLFPRQR		0.39894	0.702297	-0.161787	-0.881112	0.0681534	0.177568	0.00768089	0.0673828	0.121078	0.0808945	0.211718	0.473881	0.0506783	0.439528	0.811205	-0.49353	S	2	___1		PAXIP1-associated glutamate-rich protein 1					Phosphoserine							ERK1,2 kinase substrate motif;GSK-3, ERK1, ERK2, CDK5 substrate motif;WW domain binding motif	0.999916	6.20666e-61	319.15	280.54	319.15	-0.128	UID792
600	H3BUF6;Q8WWM7	600;594	H3BUF6	H3BUF6	Ataxin-2-like protein	ATXN2L	KEKEVDGLLTSEPMGSPVSSKTESVSDKEDK		0.0632513	0.259039	0.409822	2.08885	0.316147	0.0489273	0.464798	0.454155	0.897423	0.81868	0.14908	0.251616	0.0914192	0.284729	0.382553	-0.618202	S	2	___1		Ataxin-2-like protein					Phosphoserine					In isoform 7.		Casein kinase II substrate motif;ERK1,2 kinase substrate motif;G protein-coupled receptor kinase 1 substrate motif;GSK3 kinase substrate motif;GSK-3, ERK1, ERK2, CDK5 substrate motif;WW domain binding motif	0.978416	1.17944e-18	174.95	150.69	174.95	-1.9342	UID793
19	H3BUX2;J3KNF8;O43169;D6RFH4	19;23;19;19	H3BUX2	H3BUX2	Cytochrome b5 type B	CYB5B	AEASGSDGKGQEVETSVTYYRLEEVAKRNSL		0.40727	0.707757	0.190213	0.881549	NaN	-1.2336	-1.58289	-1.14353	-1.0843	-1.10263	-0.906618	-1.35481	-1.95394	-1.46304	NaN	NaN	S	2	___1		Cytochrome b5 type B												Casein kinase II substrate motif	0.947273	6.04678e-13	159	128.75	156.81	-0.32331	UID794
105	H7BXF3;P62995;H7C2L4;Q13595	105;266;85;262	H7BXF3;Q13595	H7BXF3	Transformer-2 protein homolog beta;Transformer-2 protein homolog alpha	TRA2B;TRA2A	DDRDYYSRSYRRRSPSPYYSRGGYRSRSRSR		0.498422	0.775054	0.128429	0.702453	-0.607435	-0.360678	-0.206858	-0.19261	-0.512232	-0.17202	0.0378952	-0.236673	-0.360203	-0.52446	-0.563745	-1.17522	S	2	___1		Transformer-2 protein homolog alpha;Transformer-2 protein homolog beta		Arg/Ser-rich (RS2 domain)								In isoform 2.;In isoform Short.		14-3-3 domain binding motif;Akt kinase substrate motif;Calmodulin-dependent protein kinase II substrate motif;Casein kinase II substrate motif;DNA dependent Protein kinase substrate motif;ERK1,2 kinase substrate motif;G protein-coupled receptor kinase 1 substrate motif;GSK3 kinase substrate motif;GSK-3, ERK1, ERK2, CDK5 substrate motif;MAPKAPK1 kinase substrate motif;PKA kinase substrate motif;PK…	1	5.17328e-14	199.15	83.009	124.67	0.21806	UID797
68	H7BYJ3;O14578	68;440	H7BYJ3	H7BYJ3	Citron Rho-interacting kinase	CIT	LGILGRSESVVSGLDSPAKTSSMEKKLLIKS		0.0990914	0.337758	-0.323485	-1.83886	-0.334871	-0.816002	-0.881935	-0.640108	-0.262856	-0.409235	NaN	0.0705128	-0.645969	-0.496567	-0.155127	0.0570698	S	2	___1		Citron Rho-interacting kinase					Phosphoserine					In isoform 3.		b-Adrenergic Receptor kinase substrate motif;Cdc2 kinase substrate motif;CDK kinase substrate motif;CDK1,2,4,6 kinase substrate motif;ERK1,2 kinase substrate motif;G protein-coupled receptor kinase 1 substrate motif;GSK-3, ERK1, ERK2, CDK5 substrate motif;MAPKAPK2 kinase substrate motif;WW domain binding motif	0.999902	1.34386e-07	143.05	100.66	143.05	0.48518	UID801
860	H7BYN4;Q02241	860;867	H7BYN4	H7BYN4	Kinesin-like protein;Kinesin-like protein KIF23	KIF23	LAKCEKYMLTHQELASDGEIETKLIKGDIYK		0.678069	0.864982	0.111945	0.427508	-0.979038	-1.10985	-2.17209	-1.79591	-1.77712	-1.18574	-1.40421	-1.56214	-1.24331	-2.02232	-1.2096	-2.24983	S	3	___1	MKLP1_Arf_bdg	Kinesin-like protein KIF23					Phosphoserine		Interaction with ARF6					Casein kinase I substrate motif;Casein kinase II substrate motif	0.9878	0.022645	41.798	33.408	41.798	-1.3927	UID802
92	H7BZJ7;Q9BXW9	92;592	H7BZJ7	H7BZJ7	Fanconi anemia group D2 protein	FANCD2	GAVTMAGIMAADRSESPSLTQERANLSDEQC		0.870566	0.951945	0.0249554	0.167173	-1.29054	-1.15249	-0.80035	-0.833529	-0.40634	-0.738659	-0.894226	-0.852844	-0.93376	-0.839703	-0.638107	-1.21301	S	2	___1	FancD2	Fanconi anemia group D2 protein					Phosphoserine					In isoform 4.		14-3-3 domain binding motif;b-Adrenergic Receptor kinase substrate motif;Calmodulin-dependent protein kinase II substrate motif;Casein kinase II substrate motif;ERK1,2 kinase substrate motif;G protein-coupled receptor kinase 1 substrate motif;GSK-3, ERK1, ERK2, CDK5 substrate motif;PKA kinase substrate motif;PKC kinase substrate motif;WW domain binding motif	0.999701	0.00156714	93.258	67.215	93.258	1.537	UID803
275	H7C128;H7C179;H7C127	275;279;279	H7C128	H7C128		BRD8	PLLSELLKKGSLLPTSPRLVNESEMAVASGH		0.158885	0.421614	-0.466957	-1.57663	-1.0038	-1.20702	NaN	-1.62572	-1.69241	-1.10289	-0.38867	-0.417061	NaN	-1.57914	-1.05277	NaN	S	2	___1														ERK1,2 kinase substrate motif;Growth associated histone HI kinase substrate motif;GSK-3, ERK1, ERK2, CDK5 substrate motif;PKA kinase substrate motif;PKC kinase substrate motif;WW domain binding motif	0.80123	0.00405547	78.488	41.297	78.488	0.32216	UID805
221	H7C148;H7C3F5;O75175	221;118;299	H7C148	H7C148	CCR4-NOT transcription complex subunit 3	CNOT3	DDKKRGRSTDSEVSQSPAKNGSKPVHSNQHP		0.819774	0.930899	-0.0933707	-0.236557	-1.17079	-1.92631	-0.353781	-0.134245	NaN	-0.945065	-1.32351	-0.791374	NaN	-0.4475	NaN	-0.68829	S	2	___1		CCR4-NOT transcription complex subunit 3					Phosphoserine							Cdc2 kinase substrate motif;CDK kinase substrate motif;CDK1,2,4,6 kinase substrate motif;ERK1,2 kinase substrate motif;GSK-3, ERK1, ERK2, CDK5 substrate motif;WW domain binding motif	0.999998	4.79616e-22	272.54	212.43	272.54	2.7714	UID806
1183	H7C2P2;Q58EX2	1183;2026	H7C2P2	H7C2P2	Protein sidekick-2	SDK2	YTRSPPRPSPGSLHYSDEDVTKYNDLIPAES		0.313134	0.620085	-0.322176	-1.1009	-1.8192	-0.527298	-1.26435	NaN	-0.817991	NaN	-0.940502	-0.621555	-0.901339	NaN	-0.676737	NaN	S	3	___1		Protein sidekick-2										In isoform 2.	Cytoplasmic	Casein kinase II substrate motif;MAPKAPK2 kinase substrate motif;Pyruvate dehydrogenase kinase substrate motif	0.804188	0.000775462	67.136	58.486	67.136	1.005	UID808
80	H7C3D5;Q8NC44	80;385	H7C3D5	H7C3D5	Protein FAM134A	FAM134A	DLLGRPQALSRQALDSEEEEEDVAAKETLLR		0.278573	0.584941	0.124383	1.1624	1.27237	1.42045	1.16693	1.47514	1.25152	1.50775	NaN	1.01924	1.27674	1.48629	1.11631	NaN	S	2	___1		Protein FAM134A					Phosphoserine							b-Adrenergic Receptor kinase substrate motif;BARD1 BRCT domain binding motif;Casein kinase II substrate motif;G protein-coupled receptor kinase 1 substrate motif	1	9.15864e-77	352.75	327.1	352.75	0.079057	UID810
1857	H9KVB4;O15417	1857;1857	H9KVB4	H9KVB4	Trinucleotide repeat-containing gene 18 protein	TNRC18	ASGGGYRLGARERALSPGLEESGLGLLARFA		0.309751	0.618337	0.188887	1.08448	-2.48784	-2.95332	-2.50332	NaN	-2.10776	-2.11748	-2.77707	-2.54782	-2.67476	-2.75974	-2.35476	NaN	S	2	___1		Trinucleotide repeat-containing gene 18 protein					Phosphoserine					In isoform 3.		14-3-3 domain binding motif;Akt kinase substrate motif;Calmodulin-dependent protein kinase II substrate motif;ERK1,2 kinase substrate motif;GSK-3, ERK1, ERK2, CDK5 substrate motif;MAPKAPK1 kinase substrate motif;PKA kinase substrate motif;PKC kinase substrate motif;WW domain binding motif	0.999947	0.00671608	58.676	44.257	58.676	0.87526	UID811
16	H9KVD1;Q96QD9	16;16	H9KVD1	H9KVD1	UAP56-interacting factor	FYTTD1	MNRFGTRLVGATATSSPPPKARSNENLDKID		0.393547	0.699653	0.183225	0.909046	-1.68958	-1.43217	-2.10913	NaN	NaN	-1.50347	-1.49535	-1.6472	-1.98137	-1.95963	-2.2505	NaN	S	2	___1	FYTT	UAP56-interacting factor										In isoform 2.;In isoform 3.		ERK1,2 kinase substrate motif;GSK-3, ERK1, ERK2, CDK5 substrate motif;MDC1 BRCT domain binding motif;Plk1 PBD domain binding motif;WW domain binding motif	0.954859	4.11423e-05	110.92	63.029	110.92	2.4424	UID812
26	I1E4Y6;Q6Y7W6;E7ESB6;C9JHW1;C9JW88;F8WCD5;C9JPV7;C9JXQ0;C9J0V6;C9JHT0;C9JRZ2	26;26;26;26;26;26;26;26;26;26;26	I1E4Y6	I1E4Y6	PERQ amino acid-rich with GYF domain-containing protein 2	GIGYF2	GPEWLRALSSGGSITSPPLSPALPKYKLADY		0.357494	0.668133	0.196305	0.969781	0.938696	0.641552	0.481188	0.441568	0.84609	0.944929	0.991089	0.637928	-0.0422516	0.190056	0.820007	NaN	S	2	___1		PERQ amino acid-rich with GYF domain-containing protein 2					Phosphoserine							ERK1,2 kinase substrate motif;G protein-coupled receptor kinase 1 substrate motif;GSK3 kinase substrate motif;GSK-3, ERK1, ERK2, CDK5 substrate motif;WW domain binding motif	0.999318	7.82951e-62	306.4	283.17	258.17	1.0664	UID813
160	I1E4Y6;Q6Y7W6;E7ESB6	160;160;160	I1E4Y6	I1E4Y6	PERQ amino acid-rich with GYF domain-containing protein 2	GIGYF2	GVFGRGGGREMHRSQSWEERGDRRFEKPGRK		0.927851	0.975288	0.0466843	0.0944179	NaN	NaN	-1.32494	-1.52161	-2.0602	-1.72059	NaN	-3.10253	-1.14902	-1.37393	-1.18859	NaN	S	2	___1		PERQ amino acid-rich with GYF domain-containing protein 2		Arg-rich			Phosphoserine							14-3-3 domain binding motif;Calmodulin-dependent protein kinase II substrate motif;Calmodulin-dependent protein kinase IV substrate motif;Casein kinase II substrate motif;Chk1 kinase substrate motif;PKA kinase substrate motif;PKC kinase substrate motif	0.994821	0.01546	64.711	45.929	64.711	-0.43214	UID814
258	I1E4Y6;Q6Y7W6;C9JH78;C9IYH5	258;236;63;67	I1E4Y6	I1E4Y6	PERQ amino acid-rich with GYF domain-containing protein 2	GIGYF2	RLAGSRRDGERWRPHSPDGPRSAGWREHMER		0.512654	0.779384	0.480724	0.689594	0.580971	0.775143	-0.597158	NaN	1.23335	NaN	1.40265	0.993612	-1.39893	-0.908546	-0.00201988	NaN	S	3	___1		PERQ amino acid-rich with GYF domain-containing protein 2		Arg-rich			Phosphoserine							14-3-3 domain binding motif;Akt kinase substrate motif;Calmodulin-dependent protein kinase II substrate motif;ERK1,2 kinase substrate motif;G protein-coupled receptor kinase 1 substrate motif;GSK-3, ERK1, ERK2, CDK5 substrate motif;MAPKAPK1 kinase substrate motif;PKA kinase substrate motif;PKC kinase substrate motif;WW domain binding motif	1	6.29692e-06	136.21	121.61	128.35	1.2134	UID815
1083	I3L1L3;Q9BQG0	1083;1163	I3L1L3	I3L1L3	Myb-binding protein 1A	MYBBP1A	KLEKKDAKEIPSATQSPISKKRKKKGFLPET		0.0214955	0.156655	0.650369	2.7773	0.84082	0.522146	0.949577	0.843182	0.902641	1.20754	0.969297	0.306927	0.200199	-0.508467	0.168451	NaN	S	2	___1		Myb-binding protein 1A					Phosphoserine		Required for nuclear and nucleolar localization					Casein kinase II substrate motif;ERK1,2 kinase substrate motif;GSK-3, ERK1, ERK2, CDK5 substrate motif;MAPKAPK2 kinase substrate motif;WW domain binding motif	0.987676	1.3283e-08	149.82	116.56	149.82	0.68752	UID818
64	I3L254;Q01664	64;124	I3L254	I3L254	Transcription factor AP-4	TFAP4	QNTQLKRFIQELSGSSPKRRRAEDKDEGIGS		0.420651	0.71952	-0.195666	-0.85538	0.870096	0.824606	NaN	0.806063	0.270266	1.02535	1.35173	1.14514	0.905775	NaN	0.417122	NaN	S	2	___1		Transcription factor AP-4					Phosphoserine							Cdc2 kinase substrate motif;CDK kinase substrate motif;CDK1,2,4,6 kinase substrate motif;ERK1,2 kinase substrate motif;Growth associated histone HI kinase substrate motif;GSK-3, ERK1, ERK2, CDK5 substrate motif;MDC1 BRCT domain binding motif;PKA kinase substrate motif;PKC kinase substrate motif;Plk1 PBD domain binding motif;WW domain binding motif	0.952804	2.03749e-08	202.29	158.99	202.29	0.14857	UID820
919	I3L4N6;Q9UP95	919;967	I3L4N6	I3L4N6	Solute carrier family 12 member 4	SLC12A4	LVKDRHSALRLESLYSDEEDESAVGADKIQM		0.161361	0.426853	-0.290543	-1.56587	NaN	-0.331419	-0.610111	-0.190168	-0.807775	-0.345648	NaN	-0.600014	-0.181047	0.0337944	0.0813408	NaN	S	2	___1	SLC12	Solute carrier family 12 member 4					Phosphoserine					In isoform 4.	Cytoplasmic	BARD1 BRCT domain binding motif;Casein kinase II substrate motif	0.999992	4.42483e-13	159.81	131.9	159.81	-0.30539	UID821
456	J3KMX1;Q99567	456;517	J3KMX1	J3KMX1	Nuclear pore complex protein Nup88	NUP88	SPPLLCTREDVEVAESPLRVLAETPDSFEKH		0.0434868	0.217236	0.466486	2.34744	0.0786991	-0.649004	-0.301395	-0.22224	-0.250471	0.201376	-0.527071	-0.728106	-0.467051	-1.24353	-0.319206	NaN	S	2	___1	Nup88	Nuclear pore complex protein Nup88					Phosphoserine							b-Adrenergic Receptor kinase substrate motif;Cdc2 kinase substrate motif;CDK kinase substrate motif;CDK1,2,4,6 kinase substrate motif;ERK1,2 kinase substrate motif;GSK-3, ERK1, ERK2, CDK5 substrate motif;WW domain binding motif	1	1.11304e-07	185.59	156.25	185.59	-1.196	UID823
142	J3KMZ8;Q92785	142;142	J3KMZ8	J3KMZ8	Zinc finger protein ubi-d4	DPF2	PLEKRGAPDPRVDDDSLGEFPVTNSRARKRI		0.808528	0.923632	0.0728064	0.253251	0.440508	0.480497	NaN	0.117525	NaN	0.721035	-0.334223	0.347755	0.893702	0.561106	NaN	NaN	S	2	___1		Zinc finger protein ubi-d4					Phosphoserine							b-Adrenergic Receptor kinase substrate motif;Casein kinase I substrate motif;Casein kinase II substrate motif;Plk1 kinase substrate motif	1	1.4005e-18	204.52	173.13	203.04	-1.6301	UID824
87	J3KNN7;Q7Z569	87;117	J3KNN7	J3KNN7	BRCA1-associated protein	BRAP	RSKDHSKECINAAPDSPSKQLPDQISFFSGN		0.83285	0.936752	0.0509199	0.216632	-1.12428	-1.2269	-0.680128	-0.554522	0.0949192	-0.133646	-0.710201	-0.955528	-0.425587	-0.33272	-0.829639	-0.676405	S	2	___1		BRCA1-associated protein										In isoform 2.		b-Adrenergic Receptor kinase substrate motif;Casein kinase II substrate motif;Cdc2 kinase substrate motif;CDK kinase substrate motif;CDK1,2,4,6 kinase substrate motif;ERK1,2 kinase substrate motif;GSK-3, ERK1, ERK2, CDK5 substrate motif;WW domain binding motif	0.914983	2.13162e-09	203.32	177.38	162.48	-0.4035	UID826
40	J3KSV9;J3KS37;O94762	40;155;815	J3KSV9	J3KSV9	ATP-dependent DNA helicase Q5	RECQL5	APEKYTGEEDGAGGHSPAPPQTEECLRERPS		0.0157758	0.138716	-0.480466	-3.33158	NaN	NaN	0.102367	0.282686	0.649052	0.089407	NaN	0.82972	0.70723	0.616753	0.891676	NaN	S	3	___1	RecQ5	ATP-dependent DNA helicase Q5					Phosphoserine					In isoform Alpha.;In isoform Gamma.		ERK1,2 kinase substrate motif;G protein-coupled receptor kinase 1 substrate motif;GSK-3, ERK1, ERK2, CDK5 substrate motif;WW domain binding motif	1	1.21007e-13	161.2	145.19	157.24	-0.55691	UID830
48	J3KS45;J3KTQ7;J9JIE6;Q9UM00	48;111;111;60	J3KS45	J3KS45	Transmembrane and coiled-coil domain-containing protein 1	TMCO1	KQSKKLEKKKETITESAGRQQKKKIERQEEK		0.00385732	0.0595	1.01042	4.23643	-2.06003	-1.69983	-1.90636	-1.4438	NaN	-2.04479	-2.70437	-2.45696	NaN	NaN	-2.70748	-3.4967	S	2	___1	DUF106	Transmembrane and coiled-coil domain-containing protein 1	+				Phosphoserine							b-Adrenergic Receptor kinase substrate motif	0.989302	0.021193	70.942	38.471	70.942	2.4603	UID831
41	J3KSH8;J3KT51;Q9UK76	41;87;87	J3KSH8	J3KSH8	Hematological and neurological expressed 1 protein;Hematological and neurological expressed 1 protein, N-terminally processed	HN1	GGREDLESSGLQRRNSSEASSGDFLDLKGEG		0.770365	0.908712	0.136126	0.303453	0.652479	0.409584	NaN	1.22172	1.58188	1.28491	0.0462303	0.373486	1.94613	1.21011	NaN	NaN	S	2	___1		Hematological and neurological expressed 1 protein;Hematological and neurological expressed 1 protein| N-terminally processed					Phosphoserine							14-3-3 domain binding motif;Calmodulin-dependent protein kinase II substrate motif;Calmodulin-dependent protein kinase IV substrate motif;Casein kinase II substrate motif;Chk1 kinase substrate motif;G protein-coupled receptor kinase 1 substrate motif;GSK3 kinase substrate motif;PAK2 kinase substrate motif;PKA kinase substrate motif;PKC epsilon kinase substrate motif;PKC kinase substrate motif	0.999499	1.0754e-32	271.2	203.21	211.43	-2.0969	UID833
67	J3QKY4;J3QR53;Q96HE9	67;40;40	J3QKY4	J3QKY4	Proline-rich protein 11	PRR11	SHFQSKLITPPPPPPSPERVGISSIDISQSR		0.692324	0.871283	0.237683	0.415359	NaN	NaN	-2.42822	-2.22771	-1.0326	-1.71991	-2.13981	-0.722479	-2.86617	-2.63071	NaN	NaN	S	2	___1		Proline-rich protein 11		Poly-Pro			Phosphoserine							Casein kinase II substrate motif;Cdc2 kinase substrate motif;CDK kinase substrate motif;CDK1,2,4,6 kinase substrate motif;DNA dependent Protein kinase substrate motif;ERK1,2 kinase substrate motif;GSK-3, ERK1, ERK2, CDK5 substrate motif;WW domain binding motif	0.999901	0.0183663	55.314	44.942	55.314	2.7639	UID839
85	J3QQQ3;Q96NB3	85;351	J3QQQ3	J3QQQ3	Zinc finger protein 830	ZNF830	LTIKELQKKEEENADSDDEGELQDLLSQDWR		0.0659798	0.26298	-0.831551	-2.17651	-1.32628	NaN	-0.0992031	-1.56593	-0.571058	-1.83811	NaN	NaN	0.0465298	-0.36725	-0.161575	-0.511965	S	3	___1		Zinc finger protein 830					Phosphoserine							b-Adrenergic Receptor kinase substrate motif;BARD1 BRCT domain binding motif;Casein kinase II substrate motif	0.999999	2.66576e-05	94.259	79.555	94.259	0.23465	UID840
523	J3QQW9;Q15022	523;546	J3QQW9	J3QQW9	Polycomb protein SUZ12	SUZ12	CRPKRTKASMSEFLESEDGEVEQQRTYSSGH		0.270186	0.577159	0.226312	1.17489	0.167543	0.17713	-0.047554	0.162493	-0.0232372	0.639936	-0.2293	-0.105946	-0.13748	-0.383749	0.62184	NaN	S	2	___1	VEFS-Box	Polycomb protein SUZ12					Phosphoserine							b-Adrenergic Receptor kinase substrate motif;G protein-coupled receptor kinase 1 substrate motif	1	9.96279e-26	195.15	172.62	195.15	-1.9155	UID841	PLK1
308	J3QR07;Q96MU7	308;308	J3QR07	J3QR07	YTH domain-containing protein 1	YTHDC1	GSDEKKKERKRARGISPIVFDRSGSSASESY		0.620853	0.835425	-0.127752	-0.510392	3.03238	3.1173	2.79799	3.00651	2.68076	3.28123	3.85659	3.54621	2.99568	3.08595	3.02387	2.17439	S	2	___1		YTH domain-containing protein 1					Phosphoserine							14-3-3 domain binding motif;Akt kinase substrate motif;Calmodulin-dependent protein kinase II substrate motif;ERK1,2 kinase substrate motif;GSK-3, ERK1, ERK2, CDK5 substrate motif;MAPKAPK1 kinase substrate motif;PKA kinase substrate motif;PKC kinase substrate motif;WW domain binding motif	1	2.49348e-05	181.53	122.83	143.5	-0.51028	UID842
326	J3QR07;Q96MU7	326;326	J3QR07	J3QR07	YTH domain-containing protein 1	YTHDC1	VFDRSGSSASESYAGSEKKHEKLSSSVRAVR		0.659301	0.853008	-0.267907	-0.457761	-1.74328	-3.1503	-1.32365	-0.823437	-1.12683	-1.69219	NaN	NaN	-0.753422	-0.384291	-1.64248	-2.72131	S	2	___1		YTH domain-containing protein 1										In isoform 2.		G protein-coupled receptor kinase 1 substrate motif;MAPKAPK2 kinase substrate motif;PKA kinase substrate motif;PKC kinase substrate motif	0.999258	1.07348e-05	121.79	105.16	121.79	-1.2603	UID844
171	J3QRP6;O14745	171;290	J3QRP6	J3QRP6	Na(+)/H(+) exchange regulatory cofactor NHE-RF1	SLC9A3R1	EAALESPRPALVRSASSDTSEELNSQDSPPK		0.422067	0.720572	-0.146304	-0.837144	0.612635	0.530769	0.907026	0.821875	0.968214	1.08345	1.45293	1.08292	0.776997	1.13595	0.998749	0.354242	S	2	___1	EBP50_C	Na(+)/H(+) exchange regulatory cofactor NHE-RF1					Phosphoserine							14-3-3 domain binding motif;Calmodulin-dependent protein kinase II substrate motif;Calmodulin-dependent protein kinase IV substrate motif;Casein kinase II substrate motif;Chk1 kinase substrate motif;G protein-coupled receptor kinase 1 substrate motif;GSK3 kinase substrate motif;PKA kinase substrate motif;PKC kinase substrate motif	0.999862	4.05381e-139	428.3	398.32	404.57	0.89257	UID846
422	J3QSD7;Q9NYV4	422;423	J3QSD7	J3QSD7	Cyclin-dependent kinase 12	CDK12	AAAAAAKMDGKESKGSPVFLPRKENSSVEAK		0.00285396	0.0526923	-0.775099	-3.92267	-0.221285	-0.353149	-0.332352	-0.532791	-0.59613	-0.62261	0.895084	0.584385	0.22505	0.2547	0.486023	-0.452963	S	2	___1		Cyclin-dependent kinase 12					Phosphoserine							ERK1,2 kinase substrate motif;GSK-3, ERK1, ERK2, CDK5 substrate motif;PKA kinase substrate motif;PKC kinase substrate motif;WW domain binding motif	1	0.00168058	95.358	60.002	83.783	-0.017122	UID847
1082	J3QSD7;Q9NYV4	1082;1083	J3QSD7	J3QSD7	Cyclin-dependent kinase 12	CDK12	KETTSGTSTEPVKNSSPAPPQPAPGKVESGA		0.0340648	0.195348	-0.272628	-2.4533	2.34571	2.51783	2.41132	2.55052	2.35447	2.12711	2.76227	2.90891	2.66763	2.50752	2.8081	2.28831	S	2	___1		Cyclin-dependent kinase 12					Phosphoserine							ERK1,2 kinase substrate motif;G protein-coupled receptor kinase 1 substrate motif;GSK-3, ERK1, ERK2, CDK5 substrate motif;MDC1 BRCT domain binding motif;PKA kinase substrate motif;PKC kinase substrate motif;Plk1 PBD domain binding motif;WW domain binding motif	0.999999	3.6737e-26	262.48	234.84	235.81	-0.54877	UID850
249	J3QSD7;Q9NYV4	249;249	J3QSD7	J3QSD7	Cyclin-dependent kinase 12	CDK12	DDSPSGASYGQDYDLSPSRSHTSSNYDSYKK		0.014445	0.13824	-0.327384	-3.23034	NaN	NaN	-0.171036	-0.21265	-0.394768	-0.328835	0.09021	-0.134592	0.166136	0.263252	-0.132195	NaN	S	2	___1		Cyclin-dependent kinase 12					Phosphoserine							Casein kinase II substrate motif;Cdc2 kinase substrate motif;CDK kinase substrate motif;CDK1,2,4,6 kinase substrate motif;ERK1,2 kinase substrate motif;G protein-coupled receptor kinase 1 substrate motif;GSK3 kinase substrate motif;GSK-3, ERK1, ERK2, CDK5 substrate motif;WW domain binding motif	0.99411	5.07592e-36	217.82	196.29	200.99	0.35854	UID851
303	J3QSD7;Q9NYV4	303;303	J3QSD7	J3QSD7	Cyclin-dependent kinase 12	CDK12	STRSPSPYSRRQRSVSPYSRRRSSSYERSGS		0.715398	0.881434	0.150222	0.377811	-1.42797	-1.66241	-0.739845	-0.665079	NaN	-1.98496	-2.55683	NaN	-0.947741	-0.919024	-1.22399	-1.5838	S	2	___1		Cyclin-dependent kinase 12					Phosphoserine							14-3-3 domain binding motif;Akt kinase substrate motif;AMP-activated protein kinase 2 substrate motif;Calmodulin-dependent protein kinase II substrate motif;Casein kinase II substrate motif;ERK1,2 kinase substrate motif;GSK-3, ERK1, ERK2, CDK5 substrate motif;MAPKAPK1 kinase substrate motif;PKA kinase substrate motif;PKC kinase substrate motif;WW domain binding motif	0.999919	0.00380999	94.309	14.133	94.309	1.2516	UID852
426	J3QSV6;O76021	426;427	J3QSV6	J3QSV6	Ribosomal L1 domain-containing protein 1	RSL1D1	ASETPKAAESETPGKSPEKK___________		0.771842	0.909506	0.403691	0.297947	0.477583	0.424467	-1.94002	-1.73089	-4.73656	-5.17438	-1.24429	0.587765	-2.00899	-2.41143	-4.14386	-5.88114	S	2	___1		Ribosomal L1 domain-containing protein 1					Phosphoserine							Casein kinase II substrate motif;Cdc2 kinase substrate motif;CDK kinase substrate motif;CDK1,2,4,6 kinase substrate motif;ERK1,2 kinase substrate motif;Growth associated histone HI kinase substrate motif;GSK-3, ERK1, ERK2, CDK5 substrate motif;WW domain binding motif	1	2.38033e-14	225.09	147.44	225.09	0.1676	UID853
360	J3QSV6;O76021	360;361	J3QSV6	J3QSV6	Ribosomal L1 domain-containing protein 1	RSL1D1	KKRGRGKAQVKATNESEDEIPQLVPIGKKTP		0.0158477	0.1384	0.835971	2.89948	3.28157	3.11816	3.8384	3.50292	3.10192	4.06002	2.80308	2.30212	3.38439	1.75462	3.11386	2.52909	S	2	___1		Ribosomal L1 domain-containing protein 1					Phosphoserine							b-Adrenergic Receptor kinase substrate motif;BARD1 BRCT domain binding motif;Casein kinase II substrate motif;G protein-coupled receptor kinase 1 substrate motif	1	2.52762e-86	355.49	330.93	276.8	-0.24279	UID854
35	K7EIF1;K7EPF0;K7EQS3;K7EM48;K7EN63;Q96SI1	35;35;35;35;35;35	K7EIF1	K7EIF1	BTB/POZ domain-containing protein KCTD15	KCTD15	GTAEGGNMSRLSLTRSPVSPLAAQGIPLPAQ		0.0167072	0.137958	-0.466874	-3.01417	-2.52118	-2.55289	-2.26692	-2.42746	-2.28706	-2.09716	-1.62834	NaN	-1.94694	-2.3245	-1.66784	NaN	S	2	___1		BTB/POZ domain-containing protein KCTD15					Phosphoserine							Casein kinase II substrate motif;ERK1,2 kinase substrate motif;G protein-coupled receptor kinase 1 substrate motif;Growth associated histone HI kinase substrate motif;GSK-3, ERK1, ERK2, CDK5 substrate motif;MAPKAPK2 kinase substrate motif;WW domain binding motif	0.89574	0.0200025	42.338	36.105	42.338	0.55333	UID857
40	K7EJ05;K7EQ84;K7EPP9;K7ELY2;X6R2W0;K7EIY4;Q5U8S2;O60499	40;20;40;103;134;119;134;134	K7EJ05	K7EJ05	Syntaxin-10	STX10	NREILAGKPAAQKSPSDLLDASAVSATSRYI		0.448367	0.737874	0.644807	0.803018	NaN	NaN	0.259512	0.852077	0.670605	0.83539	-2.69688	NaN	0.832079	1.03688	0.872728	0.00313187	S	2	___1		Syntaxin-10					Phosphoserine						Cytoplasmic	DNA dependent Protein kinase substrate motif;PKA kinase substrate motif;PKC kinase substrate motif	0.999989	6.94576e-64	334.46	305.65	334.46	-0.63255	UID858
12	K7EQ06;K7EJP7	12;12	K7EQ06	K7EQ06		HDGFRP2	____MAVTAVTATAASDRMESDSDSDKS___		0.735955	0.891762	0.0799888	0.347842	-0.50667	-0.524912	-1.08165	-0.755228	-0.525639	-0.576698	-0.0932636	-0.351179	-1.24224	-1.20565	-0.816612	NaN	S	2	___1														PKA kinase substrate motif;PKC kinase substrate motif	0.991784	2.38392e-11	168.5	144.15	155.43	2.0475	UID860
18	K7EQS5;K7EQS9;K7EPK6;K7EK08;O43310	18;18;18;18;18	K7EQS5	K7EQS5	CBP80/20-dependent translation initiation factor	CTIF	NSSAASASSEAGSSRSQEIEELERFIDSYVL		0.107102	0.352116	0.253704	1.8148	-1.94215	-2.28566	-1.63904	-1.70341	NaN	-1.76255	-1.89519	-2.18605	-2.31753	-1.98796	-2.2146	NaN	S	2	___1		CBP80/20-dependent translation initiation factor					Phosphoserine		Interaction with NCBP1/CBP80					ATM kinase substrate motif;Casein kinase II substrate motif;DNA dependent Protein kinase substrate motif	1	0.00951055	63.283	44.538	63.283	0.91123	UID861
123	K7ENR9;K7ERZ5;P49916	123;219;210	K7ENR9	K7ENR9	DNA ligase 3	LIG3	KAVVQAKLTTTGQVTSPVKGASFVTSTNPRK		0.523757	0.790585	-0.129151	-0.660661	2.32672	2.58043	2.05338	2.38879	2.43407	2.74541	3.22403	2.851	2.21511	2.21629	2.56641	2.23084	S	2	___1		DNA ligase 3					Phosphoserine							Cdc2 kinase substrate motif;CDK kinase substrate motif;CDK1,2,4,6 kinase substrate motif;ERK1,2 kinase substrate motif;Growth associated histone HI kinase substrate motif;GSK-3, ERK1, ERK2, CDK5 substrate motif;WW domain binding motif	0.952003	3.15253e-22	276.32	207.76	199.13	-1.4875	UID863	CDK1;CDK2
625	K7EPS6;A0A087WX58;Q7Z4V5	139;54;625	K7EPS6;Q7Z4V5	Q7Z4V5	Hepatoma-derived growth factor-related protein 2	HDGFRP2	KGESAEDKEHEEGRDSEEGPRCGSSEDLHDS		0.81939	0.931058	-0.0941165	-0.234418	0.631287	1.78301	1.21751	-0.125286	2.13429	1.3162	0.657505	0.74288	1.3471	1.11614	2.1705	1.48758	S	3	___1		Hepatoma-derived growth factor-related protein 2												b-Adrenergic Receptor kinase substrate motif;Casein kinase II substrate motif;G protein-coupled receptor kinase 1 substrate motif;PKA kinase substrate motif;PKC kinase substrate motif	1	1.44584e-51	276.23	253.06	276.23	-0.97774	UID864
45	K7EQ91;Q13433	45;478	K7EQ91	K7EQ91	Zinc transporter ZIP6	SLC39A6	DVEIKKQLSKYESQLSTNEEKVDTDDRTEGY		0.889457	0.959928	-0.0333568	-0.143484	NaN	NaN	0.815722	1.17921	0.561897	0.563284	1.15882	0.757519	0.905354	0.995707	1.01073	0.052187	S	2	___1	Zip	Zinc transporter ZIP6	+										Cytoplasmic	Casein kinase II substrate motif	0.996217	1.31833e-21	240.65	211.94	231.67	0.22437	UID865
223	K7EQI9;Q86VR2	223;320	K7EQI9	K7EQI9	Protein FAM134C	FAM134C	GQTPLTEGSEDLDGHSDPEESFARDLPDFPS		0.158323	0.422928	-0.260035	-1.52467	2.34007	2.24438	2.02565	2.03174	2.23915	2.20442	2.60291	2.82426	2.4227	2.73983	2.33539	1.72053	S	3	___1		Protein FAM134C					Phosphoserine							Casein kinase I substrate motif;Casein kinase II substrate motif	0.999614	5.8298e-11	149.52	130.31	129.03	0.33729	UID867
110	K7ERV4;Q8N2U9	110;110	K7ERV4	K7ERV4	PQ-loop repeat-containing protein 1	PQLC1	CTEVRVANELNARRRSFTAADSKDEEVKVAP		0.668198	0.854231	0.130146	0.443035	-1.86339	-1.75922	-1.41586	-0.688915	-0.579723	-0.640558	-1.5604	NaN	-1.52645	-0.944071	-0.973225	-1.4363	S	2	___1		PQ-loop repeat-containing protein 1												14-3-3 domain binding motif;Calmodulin-dependent protein kinase II substrate motif;Casein kinase II substrate motif;G protein-coupled receptor kinase 1 substrate motif;MAPKAPK2 kinase substrate motif;PAK2 kinase substrate motif;PKA kinase substrate motif;PKC epsilon kinase substrate motif;PKC kinase substrate motif	0.946091	0.000934271	106.17	71.168	99.941	0.078971	UID868
284	M0QZ28;Q9Y4J8;M0R0C4	284;662;88	M0QZ28	M0QZ28	Dystrobrevin alpha	DTNA	VDSEFARTQFEDLVPSPTSEKAFLAQIHARK		0.149761	0.412185	1.17787	1.6177	0.782549	NaN	-0.355751	0.0137424	0.189087	0.271517	-3.37462	NaN	-0.310131	-0.0798397	-0.225958	NaN	S	2	___1		Dystrobrevin alpha										In isoform 3| isoform 4| isoform 5| isoform 8| isoform 12| isoform 16.;In isoform 7| isoform 9.		Casein kinase II substrate motif;DNA dependent Protein kinase substrate motif;ERK1,2 kinase substrate motif;GSK-3, ERK1, ERK2, CDK5 substrate motif;WW domain binding motif	0.90328	1.0268e-12	182.57	146.68	181.58	-0.1767	UID871
1290	M0R300;M0R0P8;Q13459	1290;1290;1290	M0R300	M0R300	Unconventional myosin-IXb	MYO9B	KSKPCGSPRVQEKPDSPGGSTQIQRYLDAER		0.799151	0.920048	0.0529785	0.262091	-0.788952	-0.904558	-1.64227	-1.3356	-0.802547	-1.07521	-1.44252	-0.79792	-1.21617	-1.46113	-0.804773	NaN	S	3	___1		Unconventional myosin-IXb					Phosphoserine		Tail					b-Adrenergic Receptor kinase substrate motif;ERK1,2 kinase substrate motif;G protein-coupled receptor kinase 1 substrate motif;GSK3 kinase substrate motif;GSK-3, ERK1, ERK2, CDK5 substrate motif;PKA kinase substrate motif;PKC kinase substrate motif;WW domain binding motif	0.99353	0.0205098	54.117	44.702	51.888	0.32213	UID872
71	M0R117;Q02543;M0R3D6;M0R1A7;M0R0P7	71;71;42;42;32	M0R117	M0R117	60S ribosomal protein L18a	RPL18A	KSSGEIVYCGQVFEKSPLRVKNFGIWLRYDS		0.56487	0.81282	0.199486	0.5953	-1.94976	-1.49679	-1.18434	-1.5689	-0.247915	-0.697515	-1.41452	-2.03563	-1.33577	-1.09044	-0.575506	-1.89026	S	3	___1	Ribosomal_L18ae	60S ribosomal protein L18a					Phosphoserine							Cdc2 kinase substrate motif;CDK kinase substrate motif;CDK1,2,4,6 kinase substrate motif;ERK1,2 kinase substrate motif;Growth associated histone HI kinase substrate motif;GSK-3, ERK1, ERK2, CDK5 substrate motif;WW domain binding motif	1	4.07643e-13	160.2	145.28	160.2	-0.37122	UID876
255	M0R165;Q9UBC2;M0R2S2	255;255;101	M0R165	M0R165	Epidermal growth factor receptor substrate 15-like 1	EPS15L1	PSHGSVSSLNSTGSLSPKHSLKQTQPTVNWV		0.501712	0.776268	0.139518	0.703484	0.23119	NaN	-0.403582	-0.285995	0.112452	0.148273	NaN	0	-0.17849	-0.0132523	0.0620747	-0.765583	S	2	___1		Epidermal growth factor receptor substrate 15-like 1					Phosphoserine		Interaction with DAB2					ERK1,2 kinase substrate motif;G protein-coupled receptor kinase 1 substrate motif;Growth associated histone HI kinase substrate motif;GSK3 kinase substrate motif;GSK-3, ERK1, ERK2, CDK5 substrate motif;PKA kinase substrate motif;PKC kinase substrate motif;WW domain binding motif	0.995504	7.39743e-13	153.21	120.28	153.21	0.041565	UID877
229	M0R165;Q9UBC2;M0R2S2	229;229;75	M0R165	M0R165	Epidermal growth factor receptor substrate 15-like 1	EPS15L1	RKKTVFPGAVPVLPASPPPKDSLRSTPSHGS		0.86494	0.950214	0.0325915	0.174519	-1.12974	-1.04346	-1.12781	-1.04203	-0.658356	-0.602175	-0.610628	-0.822765	-1.37309	-0.978743	-0.535456	-1.47844	S	2	___1		Epidermal growth factor receptor substrate 15-like 1					Phosphoserine		Interaction with DAB2					ERK1,2 kinase substrate motif;GSK-3, ERK1, ERK2, CDK5 substrate motif;WW domain binding motif	1	3.64762e-06	112.5	93.755	112.5	0.62037	UID878
65	O00116;B8ZZ81	65;65	O00116	O00116	Alkyldihydroxyacetonephosphate synthase, peroxisomal	AGPS	REALSTNECKARRAASAATAAPTATPAAQES		0.275371	0.580107	0.250014	1.15391	0.216541	0.332176	-0.14855	0.039238	0.293835	0.579041	0.514297	0.220039	-0.246656	-0.481953	0.390064	-0.583595	S	2	___1		Alkyldihydroxyacetonephosphate synthase| peroxisomal					Phosphoserine							14-3-3 domain binding motif;Calmodulin-dependent protein kinase II substrate motif;Casein kinase II substrate motif;G protein-coupled receptor kinase 1 substrate motif;PKA kinase substrate motif;PKC kinase substrate motif;ZIP kinase substrate motif	0.999959	1.853e-19	174.2	151.99	174.2	1.7561	UID879
276	O00203	276	O00203	O00203	AP-3 complex subunit beta-1	AP3B1	KEGDELEDNGKNFYESDDDQKEKTDKKKKPY		0.120806	0.376702	0.407302	1.69567	0.260406	0.339329	1.17875	1.2926	1.2678	1.49073	0.298141	0.300962	0.770954	0.622643	0.921137	0.471962	S	2	___1	Adaptin_N	AP-3 complex subunit beta-1					Phosphoserine							b-Adrenergic Receptor kinase substrate motif;Casein kinase II substrate motif;Pyruvate dehydrogenase kinase substrate motif	1	1.53115e-20	261.61	213.38	259.72	0.5517	UID880
415	O00257	415	O00257	O00257	E3 SUMO-protein ligase CBX4	CBX4	HAVGLNLSHVRKRCLSETHGEREPCKKRLTA		0.310428	0.617084	-0.298398	-1.06846	-0.448469	-0.578064	-1.74526	-1.03025	-0.514458	-0.431097	-0.0760765	0.00185394	-1.08377	-0.710375	-0.241831	-0.84701	S	2	___1		E3 SUMO-protein ligase CBX4							Interaction with BMI1					14-3-3 domain binding motif;Akt kinase substrate motif;Calmodulin-dependent protein kinase II substrate motif;Casein kinase II substrate motif;G protein-coupled receptor kinase 1 substrate motif;MAPKAPK1 kinase substrate motif;PKA kinase substrate motif;PKC kinase substrate motif	0.999997	8.1027e-05	168.46	150.02	168.46	-0.3048	UID881
181	O00264	181	O00264	O00264	Membrane-associated progesterone receptor component 1	PGRMC1	HVGKLLKEGEEPTVYSDEEEPKDESARKND_		0.551319	0.806054	0.151948	0.616534	3.19198	3.33364	3.4398	3.65044	3.39918	3.64939	2.48786	3.6564	3.56025	3.53017	3.87116	2.64691	S	2	___1		Membrane-associated progesterone receptor component 1					Phosphoserine						Cytoplasmic	BARD1 BRCT domain binding motif;Casein kinase II substrate motif	1	4.44295e-113	392.87	351.91	392.87	-2.8411	UID882
57	O00264	57	O00264	O00264	Membrane-associated progesterone receptor component 1	PGRMC1	LYKIVRGDQPAASGDSDDDEPPPLPRLKRRD		0.507115	0.777494	-0.847375	-0.687971	4.69746	-2.21692	4.76685	5.0077	4.82215	4.95326	2.83392	4.76524	4.73702	5.43342	4.63104	4.71411	S	2	___1		Membrane-associated progesterone receptor component 1					Phosphoserine						Cytoplasmic	b-Adrenergic Receptor kinase substrate motif;Casein kinase II substrate motif;Pyruvate dehydrogenase kinase substrate motif	0.999998	1.08905e-51	277.22	257.4	217.33	-3.8525	UID883
60	O00505	60	O00505	O00505	Importin subunit alpha-4	KPNA3	LLKKRNVPQEESLEDSDVDADFKAQNVTLEA		0.0825594	0.305093	1.16473	1.95306	1.2129	1.29507	1.71734	1.76165	1.42034	1.76526	-2.13049	0.355175	1.46149	1.03339	1.10057	NaN	S	2	___1	IBB	Importin subunit alpha-4					Phosphoserine							b-Adrenergic Receptor kinase substrate motif;Casein kinase II substrate motif;G protein-coupled receptor kinase 1 substrate motif;MAPKAPK2 kinase substrate motif;Pyruvate dehydrogenase kinase substrate motif	1	1.40122e-34	240.61	209.65	240.61	-0.83586	UID885
687	O00512	687	O00512	O00512	B-cell CLL/lymphoma 9 protein	BCL9	GNNPIFPRIPVEGPLSPSRGDFPKGIPPQMG		0.145561	0.409025	-0.40158	-1.59328	-0.326139	-0.290739	-0.540195	-0.504086	-0.253733	-0.026289	0.941179	0.365728	-0.301477	-0.548656	-0.0665226	NaN	S	2	___1		B-cell CLL/lymphoma 9 protein		Pro-rich			Phosphoserine							Casein kinase II substrate motif;Cdc2 kinase substrate motif;CDK kinase substrate motif;CDK1,2,4,6 kinase substrate motif;CDK4 kinase substrate motif;ERK1,2 kinase substrate motif;GSK-3, ERK1, ERK2, CDK5 substrate motif;WW domain binding motif	0.95777	0.000220773	107.93	76.853	99.844	4.7515	UID886
520	O00567	520	O00567	O00567	Nucleolar protein 56	NOP56	KPKKKKSFSKEELMSSDLEETAGSTSIPKRK		0.0607384	0.256298	0.580271	2.11297	2.29448	1.95325	2.46253	2.40491	2.24013	3.03385	1.58285	1.60944	2.49269	0.970871	2.40819	1.84349	S	2	___1		Nucleolar protein 56		Lys-rich			Phosphoserine							Casein kinase II substrate motif;MDC1 BRCT domain binding motif;Plk1 PBD domain binding motif	0.997746	1.48101e-42	263.47	235.8	227.4	-0.078785	UID888
570	O00567	570	O00567	O00567	Nucleolar protein 56	NOP56	GSKKKRKFSKEEPVSSGPEEAVGKSSSKKKK		0.148622	0.41127	0.468892	1.56512	1.03021	0.872292	0.937027	0.756397	0.412983	1.52608	1.2441	0.556343	0.707436	-0.695162	0.39435	0.514572	S	2	___1		Nucleolar protein 56		Lys-rich			Phosphoserine							Casein kinase II substrate motif;MDC1 BRCT domain binding motif;Plk1 PBD domain binding motif	1	1.50919e-14	214.23	188.68	121.24	0.63813	UID890
696	O14497;H0Y488;A0A1B0GTU5;A0A087WUV6	696;313;315;313	O14497	O14497	AT-rich interactive domain-containing protein 1A	ARID1A	FSPHTSPHLPGIRGPSPSPVGSPASVAQSRS		0.0274034	0.16696	-0.610882	-2.77733	NaN	NaN	-1.3078	-1.06205	-0.960138	-0.67885	0.171341	-0.193937	-0.668497	-0.644995	-0.620548	NaN	S	2	___1		AT-rich interactive domain-containing protein 1A					Phosphoserine							14-3-3 domain binding motif;AMP-activated protein kinase substrate motif;Calmodulin-dependent protein kinase II substrate motif;Casein kinase II substrate motif;DNA dependent Protein kinase substrate motif;ERK1,2 kinase substrate motif;GSK-3, ERK1, ERK2, CDK5 substrate motif;HMGCoA Reductase kinase substrate motif;PKA kinase substrate motif;PKC kinase substrate motif;WW domain binding motif	0.999285	1.2041e-13	166.92	154.34	166.92	2.5969	UID892
363	O14497	363	O14497	O14497	AT-rich interactive domain-containing protein 1A	ARID1A	AASGGAQQRSHHAPMSPGSSGGGGQPLARTP		0.123757	0.378858	-1.0582	-1.74909	-0.782043	-0.952114	-2.94412	NaN	-1.8792	NaN	0.430342	-0.544004	-0.711121	-1.83522	-0.245829	NaN	S	3	___1		AT-rich interactive domain-containing protein 1A					Phosphoserine					In isoform 3.		Casein kinase II substrate motif;ERK1,2 kinase substrate motif;G protein-coupled receptor kinase 1 substrate motif;GSK3 kinase substrate motif;GSK-3, ERK1, ERK2, CDK5 substrate motif;WW domain binding motif	0.999993	6.7717e-13	152.48	134.78	152.48	-0.38789	UID893	CDK2
1755	O14497;H0Y488;A0A1B0GTU5	1755;1371;1373	O14497	O14497	AT-rich interactive domain-containing protein 1A	ARID1A	GQRTLLDPGRFSKVSSPAPMEGGEEEEELLG		0.271543	0.576559	-0.266883	-1.18094	NaN	-0.547607	-1.02559	-0.970129	-0.781458	-0.523891	-0.179272	-0.559513	-0.6488	-1.14186	0.0151844	NaN	S	2	___1		AT-rich interactive domain-containing protein 1A												Calmodulin-dependent protein kinase II substrate motif;ERK1,2 kinase substrate motif;GSK-3, ERK1, ERK2, CDK5 substrate motif;MAPKAPK2 kinase substrate motif;MDC1 BRCT domain binding motif;PKA kinase substrate motif;PKC kinase substrate motif;Plk1 PBD domain binding motif;WW domain binding motif	0.885205	9.85745e-06	106.16	85.492	106.16	1.588	UID894
415	O14545	415	O14545	O14545	TRAF-type zinc finger domain-containing protein 1	TRAFD1	VTEGIPRLDSQPQETSPELPRRRVRHQGDLS		0.613647	0.832595	0.117311	0.52109	-0.089016	-0.0477295	0.101362	0.57753	0.63077	0.831991	0.65481	0.0572529	0.451431	0.516726	-0.0257664	-0.353411	S	2	___1		TRAF-type zinc finger domain-containing protein 1					Phosphoserine					In isoform 2.		Casein kinase II substrate motif;ERK1,2 kinase substrate motif;G protein-coupled receptor kinase 1 substrate motif;GSK-3, ERK1, ERK2, CDK5 substrate motif;WW domain binding motif	0.999144	5.66338e-21	240.46	201.9	240.46	0.11069	UID896
1107	O14654	1107	O14654	O14654	Insulin receptor substrate 4	IRS4	FFAAARAAVSAFPTDSLERDLSPSSAPAVAS		0.649356	0.846607	0.113572	0.470261	0.56432	0.544914	1.07357	1.11061	1.48211	1.52806	0.995443	NaN	0.91293	0.981066	1.40389	0.391798	S	2	___1		Insulin receptor substrate 4		Ala-rich										b-Adrenergic Receptor kinase substrate motif;Casein kinase II substrate motif	0.999177	3.05249e-13	212.17	169.32	188.4	-0.44988	UID898
775	O14654	775	O14654	O14654	Insulin receptor substrate 4	IRS4	KAPDTNKEDDSKDNDSESDYMFMAPGAGAIP		0.423826	0.721548	0.234394	0.858018	NaN	NaN	-0.191767	-0.839966	-0.681894	-0.87159	NaN	-1.36006	-0.742422	-1.09246	-0.327845	NaN	S	2	___1		Insulin receptor substrate 4							CRK-binding					b-Adrenergic Receptor kinase substrate motif;Casein kinase I substrate motif;Casein kinase II substrate motif;G protein-coupled receptor kinase 1 substrate motif;PKA kinase substrate motif;Pyruvate dehydrogenase kinase substrate motif	0.976778	2.4968e-10	138.55	116.99	138.55	-3.6114	UID899
427	O14654	427	O14654	O14654	Insulin receptor substrate 4	IRS4	GRLHLPRGRRSRRAVSVPASFFRRLAPSPAR		0.741227	0.892285	-0.0840804	-0.339539	0.86688	0.758255	0.188292	0.765448	0.794809	1.03469	1.23595	1.02888	0.601013	0.814941	1.35111	-0.119038	S	2	___1		Insulin receptor substrate 4												14-3-3 domain binding motif;Calmodulin-dependent protein kinase II substrate motif;G protein-coupled receptor kinase 1 substrate motif;GSK3 kinase substrate motif;Phosphorylase kinase substrate motif;PKA kinase substrate motif;PKC kinase substrate motif;ZIP kinase substrate motif	1	1.51206e-05	157.78	124.59	152.07	-0.25182	UID900
251	O14654	251	O14654	O14654	Insulin receptor substrate 4	IRS4	QVIVKPRGLGHRKELSGVFRLCLTDEEVVFV		0.134222	0.390636	0.505672	1.73072	NaN	NaN	-2.01684	-1.70104	-1.32532	-1.21689	NaN	NaN	-1.76869	-2.1482	-1.6826	-2.68329	S	2	___1	IRS	Insulin receptor substrate 4				IRS-type PTB								PKA kinase substrate motif;PKC kinase substrate motif	1	0.00371791	98.044	60.853	98.044	1.1563	UID901
439	O14654	439	O14654	O14654	Insulin receptor substrate 4	IRS4	RAVSVPASFFRRLAPSPARPRHPAEAPNNGA		0.227612	0.51935	-0.245854	-1.28543	1.33363	1.0686	1.47387	1.58836	1.78508	1.09024	1.78993	2.02759	1.20809	1.36528	2.06814	1.35589	S	2	___1		Insulin receptor substrate 4												Cdc2 kinase substrate motif;CDK kinase substrate motif;CDK1,2,4,6 kinase substrate motif;DNA dependent Protein kinase substrate motif;ERK1,2 kinase substrate motif;G protein-coupled receptor kinase 1 substrate motif;GSK-3, ERK1, ERK2, CDK5 substrate motif;WW domain binding motif	1	0.00017471	112.13	60.684	96.113	1.4137	UID902
66	O14654	66	O14654	O14654	Insulin receptor substrate 4	IRS4	PGAMWLSTATGSRSDSESEEEDLPVGEEVCK		0.662209	0.852803	0.169477	0.459271	NaN	NaN	0.0112514	0.0793457	-0.175402	-0.206497	NaN	-1.23949	0.33902	0.245499	-0.31424	NaN	S	2	___1		Insulin receptor substrate 4												14-3-3 domain binding motif;b-Adrenergic Receptor kinase substrate motif;Calmodulin-dependent protein kinase II substrate motif;Casein kinase II substrate motif;G protein-coupled receptor kinase 1 substrate motif;MAPKAPK2 kinase substrate motif;PKA kinase substrate motif;PKC kinase substrate motif	0.99877	6.34529e-51	302.32	278.95	172.24	0.6001	UID904
1091	O14654	1091	O14654	O14654	Insulin receptor substrate 4	IRS4	QEEEQERRRPQSRSQSFFAAARAAVSAFPTD		0.233182	0.530247	-0.297607	-1.269	-0.126501	-0.547125	-0.69701	-0.662466	0.114944	0.109701	0.429184	0.0999641	-0.710566	-0.0154018	0.415205	-0.241198	S	2	___1		Insulin receptor substrate 4												14-3-3 domain binding motif;Calmodulin-dependent protein kinase II substrate motif;G protein-coupled receptor kinase 1 substrate motif;MAPKAPK2 kinase substrate motif;PKA kinase substrate motif;PKC kinase substrate motif	1	2.54154e-05	191.54	127.12	144.17	-0.39162	UID905
751	O14654	751	O14654	O14654	Insulin receptor substrate 4	IRS4	PFEDSRGYMMMFPRVSPPPAPSPPKAPDTNK		0.382386	0.687188	-0.184523	-0.918354	0.621502	0.84351	0.246586	0.500458	0.883966	0.98333	1.32302	1.23597	NaN	0.697653	0.606474	0.458963	S	2	___1		Insulin receptor substrate 4							CRK-binding					ERK1,2 kinase substrate motif;G protein-coupled receptor kinase 1 substrate motif;GSK-3, ERK1, ERK2, CDK5 substrate motif;PKA kinase substrate motif;PKC kinase substrate motif;WW domain binding motif	0.999995	0.000161481	113.22	95.416	99.752	0.84336	UID906
4738	O14686	4738	O14686	O14686	Histone-lysine N-methyltransferase 2D	KMT2D	PHLGSGRWEQEDRALSPVIPLIPRASIPVFP		0.14672	0.40956	-0.408636	-1.57332	-1.63852	-1.45271	-1.40114	-1.67763	-1.37201	-0.978973	-0.428009	-0.827808	-1.14776	-1.19884	-0.46361	-2.00314	S	2	___1		Histone-lysine N-methyltransferase 2D					Phosphoserine							14-3-3 domain binding motif;Calmodulin-dependent protein kinase II substrate motif;ERK1,2 kinase substrate motif;G protein-coupled receptor kinase 1 substrate motif;GSK-3, ERK1, ERK2, CDK5 substrate motif;PKA kinase substrate motif;PKC kinase substrate motif;WW domain binding motif	1	0.00130263	96.229	89.009	82.171	-0.22474	UID907
2274	O14686	2274	O14686	O14686	Histone-lysine N-methyltransferase 2D	KMT2D	ESPGVGGGKASEPLLSPPPFGESRKALEVKK		0.212396	0.500329	-0.279791	-1.33208	-1.49813	-1.16367	-1.73266	-1.6875	-1.62574	-1.10404	-0.932737	-0.647585	-1.32937	-1.41813	-0.937729	-1.86744	S	2	___1		Histone-lysine N-methyltransferase 2D		Pro-rich			Phosphoserine							ERK1,2 kinase substrate motif;GSK-3, ERK1, ERK2, CDK5 substrate motif;WW domain binding motif	0.9992	0.00339387	71.98	51.027	71.98	0.81505	UID908
1671	O14686	1671	O14686	O14686	Histone-lysine N-methyltransferase 2D	KMT2D	GVEHMECEIKLEGPVSPDVEPGKEETEESKK		0.0823386	0.30493	-0.306016	-2.02649	-0.267149	-0.435524	-0.936022	-0.708151	-0.620674	NaN	-0.526072	-0.26034	NaN	-0.259371	-0.104168	NaN	S	3	___1		Histone-lysine N-methyltransferase 2D					Phosphoserine							ERK1,2 kinase substrate motif;GSK-3, ERK1, ERK2, CDK5 substrate motif;WW domain binding motif	0.999926	0.000694759	67.655	47.005	67.655	0.90618	UID909
4359	O14686	4359	O14686	O14686	Histone-lysine N-methyltransferase 2D	KMT2D	PKPQGPTLEPPPGRVSPAAAQLADTLFSKGL		0.0163559	0.137514	-0.47508	-2.88106	-0.609837	-0.653425	-0.524822	-0.611259	-0.518858	-0.0556259	0.455147	0.244164	-0.174915	-0.383364	0.0830803	-0.347458	S	2	___1		Histone-lysine N-methyltransferase 2D		Pro-rich			Phosphoserine							ERK1,2 kinase substrate motif;G protein-coupled receptor kinase 1 substrate motif;GSK-3, ERK1, ERK2, CDK5 substrate motif;PKA kinase substrate motif;PKC kinase substrate motif;WW domain binding motif	1	9.66087e-13	159.69	138.63	159.69	-2.3618	UID910
32	O14828	32	O14828	O14828	Secretory carrier-associated membrane protein 3	SCAMP3	LDNPFQDPAVIQHRPSRQYATLDVYNPFETR		0.540598	0.806051	-0.523915	-0.643176	-1.91988	-1.36517	-1.8953	-3.86234	0.0189667	NaN	0.00907326	-1.31223	-2.12284	-1.69733	NaN	NaN	S	3	___1		Secretory carrier-associated membrane protein 3					Phosphoserine					In isoform 2.	Cytoplasmic	Casein kinase II substrate motif;DNA dependent Protein kinase substrate motif;G protein-coupled receptor kinase 1 substrate motif;PKA kinase substrate motif;PKC kinase substrate motif	0.850309	3.81591e-05	70.666	58.059	70.666	0.68348	UID911
76	O14828	76	O14828	O14828	Secretory carrier-associated membrane protein 3	SCAMP3	LPPPSAPSLQPSRKLSPTEPKNYGSYSTQAS		0.200108	0.482384	1.106	1.39644	1.22441	1.33586	-0.3106	-0.211729	-0.529161	NaN	0.165325	1.31471	-2.29932	-2.02586	-1.17606	NaN	S	2	___1		Secretory carrier-associated membrane protein 3					Phosphoserine						Cytoplasmic	14-3-3 domain binding motif;Calmodulin-dependent protein kinase II substrate motif;Casein kinase II substrate motif;ERK1,2 kinase substrate motif;G protein-coupled receptor kinase 1 substrate motif;GSK-3, ERK1, ERK2, CDK5 substrate motif;MAPKAPK2 kinase substrate motif;PKA kinase substrate motif;PKC epsilon kinase substrate motif;PKC kinase substrate motif;WW domain binding motif	0.999984	0.000399781	160.98	94.447	160.98	1.2395	UID912
811	O15164	811	O15164	O15164	Transcription intermediary factor 1-alpha	TRIM24	NSSNGKSEWLDPSQKSPLHVGETRKEDDPNE		0.321069	0.625629	-0.402884	-1.06775	-1.04798	NaN	-1.21966	-0.947918	NaN	-0.954704	0.246399	-0.109678	-1.59814	-1.06497	-0.672003	NaN	S	2	___1		Transcription intermediary factor 1-alpha					Phosphoserine							ERK1,2 kinase substrate motif;Growth associated histone HI kinase substrate motif;GSK-3, ERK1, ERK2, CDK5 substrate motif;WW domain binding motif	0.99998	2.69697e-05	101.29	81.31	51.252	-1.1677	UID922
90	O15173	90	O15173	O15173	Membrane-associated progesterone receptor component 2	PGRMC2	WGRRGLGAGAGAGEESPATSLPRMKKRDFSL		0.186231	0.462959	0.225725	1.43097	1.68234	1.38671	1.32552	1.30499	1.05422	1.46125	1.53257	1.3817	0.751266	1.09306	0.958637	NaN	S	2	___1		Membrane-associated progesterone receptor component 2					Phosphoserine							b-Adrenergic Receptor kinase substrate motif;Casein kinase II substrate motif;ERK1,2 kinase substrate motif;G protein-coupled receptor kinase 1 substrate motif;GSK3 kinase substrate motif;GSK-3, ERK1, ERK2, CDK5 substrate motif;WW domain binding motif	0.999771	7.71213e-52	297.63	262.91	205.88	0.4522	UID923
148	O15234;J3KSY7	148;35	O15234	O15234	Protein CASC3	CASC3	EEKPDTKSTVTGERQSGDGQESTEPVENKVG		0.663663	0.852383	0.0804586	0.449554	-0.205681	NaN	-0.131407	-0.423208	-0.0207119	-0.153728	-0.82276	-0.129034	-0.0468521	0.0909538	-0.0479546	-0.648788	S	2	___1	Btz	Protein CASC3					Phosphoserine		Necessary for RNA-binding| interaction with MAGOH and localization in nucleus speckles;Sufficient to form the EJC					Casein kinase I substrate motif;PKA kinase substrate motif;PKC kinase substrate motif	1	2.52288e-52	325.77	277.86	325.77	1.4441	UID926
129	O15400	129	O15400	O15400	Syntaxin-7	STX7	REKEFVARVRASSRVSGSFPEDSSKERNLVS		0.389086	0.695619	0.124134	0.900381	0.208324	-0.0950584	0.461744	0.253153	0.320099	0.62063	0.165789	0.0841751	0.339378	0.516064	0.0813408	-0.162659	S	2	___1		Syntaxin-7					Phosphoserine						Cytoplasmic	Casein kinase II substrate motif;G protein-coupled receptor kinase 1 substrate motif;MAPKAPK2 kinase substrate motif;PKA kinase substrate motif;PKC kinase substrate motif	0.995554	0.000229291	107.17	60.322	78.763	2.6365	UID928
285	O15446	285	O15446	O15446	DNA-directed RNA polymerase I subunit RPA34	CD3EAP	KQEQINTEPLEDTVLSPTKKRKRQKGTEGME		0.0078903	0.0936087	-0.614667	-3.39864	0.41711	NaN	0.482731	0.284794	0.354589	0.738018	1.40863	1.42072	0.918707	0.738291	1.3478	0.58654	S	2	___1	RNA_polI_A34	DNA-directed RNA polymerase I subunit RPA34					Phosphoserine							Casein kinase II substrate motif;Cdc2 kinase substrate motif;CDK kinase substrate motif;CDK1,2,4,6 kinase substrate motif;ERK1,2 kinase substrate motif;GSK-3, ERK1, ERK2, CDK5 substrate motif;WW domain binding motif	0.835794	4.46141e-61	321.68	284.02	283.49	0.76647	UID929	CDK1
448	O43290	448	O43290	O43290	U4/U6.U5 tri-snRNP-associated protein 1	SART1	GDFGSRLRGRGRRRVSEVEEEKEPVPQPLPS		0.833754	0.936746	-0.0639518	-0.215441	3.52498	3.47476	2.27814	2.49329	2.79944	2.83197	3.72441	3.31417	2.89255	2.70115	2.95189	2.20213	S	3	___1	SART-1	U4/U6.U5 tri-snRNP-associated protein 1					Phosphoserine							14-3-3 domain binding motif;Calmodulin-dependent protein kinase II substrate motif;Casein kinase II substrate motif;G protein-coupled receptor kinase 1 substrate motif;MAPKAPK1 kinase substrate motif;PAK2 kinase substrate motif;Pim1 kinase substrate sequence;PKA kinase substrate motif;PKC epsilon kinase substrate motif;PKC kinase substrate motif;ZIP kinase substrate motif	1	1.1331e-19	187.29	169.94	187.29	-0.19963	UID931
93	Q9UG54;O43318	93;439	Q9UG54	Q9UG54	Mitogen-activated protein kinase kinase kinase 7	DKFZp586F0420;MAP3K7	ARIAATTGNGQPRRRSIQDLTVTGTEPGQVS		0.314574	0.621308	0.205588	1.07299	-0.771374	NaN	-0.872314	-0.263157	-0.276524	-0.308607	-1.03696	-0.889854	-0.223135	-0.653624	-0.716345	NaN	S	2	___1		Mitogen-activated protein kinase kinase kinase 7					Phosphoserine							14-3-3 domain binding motif;Aurora-A kinase substrate motif;Calmodulin-dependent protein kinase II substrate motif;Casein kinase II substrate motif;PAK2 kinase substrate motif;Phosphorylase kinase substrate motif;PKA kinase substrate motif;PKC epsilon kinase substrate motif;PKC kinase substrate motif;Pyruvate dehydrogenase kinase substrate motif	1	3.86173e-19	183.6	158.16	173.37	2.4361	UID932
619	O43395	619	O43395	O43395	U4/U6 small nuclear ribonucleoprotein Prp3	PRPF3	WDEQTSNTKGDDDEESDEEAVKKTNKCVLVW		0.900486	0.965333	0.0466976	0.129073	1.25745	NaN	2.54807	2.75379	2.32542	2.07363	NaN	1.18185	2.47543	2.4669	2.50225	2.09844	S	3	___1	DUF1115	U4/U6 small nuclear ribonucleoprotein Prp3					Phosphoserine					In isoform 2.		b-Adrenergic Receptor kinase substrate motif;BARD1 BRCT domain binding motif;Casein kinase I substrate motif;Casein kinase II substrate motif;G protein-coupled receptor kinase 1 substrate motif	1	1.14108e-119	418.28	347.85	62.203	-3.1641	UID933
715	O43491;E9PHY5;E9PK52;Q6R5J7;E9PMV8;H0Y5B0;E9PMG5	715;645;645;93;114;258;167	O43491	O43491	Band 4.1-like protein 2	EPB41L2	KDERVITEEMNGKEISPGSGPGEIRKVEPVT		0.100945	0.341235	0.608962	1.80669	0.541534	0.532831	0.204336	0.575399	0.502836	0.846039	0.753889	0.468838	-0.133572	0.0267849	-0.00900078	-1.55773	S	2	___1		Band 4.1-like protein 2					Phosphoserine					In isoform 2.;In isoform 3.		Casein kinase II substrate motif;ERK1,2 kinase substrate motif;GSK-3, ERK1, ERK2, CDK5 substrate motif;PKA kinase substrate motif;PKC kinase substrate motif;WW domain binding motif	1	7.85452e-16	241.78	199.57	241.78	1.7194	UID934
39	O43491;E9PHY5;E9PK52;E9PII3;E9PJP4;E9PQN0;E9PRG1;E9PIG0;E9PQD2	39;39;39;39;39;39;39;39;39	O43491	O43491	Band 4.1-like protein 2	EPB41L2	KEKPKEVAENQQNQSSDPEEEKGSQPPPAAE		0.922759	0.975204	0.0318688	0.10006	NaN	0.187782	1.36984	1.71104	0.981039	NaN	0.750803	0.942955	1.34606	1.31379	1.34404	0.485703	S	2	___1		Band 4.1-like protein 2					Phosphoserine							Casein kinase II substrate motif;MDC1 BRCT domain binding motif;Plk1 PBD domain binding motif	0.952383	1.21914e-73	349.2	294.68	297.45	0.76248	UID936
87	O43491;E9PHY5;E9PK52;E9PII3;E9PJP4;E9PQN0;E9PRG1;E9PIG0;E9PQD2	87;87;87;87;87;87;87;87;87	O43491	O43491	Band 4.1-like protein 2	EPB41L2	RGISRFIPPWLKKQKSYTLVVAKDGGDKKEP		0.662057	0.853118	-0.0801895	-0.451868	-0.426464	NaN	-0.688875	0.0302906	-0.522911	0.00299835	-0.222002	0.159008	-0.42885	-0.186943	-0.13961	-0.626419	S	2	___1		Band 4.1-like protein 2					Phosphoserine							AMP-activated protein kinase substrate motif;Calmodulin-dependent protein kinase II substrate motif;Casein kinase II substrate motif;Chk1 kinase substrate motif;PKA kinase substrate motif;PKC kinase substrate motif	0.999889	0.000142662	142.97	116.51	142.97	0.88306	UID938
550	O43491;E9PHY5;E9PK52;E9PII3;H0Y5B0	550;550;550;550;41	O43491	O43491	Band 4.1-like protein 2	EPB41L2	PAPHFERTSSKRVSRSLDGAPIGVMDQSLMK		0.0531536	0.236698	-0.33948	-2.26682	-1.85894	-1.76065	-1.60546	-1.55165	-1.3766	-1.28447	-1.02453	NaN	-1.51337	-1.3794	-1.01663	NaN	S	2	___1	FA	Band 4.1-like protein 2					Phosphoserine		Hydrophilic					G protein-coupled receptor kinase 1 substrate motif	0.999995	0.0027908	68.972	52.34	68.972	2.604	UID939
579	O43719	579	O43719	O43719	HIV Tat-specific factor 1	HTATSF1	EFEENGLEKDLDEEGSEKELHENVLDKELEE		0.454612	0.744683	-0.445748	-0.777947	-1.89602	-2.03065	0.621166	0.180504	-0.453342	-1.47663	-1.07591	-0.187229	0.265631	0.220177	0.181496	-1.78465	S	2	___1		HIV Tat-specific factor 1		Asp/Glu-rich (acidic)			Phosphoserine		Mediates interaction with the P-TEFb complex					Casein kinase I substrate motif;Casein kinase II substrate motif;G protein-coupled receptor kinase 1 substrate motif;PKA kinase substrate motif;PKC kinase substrate motif	1	9.98332e-41	276.08	228.31	181.88	0.57985	UID940
529	O43719	529	O43719	O43719	HIV Tat-specific factor 1	HTATSF1	ENGLAKESEDDLNKESEEEVGPTKESEEDDS		0.717782	0.881087	-0.0875317	-0.371824	2.55007	2.80569	1.98108	2.30286	2.33915	2.5401	2.01794	2.81321	2.48867	3.10876	2.80517	1.81039	S	2	___1		HIV Tat-specific factor 1		Asp/Glu-rich (acidic)					Mediates interaction with the P-TEFb complex					b-Adrenergic Receptor kinase substrate motif;BARD1 BRCT domain binding motif;Casein kinase II substrate motif;G protein-coupled receptor kinase 1 substrate motif;PKA kinase substrate motif;PKC kinase substrate motif	1	3.42702e-101	381.54	345.12	381.54	0.06548	UID941
453	O43719	453	O43719	O43719	HIV Tat-specific factor 1	HTATSF1	GEFEEGASENNAKESSPEKEAEEGCPEKESE		0.803778	0.922482	-0.0543003	-0.25515	2.48737	2.37365	2.00238	2.10374	2.7792	2.75054	3.11471	2.57661	2.13034	2.43553	2.61871	1.94679	S	2	___1		HIV Tat-specific factor 1		Asp/Glu-rich (acidic)			Phosphoserine		Mediates interaction with the P-TEFb complex					Casein kinase II substrate motif;Cdc2 kinase substrate motif;CDK kinase substrate motif;CDK1,2,4,6 kinase substrate motif;ERK1,2 kinase substrate motif;Growth associated histone HI kinase substrate motif;GSK-3, ERK1, ERK2, CDK5 substrate motif;MDC1 BRCT domain binding motif;PKA kinase substrate motif;PKC kinase substrate motif;Plk1 PBD domain binding motif;WW domain binding motif	0.99975	1.02106e-62	346.42	305.3	306.53	-0.66338	UID944
702	O43719	702	O43719	O43719	HIV Tat-specific factor 1	HTATSF1	KEVEDADEKLFEDDDSNEKLFDEEEDSSEKL		0.276147	0.580552	0.268592	1.15193	2.06378	2.25024	2.61322	2.40029	2.21111	2.00554	2.24045	1.19142	2.25327	2.39887	2.39084	1.45777	S	2	___1		HIV Tat-specific factor 1		Asp/Glu-rich (acidic)			Phosphoserine		Mediates interaction with the P-TEFb complex					b-Adrenergic Receptor kinase substrate motif;Casein kinase I substrate motif;Casein kinase II substrate motif	1	6.56204e-20	219.92	181.35	158.34	-0.10246	UID947
676	O43719	676	O43719	O43719	HIV Tat-specific factor 1	HTATSF1	KKAEEGDADEKLFEESDDKEDEDADGKEVED		0.14756	0.409759	0.946699	1.58442	2.3164	2.29358	2.13747	1.84265	1.94489	2.17512	-1.3954	NaN	1.74196	1.85115	2.24207	1.4185	S	3	___1		HIV Tat-specific factor 1		Asp/Glu-rich (acidic)			Phosphoserine		Mediates interaction with the P-TEFb complex					b-Adrenergic Receptor kinase substrate motif	1	4.33289e-79	372.7	294.8	85.982	1.4865	UID948
616	O43719	616	O43719	O43719	HIV Tat-specific factor 1	HTATSF1	EFEDDGSEKVLDEEGSEREFDEDSDEKEEEE		0.380175	0.683956	-0.232487	-0.918105	0.860508	1.18978	1.95032	1.50158	1.11693	0.805992	1.79945	1.85781	1.11583	1.18811	1.94593	0.912905	S	2	___1		HIV Tat-specific factor 1		Asp/Glu-rich (acidic)			Phosphoserine		Mediates interaction with the P-TEFb complex					Casein kinase I substrate motif;Casein kinase II substrate motif;G protein-coupled receptor kinase 1 substrate motif;PKA kinase substrate motif;PKC kinase substrate motif	1	8.87293e-10	217.14	117.32	181.68	0.58152	UID951
116	O60264	116	O60264	O60264	SWI/SNF-related matrix-associated actin-dependent regulator of chromatin subfamily A member 5	SMARCA5	LFAHFIQPAAQKTPTSPLKMKPGRPRIKKDE		0.817293	0.929695	-0.081804	-0.237197	0.413944	0.388865	0.112471	0.538435	0.000928879	-0.0116005	-0.461632	0.750624	0.18379	-0.775311	1.09402	1.14237	S	2	___1		SWI/SNF-related matrix-associated actin-dependent regulator of chromatin subfamily A member 5					Phosphoserine							Cdc2 kinase substrate motif;CDK kinase substrate motif;CDK1,2,4,6 kinase substrate motif;ERK1,2 kinase substrate motif;Growth associated histone HI kinase substrate motif;GSK-3, ERK1, ERK2, CDK5 substrate motif;PKA kinase substrate motif;WW domain binding motif	0.986166	0.000267457	141.02	9.7962	124.95	0.35488	UID954
352	O60293	352	O60293	O60293	Zinc finger C3H1 domain-containing protein	ZFC3H1	SQGLQDKEQNLTRRISTSDILSEKKLGEDEE		0.326032	0.629459	0.315263	1.03873	0.30715	-0.139425	-1.22361	-0.562531	-0.458603	0.0293179	-0.247602	-0.227226	-1.28068	-0.932848	-0.594374	NaN	S	2	___1		Zinc finger C3H1 domain-containing protein					Phosphoserine					In isoform 4.		14-3-3 domain binding motif;AMP-activated protein kinase substrate motif;Calmodulin-dependent protein kinase I substrate motif;Calmodulin-dependent protein kinase II substrate motif;Calmodulin-dependent protein kinase IV substrate motif;Casein kinase II substrate motif;Chk1 kinase substrate motif;PAK2 kinase substrate motif;PKA kinase substrate motif;PKC epsilon kinase substrate motif;PKC kinase …	0.992265	4.32333e-07	164.68	88.944	157.86	-0.87197	UID956
527	O60318	527	O60318	O60318	Germinal-center associated nuclear protein	MCM3AP	KPFSLKEKKPGDGEVSPSTEDAPFQHSPLGK		0.471216	0.7559	0.273918	0.761524	0.185217	-0.147657	NaN	-0.251762	-0.199154	NaN	NaN	-0.472038	0.14275	-1.49592	0.219408	-0.280487	S	3	___1		Germinal-center associated nuclear protein							DNA primase			In isoform MCM3AP.		Casein kinase II substrate motif;ERK1,2 kinase substrate motif;GSK-3, ERK1, ERK2, CDK5 substrate motif;WW domain binding motif	0.962955	1.8918e-06	115.76	92.862	115.76	0.67811	UID957
341	O60343	341	O60343	O60343	TBC1 domain family member 4	TBC1D4	VHEGSQKSQPRRRHASAPSHVQPSDSEKNRT		0.612952	0.832765	-0.166442	-0.526304	0.13903	0.0592957	-0.820885	-0.564156	0.141243	-0.338869	NaN	NaN	0.438782	-0.50729	0.470829	-0.659445	S	2	___1	PID	TBC1 domain family member 4				PID 2	Phosphoserine					In isoform 4| isoform 5.		14-3-3 domain binding motif;Akt kinase substrate motif;Calmodulin-dependent protein kinase II substrate motif;Casein kinase II substrate motif;MAPKAPK1 kinase substrate motif;PKA kinase substrate motif;PKC kinase substrate motif;ZIP kinase substrate motif	0.999997	1.25667e-12	151.41	136.25	115.91	0.19405	UID958
480	O60583	480	O60583	O60583	Cyclin-T2	CCNT2	HKQGQSQAASSSSVTSPIKMKIPIANTEKYM		0.0486665	0.228057	-0.464981	-2.27869	NaN	-0.265736	-0.079916	-0.145014	0.548271	0.442665	0.983965	0.50543	0.24033	0.522133	0.87833	0.260023	S	2	___1		Cyclin-T2					Phosphoserine							Cdc2 kinase substrate motif;CDK kinase substrate motif;CDK1,2,4,6 kinase substrate motif;ERK1,2 kinase substrate motif;Growth associated histone HI kinase substrate motif;GSK-3, ERK1, ERK2, CDK5 substrate motif;MAPKAPK2 kinase substrate motif;WW domain binding motif	0.959932	3.39704e-102	384.32	296.22	212.95	1.4169	UID961
601	O60583	601	O60583	O60583	Cyclin-T2	CCNT2	GSKHSADGIPPTVLRSPVGLSSDGISSSSSS		0.457797	0.745187	-0.092733	-0.775748	-1.07624	-0.87945	-1.17538	-1.15845	-1.25524	-1.2929	-0.667999	-1.03026	-1.24518	-1.00771	-1.28323	NaN	S	2	___1		Cyclin-T2					Phosphoserine							ERK1,2 kinase substrate motif;Growth associated histone HI kinase substrate motif;GSK-3, ERK1, ERK2, CDK5 substrate motif;WW domain binding motif	0.999978	0.00145921	68.257	58.336	68.257	0.68762	UID962
494	O60832	494	O60832	O60832	H/ACA ribonucleoprotein complex subunit 4	DKC1	AKAGLESGAEPGDGDSDTTKKKKKKKKAKEV		0.110855	0.358603	0.663246	1.74903	0.954554	0.888798	0.93281	0.992802	0.871168	1.72803	-0.778303	0.577311	1.05387	-0.609362	1.06836	1.07681	S	2	___1		H/ACA ribonucleoprotein complex subunit 4					Phosphoserine		Nuclear and nucleolar localization			In isoform 3.		b-Adrenergic Receptor kinase substrate motif;Casein kinase I substrate motif;Casein kinase II substrate motif	0.984232	3.37497e-51	295.79	223.47	294.93	-1.1382	UID964
451	O60832	451	O60832	O60832	H/ACA ribonucleoprotein complex subunit 4	DKC1	QVVAEAAKTAKRKRESESESDETPPAAPQLI		0.675011	0.861256	-0.0674686	-0.435069	-1.23711	-1.28073	-0.900314	-1.02652	NaN	-0.957125	-0.982698	-1.3572	-0.907257	-1.23529	-0.581999	NaN	S	3	___1		H/ACA ribonucleoprotein complex subunit 4					Phosphoserine		Nuclear and nucleolar localization			In isoform 3.		b-Adrenergic Receptor kinase substrate motif;Casein kinase II substrate motif;G protein-coupled receptor kinase 1 substrate motif;GSK3 kinase substrate motif;PAK2 kinase substrate motif;Pim1 kinase substrate sequence;PKA kinase substrate motif;PKC kinase substrate motif	0.999382	4.28327e-09	136.83	123.4	119.75	2.7742	UID965
601	O60885	601	O60885	O60885	Bromodomain-containing protein 4	BRD4	KEPAPMKSKPPPTYESEEEDKCKPMSYEEKR		0.0954234	0.330898	-0.472298	-1.86256	0.0184917	-0.38859	-1.2667	-0.38936	-0.297087	-0.855913	NaN	0.00925064	0.00886726	0.196833	0.187794	-0.69055	S	3	___1		Bromodomain-containing protein 4				NET	Phosphoserine							b-Adrenergic Receptor kinase substrate motif;BARD1 BRCT domain binding motif;Casein kinase II substrate motif;G protein-coupled receptor kinase 1 substrate motif	0.999998	1.28823e-13	195.46	136.23	112.56	0.85507	UID970
681	O75151	681	O75151	O75151	Lysine-specific demethylase PHF2	PHF2	KEDKPKPVRDEYEYVSDDGELKIDEFPIRRK		0.209798	0.498421	-0.259402	-1.40438	NaN	NaN	-3.01561	-2.75492	-2.9711	-2.74627	NaN	-2.74561	-2.92319	-2.65234	-2.12916	NaN	S	2	___1		Lysine-specific demethylase PHF2					Phosphoserine							Casein kinase I substrate motif	0.999385	0.0333052	57.159	42.806	57.159	-0.3821	UID971
290	O75152;E9PBY7;E9PQ61	290;290;290	O75152	O75152	Zinc finger CCCH domain-containing protein 11A	ZC3H11A	LVRLSLTERLGKRKFSAGGDSDPPLKRSLAQ		0.692455	0.870838	0.14538	0.410156	-0.766861	NaN	-1.2445	-1.09378	-0.94278	-0.476997	0.179247	NaN	-1.39806	-1.32315	-0.990698	-1.71915	S	2	___1		Zinc finger CCCH domain-containing protein 11A					Phosphoserine							14-3-3 domain binding motif;Calmodulin-dependent protein kinase II substrate motif;Pim1 kinase substrate sequence;PKA kinase substrate motif;PKC epsilon kinase substrate motif;PKC kinase substrate motif	0.997513	0.00103468	102.52	74.121	97.273	2.0331	UID972
132	O75152;E9PBY7;E9PQ61;A0A1W2PPR9	132;132;132;132	O75152	O75152	Zinc finger CCCH domain-containing protein 11A	ZC3H11A	QLSVQQNKLSVQSNPSPQLRSVMKVESSENV		0.268138	0.576179	0.21478	1.19006	NaN	-1.27406	-1.20443	-1.20179	-1.18017	-0.817295	-0.988672	-0.93409	-1.52702	-1.60702	-1.69485	NaN	S	2	___1		Zinc finger CCCH domain-containing protein 11A					Phosphoserine							DNA dependent Protein kinase substrate motif;ERK1,2 kinase substrate motif;GSK-3, ERK1, ERK2, CDK5 substrate motif;WW domain binding motif	0.976697	0.0129079	62.14	43.082	62.14	1.4907	UID973
758	O75152;A0A1B0GTU1;A0A1B0GUI2	758;759;759	O75152	O75152	Zinc finger CCCH domain-containing protein 11A	ZC3H11A	SGPSSSQMSMKTRRLSSASTGKPPLSVEDDF		0.796473	0.919571	0.0814381	0.265678	1.29045	1.0241	NaN	0.149937	1.14327	0.727221	1.22913	1.03046	0.588188	0.793873	1.2679	-0.196205	S	3	___1		Zinc finger CCCH domain-containing protein 11A					Phosphoserine							14-3-3 domain binding motif;Calmodulin-dependent protein kinase II substrate motif;Casein kinase II substrate motif;G protein-coupled receptor kinase 1 substrate motif;MAPKAPK1 kinase substrate motif;PAK2 kinase substrate motif;PKA kinase substrate motif;PKC epsilon kinase substrate motif;PKC kinase substrate motif	0.987367	5.31945e-19	178.15	155.16	140.57	1.0247	UID974
108	O75152;E9PBY7;E9PQ61;A0A1W2PPR9	108;108;108;108	O75152	O75152	Zinc finger CCCH domain-containing protein 11A	ZC3H11A	LFLPPSKTVLPTVPESPEEEVKASQLSVQQN		0.00984636	0.106654	0.553648	3.25952	NaN	0.645422	0.361313	0.585655	0.373581	0.961437	0.300184	0.235729	0.207014	0.100861	-0.149784	-0.503002	S	2	___1	zf-CCCH_3	Zinc finger CCCH domain-containing protein 11A					Phosphoserine							b-Adrenergic Receptor kinase substrate motif;Casein kinase II substrate motif;ERK1,2 kinase substrate motif;GSK-3, ERK1, ERK2, CDK5 substrate motif;WW domain binding motif	0.999999	2.19e-17	187.16	141.88	163.23	1.469	UID976
30	O75379	30	O75379	O75379	Vesicle-associated membrane protein 4	VAMP4	TGSVKSERRNLLEDDSDEEEDFFLRGPSGPR		0.660614	0.852439	-0.241836	-0.455854	-0.121431	0.307833	2.11406	1.80697	2.04469	1.64853	NaN	NaN	1.08043	1.931	2.04515	1.11119	S	2	___1		Vesicle-associated membrane protein 4					Phosphoserine						Cytoplasmic	b-Adrenergic Receptor kinase substrate motif;BARD1 BRCT domain binding motif;Casein kinase I substrate motif;Casein kinase II substrate motif	1	1.05871e-42	303.13	278.93	275.42	-0.86314	UID978
282	O75381	282	O75381	O75381	Peroxisomal membrane protein PEX14	PEX14	VSNESTSSSPGKEGHSPEGSTVTYHLLGPQE		0.773156	0.909258	0.0602741	0.296175	1.69954	1.63639	1.60077	1.47633	1.9307	1.13028	1.51854	1.67849	1.34561	1.44121	2.20573	0.92281	S	3	___1		Peroxisomal membrane protein PEX14												Casein kinase I substrate motif;Casein kinase II substrate motif;ERK1,2 kinase substrate motif;G protein-coupled receptor kinase 1 substrate motif;GSK3 kinase substrate motif;GSK-3, ERK1, ERK2, CDK5 substrate motif;PKA kinase substrate motif;WW domain binding motif	0.999978	8.92374e-16	162.12	137.48	162.12	0.66546	UID979
137	O75396;A0A087X1A9	137;12	O75396	O75396	Vesicle-trafficking protein SEC22b	SEC22B	TKKLYIDSCARRNLGSINTELQDVQRIMVAN		0.636118	0.838194	-0.117789	-0.487933	0.707169	0.741316	0.802504	1.19307	0.828138	1.31691	1.43961	1.27752	1.12694	1.25162	1.21754	-0.0173855	S	2	___1	Synaptobrevin	Vesicle-trafficking protein SEC22b				v-SNARE coiled-coil homology	Phosphoserine						Cytoplasmic	Casein kinase II substrate motif	1	1.66034e-45	322.75	288.07	288.45	-0.12649	UID980
938	O75400	938	O75400	O75400	Pre-mRNA-processing factor 40 homolog A	PRPF40A	TGKDSGNWDTSGSELSEGELEKRRRTLLEQL		0.83588	0.93806	0.0559439	0.213255	-0.0452995	-0.136873	0.653257	-0.0402088	-0.083807	-0.472044	-0.519968	-0.366093	0.655476	0.23679	-0.39007	NaN	S	2	___1		Pre-mRNA-processing factor 40 homolog A					Phosphoserine					In isoform 5.		Casein kinase II substrate motif;G protein-coupled receptor kinase 1 substrate motif	0.999788	1.1937e-43	280.81	253.55	194.27	2.6502	UID981
888	O75400	888	O75400	O75400	Pre-mRNA-processing factor 40 homolog A	PRPF40A	KKKSKKRRHKSDSPESDAEREKDKKEKDRES		0.740659	0.892631	0.183885	0.340316	-1.37627	-1.83539	0.695976	0.609278	-0.0680828	-0.521929	-1.35616	-1.42533	0.345213	0.190264	-0.120308	-1.23341	S	2	___1		Pre-mRNA-processing factor 40 homolog A					Phosphoserine					In isoform 5.		b-Adrenergic Receptor kinase substrate motif;Casein kinase II substrate motif	1	8.06537e-06	151.13	111.55	120.96	-0.20151	UID982
129	O75475	129	O75475	O75475	PC4 and SFRS1-interacting protein	PSIP1	ETSVSKEDTDHEEKASNEDVTKAVDITTPKA		0.0151563	0.138585	-0.957901	-2.92553	-0.757875	-0.970348	-0.715694	0.267639	-1.07353	-1.50281	0.650288	0.603933	0.112411	-0.381821	0.591927	-0.581947	S	3	___1		PC4 and SFRS1-interacting protein					Phosphoserine							Casein kinase I substrate motif;Casein kinase II substrate motif;PKA kinase substrate motif;PKC kinase substrate motif;Pyruvate dehydrogenase kinase substrate motif	1	3.00614e-22	226.45	205.05	226.45	-0.98088	UID983
106	O75475	106	O75475	O75475	PC4 and SFRS1-interacting protein	PSIP1	KFSSQQAATKQSNASSDVEVEEKETSVSKED		0.486986	0.769878	0.21447	0.740439	1.67397	1.47324	2.51135	NaN	NaN	2.46515	2.06178	1.58533	NaN	1.67653	NaN	1.94219	S	2	___1		PC4 and SFRS1-interacting protein					Phosphoserine							Casein kinase II substrate motif;MAPKAPK2 kinase substrate motif;MDC1 BRCT domain binding motif;Plk1 PBD domain binding motif	0.992652	8.40199e-45	325.67	274.11	325.67	1.6487	UID985
273	O75475	273	O75475	O75475	PC4 and SFRS1-interacting protein	PSIP1	ESKRKNLAKTGVTSTSDSEEEGDDQEGEKKR		0.420286	0.719515	-0.5543	-0.849519	-0.798382	-1.23657	0.121941	0.691973	0.0979939	-0.990967	NaN	NaN	0.833727	-1.7462	1.18131	0.539024	S	2	___1		PC4 and SFRS1-interacting protein					Phosphoserine							Casein kinase II substrate motif	0.983494	4.25274e-60	286.68	260.25	256.96	0.8326	UID986
133	Q5JRI1;O75494	133;133	Q5JRI1	Q5JRI1	Serine/arginine-rich splicing factor 10	SRSF10	RSRSRSYERRRSRSRSFDYNYRRSYSPRNRP		0.912229	0.968645	0.0228395	0.113049	1.6268	1.39085	1.62285	1.78774	0.991421	1.37054	1.9087	1.48398	1.84051	1.47913	0.915564	1.02528	S	2	___1		Serine/arginine-rich splicing factor 10		Arg/Ser-rich (RS domain)			Phosphoserine							14-3-3 domain binding motif;Akt kinase substrate motif;Calmodulin-dependent protein kinase II substrate motif;Casein kinase II substrate motif;MAPKAPK1 kinase substrate motif;MAPKAPK2 kinase substrate motif;PKA kinase substrate motif;PKC kinase substrate motif	1	0.00010526	191.79	158.59	162.25	-0.12545	UID988
129	O75533;B4DGZ4	129;129	O75533	O75533	Splicing factor 3B subunit 1	SF3B1	DREDEYKKHRRTMIISPERLDPFADGGKTPD		0.0597891	0.253575	0.465074	2.12232	-1.51019	-1.49312	-1.5551	-1.46274	-1.29595	-0.356407	-1.67604	-1.61156	-1.64244	-2.27096	-1.48256	-1.7804	S	2	___1		Splicing factor 3B subunit 1					Phosphoserine							Casein kinase II substrate motif;Cdc2 kinase substrate motif;CDK kinase substrate motif;CDK1,2,4,6 kinase substrate motif;ERK1,2 kinase substrate motif;GSK-3, ERK1, ERK2, CDK5 substrate motif;WW domain binding motif	0.999999	0.000881494	106.29	40.79	106.29	0.64615	UID990
2833	O75592	2833	O75592	O75592	E3 ubiquitin-protein ligase MYCBP2	MYCBP2	APVKTKLDPPRERSKSDSYTLDPDTLRKKKM		0.335066	0.640763	0.188541	1.01844	-0.92042	-1.40821	-0.845678	-1.25204	-0.706785	-0.807903	-0.765516	-1.26563	-1.54251	-0.888586	-1.43133	NaN	S	2	___1		E3 ubiquitin-protein ligase MYCBP2												14-3-3 domain binding motif;Akt kinase substrate motif;Calmodulin-dependent protein kinase II substrate motif;Casein kinase II substrate motif;G protein-coupled receptor kinase 1 substrate motif;MAPKAPK1 kinase substrate motif;PKA kinase substrate motif;PKC kinase substrate motif	0.988776	5.23466e-11	165.02	150.86	165.02	3.1568	UID991
2751	O75592	2751	O75592	O75592	E3 ubiquitin-protein ligase MYCBP2	MYCBP2	SDAAKLRSDSHSRSLSPNHNTLQTLKSDGRM		0.356165	0.66763	-0.327984	-0.979191	-0.564352	-0.657598	-0.36095	-0.689507	0.431694	0.428654	0.466043	-0.19231	NaN	-0.468874	0.565704	NaN	S	2	___1		E3 ubiquitin-protein ligase MYCBP2		Ser-rich			Phosphoserine							14-3-3 domain binding motif;Calmodulin-dependent protein kinase II substrate motif;ERK1,2 kinase substrate motif;GSK-3, ERK1, ERK2, CDK5 substrate motif;MAPKAPK2 kinase substrate motif;PKA kinase substrate motif;PKC kinase substrate motif;WW domain binding motif	0.999992	1.97212e-20	254.72	202.77	254.72	0.67049	UID992
3467	O75592	3467	O75592	O75592	E3 ubiquitin-protein ligase MYCBP2	MYCBP2	ILPARVKAIPRRRVNSGDTEVGSSLLRHPSP		0.17457	0.444478	0.71362	1.47403	0.475782	0.31344	0.178978	0.0572014	0.410702	0.33252	0.367033	0.47633	-0.459345	-0.0414658	-2.4368	NaN	S	2	___1		E3 ubiquitin-protein ligase MYCBP2					Phosphoserine							14-3-3 domain binding motif;Akt kinase substrate motif;Calmodulin-dependent protein kinase II substrate motif;Casein kinase II substrate motif;MAPKAPK1 kinase substrate motif;PKA kinase substrate motif;PKC kinase substrate motif;ZIP kinase substrate motif	1	2.9346e-45	318.62	289.14	318.62	1.0858	UID993
225	O75643	225	O75643	O75643	U5 small nuclear ribonucleoprotein 200 kDa helicase	SNRNP200	EEGDEDVYGEVREEASDDDMEGDEAVVRCTL		0.136731	0.396129	0.316112	1.65397	2.73496	3.12149	3.35	3.49519	3.16928	3.48344	NaN	NaN	2.88079	2.66588	3.35781	2.73398	S	2	___1		U5 small nuclear ribonucleoprotein 200 kDa helicase					Phosphoserine							AMP-activated protein kinase substrate motif;Casein kinase I substrate motif;Casein kinase II substrate motif;Pyruvate dehydrogenase kinase substrate motif	1	7.25869e-78	366.94	335.87	360.06	-0.002934	UID994
138	O75683	138	O75683	O75683	Surfeit locus protein 6	SURF6	EKIQEARGQGSAKELSPAALEKRRRRKQERD		0.177582	0.449159	0.408929	1.46267	-0.997784	-1.63217	-1.32494	-1.60973	-1.70706	-0.536417	-1.17792	-1.82838	-1.60421	-2.43283	-1.50806	NaN	S	2	___1	SURF6	Surfeit locus protein 6					Phosphoserine							ERK1,2 kinase substrate motif;GSK-3, ERK1, ERK2, CDK5 substrate motif;PKA kinase substrate motif;PKC kinase substrate motif;WW domain binding motif	1	0.0254404	51.113	18.971	51.113	0.20772	UID995
383	O75717	383	O75717	O75717	WD repeat and HMG-box DNA-binding protein 1	WDHD1	GRPRQRSHILEDDENSVDISMLKTGSSLLKE		0.307915	0.618353	0.207194	1.08075	-0.2363	-0.160372	0.123825	0.466988	0.161055	0.674667	-0.130922	-0.133371	-0.0586834	-0.27396	0.419188	NaN	S	2	___1		WD repeat and HMG-box DNA-binding protein 1					Phosphoserine							Casein kinase I substrate motif;G protein-coupled receptor kinase 1 substrate motif;GSK3 kinase substrate motif	1	2.16535e-41	275.91	254.13	243.97	-0.43822	UID996
503	O75925	503	O75925	O75925	E3 SUMO-protein ligase PIAS1	PIAS1	SPLNNKGILSLPHQASPVSRTPSLPAVDTSY		0.92512	0.975075	-0.0246795	-0.0963834	-0.339935	-0.15612	-0.566797	-0.32205	-0.50827	-0.0425339	0.469679	0.200035	-0.693209	-0.762508	-0.013586	-0.988041	S	2	___1		E3 SUMO-protein ligase PIAS1					Phosphoserine					In isoform 3.		Casein kinase II substrate motif;ERK1,2 kinase substrate motif;GSK-3, ERK1, ERK2, CDK5 substrate motif;WW domain binding motif	0.99958	1.22251e-12	179.97	135.66	138.77	0.96399	UID998
32	O76024	32	O76024	O76024	Wolframin	WFS1	PAPQPQARSRLNATASLEQERSERPRAPGPQ		0.611445	0.833426	0.158548	0.535679	NaN	NaN	-0.38529	0.105705	0.418543	0.47628	0.233925	0.328766	NaN	NaN	0.0643749	-0.646019	S	2	___1		Wolframin												Casein kinase II substrate motif	0.999935	5.26114e-22	282.2	227.12	214	-0.48416	UID999
475	O94782	475	O94782	O94782	Ubiquitin carboxyl-terminal hydrolase 1	USP1	VQEDELSKVEESSEISPEPKTEMKTLRWAIS		0.0691385	0.268461	0.590094	2.09813	-0.892647	NaN	-0.531115	-0.410482	0.0370293	-0.289455	-0.34519	-0.760546	-1.48207	-1.61269	-0.836653	NaN	S	2	___1	UCH	Ubiquitin carboxyl-terminal hydrolase 1				USP	Phosphoserine							Casein kinase II substrate motif;ERK1,2 kinase substrate motif;GSK-3, ERK1, ERK2, CDK5 substrate motif;MAPKAPK2 kinase substrate motif;WW domain binding motif	0.999692	1.44369e-07	131.26	81.218	131.26	1.2907	UID1003
91	O94826	91	O94826	O94826	Mitochondrial import receptor subunit TOM70	TOMM70A	GLKRNSERKTPEGRASPAPGSGHPEGPGAHL		0.773682	0.908179	0.101586	0.295466	4.90007	4.71889	3.35211	3.68838	4.15227	3.54596	4.47132	4.72646	3.32686	3.53554	3.98113	3.70687	S	3	___1		Mitochondrial import receptor subunit TOM70					Phosphoserine						Cytoplasmic	ERK1,2 kinase substrate motif;GSK-3, ERK1, ERK2, CDK5 substrate motif;PKA kinase substrate motif;PKC kinase substrate motif;WW domain binding motif	1	7.92163e-20	176.78	162.89	140.42	-1.5142	UID1005
120	O95218	120	O95218	O95218	Zinc finger Ran-binding domain-containing protein 2	ZRANB2	GFNERENVEYIEREESDGEYDEFGRKKKKYR		0.0665298	0.264751	1.15975	2.05872	2.2066	2.28275	2.93341	2.49665	2.2561	2.10159	-1.43495	1.22648	1.78765	1.89496	2.27951	1.56494	S	2	___1		Zinc finger Ran-binding domain-containing protein 2					Phosphoserine							14-3-3 domain binding motif;b-Adrenergic Receptor kinase substrate motif;Calmodulin-dependent protein kinase II substrate motif;Calmodulin-dependent protein kinase IV substrate motif;Casein kinase II substrate motif;Chk1 kinase substrate motif;PKA kinase substrate motif;PKC epsilon kinase substrate motif;PKC kinase substrate motif	1	1.09205e-69	316.44	291.51	259.75	-0.47601	UID1006
153	O95218	153	O95218	O95218	Zinc finger Ran-binding domain-containing protein 2	ZRANB2	AVGPASILKEVEDKESEGEEEDEDEDLSKYK		0.0187035	0.145299	0.801133	2.94021	3.91965	3.82276	3.24694	3.6833	4.19556	3.94422	NaN	NaN	2.4248	3.00064	3.74512	2.83318	S	3	___1		Zinc finger Ran-binding domain-containing protein 2					Phosphoserine		Required for nuclear targeting					b-Adrenergic Receptor kinase substrate motif;Casein kinase I substrate motif;Casein kinase II substrate motif;G protein-coupled receptor kinase 1 substrate motif;PKA kinase substrate motif;PKC kinase substrate motif	1	1.87131e-35	234.11	196.09	210.26	-0.70744	UID1007
188	O95218	188	O95218	O95218	Zinc finger Ran-binding domain-containing protein 2	ZRANB2	EDEDDADLSKYNLDASEEEDSNKKKSNRRSR		0.0337228	0.193745	0.609782	2.4592	2.17755	2.14649	2.25981	2.17001	2.94703	2.67329	2.30617	2.1483	0.871714	1.81588	1.93794	1.63546	S	2	___1		Zinc finger Ran-binding domain-containing protein 2					Phosphoserine		Required for nuclear targeting					BARD1 BRCT domain binding motif;Casein kinase II substrate motif;G protein-coupled receptor kinase 1 substrate motif	1	7.3961e-71	372.27	340.02	372.27	-0.62672	UID1008
193	O95218	193	O95218	O95218	Zinc finger Ran-binding domain-containing protein 2	ZRANB2	ADLSKYNLDASEEEDSNKKKSNRRSRSKSRS		0.645778	0.8435	-0.123	-0.48365	-1.01463	-0.861555	-1.47573	NaN	-1.03131	NaN	NaN	NaN	-1.13518	-1.28865	-0.330156	-1.13723	S	3	___1		Zinc finger Ran-binding domain-containing protein 2					Phosphoserine		Required for nuclear targeting					b-Adrenergic Receptor kinase substrate motif;Casein kinase I substrate motif;PKA kinase substrate motif;PKC kinase substrate motif	0.999948	0.00121089	80.859	62.279	80.859	1.5647	UID1009
801	O95239	801	O95239	O95239	Chromosome-associated kinesin KIF4A	KIF4A	ESGENPPPKLRRRTFSLTEVRGQVSESEDSI		0.255127	0.562236	-0.442678	-1.21542	-0.753525	-0.892365	-2.14145	-1.74727	-2.00695	-1.34745	-0.332039	-0.433428	-1.77047	-1.26213	-1.39605	NaN	S	2	___1		Chromosome-associated kinesin KIF4A	+				Phosphoserine		Interaction with PRC1					14-3-3 domain binding motif;Akt kinase substrate motif;Calmodulin-dependent protein kinase II substrate motif;Casein kinase II substrate motif;MAPKAPK1 kinase substrate motif;p70 Ribosomal S6 kinase substrate motif;Phosphorylase kinase substrate motif;PKA kinase substrate motif;PKC kinase substrate motif;ZIP kinase substrate motif	0.977045	0.0312689	51.436	42.663	51.436	0.97169	UID1010
102	O95251	102	O95251	O95251	Histone acetyltransferase KAT7	KAT7	VTPKKYPLRQTRSSGSETEQVVDFSDRETKN		0.994703	0.998577	0.00126085	0.00687962	NaN	-0.266233	-0.922918	-0.704962	-0.74378	-0.557947	-0.350595	NaN	-0.62318	-1.06745	-0.520489	NaN	S	2	___1		Histone acetyltransferase KAT7					Phosphoserine					In isoform 3| isoform 5.		Casein kinase II substrate motif;G protein-coupled receptor kinase 1 substrate motif	0.859723	2.28677e-08	136.17	120.9	136.17	-1.0803	UID1013
158	O95292	158	O95292	O95292	Vesicle-associated membrane protein-associated protein B/C	VAPB	TTASKTETPIVSKSLSSSLDDTEVKKVMEEC		0.626327	0.833997	0.118804	0.502308	1.69978	1.79442	0.892717	1.40343	1.39891	1.87731	1.93525	1.66008	1.2957	1.45234	1.419	0.591375	S	2	___1		Vesicle-associated membrane protein-associated protein B/C					Phosphoserine					In isoform 2.	Cytoplasmic	Calmodulin-dependent protein kinase II substrate motif;Casein kinase II substrate motif;Chk1 kinase substrate motif;MAPKAPK2 kinase substrate motif;PKA kinase substrate motif;PKC kinase substrate motif	0.999728	6.4146e-45	327.44	272.4	209.67	0.33431	UID1014
160	O95292	160	O95292	O95292	Vesicle-associated membrane protein-associated protein B/C	VAPB	ASKTETPIVSKSLSSSLDDTEVKKVMEECKR		0.110951	0.357443	0.210506	1.7917	-0.857462	-0.760731	-1.09816	-0.870026	-0.761103	NaN	-0.947973	-0.759602	-1.31919	-1.19058	-1.18266	NaN	S	2	___1		Vesicle-associated membrane protein-associated protein B/C	+				Phosphoserine					In isoform 2.	Cytoplasmic	Casein kinase II substrate motif;G protein-coupled receptor kinase 1 substrate motif;MAPKAPK2 kinase substrate motif;MDC1 BRCT domain binding motif;Plk1 PBD domain binding motif;Pyruvate dehydrogenase kinase substrate motif	0.863127	4.58458e-08	143.94	90.382	143.94	1.4834	UID1015
206	O95292	206	O95292	O95292	Vesicle-associated membrane protein-associated protein B/C	VAPB	KEEDGLRMRKTVQSNSPISALAPTGKEEGLS		0.171506	0.43917	0.322075	1.48576	0.120319	0.0723476	-0.257521	0.0785351	-0.149601	-0.130781	0.114031	0.046751	-0.706139	-0.217638	-1.06963	NaN	S	2	___1		Vesicle-associated membrane protein-associated protein B/C										In isoform 2.	Cytoplasmic	Casein kinase II substrate motif;ERK1,2 kinase substrate motif;G protein-coupled receptor kinase 1 substrate motif;GSK-3, ERK1, ERK2, CDK5 substrate motif;WW domain binding motif	0.999524	1.56803e-17	174.19	131.45	174.19	-0.084642	UID1016
133	O95295	133	O95295	O95295	SNARE-associated protein Snapin	SNAPIN	ARRRAMLDSGIYPPGSPGK____________		0.132488	0.393105	-0.248492	-1.65413	-0.638632	-0.870958	-1.22625	-0.907587	-0.762032	-0.601723	-0.315657	-0.473156	-1.00597	-0.696407	-0.439001	NaN	S	2	___1		SNARE-associated protein Snapin					Phosphoserine		Interaction with TOR1A					Cdc2 kinase substrate motif;CDK kinase substrate motif;CDK1,2,4,6 kinase substrate motif;ERK1,2 kinase substrate motif;GSK-3, ERK1, ERK2, CDK5 substrate motif;WW domain binding motif	0.99983	1.126e-05	120.32	104.74	103.76	1.3564	UID1017	CDK2
210	O95297	210	O95297	O95297	Myelin protein zero-like protein 1	MPZL1	NSKRDYTGCSTSESLSPVKQAPRKSPSDTEG		0.931484	0.977346	-0.0129972	-0.0891179	NaN	NaN	-1.292	-0.804213	-0.5762	-0.725534	-0.742596	-0.894562	-0.989506	-0.762308	-0.793474	NaN	S	2	___1		Myelin protein zero-like protein 1					Phosphoserine					In isoform 3.;In isoform 5.	Cytoplasmic	Casein kinase I substrate motif;Cdc2 kinase substrate motif;CDK kinase substrate motif;CDK1,2,4,6 kinase substrate motif;ERK1,2 kinase substrate motif;GSK-3, ERK1, ERK2, CDK5 substrate motif;MAPKAPK2 kinase substrate motif;WW domain binding motif	0.909563	3.70289e-08	127.71	108.97	102.5	0.41999	UID1018
221	O95297	221	O95297	O95297	Myelin protein zero-like protein 1	MPZL1	SESLSPVKQAPRKSPSDTEGLVKSLPSGSHQ		0.399129	0.702013	0.197733	0.885105	-0.981438	-1.13402	-1.22097	-0.451754	-0.142002	-0.478237	-0.965078	-0.796522	-1.37271	-0.786184	-0.741856	NaN	S	2	___1		Myelin protein zero-like protein 1					Phosphoserine					In isoform 3.;In isoform 5.	Cytoplasmic	Casein kinase II substrate motif;DNA dependent Protein kinase substrate motif;PKA kinase substrate motif;PKC kinase substrate motif	0.998498	3.02465e-06	131.66	76.892	131.66	1.3116	UID1019
215	O95391	215	O95391	O95391	Pre-mRNA-splicing factor SLU7	SLU7	LQEELASGKLVEQANSPKHQWGEEEPNSQME		0.475558	0.759423	-0.140039	-0.741303	0.960892	0.933012	0.602991	1.44231	0.590811	0.382048	0.626961	1.35166	0.944695	1.00914	1.11888	0.700956	S	2	___1	Slu7	Pre-mRNA-splicing factor SLU7					Phosphoserine							ERK1,2 kinase substrate motif;Growth associated histone HI kinase substrate motif;GSK-3, ERK1, ERK2, CDK5 substrate motif;PKA kinase substrate motif;PKC kinase substrate motif;WW domain binding motif	1	2.69102e-05	186.87	155.57	155	1.6853	UID1021
195	O95400	195	O95400	O95400	CD2 antigen cytoplasmic tail-binding protein 2	CD2BP2	ARGGGKGRKGPGQPSSPQRLDRLSGLADQMV		0.76661	0.906229	-0.274815	-0.307099	-0.970737	-0.955338	-1.12658	-2.40726	-3.68546	NaN	-1.08701	0.320566	-1.20858	-1.71977	-4.07649	NaN	S	2	___1		CD2 antigen cytoplasmic tail-binding protein 2					Phosphoserine							Cdc2 kinase substrate motif;CDK kinase substrate motif;CDK1,2,4,6 kinase substrate motif;ERK1,2 kinase substrate motif;Growth associated histone HI kinase substrate motif;GSK-3, ERK1, ERK2, CDK5 substrate motif;MDC1 BRCT domain binding motif;Plk1 PBD domain binding motif;WW domain binding motif	0.997527	1.38195e-05	186.97	143.67	186.97	0.41659	UID1022
619	O95453	619	O95453	O95453	Poly(A)-specific ribonuclease PARN	PARN	GRKKAKKLKRMKKELSPAGSISKNSPATLFE		0.222521	0.510424	0.247845	1.31038	-0.201559	-0.364191	-0.664906	-0.336714	-0.25318	-0.117508	-0.0591812	-0.516483	NaN	-1.21441	-0.444	-0.620201	S	2	___1		Poly(A)-specific ribonuclease PARN					Phosphoserine							Calmodulin-dependent protein kinase II substrate motif;Chk1 kinase substrate motif;ERK1,2 kinase substrate motif;G protein-coupled receptor kinase 1 substrate motif;GSK3 kinase substrate motif;GSK-3, ERK1, ERK2, CDK5 substrate motif;PKA kinase substrate motif;PKC kinase substrate motif;WW domain binding motif	1	8.49499e-06	135.8	49.66	135.8	0.86007	UID1024
239	O95671	239	O95671	O95671	N-acetylserotonin O-methyltransferase-like protein	ASMTL	VKHDSIPAADTFEDLSDVEGGGSEPTQRDAG		0.197151	0.480184	-0.846759	-1.40671	-1.6792	-2.56651	NaN	0.16794	-0.16757	0.165222	NaN	-0.313246	0.727148	0.385303	-0.0915833	-0.553957	S	3	___1		N-acetylserotonin O-methyltransferase-like protein					Phosphoserine							Casein kinase I substrate motif;Casein kinase II substrate motif	1	1.70014e-22	192.42	178.83	192.42	0.17289	UID1025
21	O95674	21	O95674	O95674	Phosphatidate cytidylyltransferase 2	CDS2	QRVAHEPVAPPEDKESESEAKVDGETASDSE		0.922964	0.975011	-0.0213243	-0.0994465	3.1522	3.47781	2.3499	2.8047	3.32391	3.09992	2.82489	NaN	3.0352	2.98301	3.53217	2.90504	S	2	___1		Phosphatidate cytidylyltransferase 2					Phosphoserine					In isoform 2.		b-Adrenergic Receptor kinase substrate motif;Casein kinase I substrate motif;Casein kinase II substrate motif;G protein-coupled receptor kinase 1 substrate motif;PKA kinase substrate motif;PKC kinase substrate motif	0.994075	1.01248e-30	217.65	201.92	171.98	1.1748	UID1026
33	O95674	33	O95674	O95674	Phosphatidate cytidylyltransferase 2	CDS2	DKESESEAKVDGETASDSESRAESAPLPVSA		0.92214	0.975162	0.0590167	0.100513	0.977238	0.94721	2.74475	3.67208	2.74937	1.98115	1.55861	1.49258	NaN	2.8864	3.10551	1.55498	S	2	___1		Phosphatidate cytidylyltransferase 2					Phosphoserine					In isoform 2.		Casein kinase I substrate motif;Casein kinase II substrate motif;G protein-coupled receptor kinase 1 substrate motif;GSK3 kinase substrate motif	0.999136	2.57191e-16	254.89	186.35	254.89	-3.498	UID1027
56	O95758;B1ALY4;X6R242	56;59;62	O95758	O95758	Polypyrimidine tract-binding protein 3	PTBP3	NGNDSKKFKRDRPPCSPSRVLHLRKIPCDVT		0.142533	0.406385	0.341219	1.60692	-1.33937	-1.40273	-1.48979	-1.42322	NaN	-0.956432	-1.07626	-1.86645	-1.83386	-2.25958	-1.2669	-1.67811	S	2	___1		Polypyrimidine tract-binding protein 3										In isoform 7.		Casein kinase II substrate motif;Cdc2 kinase substrate motif;CDK kinase substrate motif;CDK1,2,4,6 kinase substrate motif;ERK1,2 kinase substrate motif;GSK-3, ERK1, ERK2, CDK5 substrate motif;WW domain binding motif	0.981748	0.0251979	51.268	24.595	51.268	-1.7916	UID1030
268	O95831	268	O95831	O95831	Apoptosis-inducing factor 1, mitochondrial	AIFM1	YEKCLIATGGTPRSLSAIDRAGAEVKSRTTL		0.362044	0.671039	0.238899	0.966618	-0.720833	-0.797247	-1.41039	-0.707552	-1.25897	NaN	-0.806402	NaN	-1.19313	-0.851608	-1.33841	-1.89994	S	2	___1		Apoptosis-inducing factor 1| mitochondrial					Phosphoserine		FAD-dependent oxidoreductase			In isoform 2.;In isoform 5.		14-3-3 domain binding motif;Calmodulin-dependent protein kinase II substrate motif;Casein kinase II substrate motif;PKA kinase substrate motif;PKC kinase substrate motif;Pyruvate dehydrogenase kinase substrate motif	0.996824	0.00600702	83.948	16.051	83.948	1.0201	UID1031
165	Q9NZH5;O95997	165;165	Q9NZH5	Q9NZH5	Securin-2;Securin	PTTG2;PTTG1	DEEGELEKLFQLGPPSPVKMPSPPWECNLLQ		0.977904	0.989715	-0.00710812	-0.0284765	-1.56408	-1.59095	-1.38858	-1.43128	-1.04568	-0.575901	-0.801878	-1.38822	-1.6973	-1.6184	-0.789049	NaN	S	2	___1	Securin	Securin;Securin-2					Phosphoserine;Phosphoserine| by CDK1	Abolishes phosphorylation			SH3-binding			Cdc2 kinase substrate motif;CDK kinase substrate motif;CDK1,2,4,6 kinase substrate motif;DNA dependent Protein kinase substrate motif;ERK1,2 kinase substrate motif;GSK-3, ERK1, ERK2, CDK5 substrate motif;WW domain binding motif	1	1.53194e-07	156.69	112.49	156.69	0.27275	UID1034	CDK1
181	O96013	181	O96013	O96013	Serine/threonine-protein kinase PAK 4	PAK4	GSGGPQESSRDKRPLSGPDVGTPQPAGLASG		0.198455	0.481814	-0.326782	-1.37733	1.10549	0.698637	0.377571	0.782492	1.53356	1.07713	1.42806	0.971003	1.0594	1.46865	1.89253	0.715921	S	3	___1		Serine/threonine-protein kinase PAK 4					Phosphoserine		Linker			In isoform 2.;In isoform 3.;In isoform 4.		14-3-3 domain binding motif;Calmodulin-dependent protein kinase II substrate motif;Casein kinase II substrate motif;MAPKAPK2 kinase substrate motif;PKA kinase substrate motif;PKC kinase substrate motif;Pyruvate dehydrogenase kinase substrate motif	0.999996	1.88182e-09	144.78	125.23	144.78	-0.20445	UID1035
474	O96013;M0R1R1	474;32	O96013	O96013	Serine/threonine-protein kinase PAK 4	PAK4	FGFCAQVSKEVPRRKSLVGTPYWMAPELISR		0.208627	0.49758	-0.317911	-1.35442	-1.43202	-1.50988	-0.846695	-1.70341	-0.532509	-1.33503	NaN	-1.10455	-0.586853	-1.02398	-0.590443	-1.23757	S	2	___1	Pkinase	Serine/threonine-protein kinase PAK 4				Protein kinase	Phosphoserine| by autocatalysis	Approximately 3-fold increased autophosphorylation						14-3-3 domain binding motif;Aurora-A kinase substrate motif;Calmodulin-dependent protein kinase II alpha substrate motif;Calmodulin-dependent protein kinase II substrate motif;Calmodulin-dependent protein kinase IV substrate motif;Chk1 kinase substrate motif;G protein-coupled receptor kinase 1 substrate motif;PAK2 kinase substrate motif;Phosphorylase kinase substrate motif;PKA kinase substrate mo…	0.999994	2.37091e-08	131.24	113.54	131.24	2.1625	UID1036	PAK4
16	P05023	16	P05023	P05023	Sodium/potassium-transporting ATPase subunit alpha-1	ATP1A1	MGKGVGRDKYEPAAVSEQGDKKGKKGKKDRD		0.458986	0.743438	0.232249	0.770207	-0.741747	-0.782501	-0.945583	-0.720884	-1.01053	-0.178997	-0.000780106	-0.458628	-1.49237	-0.885195	-1.0692	-1.86756	S	3	___1		Sodium/potassium-transporting ATPase subunit alpha-1					Phosphoserine					In isoform 3.	Cytoplasmic	G protein-coupled receptor kinase 1 substrate motif	1	1.59387e-12	154.26	97.413	154.26	0.20469	UID1037
304	P05388;F8VWS0;Q8NHW5;F8W1K8	304;268;304;94	P05388	P05388	60S acidic ribosomal protein P0;60S acidic ribosomal protein P0-like	RPLP0;RPLP0P6	PAAAAAPAKVEAKEESEESDEDMGFGLFD__		0.166763	0.434414	0.39433	1.52096	0.536903	0.310707	0.84803	0.853533	1.21452	1.45979	NaN	NaN	0.203243	0.5837	0.946165	0.171888	S	2	___1	Ribosomal_60s	60S acidic ribosomal protein P0;60S acidic ribosomal protein P0-like					Phosphoserine							b-Adrenergic Receptor kinase substrate motif;Casein kinase II substrate motif;G protein-coupled receptor kinase 1 substrate motif;PKA kinase substrate motif;PKC kinase substrate motif	0.999965	1.92947e-11	154.26	138.14	136.2	-0.45778	UID1042
73	P05412;P17535	73;100	P05412	P05412	Transcription factor AP-1;Transcription factor jun-D	JUN;JUND	SDLLTSPDVGLLKLASPELERLIIQSSNGHI		0.0313923	0.180352	0.513663	2.54615	1.67287	1.81051	1.11877	1.29564	NaN	1.98121	1.55064	1.18768	0.854361	0.664932	1.1746	0.940613	S	2	___1	Jun	Transcription factor AP-1;Transcription factor jun-D					Phosphoserine| by MAPK8 and PLK3	Greatly reduced ATF7-mediated transcriptional activity| when associated with A-63. Abolishes interaction with FBXW7| when associated with A-63| A-91 and A-93						Calmodulin-dependent protein kinase II substrate motif;Casein kinase II substrate motif;Chk1 kinase substrate motif;ERK1,2 kinase substrate motif;GSK-3, ERK1, ERK2, CDK5 substrate motif;PKA kinase substrate motif;PKC kinase substrate motif;WW domain binding motif	1	7.3448e-09	172.98	103.38	85.355	-1.0821	UID1043	CDK3;VRK1;JNK2;JNK1;PBK;PLK3;ERK7
63	P05412	63	P05412	P05412	Transcription factor AP-1	JUN	SLKPHLRAKNSDLLTSPDVGLLKLASPELER		0.00691385	0.0864186	0.73059	3.48227	0.931507	0.578352	0.712679	0.87508	0.547667	1.31178	0.473429	0.455816	-0.122465	-0.499073	0.170225	NaN	S	2	___1	Jun	Transcription factor AP-1					Phosphoserine| by MAPK8 and PLK3	Greatly reduced ATF7-mediated transcriptional activity| when associated with A-73. Abolishes interaction with FBXW7| when associated with A-73| A-91 and A-93						ERK1,2 kinase substrate motif;GSK-3, ERK1, ERK2, CDK5 substrate motif;WW domain binding motif	0.999999	3.72537e-36	303.7	262.27	299.25	-0.24134	UID1044	CDK3;VRK1;PRKD1;JNK2;JNK1;PBK;PLK3;ERK7
92	P05455;E9PGX9;E7ERC4;E9PFL9	92;41;92;92	P05455	P05455	Lupus La protein	SSB	AELMEISEDKTKIRRSPSKPLPEVTDEYKND		0.306202	0.617545	0.193888	1.08482	-0.546576	-0.784924	-0.564518	-0.94721	-0.399597	-0.22485	-0.288513	-0.739939	-1.01552	-1.1488	-0.666393	NaN	S	2	___1		Lupus La protein				HTH La-type RNA-binding								Casein kinase II substrate motif;Cdc2 kinase substrate motif;CDK kinase substrate motif;CDK1,2,4,6 kinase substrate motif;ERK1,2 kinase substrate motif;G protein-coupled receptor kinase 1 substrate motif;Growth associated histone HI kinase substrate motif;GSK-3, ERK1, ERK2, CDK5 substrate motif;PKA kinase substrate motif;PKC kinase substrate motif;WW domain binding motif	0.880244	0.00125916	82.55	69.594	82.55	0.67896	UID1046
[truncated: 1,275 more rows]
[truncated: 3 more columns]

## Sheet: phospho_quantitative
Position	Proteins	Positions within proteins	Leading proteins	Protein	Protein names	Gene names	Sequence window	Student's T-test p-value DIA_WT	Student's T-test q-value DIA_WT	Student's T-test Difference DIA_WT	Student's T-test Test statistic DIA_WT	Intensity DIA1	Intensity DIA2	Intensity DIA3	Intensity DIA4	Intensity DIA5	Intensity DIA6	Intensity WT1	Intensity WT2	Intensity WT3	Intensity WT4	Intensity WT5	Intensity WT6	Amino acid	Charge	Multiplicity	Pfam domains	chain	coiled-coil region	compositionally biased region	cross-link	domain	modified residue	mutagenesis site	region of interest	sequence variant	short sequence motif	splice variant	topological domain	Motifs	Localization prob	PEP	Score	Delta score	Score for localization	Mass error [ppm]	Unique identifier	PhosphoSitePlus kinase	PhosphoSitePlus kinase uniprot
[truncated: 49 more rows]
[truncated: 2 more columns]

[truncated: 5 more sheets: phospho_qualititative, global_min4inEachGroup, global_quantitative, global_qualititative, README]
