# Supplementary material for: Phosphoproteomic insights into processes influenced by the kinase-like protein DIA1/C3orf58
Source: PeerJ. 2018 Apr 9;6:e4599. doi: 10.7717/peerj.4599 (PMC5896498; doi:10.7717/peerj.4599)
Supplement: Supplemental Information 5 — MaxQuant results for the proteomic comparative analysis between DIA1-overexpressing and control samples. [file peerj-06-4599-s005.xlsx]

## Sheet: interact_min3inEachGroup_Ttest
Entry	Protein IDs	Majority protein IDs	Protein names	Gene names	Student's T-test Significant DIA_WT	Student's T-test p-value DIA_WT	Student's T-test q-value DIA_WT	Student's T-test Difference DIA_WT	Student's T-test Test statistic DIA_WT	LFQ intensity 1_5_DIA	LFQ intensity 1_7_DIA	LFQ intensity 2_5_DIA	LFQ intensity 2_7_DIA	LFQ intensity 1_5_WT	LFQ intensity 1_7_WT	LFQ intensity 2_5_WT	LFQ intensity 2_7_WT	Peptides	Razor + unique peptides	Unique peptides	Sequence coverage [%]	Unique + razor sequence coverage [%]	Unique sequence coverage [%]	Mol. weight [kDa]	Q-value	Score	MS/MS count
E7EX40	E7EX40;Q6WKZ4	E7EX40;Q6WKZ4	Rab11 family-interacting protein 1	RAB11FIP1	+	6.52751e-05	0	-4.25465	-9.79232	-1.47461	-2.50331	-2.19415	-1.7561	2.29325	1.23387	2.63594	2.92736	9	9	8	24.4	24.4	22	54.832	0	97.159	42
O14828	O14828	O14828	Secretory carrier-associated membrane protein 3	SCAMP3	+	0.000139954	0	-3.42992	-8.55529	-2.01768	-2.67059	-2.65315	-2.44209	1.51068	-0.0188713	0.864855	1.57948	6	6	6	19.9	19.9	19.9	38.287	0	63.468	29
P56945	P56945;H3BN62;H3BVF0;H3BSY4;H3BQJ7;H3BSB2	P56945	Breast cancer anti-estrogen resistance protein 1	BCAR1	+	0.000143083	0	-3.47832	-8.52158	-0.995876	-1.88873	-1.59483	-1.41222	2.3765	1.10386	1.77611	2.76515	10	10	10	18.4	18.4	18.4	93.371	0	99.077	42
J3KQ96	J3KQ96;E7ETY2;Q13428;H0YA99;H0YAB7	J3KQ96;E7ETY2;Q13428	Treacle protein	TCOF1	+	0.000167982	0	-2.24361	-8.28039	0.504707	-0.000627518	0.617376	-0.00630951	2.74675	1.87674	2.73441	2.73171	17	17	17	15.1	15.1	15.1	144.12	0	132.23	61
O15127	O15127;H3BV04;H3BN93;H3BUB6;H3BPL9	O15127	Secretory carrier-associated membrane protein 2	SCAMP2	+	0.000208271	0	-3.23051	-7.9664	-2.51431	-2.121	-2.2089	-2.3212	1.70232	0.0351429	1.49812	0.521051	3	3	3	13.7	13.7	13.7	36.648	0	62.899	21
A0A0B4J220	A0A0B4J220;E9PLD3;E9PRG8	A0A0B4J220;E9PLD3;E9PRG8	Uncharacterized protein C11orf98	C11orf98	+	0.000412123	0	-1.11855	-7.03516	-1.14513	-1.57516	-1.58805	-1.04865	-0.247295	-0.168468	-0.0604572	-0.406574	3	3	3	22.8	22.8	22.8	14.234	0	19.192	15
A0A1B0GTL5	A0A1B0GTL5;Q9BXF6	A0A1B0GTL5;Q9BXF6	Rab11 family-interacting protein 5	RAB11FIP5	+	0.000480901	0	-3.58472	-10.4102	-2.06779	NaN	-2.39512	-2.7253	1.58962	NaN	1.34461	0.631712	6	6	6	8.2	8.2	8.2	138.41	0	54.572	16
Q15084	Q15084	Q15084	Protein disulfide-isomerase A6	PDIA6	+	0.000574607	0	1.55379	7.74203	-0.574757	-0.809454	-1.25679	-0.633518	-2.39995	NaN	-2.52938	-2.18793	4	4	4	13.4	13.4	13.4	48.121	0	28.458	17
P04843	P04843;B7Z4L4;F8WF32	P04843;B7Z4L4	Dolichyl-diphosphooligosaccharide--protein glycosyltransferase subunit 1	RPN1	+	0.000755324	0	2.57073	6.28457	2.1546	1.19967	1.23126	1.87237	-0.95417	-1.81516	-0.863935	-0.191736	13	13	13	26.2	26.2	26.2	68.569	0	128.27	48
E5RJU9	E5RJU9;Q86UE4;H0YB56	E5RJU9;Q86UE4;H0YB56	Protein LYRIC	MTDH	+	0.000785615	0	1.66607	7.23816	0.44109	-0.441994	-0.067709	-0.148754	-1.69146	NaN	-1.57987	-1.88989	6	6	6	13.7	13.7	13.7	57.521	0	36.734	15
Q9UQ35	Q9UQ35;I3L1I8;I3L182;I3L4D8;I3L1C0;A0A087X1W1	Q9UQ35	Serine/arginine repetitive matrix protein 2	SRRM2	+	0.000847827	0	2.6424	6.14885	3.18244	2.02181	2.61874	2.72795	0.384098	-1.02928	0.0598984	0.566637	15	15	15	8.1	8.1	8.1	299.61	0	129.76	62
G3V210	G3V210;F8VU65;F8VWS0;Q8NHW5;P05388;F8VQY6;F8VPE8;F8VRK7;F8VW21;F8VWV4;F8VS58;F8VZS0	G3V210;F8VU65;F8VWS0;Q8NHW5;P05388;F8VQY6;F8VPE8;F8VRK7;F8VW21;F8VWV4;F8VS58;F8VZS0	60S acidic ribosomal protein P0-like;60S acidic ribosomal protein P0	RPLP0;RPLP0P6	+	0.000848366	0	1.30427	6.14811	-0.251833	-0.530102	0.132925	0.228092	-1.51892	-1.56198	-1.05416	-1.50295	5	5	5	33.1	33.1	33.1	18.27	0	32.455	21
Q9BVP2	Q9BVP2;C9JZT7;B4DMU5;C9JYH9	Q9BVP2	Guanine nucleotide-binding protein-like 3	GNL3	+	0.000851236	0	-2.30734	-6.14418	2.46235	1.80166	1.4562	2.03381	4.59115	3.52996	3.95307	4.90917	19	19	19	37.7	37.7	37.7	61.992	0	184.37	212
C9JEJ2	C9JEJ2;P49585;C9J050;C9J2E1;H7C1T3;C9JPY0;H7BZN1;C9JVS0;F8WAZ5;Q9Y5K3;F8WBU2	C9JEJ2;P49585;C9J050;C9J2E1;H7C1T3	Choline-phosphate cytidylyltransferase A	PCYT1A	+	0.000877553	0	-2.16922	-6.10881	1.4509	0.227125	0.617765	0.642122	3.01341	2.34659	2.7415	3.51328	14	14	14	40.8	40.8	40.8	43.263	0	108.95	76
P17987	P17987;E7EQR6;F5H282;E7ERF2;F5GZI8;F5H726;F5H676;F5H136;F5GYL4	P17987;E7EQR6;F5H282	T-complex protein 1 subunit alpha	TCP1	+	0.000883352	0	2.4686	6.10118	1.10505	1.00709	0.50256	1.43124	-1.22752	-2.50424	-1.18465	-0.912035	11	11	10	23.9	23.9	21.4	60.343	0	81.267	32
A0A0D9SEW3	A0A0D9SEW3;A0A087WXF8;Q9NP64;A0A087WYV3;A0A087WXU5;A0A087WYF0	A0A0D9SEW3;A0A087WXF8;Q9NP64;A0A087WYV3;A0A087WXU5	Nucleolar protein of 40 kDa	ZCCHC17	+	0.000887942	0	-2.23399	-6.09518	1.6218	0.915033	0.572807	0.673595	3.60081	2.5889	2.8175	3.71198	10	10	10	35.8	35.8	35.8	27.994	0	72.87	99
Q9Y3C1	Q9Y3C1;D6RIC3;A0A0C4DGU5;A0A087X2G6;D6RC60	Q9Y3C1;D6RIC3;A0A0C4DGU5;A0A087X2G6	Nucleolar protein 16	NOP16	+	0.000928633	0	-1.68316	-6.04349	-0.747637	-1.17307	-1.05928	-0.784084	1.28109	0.105757	0.566423	1.01529	8	8	8	37.1	37.1	37.1	21.188	0	52.184	20
Q8NDZ4	Q8NDZ4;E7ET39;C9JY09	Q8NDZ4	Deleted in autism protein 1	C3orf58	+	0.00108354	0.00355556	7.90112	5.86807	6.24879	5.10997	6.25128	6.76462	-2.75434	-4.40275	1.75012	-1.82285	37	37	37	53.7	53.7	53.7	49.481	0	307.61	282
F5GYV5	F5GYV5;H7BZV4;A0A0C4DG62;F8WCT1;F5H7X4;Q66PJ3	F5GYV5;H7BZV4;A0A0C4DG62;F8WCT1;F5H7X4;Q66PJ3	ADP-ribosylation factor-like protein 6-interacting protein 4	ARL6IP4	+	0.00152194	0.00715789	2.45753	5.495	0.907465	-0.250187	0.0301075	0.336668	-1.56215	-3.20372	-2.32258	-1.71762	3	3	3	17.5	17.5	17.5	23.687	0	64.948	15
P08708	P08708;H0YN88;A0A075B716;H0YN73;H3BNC9	P08708;H0YN88;A0A075B716	40S ribosomal protein S17	RPS17	+	0.00179375	0.0098	-1.50982	-5.32084	1.63836	0.637657	0.699276	1.51996	2.78256	2.454	2.4579	2.84007	7	7	7	60	60	60	15.55	0	90.998	110
P40227	P40227;Q92526	P40227	T-complex protein 1 subunit zeta	CCT6A	+	0.0020905	0.012381	1.74205	5.16207	1.09741	0.87904	0.777937	1.40954	-1.08053	-1.33427	-0.387749	-0.00171471	9	9	9	23.4	23.4	23.4	58.024	0	60.128	26
P78371	P78371;F5GWF6;F8VQ14	P78371;F5GWF6;F8VQ14	T-complex protein 1 subunit beta	CCT2	+	0.00347703	0.0225455	1.58946	5.19654	1.86109	0.888969	1.30139	1.55801	-0.553522	NaN	-0.218445	0.210686	11	11	11	31.2	31.2	31.2	57.488	0	86.594	55
P62269	P62269;J3JS69;A0A0G2JQH2;Q5GGW2	P62269;J3JS69	40S ribosomal protein S18	RPS18	+	0.00349662	0.0215652	-0.842171	-4.65194	1.99883	2.19596	2.35739	1.83177	2.60367	2.81653	3.11615	3.21629	10	10	10	44.1	44.1	44.1	17.718	0	95.819	107
P62753	P62753;A2A3R5;A2A3R7	P62753;A2A3R5	40S ribosomal protein S6	RPS6	+	0.0043735	0.0276667	-1.12171	-4.4405	1.94163	2.25454	2.1612	2.96866	3.7603	3.51532	3.21148	3.32576	11	11	11	33.7	33.7	33.7	28.68	0	84.124	110
Q6Y7W6	Q6Y7W6;I1E4Y6;E7ESB6;C9JHW1;C9JH18;C9J0V6;C9JHT0;C9JRZ2;F8WCD5;C9JPV7;C9JXQ0;C9JH78;C9IYH5;C9JW88;C9J7G1;B8ZZD2;REV__A8MUV4	Q6Y7W6;I1E4Y6;E7ESB6	PERQ amino acid-rich with GYF domain-containing protein 2	GIGYF2	+	0.00437401	0.02656	2.09119	4.44039	4.47013	3.53816	4.80581	5.14154	2.37603	1.50478	2.76898	2.94107	39	39	39	32.3	32.3	32.3	150.07	0	323.31	257
J3KNN5	J3KNN5;Q9UJV9;H0Y8L8;D6RGI7;H0YA06	J3KNN5;Q9UJV9	Probable ATP-dependent RNA helicase DDX41	DDX41	+	0.00450992	0.0255385	-1.65166	-4.41194	1.49457	0.392021	0.868437	0.92675	2.73752	1.95815	2.26475	3.32801	13	13	13	23.1	23.1	23.1	71.648	0	96.465	69
P55084	P55084;F5GZQ3;B5MD38;C9K0M0;C9JEY0;C9JE81	P55084;F5GZQ3;B5MD38	Trifunctional enzyme subunit beta, mitochondrial;3-ketoacyl-CoA thiolase	HADHB	+	0.00482144	0.029037	1.98206	4.35022	0.759514	0.152958	1.30438	1.97857	-0.833765	-1.49354	-1.05279	-0.352737	7	7	7	17.7	17.7	17.7	51.294	0	54.621	19
P49368	P49368;B4DUR8;Q5SZX6;E9PRC8;Q5SZX9;E9PQ35;E9PM09;Q5SZW8	P49368;B4DUR8	T-complex protein 1 subunit gamma	CCT3	+	0.00508401	0.028	1.3475	4.75454	0.868099	0.883751	0.537424	1.26243	-0.864985	NaN	-0.55555	0.0418205	11	11	11	24.4	24.4	24.4	60.533	0	76.311	32
Q96AG4	Q96AG4;I3L223	Q96AG4	Leucine-rich repeat-containing protein 59	LRRC59	+	0.00612275	0.0333793	1.82939	4.13353	3.18147	2.53061	2.18128	2.95793	0.49999	0.196442	0.888054	1.94926	9	9	9	33.6	33.6	33.6	34.93	0	84.442	60
Q9P258	Q9P258	Q9P258	Protein RCC2	RCC2	+	0.00712557	0.0408	-1.05461	-4.38434	0.568426	-0.334286	0.118099	0.218904	1.37257	NaN	1.2416	0.978016	7	7	7	14.4	14.4	14.4	56.084	0	43.826	29
Q07065	Q07065	Q07065	Cytoskeleton-associated protein 4	CKAP4	+	0.00804966	0.0445161	1.5866	4.25546	-0.169403	-0.237642	-1.3187	-1.26709	-2.35886	NaN	-2.31179	-2.33378	7	7	7	15.3	15.3	15.3	66.022	0	46.793	13
P67809	P67809;H0Y449;C9J5V9;Q9Y2T7	P67809;H0Y449	Nuclease-sensitive element-binding protein 1	YBX1	+	0.00986933	0.043125	1.33338	3.71854	2.14276	1.69464	2.49318	2.25926	1.02495	-0.0754948	0.889149	1.41772	11	11	7	41	41	29.6	35.924	0	151.03	65
Q96PK6	Q96PK6	Q96PK6	RNA-binding protein 14	RBM14		0.010655	0.0500606	0.972015	3.65403	1.21998	0.332499	1.43344	1.15356	0.334888	-0.0279102	-0.185802	0.130239	8	8	8	15.4	15.4	15.4	69.491	0	64.466	29
X6RLJ0	X6RLJ0;P02745	X6RLJ0;P02745	Complement C1q subcomponent subunit A	C1QA		0.0114502	0.0514118	-0.935058	-3.89645	0.679493	-0.11157	-0.0520115	-0.14303	1.03643	NaN	0.899786	1.14862	1	1	1	5	5	5	23.351	0	7.2146	10
P50990	P50990;H7C4C8;H7C2U0	P50990;H7C4C8	T-complex protein 1 subunit theta	CCT8		0.0123596	0.0531429	1.72023	3.53054	1.31179	1.29139	1.27612	1.60862	-0.583981	-1.55038	0.0248756	0.716476	16	16	16	30.5	30.5	30.5	59.62	0	101.44	45
Q15233	Q15233;H7C367;C9JYS8;C9IZL7;C9J4X2;C9JJ13	Q15233;H7C367;C9JYS8	Non-POU domain-containing octamer-binding protein	NONO		0.0127307	0.0516667	1.92068	3.50616	4.1678	2.98772	4.8235	4.79259	2.76577	1.47378	1.9435	2.90586	22	21	21	39.3	37.6	37.6	54.231	0	192.8	210
Q86UK7	Q86UK7;H3BQQ2;H3BR87	Q86UK7;H3BQQ2	Zinc finger protein 598	ZNF598		0.0133669	0.0534054	1.95911	3.46613	2.99503	1.78342	3.19205	3.52382	1.02495	-0.256319	1.16075	1.72848	22	22	22	26.7	26.7	26.7	98.636	0	172.46	99
P60866	P60866;E5RIP1;E5RJX2;G3XAN0	P60866;E5RIP1;E5RJX2	40S ribosomal protein S20	RPS20		0.0142891	0.0564211	-0.543731	-3.41168	0.427174	0.179375	0.0271587	0.239351	0.750486	0.404966	0.829723	1.06281	3	3	3	22.7	22.7	22.7	13.373	0	23.14	37
O60884	O60884;I3L320;A0A087WT48	O60884	DnaJ homolog subfamily A member 2	DNAJA2		0.0144714	0.0566154	1.95366	3.40138	0.447069	0.772406	0.3981	2.11561	-0.821913	-2.02884	-1.17561	-0.0550957	9	9	9	23.8	23.8	23.8	45.745	0	73.843	24
P31689	P31689	P31689	DnaJ homolog subfamily A member 1	DNAJA1		0.0155026	0.0615	3.1351	3.34566	2.24729	2.09937	2.13514	3.94749	-0.303194	-2.28866	-1.13789	1.61863	18	18	18	55.4	55.4	55.4	44.868	0	169.45	93
P07900	P07900;Q14568;G3V2J8;Q58FG0	P07900	Heat shock protein HSP 90-alpha	HSP90AA1		0.0163884	0.0670244	2.3052	3.30095	2.78277	1.98252	3.74792	4.07389	0.661909	-0.473043	1.22376	1.95367	22	22	13	31.7	31.7	19.9	84.659	0	236.86	115
J3KPS3	J3KPS3;P04075;H3BQN4;H3BPS8;H3BUH7;H3BR04;H3BMQ8;H3BU78;H3BR68	J3KPS3;P04075;H3BQN4;H3BPS8;H3BUH7;H3BR04	Fructose-bisphosphate aldolase;Fructose-bisphosphate aldolase A	ALDOA		0.0169332	0.0654286	0.915022	3.27476	1.6868	1.35385	1.15335	1.59886	0.575459	-0.187777	0.803528	0.941549	13	13	13	38.6	38.6	38.6	39.817	0	104.03	55
P50991	P50991;P05543	P50991	T-complex protein 1 subunit delta	CCT4		0.0184686	0.0714419	1.26509	3.43833	0.591471	0.534782	0.586933	1.12139	-1.25753	NaN	-0.517311	0.105515	8	7	7	17.6	17.6	17.6	57.924	0	52.737	27
P02786	P02786;F8WBE5;G3V0E5	P02786;F8WBE5;G3V0E5	Transferrin receptor protein 1;Transferrin receptor protein 1, serum form	TFRC		0.0187646	0.0698182	-2.08036	-3.19302	-3.33779	-2.61715	-3.03798	-3.00388	-1.87023	-0.411772	-2.03288	0.639523	4	4	4	7.1	7.1	7.1	84.87	0	33.44	8
E9PL01	E9PL01;A0A087WUC6;E9PI68;Q15005;E9PRB9;H0YE04	E9PL01;A0A087WUC6;E9PI68;Q15005;E9PRB9	Signal peptidase complex subunit 2	SPCS2		0.0197256	0.0682667	2.08959	3.3776	0.256729	-2.03502	0.0449543	-0.638365	-2.59006	NaN	-2.55945	-2.89802	4	4	4	38.2	38.2	38.2	17.027	0	25.937	16
P62266	P62266;D6RD47;D6R9I7;D6RIX0;D6RDJ2	P62266;D6RD47;D6R9I7	40S ribosomal protein S23	RPS23		0.021221	0.0762609	-1.16329	-3.09613	4.97382	4.38702	4.08175	4.85026	6.64891	5.45249	5.23524	5.60938	21	21	21	64.3	64.3	64.3	15.807	0	176.11	326
P40939	P40939;H0YFD6	P40939	Trifunctional enzyme subunit alpha, mitochondrial;Long-chain enoyl-CoA hydratase;Long chain 3-hydroxyacyl-CoA dehydrogenase	HADHA		0.0219896	0.0799149	2.12758	3.27856	-1.24823	-2.04799	0.173973	-0.0103893	-2.48462	NaN	-3.06095	-3.18665	7	7	7	11.3	11.3	11.3	82.999	0	41.871	12
P11021	P11021	P11021	78 kDa glucose-regulated protein	HSPA5		0.0222822	0.07825	1.29235	3.058	2.2978	1.2573	2.08052	2.15025	0.732737	-0.329021	0.878893	1.33387	15	14	14	26.6	26.6	26.6	72.332	0	103.31	70
P23246	P23246;H0Y9K7;H0Y9U2	P23246	Splicing factor, proline- and glutamine-rich	SFPQ		0.0238731	0.0894694	1.52864	3.00437	3.81795	3.36066	4.60715	4.91188	2.28591	1.80423	3.3623	3.13064	25	25	24	36.1	36.1	34.9	76.149	0	221.47	217
P62854	P62854;Q5JNZ5	P62854;Q5JNZ5	40S ribosomal protein S26;Putative 40S ribosomal protein S26-like 1	RPS26;RPS26P11		0.0259521	0.09504	-1.57617	-2.93987	2.52578	1.88762	1.21617	1.3728	4.48934	2.91886	2.40237	3.49651	5	5	5	42.6	42.6	42.6	13.015	0	39.767	73
B7ZAR1	B7ZAR1;E9PCA1;P48643;E7ENZ3	B7ZAR1;E9PCA1;P48643;E7ENZ3	T-complex protein 1 subunit epsilon	CCT5		0.0269101	0.0981961	1.49315	2.912	-0.766012	0.241472	-0.899591	0.511284	-1.48503	-2.78611	-1.54686	-1.06745	7	7	7	15.3	15.3	15.3	55.348	0	46.671	19
O75396	O75396;A0A087X1A9	O75396	Vesicle-trafficking protein SEC22b	SEC22B		0.0277042	0.0975385	1.3396	2.8897	-0.905716	-2.26686	-2.04367	-0.88604	-3.11558	-3.54883	-2.42377	-2.37249	5	5	5	25.1	25.1	25.1	24.593	0	31.769	11
P16403	P16403;P16402;Q02539;P16401;P22492	P16403;P16402	Histone H1.2;Histone H1.3	HIST1H1C;HIST1H1D		0.0283836	0.0968302	-1.02311	-2.87117	5.60548	5.56439	5.46105	4.89978	7.22937	5.97617	6.57024	5.84736	33	33	6	54.9	54.9	19.7	21.364	0	271.5	454
P25705	P25705;K7ERX7;K7EK77;K7EJP1;K7EQH4;K7ENJ4;K7ESA0	P25705;K7ERX7;K7EK77;K7EJP1	ATP synthase subunit alpha, mitochondrial	ATP5A1		0.0284901	0.095037	1.20796	2.86831	1.00085	0.7034	1.17547	1.65107	-0.189957	-1.04368	0.222862	0.709734	10	10	10	22.6	22.6	22.6	59.75	0	74.829	39
E9PRR7	E9PRR7;Q14331;E9PLY7	E9PRR7;Q14331	Protein FRG1	FRG1		0.0291669	0.0959273	-1.44724	-3.32775	NaN	-2.36862	-2.07287	-1.52988	-0.147532	-1.25974	NaN	-0.222385	3	3	3	31	31	31	12.516	0	20.864	13
Q99832	Q99832;F8WAM2	Q99832	T-complex protein 1 subunit eta	CCT7		0.0292432	0.0942143	1.45552	2.84839	-0.814495	0.336451	-0.767584	0.802435	-1.44694	-2.27539	-1.76237	-0.780584	7	7	7	15.1	15.1	15.1	59.366	0	47.514	18
P08238	P08238;Q58FF7;Q58FF6;F8W026;Q96GW1;A0A1W2PRR1;P14625	P08238	Heat shock protein HSP 90-beta	HSP90AB1		0.0296793	0.0952982	2.05396	2.83711	0.771599	0.239023	2.00278	2.77876	-0.715076	-1.77171	-0.200701	0.263803	22	13	9	33.4	21.5	15.6	83.263	0	119.15	45
O43663	O43663;G3V3N7;H0YLA0;H0YM42;H0YL53	O43663	Protein regulator of cytokinesis 1	PRC1		0.030311	0.0945517	-0.946894	-2.82108	0.144939	-0.0372562	-0.552204	-0.112633	1.43922	0.159149	0.448643	1.18341	8	8	8	17.6	17.6	17.6	71.606	0	62.573	19
P26583	P26583;D6R9A6;Q5T7C4;B2RPK0;P09429	P26583;D6R9A6	High mobility group protein B2	HMGB2		0.0316584	0.0976271	-0.554877	-2.95618	-0.873306	-0.963493	-0.339113	-0.512016	-0.278687	NaN	-0.0577812	-0.0148468	4	4	4	18.2	18.2	18.2	24.033	0	25.205	16
Q15836	Q15836;K7ENK9;K7EKX0;J3QRU4;F8WCA0;L7N2F9;P63027	Q15836;K7ENK9;K7EKX0;J3QRU4;F8WCA0;L7N2F9;P63027	Vesicle-associated membrane protein 3;Vesicle-associated membrane protein 2	VAMP3;VAMP2		0.0340374	0.1022	-2.37838	-2.73329	-3.42767	-3.84987	-3.5748	-2.92429	-1.70607	-3.11681	-0.16481	0.724583	2	2	2	33	33	33	11.309	0	24.886	6
P62249	P62249;M0R3H0;M0R210;Q6IPX4;M0R1M5;M0QX76	P62249;M0R3H0;M0R210;Q6IPX4	40S ribosomal protein S16	RPS16		0.0358981	0.102754	-0.485583	-2.69323	1.40939	1.15792	1.00263	0.690886	1.7203	1.26526	1.64044	1.57717	7	7	7	47.3	47.3	47.3	16.445	0	46.319	67
O60573	O60573;C9JEL3;B9A044;B8ZZ50;B8ZZL3;B4E1E4;B9A023	O60573;C9JEL3;B9A044;B8ZZ50;B8ZZL3	Eukaryotic translation initiation factor 4E type 2	EIF4E2		0.0368185	0.103097	2.44517	2.67423	2.48147	1.00051	2.33431	3.85253	0.200943	-2.05058	0.551048	1.18675	12	12	12	47.3	47.3	47.3	28.362	0	83.539	66
Q8TA86	Q8TA86;C9J6V2	Q8TA86;C9J6V2	Retinitis pigmentosa 9 protein	RP9		0.0402295	0.110286	-1.30981	-2.60798	2.23134	0.400448	1.47251	0.927015	3.47087	2.02709	2.47204	2.30055	7	7	7	39.4	39.4	39.4	26.106	0	59.162	120
P62081	P62081;B5MCP9	P62081;B5MCP9	40S ribosomal protein S7	RPS7		0.0448932	0.12275	-0.80892	-2.52647	2.47245	3.11584	1.80561	2.52106	3.18193	3.46669	2.84888	3.65314	17	17	17	49.5	49.5	49.5	22.127	0	111.99	132
P63173	P63173;J3KT73;J3QL01;J3KSP2	P63173;J3KT73;J3QL01	60S ribosomal protein L38	RPL38		0.0450339	0.120862	-1.10093	-2.52415	2.12055	1.15677	1.14598	1.34751	3.18633	1.89327	1.91169	3.18323	6	6	6	52.9	52.9	52.9	8.2178	0	38.449	100
P62244	P62244;I3L3P7;I3L246;H3BN98;H3BV27;H3BT37;I3L303;H3BVC7	P62244;I3L3P7;I3L246;H3BN98	40S ribosomal protein S15a	RPS15A		0.0462503	0.122485	-1.04251	-2.50443	0.563519	-0.0495319	0.221199	1.45169	1.38646	1.15084	1.48569	2.33391	6	6	6	47.7	47.7	47.7	14.839	0	38.263	46
O00488	O00488;A9J4F5	O00488	Zinc finger protein 593	ZNF593		0.0513841	0.137791	-1.19041	-2.42682	-0.458584	-1.41035	-1.24009	-2.60325	-0.237923	-0.793066	-0.144043	0.224392	3	3	3	18.7	18.7	18.7	15.199	0	23.725	13
Q9BU76	Q9BU76	Q9BU76	Multiple myeloma tumor-associated protein 2	MMTAG2		0.0522899	0.138941	-1.14897	-2.41398	6.10942	4.77341	5.08468	5.29921	7.3652	5.5035	6.45262	6.54128	21	21	21	53.2	53.2	53.2	29.411	0	197.47	359
P62241	P62241;Q5JR95	P62241;Q5JR95	40S ribosomal protein S8	RPS8		0.0546015	0.14371	-0.915841	-2.38223	2.5324	1.89633	1.83013	2.09308	3.15507	2.04219	3.09528	3.72275	12	12	12	52.9	52.9	52.9	24.205	0	161.57	110
E9PKP7	E9PKP7;P17480;E9PLT2	E9PKP7;P17480;E9PLT2	Nucleolar transcription factor 1	UBTF		0.0563571	0.146971	0.911145	2.4725	-0.234396	-0.529476	-0.39703	-1.01095	-1.00054	NaN	-2.19065	-1.17113	4	4	4	8.5	8.5	8.5	87.435	0	27.281	10
O14654	O14654	O14654	Insulin receptor substrate 4	IRS4		0.0567922	0.144901	1.69061	2.35342	2.98067	1.06094	2.50877	2.06299	1.38994	-1.22382	0.535975	1.14882	19	19	19	21	21	21	133.77	0	162.97	70
Q15907	Q15907;H3BMH2;H3BSC1;P62491;B4DQU5;M0R2D0	Q15907;H3BMH2;H3BSC1;P62491;B4DQU5	Ras-related protein Rab-11B;Ras-related protein Rab-11A	RAB11B;RAB11A		0.0572648	0.145	-1.89464	-2.45949	-2.20448	-2.2122	-2.10559	-1.37038	-0.854475	NaN	-1.04919	1.66809	6	6	6	35.3	35.3	35.3	24.488	0	39.532	7
E7ETK0	E7ETK0;A0A087WUS0;P62847	E7ETK0;A0A087WUS0;P62847	40S ribosomal protein S24	RPS24		0.0573206	0.143014	-1.07043	-2.34665	2.25135	1.25582	1.54748	2.08993	3.13587	1.81075	2.8014	3.67828	4	4	4	29.8	29.8	29.8	15.197	0	30.867	76
Q5JYR7	Q5JYR7;P04844;Q5JYR4	Q5JYR7;P04844;Q5JYR4	Dolichyl-diphosphooligosaccharide--protein glycosyltransferase subunit 2	RPN2		0.0576715	0.141784	1.15749	2.63849	-1.01215	NaN	-0.0878258	-1.44175	-1.64806	NaN	-2.12586	-2.24028	2	2	2	7.6	7.6	7.6	37.109	0	12.462	6
A0A087WTT1	A0A087WTT1;E7EQV3;P11940;E7ERJ7;H0YAR2;Q9H361;H0YAP2;H0YB86;H0YBN4;Q4VXU2;H0YC10;E5RGH3;E5RH24;E5RJB9;H0YAS7;H0YAS6;H0YB75;H0YEQ8;B1ANR1;H0YCC8;H0YEU6;Q96DU9	A0A087WTT1;E7EQV3;P11940;E7ERJ7;H0YAR2;Q9H361	Polyadenylate-binding protein;Polyadenylate-binding protein 1;Polyadenylate-binding protein 3	PABPC1;PABPC3		0.0589479	0.14256	1.35527	2.32618	1.63027	1.00996	2.18728	2.58856	0.534851	-0.840334	1.05857	1.24193	15	15	12	28.9	28.9	22	58.535	0	103.35	57
Q5JP53	Q5JP53;P07437;Q5ST81;G3V2A3;M0R1I1;G3V5W4;G3V2R8;G3V3R4;G3V2N6;G3V3J6;G3V3W7	Q5JP53;P07437;Q5ST81	Tubulin beta chain	TUBB		0.0621648	0.151842	1.17406	2.28741	3.53512	3.12403	2.99972	3.94024	1.8815	1.31489	2.19023	3.51626	29	6	5	62.9	15	11.5	47.766	0	65.699	167
Q8N5F7	Q8N5F7;Q5M9Q1	Q8N5F7	NF-kappa-B-activating protein	NKAP		0.0647257	0.151429	-0.995097	-2.258	1.4338	0.358936	0.466541	0.384117	2.22844	0.895597	1.20027	2.29948	7	7	7	19	19	19	47.138	0	49.508	54
P62829	P62829;J3KT29;C9JD32;B9ZVP7;J3KTJ3;J3QQT9	P62829;J3KT29;C9JD32;B9ZVP7	60S ribosomal protein L23	RPL23		0.0660505	0.152667	-0.713012	-2.24326	5.00013	4.4899	4.24591	5.17105	6.08932	4.9876	5.28181	5.4003	21	21	21	71.4	71.4	71.4	14.865	0	180.55	422
Q53EL6	Q53EL6;Q5VZS7	Q53EL6;Q5VZS7	Programmed cell death protein 4	PDCD4		0.0664275	0.151089	-2.00812	-2.33943	-2.19657	NaN	-2.51604	-2.26027	-1.13526	-1.93197	0.82267	0.979885	6	6	6	22.4	22.4	22.4	51.735	0	35.588	13
P15927	P15927;Q5TEJ0;Q5TEJ7	P15927;Q5TEJ0	Replication protein A 32 kDa subunit	RPA2		0.0677841	0.15355	-1.67407	-2.48586	-1.37394	NaN	-1.39417	-0.192368	0.21876	0.0715103	NaN	1.77147	3	3	3	17.8	17.8	17.8	29.247	0	23.49	12
Q9NZI8	Q9NZI8	Q9NZI8	Insulin-like growth factor 2 mRNA-binding protein 1	IGF2BP1		0.0680473	0.15279	0.917347	2.22161	0.254295	-1.09793	-0.157166	0.539913	-0.814022	-1.45096	-1.30009	-0.565199	5	5	4	11.4	11.4	9.2	63.48	0	33.022	19
Q92522	Q92522	Q92522	Histone H1x	H1FX		0.0686279	0.150927	-0.693803	-2.21543	-0.327364	-0.216831	-1.04824	-0.446234	0.338547	0.818642	-0.324755	-0.0958862	4	4	4	23	23	23	22.487	0	25.857	25
E9PR30	E9PR30;P62861;E9PM49	E9PR30;P62861	40S ribosomal protein S30	FAU		0.0705353	0.153108	-1.01978	-2.19553	4.70761	3.3871	3.98907	3.67866	5.55816	3.88737	5.16942	5.22662	5	5	5	20.4	20.4	20.4	10.905	0	33.511	83
B4DFG0	B4DFG0;P35659;D6RDA2;H0Y993;H0Y8X0;D6R9L5	B4DFG0;P35659;D6RDA2;H0Y993;H0Y8X0	Protein DEK	DEK		0.0731981	0.159429	-0.412687	-2.26167	NaN	-1.23783	-1.28157	-1.00168	-1.01193	-0.922462	-0.736458	-0.373173	4	4	4	13.8	13.8	13.8	39.5	0	23.139	8
P50914	P50914;E7EPB3	P50914;E7EPB3	60S ribosomal protein L14	RPL14		0.0852202	0.177976	1.18866	2.05861	-2.09333	0.0760517	-1.77861	-0.291189	-2.28316	-2.78246	-1.90319	-1.87292	4	4	4	20.5	20.5	20.5	23.432	0	24.912	16
J3KTA4	J3KTA4;P17844;J3KRZ1;J3QRQ7;J3QSF1;J3QR02;J3KRX8;X6RLV5;J3QRN5	J3KTA4;P17844	Probable ATP-dependent RNA helicase DDX5	DDX5		0.0852784	0.175907	0.430906	2.05812	1.97347	1.69096	1.9183	2.14939	1.55664	1.03244	1.47624	1.94317	19	12	12	32.7	23.1	23.1	69.086	0	96.478	48
P62805	P62805	P62805	Histone H4	HIST1H4A		0.08697	0.179172	-1.37849	-2.04393	4.01136	4.461	5.54975	4.18722	7.36682	4.5613	5.6863	6.10887	17	17	17	70.9	70.9	70.9	11.367	0	122.29	241
Q96EY1	Q96EY1;I3L1T6	Q96EY1	DnaJ homolog subfamily A member 3, mitochondrial	DNAJA3		0.088822	0.180864	0.862712	2.10822	0.735783	-0.151043	0.286951	0.623938	-0.511326	NaN	-1.16963	0.214542	7	7	7	18.3	18.3	18.3	52.488	0	46.159	30
P05204	P05204;O00479	P05204	Non-histone chromosomal protein HMG-17	HMGN2		0.09044	0.181213	1.94557	2.01568	-1.18491	2.56704	0.00476074	0.0596371	-0.0296078	-1.53836	-2.4458	-2.32198	6	6	6	45.6	45.6	45.6	9.3926	0	35.253	15
G3V4C6	G3V4C6;Q9Y224;H0YJB9;G3V4E7	G3V4C6;Q9Y224;H0YJB9	UPF0568 protein C14orf166	C14orf166		0.0913506	0.180622	1.00149	2.2127	-1.80196	NaN	-0.994703	-0.419733	-2.13095	NaN	-2.40548	-1.68445	3	3	3	20.7	20.7	20.7	22.703	0	21.423	4
P78347	P78347;A0A087WW90;A0A0D9SF80;A0A0A0MSY2;Q86UP8;Q6EKJ0	P78347	General transcription factor II-I	GTF2I		0.0931335	0.181978	0.783184	2.0709	-0.664633	-0.800634	0.407351	-0.167631	-1.48637	NaN	-0.680862	-1.10148	4	4	4	6.1	6.1	6.1	112.42	0	28.384	14
P61247	P61247;H0Y9Y4;D6RG13;D6RAT0;E9PFI5;D6R9B6;H0Y8L7;D6RB09;D6RAS7;D6RI02;D6RED7;D6RGE0	P61247;H0Y9Y4;D6RG13;D6RAT0;E9PFI5;D6R9B6;H0Y8L7;D6RB09	40S ribosomal protein S3a	RPS3A		0.0933446	0.180391	-0.655517	-1.99287	1.15493	0.75898	1.4831	1.70379	2.45537	1.24643	1.87967	2.14138	9	9	9	36.7	36.7	36.7	29.945	0	58.197	40
E9PB61	E9PB61;Q86V81	E9PB61;Q86V81	THO complex subunit 4	ALYREF		0.0971042	0.187785	-0.661465	-1.96438	0.72138	0.55735	0.706251	1.26992	1.06611	1.06014	2.32744	1.44707	8	8	8	37.1	37.1	37.1	27.557	0	64.765	58
A0A0A0MRK1	A0A0A0MRK1;E9PAV9;Q5T3I0;F8W895	A0A0A0MRK1;E9PAV9;Q5T3I0;F8W895	G patch domain-containing protein 4	GPATCH4		0.10491	0.199362	-0.640197	-1.97752	-2.37281	-2.84997	-2.52954	-2.20182	-1.84559	NaN	-2.42868	-1.27074	3	3	3	10.3	10.3	10.3	42.054	0	17.972	3
V9GYY5	V9GYY5;Q9UGY1	V9GYY5;Q9UGY1	Nucleolar protein 12	NOL12		0.105208	0.197853	-0.8953	-1.90657	-1.26604	-2.13809	-1.66808	-1.81869	0.449444	-1.12386	-1.48192	-1.15335	3	3	3	18.9	18.9	18.9	23.82	0	20.503	10
Q15424	Q15424;K7ES42;Q14151	Q15424;K7ES42;Q14151	Scaffold attachment factor B1;Scaffold attachment factor B2	SAFB;SAFB2		0.107508	0.203458	-0.736204	-2.06772	NaN	-1.93396	-2.45797	-1.29732	-1.22271	NaN	-0.930117	-1.32781	2	2	2	3.4	3.4	3.4	102.64	0	10.695	3
Q08211	Q08211	Q08211	ATP-dependent RNA helicase A	DHX9		0.108432	0.20433	0.68866	1.8848	-1.10106	-0.57021	-0.00476074	0.250523	-1.24466	-1.4143	-1.05363	-0.467552	7	7	7	7.9	7.9	7.9	140.96	0	62.974	17
Q9Y265	Q9Y265;H7C4G5;J3QLR1;E7ETR0	Q9Y265;H7C4G5	RuvB-like 1	RUVBL1		0.110645	0.207469	0.604719	1.93594	-1.33929	NaN	-0.853802	-0.337929	-1.12285	-1.87801	-1.53574	-1.25697	6	6	6	17.3	17.3	17.3	50.227	0	33.662	8
H7C4H2	H7C4H2;Q9Y5M8	H7C4H2;Q9Y5M8	Signal recognition particle receptor subunit beta	SRPRB		0.110769	0.205374	1.01721	1.93507	0.132498	-0.666786	-0.953733	-1.84843	-2.17989	NaN	-1.36993	-2.00414	5	5	5	33.8	33.8	33.8	17.502	0	31.633	8
H7BY10	H7BY10;K7ERT8;A8MUS3;P62750;K7EJV9;K7EMA7	H7BY10;K7ERT8;A8MUS3;P62750;K7EJV9;K7EMA7	60S ribosomal protein L23a	RPL23A		0.112815	0.20488	-0.722887	-1.85621	3.54502	3.00633	2.61728	3.38894	3.75311	3.67844	3.22961	4.78796	18	18	18	59.5	59.5	59.5	17.692	0	123.21	134
P62701	P62701;C9JEH7;P22090;Q8TD47	P62701;C9JEH7;P22090;Q8TD47	40S ribosomal protein S4, X isoform;40S ribosomal protein S4, Y isoform 1;40S ribosomal protein S4, Y isoform 2	RPS4X;RPS4Y1;RPS4Y2		0.114301	0.206614	-0.592339	-1.84677	3.03965	2.00268	2.38408	2.77258	3.22024	2.76709	2.82827	3.75275	16	16	16	56.3	56.3	56.3	29.597	0	112.43	128
P68371	P68371;P04350;M0R2D3;M0QY85;M0QZL7;M0R278;M0R0X0;M0QY37;M0QX14;M0R042;M0QYM7;A0A075B724;M0R2T4	P68371;P04350	Tubulin beta-4B chain;Tubulin beta-4A chain	TUBB4B;TUBB4A		0.126019	0.227647	1.347	1.77631	5.3249	4.45617	4.92449	6.39647	3.45574	2.56247	4.11759	5.57824	30	30	3	64	64	7.4	49.83	0	323.31	456
P19474	P19474;H0YDP8	P19474	E3 ubiquitin-protein ligase TRIM21	TRIM21		0.128236	0.229359	-0.63518	-1.7637	-0.406408	-0.649183	-0.488918	0.210951	0.0574913	-0.398579	0.514839	1.03341	8	8	8	20	20	20	54.169	0	60.197	30
Q8ND56	Q8ND56;A0A0G2JQ95;A0A096LP11;A0A140TA66;A0A140TA76	Q8ND56	Protein LSM14 homolog A	LSM14A		0.131493	0.233846	1.63569	1.74558	-2.13849	-2.71634	0.759346	0.129763	-2.24013	-3.79935	-2.02089	-2.44813	5	5	5	14.5	14.5	14.5	50.529	0	33.801	17
P11142	P11142;E9PKE3;E9PN89;E9PNE6;E9PLF4;E9PQQ4;E9PQK7;E9PK54;A8K7Q2;E9PPY6;E9PN25;E9PI65;P54652;E9PS65;E9PM13	P11142;E9PKE3;E9PN89;E9PNE6;E9PLF4	Heat shock cognate 71 kDa protein	HSPA8		0.138624	0.242171	0.913181	1.70736	2.56324	2.24439	2.58905	3.38465	1.68545	0.739368	1.65205	3.05174	22	22	19	40.7	40.7	37.3	70.897	0	204.63	122
A0A087X0X3	A0A087X0X3;P52272;M0QZM1;M0R019;M0R2I7;M0R2T0;M0QY96;M0R0Y6;M0QYL3;M0QYQ7;M0R0N3	A0A087X0X3;P52272;M0QZM1	Heterogeneous nuclear ribonucleoprotein M	HNRNPM		0.140011	0.242189	0.933525	1.70015	3.09484	2.57981	3.44759	3.23379	2.37617	0.661194	2.55099	3.03358	20	20	20	35.1	35.1	35.1	77.569	0	176.51	136
A0A0U1RQH7	A0A0U1RQH7;H0Y4X3;G3XAC6;Q14498;A0A0U1RQW2;Q5QP23;A0A087X122;Q5QP22	A0A0U1RQH7;H0Y4X3;G3XAC6;Q14498;A0A0U1RQW2	RNA-binding protein 39	RBM39		0.144117	0.247028	-0.635167	-1.6792	0.0126457	-0.268581	-0.375086	0.0477619	1.20184	0.209908	-0.400675	0.946339	5	5	5	28.2	28.2	28.2	26.698	0	38.622	42
P83731	P83731;C9JXB8;C9JNW5	P83731;C9JXB8;C9JNW5	60S ribosomal protein L24	RPL24		0.145043	0.245296	-0.640313	-1.67456	2.83942	2.23432	2.11716	2.70169	3.28313	2.25884	3.01397	3.8979	8	8	8	37.6	37.6	37.6	17.779	0	52.039	94
P23396	P23396;E9PPU1;H0YEU2;E9PL09;F2Z2S8;H0YF32;H0YCJ7;E9PQ96;E9PJH4;E9PK82;E9PSF4;H0YES8;E9PQX2	P23396;E9PPU1;H0YEU2;E9PL09;F2Z2S8;H0YF32;H0YCJ7	40S ribosomal protein S3	RPS3		0.153693	0.261028	-0.533267	-1.63251	1.08063	0.433914	0.995459	1.32349	1.34787	0.859091	2.13828	1.62133	8	8	8	44.4	44.4	44.4	26.688	0	55.135	50
D6REM6	D6REM6;A0A0R4J2E8;A8MXP9;P43243;D6R991;B3KM87;Q68E03;H0Y8T4;D6RB45;A0A1B0GX04;D6R9F3;D6RAM9;D6RAY2;D6RBS2;D6RCM3;D6REK4;D6R8Z5;D6RBI2;D6RBK5;D6RE02;D6RIA2	D6REM6;A0A0R4J2E8;A8MXP9;P43243;D6R991	Matrin-3	MATR3		0.154571	0.259236	-0.672749	-1.62837	-0.478048	0.965546	0.594341	0.0418854	1.47367	0.579182	1.34295	0.418921	8	8	8	13.2	13.2	13.2	88.358	0	54.514	29
X1WI28	X1WI28;P27635;Q96L21;B8A6G2;A6QRI9	X1WI28;P27635;Q96L21	60S ribosomal protein L10;60S ribosomal protein L10-like	RPL10;RPL10L		0.158643	0.263568	-0.659086	-1.60945	3.3075	2.36463	2.79279	3.53562	4.04785	2.96615	3.30815	4.31472	16	16	2	62	62	8.5	22.975	0	121.52	183
P27694	P27694;I3L4R8	P27694;I3L4R8	Replication protein A 70 kDa DNA-binding subunit;Replication protein A 70 kDa DNA-binding subunit, N-terminally processed	RPA1		0.160941	0.261786	-1.26567	-1.59898	-2.57435	-2.98841	-2.52461	-2.07876	-1.75499	-2.10533	-2.25398	1.01084	4	4	4	8.6	8.6	8.6	68.137	0	32.504	7
P27824	P27824;H0Y9Q7;D6RGY2;D6RFL1;H0Y9H1;D6RAQ8;D6RAU8;D6RB85;D6RDP7	P27824	Calnexin	CANX		0.17381	0.289558	1.22139	1.58505	0.344238	0.701818	0.895458	2.26449	-1.47282	NaN	0.0206337	0.942509	10	10	10	19.6	19.6	19.6	67.567	0	68.827	43
P22626	P22626;A0A087WUI2	P22626;A0A087WUI2	Heterogeneous nuclear ribonucleoproteins A2/B1	HNRNPA2B1		0.176781	0.291474	-0.597009	-1.53045	2.01	3.22253	2.9848	3.58989	4.0261	3.22731	3.70987	3.23199	14	14	13	44.2	44.2	41.9	37.429	0	155.64	183
P38432	P38432	P38432	Coilin	COIL		0.178717	0.291165	-1.35901	-1.56343	NaN	-3.95031	-3.87002	-3.202	-2.70719	-3.76116	-2.44598	-0.346077	2	2	2	3.8	3.8	3.8	62.608	0	12.488	2
Q8NE71	Q8NE71;Q5STZ8;H0YGW7;F5GYK6;A0A0G2JIC2	Q8NE71;Q5STZ8	ATP-binding cassette sub-family F member 1	ABCF1		0.18303	0.296862	-0.636414	-1.505	-1.19509	-1.55391	-1.87513	-1.21801	-0.632984	-1.51262	-1.35057	0.199699	5	5	5	7.2	7.2	7.2	95.925	0	31.505	8
P46776	P46776;E9PLL6;E9PJD9;E9PLX7	P46776;E9PLL6;E9PJD9	60S ribosomal protein L27a	RPL27A		0.185468	0.298496	-0.743321	-1.49529	3.57845	1.93749	2.80922	2.95995	4.07455	2.70116	3.22968	4.25301	7	7	7	38.5	38.5	38.5	16.561	0	46.428	92
Q2NL82	Q2NL82;I3L1Q5	Q2NL82	Pre-rRNA-processing protein TSR1 homolog	TSR1		0.185942	0.295966	-1.13648	-1.53262	-2.13283	NaN	-2.26975	-1.89615	-1.68914	-1.9118	-1.07758	0.826143	5	5	5	7.3	7.3	7.3	91.809	0	34.65	7
P68363	P68363;P68366;C9JDS9	P68363;P68366	Tubulin alpha-1B chain;Tubulin alpha-4A chain	TUBA1B;TUBA4A		0.188873	0.296874	0.993919	1.48192	5.59804	4.90864	4.9623	6.38455	4.31645	3.26506	4.26015	6.0362	26	26	2	61.4	61.4	3.1	50.151	0	317.75	384
P62277	P62277;J3KMX5;E9PS50	P62277;J3KMX5	40S ribosomal protein S13	RPS13		0.191485	0.3011	-0.454214	-1.47182	2.36927	1.67986	1.79509	2.26813	2.43219	1.86761	2.5049	3.1245	8	8	8	39.1	39.1	39.1	17.222	0	57.801	70
A0A0C4DFV9	A0A0C4DFV9;Q01105;A0A087X027;P0DME0	A0A0C4DFV9;Q01105;A0A087X027;P0DME0	Protein SET;Protein SETSIP	SET;SETSIP		0.192638	0.300661	-1.08798	-1.5051	0.295561	-2.34229	-0.46871	-0.210184	0.0363617	NaN	0.208965	0.974386	3	3	3	15.8	15.8	15.8	31.124	0	22.291	13
P36578	P36578;H3BM89;H3BTP7;H3BU31	P36578;H3BM89	60S ribosomal protein L4	RPL4		0.196613	0.30259	0.654256	1.45236	2.00453	1.87571	2.06822	2.49034	1.4619	0.342644	1.57711	2.44012	15	15	15	42.2	42.2	42.2	47.697	0	114.66	58
A6NLN1	A6NLN1;A0A0U1RRM4;P26599;A0A0D9SF20;K7EKJ7;A0A087WUW5;K7ELW5;K7ES59;K7EK45;O95758;X6R242;A0A087WU68	A6NLN1;A0A0U1RRM4;P26599	Polypyrimidine tract-binding protein 1	PTBP1		0.196978	0.300553	1.02567	1.45099	-0.133993	1.20477	0.373524	2.23026	0.263151	-1.18696	-0.537481	1.03318	9	9	9	23	23	23	56.51	0	59.948	40
P42167	P42167;G5E972;P42166;H0YJH7	P42167;G5E972;P42166	Lamina-associated polypeptide 2, isoforms beta/gamma;Thymopoietin;Thymopentin;Lamina-associated polypeptide 2, isoform alpha;Thymopoietin;Thymopentin	TMPO		0.201788	0.303645	-0.506076	-1.43318	1.26316	0.939966	1.33991	0.95109	2.25169	0.669453	1.78295	1.81434	10	10	10	30.4	30.4	30.4	50.67	0	86.424	60
Q6P1L8	Q6P1L8	Q6P1L8	39S ribosomal protein L14, mitochondrial	MRPL14		0.206292	0.312096	-0.791412	-1.45172	-0.816906	-1.91613	-2.60546	-1.73788	-0.469467	NaN	-1.74714	-0.716442	3	3	3	26.2	26.2	26.2	15.947	0	18.208	9
A0A087WXM6	A0A087WXM6;J3QQT2;J3KRX5;A0A0A6YYL6;P18621;J3QLC8;J3KRB3;A0A087WWH0;J3QS96;A0A0A0MRF8;A0A087WY81;J3KSJ0	A0A087WXM6;J3QQT2;J3KRX5;A0A0A6YYL6;P18621;J3QLC8;J3KRB3;A0A087WWH0;J3QS96;A0A0A0MRF8;A0A087WY81	60S ribosomal protein L17	RPL17;RPL17-C18orf32		0.215292	0.33273	-0.857742	-1.3852	4.39646	3.30262	3.76888	4.79725	5.24643	3.53225	4.8785	6.039	17	17	17	68.6	68.6	68.6	19.586	0	177.47	283
Q8NC51	Q8NC51;Q5JVS0	Q8NC51	Plasminogen activator inhibitor 1 RNA-binding protein	SERBP1		0.219423	0.336378	0.824088	1.37107	1.0082	0.134684	1.48956	1.49651	-0.463943	-0.846048	1.23134	0.911259	12	12	12	32.1	32.1	32.1	44.965	0	108.1	34
P62851	P62851	P62851	40S ribosomal protein S25	RPS25		0.219791	0.334656	-0.447012	-1.36982	2.26903	1.41475	1.91254	1.52825	2.30395	1.64618	2.90067	2.06182	5	5	5	31.2	31.2	31.2	13.742	0	54.253	70
P42677	P42677;Q5T4L4;C9J1C5	P42677;Q5T4L4	40S ribosomal protein S27	RPS27		0.22782	0.349798	-0.48238	-1.34308	4.24371	3.24864	3.57125	3.31956	4.67196	3.48891	3.73611	4.41571	5	5	3	39.3	39.3	14.3	9.461	0	33.078	109
A6NL93	A6NL93;A6NEL0;P05114	A6NL93;A6NEL0;P05114	Non-histone chromosomal protein HMG-14	HMGN1		0.228806	0.348277	2.60216	1.41935	NaN	-0.282806	-2.71891	-0.114635	-0.486668	-4.51294	-5.92323	NaN	3	3	3	40	40	40	9.5355	0	20.612	16
A0A1X7SBZ2	A0A1X7SBZ2;A0A1W2PQ51;Q92841;A0A0U1RQJ0	A0A1X7SBZ2;A0A1W2PQ51;Q92841	Probable ATP-dependent RNA helicase DDX17	DDX17		0.230871	0.348977	0.458467	1.33313	1.59978	1.73151	2.00715	2.77254	1.9378	1.30967	1.07663	1.95301	19	17	12	29.8	27	20.4	80.253	0	162.68	76
P47914	P47914	P47914	60S ribosomal protein L29	RPL29		0.233297	0.349758	-0.571466	-1.32531	1.49648	0.227812	1.54106	0.524233	2.28904	1.42094	1.34335	1.02211	4	4	4	21.4	21.4	21.4	17.752	0	26.966	38
P05387	P05387;H0YDD8	P05387	60S acidic ribosomal protein P2	RPLP2		0.236454	0.354226	0.792942	1.31524	2.65354	1.44871	2.18172	2.27527	1.48919	0	1.22795	2.67034	7	7	7	49.6	49.6	49.6	11.665	0	64.336	75
P57053	P57053;O60814	P57053;O60814	Histone H2B type F-S;Histone H2B type 1-K	H2BFS;HIST1H2BK		0.239192	0.354716	2.15447	1.33579	-3.30515	2.29217	0.0133705	NaN	-1.05251	-3.725	-1.39451	-3.77866	19	2	0	67.5	13.5	0	13.944	0	19.074	20
E9PCY7	E9PCY7;G8JLB6;P31943;D6RIT2;H0YB39;D6RIU0;H0YBG7;H0YBD7;D6RBM0;E7EQJ0;D6RAM1;E5RGV0;D6R9T0;D6RFM3;D6RDU3;D6RJ04;D6RIH9;P55795;E5RGH4;E7EN40;D6RF17;D6RDL0;H0YAQ2;P52597;D6R9D3	E9PCY7;G8JLB6;P31943;D6RIT2;H0YB39;D6RIU0;H0YBG7;H0YBD7;D6RBM0	Heterogeneous nuclear ribonucleoprotein H;Heterogeneous nuclear ribonucleoprotein H, N-terminally processed	HNRNPH1		0.242857	0.356741	0.922211	1.29518	-0.718115	0.667416	0.60656	1.93267	-0.100378	-1.13844	-0.881046	0.919561	10	10	10	29.1	29.1	29.1	47.087	0	86.094	28
A0A0G2JIW1	A0A0G2JIW1;P0DMV9;P0DMV8;V9GZ37	A0A0G2JIW1;P0DMV9;P0DMV8;V9GZ37	Heat shock 70 kDa protein 1B;Heat shock 70 kDa protein 1A	HSPA1B;HSPA1A		0.255892	0.378206	1.27511	1.25575	0.553091	0.656748	1.67422	2.96438	-0.0567837	-1.91053	0.522154	2.19316	14	13	7	26.3	24.3	13.1	70.108	0	90.88	47
A0A0A0MRA5	A0A0A0MRA5;B7Z4B8;Q9BUJ2;M0R203;M0QZV6;M0R0K8;M0QYZ0;M0R3F1;M0QYI8	A0A0A0MRA5;B7Z4B8;Q9BUJ2;M0R203;M0QZV6;M0R0K8;M0QYZ0;M0R3F1	Heterogeneous nuclear ribonucleoprotein U-like protein 1	HNRNPUL1		0.2605	0.383912	0.414972	1.26841	-0.846788	-1.42262	-0.256224	-0.519304	-1.06572	NaN	-1.49678	-0.96612	4	4	4	7.4	7.4	7.4	85.939	0	24.522	9
A0A024RCR6	A0A024RCR6;A0A0G2JK23;P46379;A0A0G2JL47;F6S6P2;X6REW1;A0A0G2JJM1;H0Y4L1;H0Y710	A0A024RCR6;A0A0G2JK23;P46379;A0A0G2JL47	Large proline-rich protein BAG6	BAT3;BAG6		0.26894	0.395855	-0.781901	-1.24311	0.0497475	-1.49531	0.0608921	1.07676	0.732449	NaN	0.768934	0.613388	7	7	7	9.7	9.7	9.7	118.7	0	45.856	17
Q16778	Q16778;P33778;P23527;Q8N257;Q6DRA6;Q6DN03	Q16778;P33778;P23527;Q8N257	Histone H2B type 2-E;Histone H2B type 1-B;Histone H2B type 1-O;Histone H2B type 3-B	HIST2H2BE;HIST1H2BB;HIST1H2BO;HIST3H2BB		0.272608	0.398158	-1.284	-1.23234	-0.586863	1.09339	1.28014	-0.822901	2.89062	NaN	-0.358723	2.04294	17	3	0	65.9	10.3	0	13.92	0	23.253	24
P62280	P62280;M0QZC5;M0R1H6;M0R1H5	P62280;M0QZC5	40S ribosomal protein S11	RPS11		0.275829	0.4016	-0.340749	-1.19872	2.89035	1.98057	2.56451	2.26079	3.34044	2.58838	2.38218	2.74822	11	11	11	46.8	46.8	46.8	18.431	0	85.514	95
P62913	P62913;Q5VVC9;Q5VVC8	P62913;Q5VVC9;Q5VVC8	60S ribosomal protein L11	RPL11		0.278546	0.405163	-0.535996	-1.19123	2.70645	1.72602	1.38217	1.78507	3.34037	2.20319	1.67011	2.53003	4	4	4	20.2	20.2	20.2	20.252	0	59.3	57
P62888	P62888;E5RI99;A0A0B4J213;A0A0C4DH44;E5RJH3	P62888;E5RI99;A0A0B4J213	60S ribosomal protein L30	RPL30		0.2799	0.403155	-0.50689	-1.2113	-0.893442	-1.15092	-1.10928	-0.107378	-0.577108	NaN	-0.759792	0.411806	5	5	5	58.3	58.3	58.3	12.784	0	32.63	12
O00264	O00264;U3KQM0;O15173	O00264	Membrane-associated progesterone receptor component 1	PGRMC1		0.283254	0.403636	0.689416	1.17839	0.620514	-0.369219	0.883524	1.66697	-0.306477	-0.956903	0.403486	0.904015	6	6	6	21.5	21.5	21.5	21.671	0	37.226	25
Q8WUH6	Q8WUH6	Q8WUH6	Transmembrane protein 263	TMEM263		0.291146	0.411667	-0.831681	-1.15728	-2.4657	-0.662912	0.227659	-0.308359	0.0473595	-1.14001	0.799843	0.410213	3	3	3	32.8	32.8	32.8	11.748	0	19.632	13
Q9Y3I0	Q9Y3I0	Q9Y3I0	tRNA-splicing ligase RtcB homolog	RTCB		0.294412	0.414538	0.605481	1.14868	0.667	-0.506754	1.08897	0.939632	0.111414	-1.11587	0.0540657	0.717318	9	9	9	21	21	21	55.21	0	58.661	34
H3BPE7	H3BPE7;P35637	H3BPE7;P35637	RNA-binding protein FUS	FUS		0.303706	0.429452	0.431563	1.12465	1.25623	0.769203	2.04123	2.16491	1.30831	0.544334	1.32936	1.32332	8	8	6	16.9	16.9	15.2	53.496	0	67.004	53
H0YHA7	H0YHA7;J3QQ67;Q07020;G3V203;F8VUA6;F8VYV2;A0A075B7A0	H0YHA7;J3QQ67;Q07020;G3V203;F8VUA6;F8VYV2;A0A075B7A0	60S ribosomal protein L18	RPL18		0.309986	0.438422	0.358342	1.10876	1.29759	0.84642	1.1896	1.1727	1.20972	0.0226574	0.506416	1.33414	7	7	7	44.3	44.3	44.3	18.863	0	54.285	44
F8W6I7	F8W6I7;P09651;F8VZ49;Q32P51;F8W646;H0YH80;F8VTQ5;F8VYN5	F8W6I7;P09651;F8VZ49;Q32P51;F8W646;H0YH80	Heterogeneous nuclear ribonucleoprotein A1;Heterogeneous nuclear ribonucleoprotein A1, N-terminally processed;Heterogeneous nuclear ribonucleoprotein A1-like 2	HNRNPA1;HNRNPA1L2		0.31003	0.435459	0.339361	1.10865	2.00959	2.57831	2.48552	2.8451	2.74257	1.69288	2.36709	1.75853	10	9	8	35.2	35.2	31.6	33.155	0	84.26	54
P06576	P06576;H0YH81;F8W079	P06576;H0YH81	ATP synthase subunit beta, mitochondrial;ATP synthase subunit beta	ATP5B		0.335009	0.474201	0.579653	1.048	0.837883	0.309984	0.744205	1.86626	-0.074316	-0.601273	0.682592	1.43272	5	5	5	15.9	15.9	15.9	56.559	0	35.344	23
Q02878	Q02878;F8VZ45;U3KQR5;F8VZA3;F8VWR1;F8VU16;F8VR69	Q02878	60S ribosomal protein L6	RPL6		0.343159	0.485413	0.461411	1.02901	2.33554	1.60003	2.10707	1.96304	1.59787	0.365211	1.8534	2.34356	14	14	14	32.6	32.6	32.6	32.728	0	96.594	68
P35241	P35241	P35241	Radixin	RDX		0.354445	0.502702	-0.71397	-1.02017	0.450323	-1.58496	-0.260727	-0.171139	-0.404348	NaN	-0.0913105	1.46269	9	9	6	17.2	17.2	12.2	68.563	0	56.256	17
P23284	P23284	P23284	Peptidyl-prolyl cis-trans isomerase B	PPIB		0.37452	0.536868	-0.835809	-0.959154	-1.23723	1.05955	0.855726	1.74334	-0.194304	1.50253	1.88494	2.57145	8	8	8	40.7	40.7	40.7	23.742	0	62.926	60
P51991	P51991;H7C1J8	P51991	Heterogeneous nuclear ribonucleoprotein A3	HNRNPA3		0.3784	0.538379	0.419075	0.950837	-1.72516	0.144156	-0.831121	-0.140652	-1.06723	-1.37147	-1.1203	-0.670084	6	4	4	18	15.1	15.1	39.594	0	66.333	20
P04406	P04406;E7EUT5	P04406;E7EUT5	Glyceraldehyde-3-phosphate dehydrogenase	GAPDH		0.378888	0.536234	0.647713	0.949796	0.350843	1.54457	1.66972	2.34786	0.395187	-0.386131	1.16769	2.14539	9	9	9	39.4	39.4	39.4	36.053	0	69.612	49
M0R0F0	M0R0F0;P46782;M0R0R2;M0QZN2	M0R0F0;P46782;M0R0R2;M0QZN2	40S ribosomal protein S5;40S ribosomal protein S5, N-terminally processed	RPS5		0.379816	0.533368	-0.519392	-0.947817	2.0052	1.08826	1.71817	2.10616	2.53995	0.786812	3.01664	2.65195	9	9	9	43.5	43.5	43.5	22.391	0	105.31	109
E9PKZ0	E9PKZ0;P62917;E9PP36;G3V1A1;E9PKU4	E9PKZ0;P62917;E9PP36;G3V1A1;E9PKU4	60S ribosomal protein L8	RPL8		0.381185	0.531564	0.357767	0.959911	1.19952	0.585369	1.36441	0.870571	1.15467	NaN	-0.07728	0.864214	2	2	2	13.2	13.2	13.2	22.389	0	16.885	17
Q00839	Q00839;A0A1W2PP35;A0A1W2PPS1;Q5RI18;A0A1X7SBS1;A0A1W2PRZ7;A0A1W2PQ74;A0A1W2PQL0;A0A1W2PP34;A0A1W2PPL4;A0A1W2PPH7;A0A1W2PQD4;A0A1W2PPE9;A0A1W2PRI6;A0A1W2PP22	Q00839;A0A1W2PP35;A0A1W2PPS1;Q5RI18;A0A1X7SBS1;A0A1W2PRZ7;A0A1W2PQ74;A0A1W2PQL0;A0A1W2PP34;A0A1W2PPL4;A0A1W2PPH7;A0A1W2PQD4	Heterogeneous nuclear ribonucleoprotein U	HNRNPU		0.381418	0.528178	0.344609	0.944413	1.86793	1.46651	2.31174	2.158	2.12447	0.74016	1.55284	2.00827	10	10	10	16.4	16.4	16.4	90.583	0	89.997	58
D6R9P3	D6R9P3;D6RD18;D6RBZ0;Q99729	D6R9P3;D6RD18;D6RBZ0;Q99729	Heterogeneous nuclear ribonucleoprotein A/B	HNRNPAB		0.383419	0.527139	0.27514	0.940176	-0.804819	0.245005	-0.111883	0.340759	-0.669292	-0.253881	-0.465567	-0.042757	3	3	3	13.9	13.9	13.9	30.302	0	21.377	24
Q15365	Q15365	Q15365	Poly(rC)-binding protein 1	PCBP1		0.389973	0.532604	-0.902471	-0.940863	-1.80218	-3.17739	-1.5893	0.146723	-1.17194	NaN	-1.4627	0.52544	5	3	3	23.6	14.9	14.9	37.497	0	20.045	9
P46783	P46783;Q9NQ39;F6U211;A0A1W2PQS6	P46783;Q9NQ39	40S ribosomal protein S10;Putative 40S ribosomal protein S10-like	RPS10;RPS10P5		0.393815	0.533325	-0.41381	-0.932642	-0.746035	-1.89505	-0.736818	-0.537262	-1.15516	NaN	-0.364107	-0.175676	3	3	3	14.5	14.5	14.5	18.898	0	20.797	20
F6S8N6	F6S8N6;A0A0A0MRJ6;H7BY58;P22061;F8WDT3;F8WAV5;F8WAX2;H7C4X2	F6S8N6;A0A0A0MRJ6;H7BY58;P22061;F8WDT3;F8WAV5;F8WAX2	Protein-L-isoaspartate O-methyltransferase;Protein-L-isoaspartate(D-aspartate) O-methyltransferase	PCMT1		0.394361	0.531453	-0.192843	-0.93148	-1.46267	-1.93138	-1.6202	-1.54165	-1.12964	NaN	-1.81736	-1.39139	4	4	4	20.8	20.8	20.8	26.626	0	27.465	10
P39019	P39019;M0R2L9;A0A075B6E2;M0QXK4;M0QYF7;M0R140	P39019;M0R2L9;A0A075B6E2;M0QXK4;M0QYF7;M0R140	40S ribosomal protein S19	RPS19		0.396006	0.530346	-0.274187	-0.913904	0.474302	-0.354223	0.677273	0.591536	0.554035	0.21706	1.10629	0.608246	8	8	8	44.8	44.8	44.8	16.06	0	54.443	35
E9PPJ0	E9PPJ0;Q13435;E9PJ04;H0YCG1;E9PJT3;E9PIL8	E9PPJ0;Q13435;E9PJ04;H0YCG1;E9PJT3	Splicing factor 3B subunit 2	SF3B2		0.401362	0.536245	-0.450178	-0.937975	NaN	-2.52683	-0.902641	-1.59244	-1.25023	NaN	-1.37194	-1.04922	4	4	4	7.1	7.1	7.1	98.169	0	21.686	4
Q59GN2	Q59GN2;P62891	Q59GN2;P62891	Putative 60S ribosomal protein L39-like 5;60S ribosomal protein L39	RPL39P5;RPL39		0.404917	0.539439	-0.543126	-0.895692	4.79236	2.80592	3.44587	3.70871	5.08995	3.00351	4.56195	4.26994	3	3	3	25.5	25.5	25.5	6.3225	0	19.824	85
P08670	P08670;B0YJC4;B0YJC5;A0A1B0GTT5;A0A1B0GVG8;A0A1W2PRT3;K7EMP8;A0A1X7SBR3;A0A1W2PR46;P14136;P17661;H7C5W5;F8W835;K7EJU1;A0A1X7SCE1;E7EMV2;E7ESP9;P41219;Q16352;P07196;P07197;P12036	P08670;B0YJC4	Vimentin	VIM		0.409422	0.543685	0.631147	0.886599	2.17648	2.02371	2.81699	3.26942	1.49607	0.378586	2.48112	3.40623	25	25	25	49.1	49.1	49.1	53.651	0	191.98	119
F1T0B3	F1T0B3;A0A087X2G1;Q92499	F1T0B3;A0A087X2G1;Q92499	ATP-dependent RNA helicase DDX1	DDX1		0.423843	0.558843	0.460128	0.889822	-0.650784	NaN	-0.756134	0.517002	-1.19351	NaN	-0.93819	-0.138597	3	3	3	8.3	8.3	8.3	73.915	0	25.607	18
P07195	P07195;F5H5G7;F5H155;A8MW50;A0A087WUM2;G3XAP5;F5H245;Q6ZMR3;P07864;P00338	P07195;F5H5G7;F5H155;A8MW50;A0A087WUM2;G3XAP5;F5H245;Q6ZMR3;P07864;P00338	L-lactate dehydrogenase B chain;L-lactate dehydrogenase;L-lactate dehydrogenase A-like 6A;L-lactate dehydrogenase C chain;L-lactate dehydrogenase A chain	LDHB;LDHC;LDHAL6A;LDHA		0.424702	0.555737	0.87716	0.888024	NaN	-3.59775	-3.09405	-0.67054	-2.84092	-4.12182	-3.03108	NaN	2	2	2	6.6	6.6	6.6	36.638	0	13.814	4
Q96P11	Q96P11;Q63ZY6;Q3KNT7	Q96P11;Q63ZY6	Probable 28S rRNA (cytosine-C(5))-methyltransferase;Putative methyltransferase NSUN5C	NSUN5;NSUN5P2		0.425825	0.554857	-0.634915	-0.885678	-1.8856	NaN	-2.21241	-1.47457	-1.3385	-2.34574	NaN	0.0164089	3	3	3	10.3	10.3	10.3	46.691	0	18.029	4
A0A087WUK2	A0A087WUK2;O14979	A0A087WUK2;O14979	Heterogeneous nuclear ribonucleoprotein D-like	HNRNPDL		0.428093	0.556592	0.257967	0.849692	-1.76728	-0.806358	-1.49634	-0.75803	-1.32644	-1.86665	-1.5895	-1.07728	5	5	5	19.3	19.3	19.3	40.04	0	32.735	7
Q8IWS0	Q8IWS0;A0A0D9SGE8;Q5JRC6	Q8IWS0;A0A0D9SGE8;Q5JRC6	PHD finger protein 6	PHF6		0.4339	0.563082	-0.345278	-0.838457	2.93021	1.43123	2.52388	2.06699	3.14937	1.93529	2.46588	2.7829	12	12	12	35.9	35.9	35.9	41.29	0	158.1	101
P20719	P20719;V9GYH0;I3L383;I3L3R1;P09629;Q00444;P17509;P31268;P31267;P09630;P31273;P17481;P17482;P31274;P09067;P28356	P20719	Homeobox protein Hox-A5	HOXA5		0.443036	0.575111	-0.331858	-0.821001	-1.35052	-2.05886	-1.11738	-2.02317	-0.329811	-1.70311	-1.54987	-1.6397	4	4	4	21.1	21.1	21.1	29.345	0	23.951	10
Q9Y2W1	Q9Y2W1	Q9Y2W1	Thyroid hormone receptor-associated protein 3	THRAP3		0.44309	0.572302	0.281417	0.820898	5.13114	4.20524	4.88803	5.22365	5.12569	3.91201	4.75024	4.53444	40	39	39	35.7	35.7	35.7	108.66	0	321.17	389
Q13724	Q13724;C9J8D4;B8ZZE2	Q13724;C9J8D4	Mannosyl-oligosaccharide glucosidase	MOGS		0.444938	0.571098	0.468032	0.828855	0.711657	-0.259296	0.377762	1.51509	-0.00171089	-0.554737	NaN	0.911259	7	7	7	13.4	13.4	13.4	91.916	0	51.967	29
X6R700	X6R700;Q9Y3Y2;A0A087X1B7;Q5T7Y7	X6R700;Q9Y3Y2;A0A087X1B7	Chromatin target of PRMT1 protein	CHTOP		0.451235	0.579816	-0.418557	-0.816715	-2.04115	-2.15861	-1.58255	NaN	-1.59056	-2.22278	-0.325876	-1.89631	3	3	3	18.8	18.8	18.8	23.661	0	18.684	7
A0A0C4DGK8	A0A0C4DGK8;G3V5M0;G3V359;G3V3C7;G3V5Q1;G3V3M6;P27695;H7C4A8;G3V5D9;G3V3Y6	A0A0C4DGK8;G3V5M0;G3V359;G3V3C7;G3V5Q1;G3V3M6;P27695;H7C4A8;G3V5D9	DNA-(apurinic or apyrimidinic site) lyase;DNA-(apurinic or apyrimidinic site) lyase, mitochondrial	APEX1		0.458716	0.585394	-0.545983	-0.802457	-2.07477	-1.58549	-0.982452	-0.124224	-1.58029	NaN	-0.697977	0.341013	4	4	4	41.1	41.1	41.1	15.938	0	32.776	11
H0YA96	H0YA96;H0Y8G5;Q14103;D6RAF8;D6RF44;D6RD83;D6RBQ9	H0YA96;H0Y8G5;Q14103;D6RAF8;D6RF44	Heterogeneous nuclear ribonucleoprotein D0	HNRNPD		0.460019	0.584432	0.47243	0.78923	-0.539642	0.208881	0.894815	1.83952	-0.321772	-0.37401	0.207502	1.00213	8	8	8	31.9	31.9	31.9	23.811	0	67.941	42
P49006	P49006	P49006	MARCKS-related protein	MARCKSL1		0.463271	0.58504	0.841938	0.793858	-2.87427	-2.40366	-0.0960846	0.679388	-1.52022	NaN	-2.63282	-1.89374	2	2	2	14.4	14.4	14.4	19.529	0	32.345	12
P62857	P62857	P62857	40S ribosomal protein S28	RPS28		0.48278	0.604697	0.277708	0.757722	1.02787	0.000627518	1.37366	1.01259	0.526052	0.384214	NaN	0.817675	3	3	3	46.4	46.4	46.4	7.8409	0	21.031	44
P62316	P62316;K7ERG4;K7EJB5	P62316;K7ERG4	Small nuclear ribonucleoprotein Sm D2	SNRPD2		0.492191	0.619933	-0.357316	-0.731239	-0.560333	-1.247	0.26421	0.52589	0.153166	-0.670801	0.314009	0.61566	5	5	5	48.3	48.3	48.3	13.527	0	33.234	16
E7EQR4	E7EQR4;P15311;V9GZ54;E9PQ82;E9PNV3	E7EQR4;P15311	Ezrin	EZR		0.492945	0.617889	-0.388126	-0.739309	-0.380594	-1.38221	-1.09815	-1.79482	-0.95417	NaN	-1.47754	0.104252	7	4	4	12.8	7.8	7.8	69.371	0	25.457	10
P61353	P61353;K7ELC7;K7EQQ9;K7ERY7	P61353;K7ELC7;K7EQQ9	60S ribosomal protein L27	RPL27		0.497845	0.619757	0.238165	0.721319	1.72314	0.951317	1.4776	1.00529	1.44249	0.353502	0.88586	1.52283	6	6	6	46.3	46.3	46.3	15.798	0	41.613	36
A0A087WTP3	A0A087WTP3;Q92945;M0R0I5;M0QYH3;M0QXW7;M0R3J3	A0A087WTP3;Q92945;M0R0I5	Far upstream element-binding protein 2	KHSRP		0.501128	0.623055	-0.244036	-0.715595	1.15129	0.979063	1.85963	1.7673	1.64378	0.988962	2.22846	1.87222	14	14	13	22.4	22.4	21.2	73.027	0	108.88	70
Q9Y3U8	Q9Y3U8;J3QSB5;J3KTD3	Q9Y3U8;J3QSB5;J3KTD3	60S ribosomal protein L36	RPL36		0.503285	0.62459	0.379177	0.711846	0.625095	-0.15115	0.950092	1.30791	0.535776	-0.976137	0.791763	0.863834	4	4	4	31.4	31.4	31.4	12.254	0	32.118	27
B1AHC9	B1AHC9;P12956	B1AHC9;P12956	X-ray repair cross-complementing protein 6	XRCC6		0.504608	0.623261	0.381388	0.709552	0.824587	-0.131506	0.623207	0.513666	0.734177	-1.31602	0.0467873	0.83946	7	7	7	14	14	14	64.283	0	44.249	20
B2R5W2	B2R5W2;G3V4C1;G3V4W0;B4DY08;G3V2Q1;P07910;G3V2D6;G3V576;G3V5V7;G3V555;G3V575;O60812;G3V5X6;G3V3K6;G3V251;A0A0G2JPF8;A0A0G2JNQ3;P0DMR1;B7ZW38;B2RXH8;B4DSU6;G3V4M8	B2R5W2;G3V4C1;G3V4W0;B4DY08;G3V2Q1;P07910;G3V2D6;G3V576;G3V5V7	Heterogeneous nuclear ribonucleoproteins C1/C2	HNRNPC		0.510048	0.62813	-0.285384	-0.700165	0.961643	2.25437	1.44021	2.2531	2.76869	1.6994	1.75228	1.83049	11	11	11	33.1	33.1	33.1	31.948	0	148.61	90
P84103	P84103;A0A087X2D0	P84103;A0A087X2D0	Serine/arginine-rich splicing factor 3	SRSF3		0.515484	0.63157	0.290826	0.690848	0.684795	0.549574	1.09	1.40006	1.52247	-0.0984707	0.155724	0.981403	5	5	4	30.5	30.5	22	19.329	0	68.654	41
P61313	P61313;E7EX53;E7EQV9;E7ENU7	P61313;E7EX53;E7EQV9	60S ribosomal protein L15;Ribosomal protein L15	RPL15		0.5173	0.630781	-0.247006	-0.696254	-0.0957699	-0.720894	0.0913868	-0.562172	-0.0275078	NaN	-0.662689	0.46563	5	5	5	29.4	29.4	29.4	24.146	0	32.656	21
H0Y5B4	H0Y5B4;H7BZ11;J3KQN4;P83881;R4GN19;H7BY91;H0Y3V9	H0Y5B4;H7BZ11;J3KQN4;P83881;R4GN19	60S ribosomal protein L36a	RPL36A;RPL36A-HNRNPH2		0.525873	0.634277	0.767553	0.673223	-0.314171	3.68974	1.7032	3.19917	3.0251	1.63295	0.863184	-0.313517	10	10	2	40.2	40.2	8.9	13.228	0	67.764	73
Q8WVC2	Q8WVC2;P63220;Q9BYK1	Q8WVC2;P63220;Q9BYK1	40S ribosomal protein S21	RPS21		0.538028	0.64819	-0.30771	-0.660696	-1.78856	-2.8112	-1.06585	-1.33905	-1.68822	NaN	-1.27211	-1.37004	2	2	2	23.5	23.5	23.5	8.85	0	12.647	8
Q06830	Q06830;A0A0A0MSI0;A0A0A0MRQ5	Q06830;A0A0A0MSI0;A0A0A0MRQ5	Peroxiredoxin-1	PRDX1		0.539594	0.648758	0.37821	0.658047	NaN	-1.84962	-1.60146	-0.0735703	-1.28421	-2.38406	-1.44603	-1.09808	4	4	4	26.6	26.6	26.6	22.11	0	24.046	6
P62424	P62424;Q5T8U3;Q5T8U2	P62424;Q5T8U3	60S ribosomal protein L7a	RPL7A		0.547215	0.655099	0.308875	0.637706	2.56927	0.990679	2.33546	1.88589	2.0536	0.635969	1.84538	2.01084	9	9	9	32.7	32.7	32.7	29.995	0	59.601	71
P06748	P06748;E5RI98;E5RGW4	P06748	Nucleophosmin	NPM1		0.564121	0.674375	0.161591	0.610183	1.53809	1.83974	1.61413	2.24188	1.33616	1.36866	2.2532	1.62947	9	9	9	30.3	30.3	30.3	32.575	0	81.184	86
B0QYK0	B0QYK0;Q01844;A0A0D9SFL3;C9JGE3;H7BY36	B0QYK0;Q01844;A0A0D9SFL3;C9JGE3;H7BY36	RNA-binding protein EWS	EWSR1		0.568784	0.679295	0.445255	0.602681	-0.780127	-0.81284	1.43889	1.15287	-0.633207	-1.1127	0.781771	0.181906	6	6	6	13.6	13.6	13.6	64.929	0	62.177	29
Q9Y5B9	Q9Y5B9	Q9Y5B9	FACT complex subunit SPT16	SUPT16H		0.570521	0.677938	-0.421319	-0.606732	-2.37119	-0.831627	-0.647741	-1.67272	0.240559	NaN	-1.37531	-1.74375	4	4	4	5.5	5.5	5.5	119.91	0	26.548	11
Q00688	Q00688;G3V5F2	Q00688	Peptidyl-prolyl cis-trans isomerase FKBP3	FKBP3		0.579282	0.689641	-0.329924	-0.592519	-1.56425	-0.892632	-0.176373	-0.0263672	-0.965015	NaN	-0.546759	0.506826	7	7	7	33	33	33	25.177	0	43.107	16
Q9NYF8	Q9NYF8;E9PK91;E9PK09;E9PQN2;E9PKI6;A0A1W2PQ43;E9PJA7;H0YF00;H0YF14;H0YF63	Q9NYF8;E9PK91;E9PK09;E9PQN2;E9PKI6;A0A1W2PQ43;E9PJA7	Bcl-2-associated transcription factor 1	BCLAF1		0.583179	0.69349	0.293436	0.579753	5.75438	4.30034	5.57755	5.48684	5.69029	4.01023	5.49165	4.7532	49	49	48	43.4	43.4	42.2	106.12	0	323.31	480
I3L397	I3L397;I3L504;P63241;Q6IS14;F8WCJ1;C9J7B5;C9J4W5;Q9GZV4	I3L397;I3L504;P63241;Q6IS14;F8WCJ1;C9J7B5;C9J4W5;Q9GZV4	Eukaryotic translation initiation factor 5A;Eukaryotic translation initiation factor 5A-1;Eukaryotic translation initiation factor 5A-1-like;Eukaryotic translation initiation factor 5A-2	EIF5A;EIF5AL1;EIF5A2		0.594801	0.708792	0.752496	0.567666	-0.383677	NaN	0.767912	1.31944	0.0602474	-3.04452	0.150023	2.09583	4	4	4	33.6	33.6	33.6	16.019	0	28.722	26
P38159	P38159;H0Y6E7;H3BT71;Q96E39;H3BR27;A0A1B0GUK8;H3BNC1;H3BUY5;O75526;Q8N7X1	P38159;H0Y6E7;H3BT71;Q96E39;H3BR27;A0A1B0GUK8	RNA-binding motif protein, X chromosome;RNA-binding motif protein, X chromosome, N-terminally processed;RNA binding motif protein, X-linked-like-1	RBMX;RBMXL1		0.597103	0.708162	-0.259133	-0.557892	-0.408749	0.701818	-0.180861	-0.450663	1.26116	-0.453129	-0.200098	0.0901508	6	6	6	19.7	19.7	19.7	42.331	0	39.082	20
P09874	P09874;Q5VX84;Q5VX85	P09874	Poly [ADP-ribose] polymerase 1	PARP1		0.607155	0.717688	-0.149301	-0.542292	4.78883	4.45346	4.50996	5.20259	4.78765	4.65868	4.58319	5.52252	46	46	46	43	43	43	113.08	0	323.31	423
P39748	P39748;I3L3E9;F5H1Y3	P39748;I3L3E9;F5H1Y3	Flap endonuclease 1	FEN1		0.612913	0.72072	-0.289448	-0.547879	-0.969994	NaN	-0.971943	-0.285522	-1.22064	NaN	-0.557911	0.419437	4	4	4	15.3	15.3	15.3	42.592	0	27.068	8
J3KTL2	J3KTL2;Q07955;J3KSR8;J3QQV5;J3KSW7	J3KTL2;Q07955;J3KSR8	Serine/arginine-rich splicing factor 1	SRSF1		0.622118	0.729672	-0.3876	-0.52485	-2.97224	-2.35523	-0.945385	-0.797951	-0.462919	NaN	-1.84587	-1.83151	6	6	6	26.1	26.1	26.1	28.329	0	38.955	11
P30050	P30050	P30050	60S ribosomal protein L12	RPL12		0.627715	0.734416	-0.235885	-0.516213	0.361641	0.0909958	1.15218	1.53194	0.9279	NaN	0.606047	1.52627	6	6	6	54.5	54.5	54.5	17.818	0	56.805	32
P46778	P46778;G3V1B3;M0R181	P46778;G3V1B3;M0R181	60S ribosomal protein L21	RPL21		0.62776	0.730798	-0.248036	-0.516145	0.789118	-0.971636	0.0274525	0.0732002	0.637978	NaN	-0.256521	0.301252	5	5	5	38.1	38.1	38.1	18.565	0	37.162	19
P10809	P10809;E7ESH4;E7EXB4;C9JL25;C9JL19;C9JCQ4;C9J0S9	P10809	60 kDa heat shock protein, mitochondrial	HSPD1		0.630055	0.731392	0.591004	0.507286	0.674431	0.0216827	2.27208	3.14386	0.282841	-1.31635	1.94754	2.83401	17	17	17	40.8	40.8	40.8	61.054	0	141.88	83
P18124	P18124;A8MUD9;C9JZ88;C9JIJ5	P18124;A8MUD9	60S ribosomal protein L7	RPL7		0.634704	0.732468	-0.366995	-0.50549	1.45855	-0.976118	0.971991	1.52446	0.604429	NaN	1.33761	1.39311	9	9	9	36.3	36.3	36.3	29.225	0	60.202	28
P62979	P62979	P62979	Ubiquitin-40S ribosomal protein S27a;Ubiquitin;40S ribosomal protein S27a	RPS27A		0.638527	0.734505	0.44706	0.494512	1.5993	3.0153	1.43528	1.77429	3.88341	1.34146	0.681961	0.129103	8	8	5	50	50	28.2	17.965	0	62.934	55
P32322	P32322;J3QKT4;E2QRB3;J3KQ22;J3QL24;J3KSA9;J3QR88;J3QLK9;J3QL23;J3QL32	P32322;J3QKT4;E2QRB3;J3KQ22	Pyrroline-5-carboxylate reductase 1, mitochondrial;Pyrroline-5-carboxylate reductase	PYCR1		0.641669	0.73687	0.0947037	0.502579	-0.212059	NaN	-0.422939	-0.183815	-0.340862	NaN	-0.679211	-0.0828514	5	5	3	20.4	20.4	12.9	33.36	0	31.842	15
H0YEN5	H0YEN5;E9PQD7;P15880;E9PMM9;H3BNG3;H0YE27;I3L404;E9PPT0;E9PM36	H0YEN5;E9PQD7;P15880;E9PMM9	40S ribosomal protein S2	RPS2		0.64635	0.740519	0.180505	0.482797	-0.586145	-1.08396	-0.480972	-0.0658264	-1.20444	-1.01727	-0.891731	0.174517	4	4	4	24.1	24.1	24.1	21.154	0	25.785	25
P37108	P37108;H0YLA2	P37108;H0YLA2	Signal recognition particle 14 kDa protein	SRP14		0.647773	0.739579	0.202757	0.480674	0.529131	1.21097	0.809534	0.605854	1.43622	0.380526	-0.400587	0.928299	5	5	5	30.1	30.1	30.1	14.57	0	88.913	54
A0A0D9SFB3	A0A0D9SFB3;A0A0D9SG12;A0A0D9SF53;O00571;O15523;A0A0J9YVQ7;A0A087WVZ1;A0A0J9YYH6;C9J081;B4DLA0;C9J8G5;A0A087WX09;D6RCM4;Q9NQI0;H0Y960	A0A0D9SFB3;A0A0D9SG12;A0A0D9SF53;O00571;O15523	ATP-dependent RNA helicase DDX3X;ATP-dependent RNA helicase DDX3Y	DDX3X;DDX3Y		0.671725	0.772552	0.142895	0.445291	2.44558	2.27517	2.29361	3.11151	2.81101	1.83126	2.08757	2.82445	23	23	21	38.6	38.6	35.5	70.839	0	173.33	171
U3KQK0	U3KQK0	U3KQK0	Histone H2B	HIST1H2BN		0.673474	0.771412	-0.363674	-0.442733	3.6408	5.23798	4.73584	2.89815	6.36165	3.7569	3.7437	4.10523	19	19	1	44.6	44.6	4.8	18.804	0	208.7	300
A0A0U1RR32	A0A0U1RR32;A0A0U1RRH7;Q96KK5;Q6FI13;P20671;P0C0S8;Q99878;Q9BTM1;Q16777;H0YFX9;P16104;Q96QV6;Q8IUE6	A0A0U1RR32;A0A0U1RRH7;Q96KK5;Q6FI13;P20671;P0C0S8;Q99878;Q9BTM1;Q16777;H0YFX9	Histone H2A type 1-H;Histone H2A type 2-A;Histone H2A type 1-D;Histone H2A type 1;Histone H2A type 1-J;Histone H2A.J;Histone H2A type 2-C;Histone H2A	HIST1H2AH;HIST2H2AA3;HIST1H2AD;HIST1H2AG;HIST1H2AJ;H2AFJ;HIST2H2AC		0.674371	0.769491	-0.478291	-0.441421	3.90026	5.96162	5.01912	2.55534	7.07581	3.96892	3.47516	4.82961	15	15	5	34.3	34.3	18.9	18.481	0	183.76	158
A0A0B4J1V9	A0A0B4J1V9;Q9NRZ9;A0A087WSW7;F6XU50;Q9NW36;B1ALG6	A0A0B4J1V9;Q9NRZ9;A0A087WSW7;F6XU50;Q9NW36	Lymphoid-specific helicase	HELLS		0.679134	0.772601	-0.119433	-0.434474	-1.05886	-1.50582	-1.25233	-1.27572	-1.23122	-1.67115	-1.278	-0.434624	4	4	4	5.2	5.2	5.2	102.71	0	25.678	9
O60506	O60506;F6UXX1;B7Z645	O60506;F6UXX1;B7Z645	Heterogeneous nuclear ribonucleoprotein Q	SYNCRIP		0.680371	0.770206	-0.167333	-0.436955	-2.23093	-2.31356	-1.98115	-1.03128	-1.53999	NaN	-2.10099	-1.52471	4	4	3	7.7	7.7	5.8	69.602	0	24.603	8
P07305	P07305	P07305	Histone H1.0;Histone H1.0, N-terminally processed	H1F0		0.687836	0.775907	-0.359185	-0.425982	-1.26469	-1.12464	-1.65773	-1.00957	0.962702	NaN	-2.39673	-1.28089	4	4	4	18	18	18	20.863	0	23.433	5
P49458	P49458;E9PE20	P49458;E9PE20	Signal recognition particle 9 kDa protein	SRP9		0.689998	0.77537	-0.108248	-0.418718	-0.185785	-0.201166	0.0385876	-0.00460243	0.00171089	-0.66534	0.232058	0.511599	2	2	2	25.6	25.6	25.6	10.112	0	20.67	28
P62263	P62263;H0YB22;E5RH77	P62263;H0YB22;E5RH77	40S ribosomal protein S14	RPS14		0.712735	0.803834	-0.174451	-0.386111	2.0299	1.8591	1.61653	1.1064	2.99923	1.58928	1.13774	1.58349	5	5	5	35.1	35.1	35.1	16.273	0	42.747	59
P61978	P61978;Q5T6W2;S4R457;S4R359	P61978;Q5T6W2	Heterogeneous nuclear ribonucleoprotein K	HNRNPK		0.71722	0.805725	-0.130883	-0.379735	1.03821	1.80027	1.93141	2.6505	2.09967	1.69559	2.03013	2.11855	12	12	12	30.7	30.7	30.7	50.976	0	103.85	79
P29966	P29966	P29966	Myristoylated alanine-rich C-kinase substrate	MARCKS		0.718514	0.802228	0.365245	0.377898	-0.978188	-2.0148	0.468702	0.819033	-0.78091	-2.64216	-0.547054	0.80389	7	7	7	34.9	34.9	34.9	31.554	0	59.462	33
Q9UG63	Q9UG63;C9JHK9;C9JZV3	Q9UG63	ATP-binding cassette sub-family F member 2	ABCF2		0.726596	0.8116	-0.234823	-0.366462	-0.448183	-0.869745	-1.0503	-0.511763	-0.70244	-1.79496	-0.657001	1.21371	7	7	7	14.1	14.1	14.1	71.289	0	44.471	17
P42766	P42766;F2Z388	P42766	60S ribosomal protein L35	RPL35		0.730596	0.810697	0.241714	0.360822	3.70312	4.53712	2.44039	3.02735	4.6521	2.61484	2.91696	2.55724	8	8	8	39	39	39	14.551	0	73.223	87
Q96CT7	Q96CT7;M0R2F5	Q96CT7;M0R2F5	Coiled-coil domain-containing protein 124	CCDC124		0.74953	0.831676	-0.147556	-0.334298	0.902811	-0.00518608	0.581354	0.440186	0.807802	-0.465092	0.7159	1.45078	6	6	6	33.6	33.6	33.6	25.835	0	46.286	31
B1AKR6	B1AKR6;Q9NP97;H3BQI1;Q8TF09	B1AKR6;Q9NP97	Dynein light chain roadblock-type 1	DYNLRB1		0.74971	0.828197	0.26851	0.33713	-0.525742	-1.55509	0.188465	1.21318	-1.19001	NaN	-0.563921	0.43902	3	3	3	33.1	33.1	33.1	16.253	0	23.238	20
Q93077	Q93077;Q7L7L0;P04908	Q93077;Q7L7L0;P04908	Histone H2A type 1-C;Histone H2A type 3;Histone H2A type 1-B/E	HIST1H2AC;HIST3H2A;HIST1H2AB		0.759396	0.837607	-0.518451	-0.323518	-2.61599	0.237251	-1.24381	-3.29366	1.91323	NaN	-2.91156	-2.63347	11	1	1	44.6	8.5	8.5	14.105	0	13.371	8
Q9NR30	Q9NR30;A0A087WVC1;Q9BQ39	Q9NR30	Nucleolar RNA helicase 2	DDX21		0.762626	0.837422	-0.202528	-0.316111	-1.08737	0.671457	-0.570221	-0.796188	1.21509	-0.358995	-1.12298	-0.705322	6	6	6	9.6	9.6	9.6	87.343	0	40.836	13
Q07021	Q07021;I3L3Q7;I3L3B0	Q07021;I3L3Q7;I3L3B0	Complement component 1 Q subcomponent-binding protein, mitochondrial	C1QBP		0.763356	0.834265	0.268867	0.315101	-0.810778	-1.23121	-0.780254	1.66936	-0.739523	-1.63968	-0.789135	0.939991	3	3	3	16.3	16.3	16.3	31.362	0	31.189	24
P78527	P78527	P78527	DNA-dependent protein kinase catalytic subunit	PRKDC		0.770019	0.842537	0.0939134	0.312861	-0.933983	NaN	-1.14628	-0.435184	-1.07069	NaN	-1.21356	-0.512936	6	6	6	2	2	2	469.08	0	42.62	13
Q9Y383	Q9Y383;A0A0A6YYJ8;B8ZZ10;A8MYV2;Q9NQ29;V9GZ75;F8WEU3;B8ZZ09	Q9Y383;A0A0A6YYJ8;B8ZZ10;A8MYV2;Q9NQ29	Putative RNA-binding protein Luc7-like 2;Putative RNA-binding protein Luc7-like 1	LUC7L2;LUC7L		0.770641	0.839158	0.179727	0.30504	-0.362791	-1.28449	-0.387409	-0.453508	0.296839	-1.88691	-1.58043	-0.036602	4	4	4	12.2	12.2	12.2	46.513	0	45.932	25
P63261	P63261;P60709;I3L3I0;I3L1U9;P63267;P68133;P68032;P62736;G5E9R0;K7EM38;E7EVS6;I3L3R2;J3KT65;I3L4N8;A6NL76;C9JTX5;C9JUM1;C9JZR7;F8WB63;B8ZZJ2;C9JFL5;F6UVQ4;F6QUT6;Q6S8J3;A5A3E0;F8WCH0;Q9BYX7;Q562R1;P0CG38;P0CG39	P63261;P60709;I3L3I0;I3L1U9;P63267;P68133;P68032;P62736;G5E9R0;K7EM38;E7EVS6;I3L3R2;J3KT65;I3L4N8;A6NL76;C9JTX5;C9JUM1;C9JZR7;F8WB63;B8ZZJ2;C9JFL5;F6UVQ4;F6QUT6	Actin, cytoplasmic 2;Actin, cytoplasmic 2, N-terminally processed;Actin, cytoplasmic 1;Actin, cytoplasmic 1, N-terminally processed;Actin, gamma-enteric smooth muscle;Actin, alpha skeletal muscle;Actin, alpha cardiac muscle 1;Actin, aortic smooth muscle	ACTG1;ACTB;ACTG2;ACTA1;ACTC1;ACTA2		0.775818	0.843633	-0.156629	-0.29791	0.228632	-0.0560684	0.763226	1.43143	1.30376	-0.323025	0.536673	1.47633	8	8	8	26.1	26.1	26.1	41.792	0	55.679	35
P24534	P24534;F8WF65;F2Z2G2;C9JZW3	P24534;F8WF65;F2Z2G2;C9JZW3	Elongation factor 1-beta	EEF1B2		0.777164	0.842157	0.183355	0.302761	-0.487619	NaN	-0.588406	0.610811	-0.587681	NaN	-0.995602	0.568005	4	4	4	23.1	23.1	23.1	24.763	0	43.971	19
P05141	P05141;P12236;V9GYG0;P12235;Q9H0C2	P05141;P12236;V9GYG0;P12235;Q9H0C2	ADP/ATP translocase 2;ADP/ATP translocase 2, N-terminally processed;ADP/ATP translocase 3;ADP/ATP translocase 3, N-terminally processed;ADP/ATP translocase 1;ADP/ATP translocase 4;ADP/ATP translocase 4, N-terminally processed	SLC25A5;SLC25A6;SLC25A4;SLC25A31		0.778551	0.839983	-0.111118	-0.296804	-1.23366	-1.63791	-1.58637	-0.490406	-1.24664	NaN	-1.47754	-0.653725	4	4	4	14.1	14.1	14.1	32.852	0	22.903	6
Q07666	Q07666	Q07666	KH domain-containing, RNA-binding, signal transduction-associated protein 1	KHDRBS1		0.77914	0.837621	0.116234	0.293346	0.243048	-0.0501976	0.41502	0.51679	1.22229	-0.557581	-0.0428009	0.0378113	7	7	7	16	16	16	48.227	0	47.45	33
P19338	P19338;H7BY16;C9JYW2;C9JLB1;C9J1H7;C9JWL1	P19338;H7BY16	Nucleolin	NCL		0.814166	0.882506	0.0923672	0.245615	2.714	2.48365	2.77133	3.51781	2.44398	2.18364	2.93389	3.55581	20	20	20	30.3	30.3	30.3	76.613	0	181.11	131
P61254	P61254;J3QRI7;J3QQQ9;J3QQV1;J3KTJ8;J3QRC4;J3KSS0	P61254;J3QRI7;J3QQQ9;J3QQV1;J3KTJ8;J3QRC4;J3KSS0	60S ribosomal protein L26	RPL26		0.819662	0.886701	-0.0946684	-0.238187	1.85209	1.3716	1.513	1.96063	2.60874	0.860151	2.05934	1.54778	11	11	4	49.7	49.7	13.1	17.258	0	72.384	85
A0A0G2JJZ9	A0A0G2JJZ9;Q13838;A0A140T9X3;Q5STU3;A0A140T9X9;H0Y400;A0A140T996;F6UJC5;A0A140TA18;F6WLT2;O00148;A0A140T9L4;A0A140T973;A0A140T9K1;F6S4E6;A0A0A0MT12;F6TRA5;H0YCC6	A0A0G2JJZ9;Q13838;A0A140T9X3;Q5STU3;A0A140T9X9;H0Y400;A0A140T996;F6UJC5;A0A140TA18;F6WLT2;O00148	Spliceosome RNA helicase DDX39B;ATP-dependent RNA helicase DDX39A	DDX39B;DDX39A		0.830853	0.896477	-0.207391	-0.227964	-1.91074	NaN	-1.65622	0.665319	-1.1996	NaN	-1.10812	0.0282459	5	5	5	17.4	17.4	17.4	38.125	0	33.535	10
P46940	P46940;A0A0J9YXZ5;H0YLE8	P46940;A0A0J9YXZ5;H0YLE8	Ras GTPase-activating-like protein IQGAP1	IQGAP1		0.833204	0.895678	0.162155	0.224729	-0.90486	NaN	-2.26534	-0.82744	-1.66587	-2.35033	NaN	-0.467903	4	4	4	3	3	3	189.25	0	24.822	7
P62899	P62899;H7C2W9;C9JU56;B7Z4E3;B7Z4C8;B8ZZK4	P62899;H7C2W9;C9JU56;B7Z4E3;B7Z4C8	60S ribosomal protein L31	RPL31		0.833394	0.892203	-0.0621309	-0.219692	1.11649	1.23514	1.05285	1.38499	1.43215	1.07128	0.622936	1.91162	6	6	6	42.4	42.4	42.4	14.463	0	43.131	46
P62906	P62906	P62906	60S ribosomal protein L10a	RPL10A		0.842149	0.899613	-0.0836871	-0.20974	0.772449	-0.0636425	0.231991	0.730524	0.331774	NaN	-0.0583973	1.23118	5	5	5	27.2	27.2	27.2	24.831	0	37.493	34
A0A024R4M0	A0A024R4M0;P46781;B5MCT8;C9JM19;F2Z3C0;A8MXK4	A0A024R4M0;P46781;B5MCT8;C9JM19	40S ribosomal protein S9	RPS9		0.844362	0.897958	-0.102582	-0.204984	-0.552124	0.440325	-0.484982	1.16015	-0.518438	0.635429	0.746344	0.110367	9	9	9	40.2	40.2	40.2	22.591	0	58.751	40
P84090	P84090;G3V279	P84090	Enhancer of rudimentary homolog	ERH		0.849507	0.901333	0.125666	0.198102	1.60797	1.48724	2.9729	3.86769	2.79596	1.55288	2.59836	2.48594	8	8	8	59.6	59.6	59.6	12.259	0	83.469	91
P32969	P32969;E7ESE0;D6RAN4;H0Y9V9;H0Y9R4	P32969;E7ESE0;D6RAN4;H0Y9V9	60S ribosomal protein L9	RPL9		0.857559	0.909643	-0.128202	-0.187354	-0.788525	0.998262	-1.43097	-0.139618	-0.604904	0.261051	-1.25583	0.751642	7	7	7	47.9	47.9	47.9	21.863	0	55.142	20
P13010	P13010	P13010	X-ray repair cross-complementing protein 5	XRCC5		0.875001	0.925983	0.0756927	0.165544	0.10569	-0.329086	-0.421818	1.15743	-0.155134	NaN	-0.123131	0.435347	7	7	7	11.3	11.3	11.3	82.704	0	52.978	18
Q8WVS4	Q8WVS4;H7C022;H7C1E8	Q8WVS4;H7C022	WD repeat-containing protein 60	WDR60		0.895027	0.952066	0.0442278	0.138798	-0.134882	-1.06104	-0.0899658	0.102362	-0.272776	NaN	-0.533659	-0.213894	7	7	7	8.7	8.7	8.7	122.57	0	48.025	12
P39023	P39023;G5E9G0;B5MCW2;H7C422;H7C3M2;F8WCR1;Q92901	P39023;G5E9G0;B5MCW2;H7C422	60S ribosomal protein L3	RPL3		0.896637	0.950656	0.0661149	0.135515	1.01427	0.134289	1.04592	1.71658	0.81897	0.145632	0.780197	1.9018	7	7	7	22.1	22.1	22.1	46.108	0	46.934	35
E9PEB5	E9PEB5;Q96AE4;C9JSZ1	E9PEB5;Q96AE4	Far upstream element-binding protein 1	FUBP1		0.897579	0.947478	0.050265	0.137096	-1.00006	NaN	-0.0911961	-0.0944576	-0.832315	NaN	-0.381329	-0.122866	6	5	5	11.3	10.1	10.1	68.903	0	30.208	7
M0QXS5	M0QXS5;P14866;M0QYT0;M0R076	M0QXS5;P14866;M0QYT0	Heterogeneous nuclear ribonucleoprotein L	HNRNPL		0.902644	0.948699	0.0569239	0.127588	-1.55508	0.0864906	-0.918255	0.0699425	-0.0793896	-0.737226	-0.992033	-0.735947	6	6	6	13.4	13.4	13.4	58.362	0	42.702	22
P46777	P46777;Q5T7N0	P46777	60S ribosomal protein L5	RPL5		0.908742	0.951935	-0.0906003	-0.120549	-0.674402	-0.87001	0.481457	0.974897	-0.746935	NaN	-0.375683	1.32837	5	5	5	17.5	17.5	17.5	34.362	0	31.607	15
F6VRR5	F6VRR5;Q9BY77;F8WCX5;Q8WUT1;Q6R954;F8WEE2	F6VRR5;Q9BY77;F8WCX5;Q8WUT1	Polymerase delta-interacting protein 3	POLDIP3		0.912132	0.951113	-0.033823	-0.115086	-0.319445	-0.396954	-0.303204	-0.766504	-0.263092	-0.953779	0.284618	-0.718561	7	7	7	24.9	24.9	24.9	48.103	0	45.682	12
K7ENG2	K7ENG2;P26368	K7ENG2;P26368	Splicing factor U2AF 65 kDa subunit	U2AF2		0.912235	0.947293	-0.0730689	-0.11591	-1.86308	-1.63167	-1.42915	-0.160215	-1.67754	NaN	-1.77111	-0.145229	2	2	2	8.5	8.5	8.5	33.901	0	12.937	11
A0A024QZP7	A0A024QZP7;P06493;F8VXD2;K7ELV5;F8VYH9;F8VZZ0;E5RIU6;F8VTV8;F8VWX7;F8VZ51;K7EJ83;A0A087WZZ9;E7ESI2;H0YAZ9;E7EUK8;G3V5T9;E5RGN0;A0A087WZU2;F5H6Z0;J3QSD7;Q00535;P24941;P11802;Q00526;Q00534;P50750;Q96Q40;O94921;Q07002;Q00536;Q00537;Q9NYV4	A0A024QZP7;P06493	Cyclin-dependent kinase 1	CDC2;CDK1		0.913984	0.944496	-0.0306528	-0.113589	-0.691025	-1.25826	-0.608734	-0.295385	-0.963615	NaN	-0.648922	-0.435556	4	4	3	15.8	15.8	13.1	34.081	0	24.39	9
K7EMV3	K7EMV3;B4DEB1;K7EK07;K7ES00;Q71DI3;Q16695;P84243;P68431;K7EP01;Q5TEC6;Q6NXT2	K7EMV3;B4DEB1;K7EK07;K7ES00;Q71DI3;Q16695;P84243;P68431;K7EP01;Q5TEC6;Q6NXT2	Histone H3;Histone H3.2;Histone H3.1t;Histone H3.3;Histone H3.1;Histone H3.3C	H3F3B;H3F3A;HIST2H3A;HIST3H3;HIST1H3A;HIST2H3PS2;H3F3C		0.91462	0.942327	0.16267	0.111811	0.740635	2.34748	2.81976	1.81702	3.75661	-2.10125	1.63518	3.78368	4	4	4	26.1	26.1	26.1	10.334	0	24.895	40
Q12906	Q12906;K7EKJ9;K7ERM6;K7ENK6;K7EM82;K7EJ09;K7ER69;K7EQ75;K7EQR9;Q96SI9	Q12906	Interleukin enhancer-binding factor 3	ILF3		0.927407	0.955063	-0.0485649	-0.095002	0.294073	0.716078	0.71744	1.14979	1.20558	-0.645313	1.48496	1.02641	10	10	10	14.9	14.9	14.9	95.337	0	61.668	29
P68104	P68104;Q5VTE0;A0A087WVQ9;Q05639;A0A087WV01;A6PW80;Q5JR01	P68104;Q5VTE0;A0A087WVQ9;Q05639;A0A087WV01	Elongation factor 1-alpha 1;Putative elongation factor 1-alpha-like 3;Elongation factor 1-alpha 2;Elongation factor 1-alpha	EEF1A1;EEF1A1P5;EEF1A2		0.933728	0.960443	0.0417171	0.0867036	3.87445	3.53581	4.07408	4.80915	3.59512	3.36736	4.00315	5.161	11	11	11	28.6	28.6	28.6	50.14	0	86.089	158
P49411	P49411;H3BNU3	P49411	Elongation factor Tu, mitochondrial	TUFM		0.937908	0.962661	-0.0480871	-0.0812204	-0.559383	-1.25895	-0.599289	0.735163	-0.908709	-1.10087	-0.23982	0.759283	7	7	7	21	21	21	49.541	0	47.711	17
A0A0J9YX35	A0A0J9YX35;S4R460;A0A0B4J2B5;S4R3C0;A0A075B7F1;A0A0C4DH35;A0A0C4DH30;A0A0B4J1X5;A0A075B7E8;A0A0B4J1Y9;A0A075B7D8;P01766;P01780;P01764;P01763	A0A0J9YX35;S4R460;A0A0B4J2B5;S4R3C0;A0A075B7F1;A0A0C4DH35;A0A0C4DH30;A0A0B4J1X5;A0A075B7E8;A0A0B4J1Y9;A0A075B7D8;P01766;P01780;P01764;P01763	Ig heavy chain V-III region BRO;Ig heavy chain V-III region JON;Ig heavy chain V-III region 23;Ig heavy chain V-III region WEA	IGHV3OR16-9;IGHV3OR16-8;IGHV3-35;IGHV3-16;IGHV3-74;IGHV3OR16-13;IGHV3-72;IGHV3OR15-7;IGHV3-23		0.942603	0.963906	-0.0560932	-0.0766224	-1.66437	NaN	-1.51974	-1.26167	NaN	-2.67747	-1.4255	-0.174532	2	2	2	23.1	23.1	23.1	12.822	0	14.111	7
J3QR09	J3QR09;J3KTE4;P84098;J3QL15	J3QR09;J3KTE4;P84098	Ribosomal protein L19;60S ribosomal protein L19	RPL19		0.945432	0.964328	0.0425126	0.0719485	2.37508	0.149035	1.03624	0.701765	1.40673	NaN	1.03567	0.62665	7	7	7	31.1	31.1	31.1	23.134	0	52.583	35
C9J4V0	C9J4V0;C9J8S3;P51149;C9J4S4;C9IZZ0	C9J4V0;C9J8S3;P51149;C9J4S4;C9IZZ0	Ras-related protein Rab-7a	RAB7A		0.948165	0.964716	-0.0580664	-0.0683378	-2.18964	NaN	-1.4694	-0.640657	-1.22433	-3.18272	-0.144043	-0.94957	2	2	2	18.7	18.7	18.7	15.138	0	13.048	9
P26641	P26641	P26641	Elongation factor 1-gamma	EEF1G		0.948292	0.961178	-0.0108153	-0.0690129	-0.385031	NaN	-0.365816	-0.669975	-0.628242	NaN	-0.224712	-0.535421	3	3	3	9.6	9.6	9.6	50.118	0	17.63	10
E9PBF6	E9PBF6;P20700;A0A0D9SFY5;A0A0D9SFE5	E9PBF6;P20700;A0A0D9SFY5;A0A0D9SFE5	Lamin-B1	LMNB1		0.96238	0.975243	0.020601	0.0495754	-2.19895	-1.81855	-1.44463	-1.98331	-1.00533	-2.21288	NaN	-2.42767	2	2	2	5.7	5.7	5.7	44.643	0	12.403	4
P20042	P20042	P20042	Eukaryotic translation initiation factor 2 subunit 2	EIF2S2		0.968391	0.9776	-0.00942659	-0.0416489	-0.878448	-1.71915	-1.15406	-1.12276	-1.03176	NaN	-1.37623	-1.21954	4	4	4	16.5	16.5	16.5	38.388	0	22.337	5
O75190	O75190;A0A0J9YX62;E9PH18;C9J2C4;C9JB42;C9JDR7;C9JDX6;F8WCZ4;C9J2P2;C9JN01;C9JRD2;C9JXB9;Q8WWF6;Q8NHS0;P25686	O75190;A0A0J9YX62;E9PH18;C9J2C4	DnaJ homolog subfamily B member 6	DNAJB6		0.985894	0.997134	-0.00763941	-0.0184287	0.130072	-1.43253	-0.55057	-0.56004	-0.20903	-1.28975	-0.718855	-0.164871	5	5	5	20.9	20.9	20.9	36.087	0	32.419	20
Q8J015	Q8J015;M0QYS1;P40429;Q6NVV1	Q8J015;M0QYS1;P40429	60S ribosomal protein L13a	RPL13a;RPL13A		0.988201	0.996977	0.00306257	0.0157332	-0.947206	NaN	-0.775473	-1.33662	-1.0915	NaN	-0.822758	-1.15422	3	3	3	20.4	20.4	20.4	16.731	0	19.9	11
Q9UMS4	Q9UMS4;F5GY56;H0YGF3;F5H2I0	Q9UMS4;F5GY56	Pre-mRNA-processing factor 19	PRPF19		0.99247	0.999179	0.00415945	0.00983765	-0.546627	-0.25367	-0.540134	-0.122482	-0.444466	-0.950199	-0.894964	0.810078	5	5	5	15.9	15.9	15.9	55.18	0	32.367	13
H3BRU6	H3BRU6;F8VZX2;Q15366;F8W0G4;F8VXH9;F8W1G6;J3QT27;E9PFP8;P57721;H3BND9;F8VTZ0;H3BSS4;F8VRH0	H3BRU6;F8VZX2;Q15366;F8W0G4;F8VXH9;F8W1G6;J3QT27;E9PFP8;P57721	Poly(rC)-binding protein 2;Poly(rC)-binding protein 3	PCBP2;PCBP3		0.993614	0.99803	-0.00620794	-0.00834281	-1.25055	-0.624588	0.0900974	0.818171	-0.301012	-1.89427	0.672661	0.58058	6	6	4	30.6	30.6	20.3	31.6	0	37.017	19
P26373	P26373;J3QSB4;H3BTH3;J3KS98	P26373;J3QSB4	60S ribosomal protein L13	RPL13		0.994218	0.994717	0.00237751	0.00755345	1.44512	1.3688	1.81419	1.66768	1.96871	0.904549	1.24574	2.1673	11	11	11	37	37	37	24.261	0	79.587	72

## Sheet: interact_quantititative
Protein IDs	Majority protein IDs	Protein names	Gene names	Student's T-test p-value DIA_WT	Student's T-test q-value DIA_WT	Student's T-test Difference DIA_WT	Student's T-test Test statistic DIA_WT	LFQ intensity 1_5_DIA	LFQ intensity 1_7_DIA	LFQ intensity 2_5_DIA	LFQ intensity 2_7_DIA	LFQ intensity 1_5_WT	LFQ intensity 1_7_WT	LFQ intensity 2_5_WT	LFQ intensity 2_7_WT	Peptides	Razor + unique peptides	Unique peptides	Sequence coverage [%]	Unique + razor sequence coverage [%]	Unique sequence coverage [%]	Mol. weight [kDa]	Q-value	Score	MS/MS count
Q8NDZ4;E7ET39;C9JY09	Q8NDZ4	Deleted in autism protein 1	C3orf58	0.00108354	0.00355556	7.90112	5.86807	6.24879	5.10997	6.25128	6.76462	-2.75434	-4.40275	1.75012	-1.82285	37	37	37	53.7	53.7	53.7	49.481	0	307.61	282
Q9UQ35;I3L1I8;I3L182;I3L4D8;I3L1C0;A0A087X1W1	Q9UQ35	Serine/arginine repetitive matrix protein 2	SRRM2	0.000847827	0	2.6424	6.14885	3.18244	2.02181	2.61874	2.72795	0.384098	-1.02928	0.0598984	0.566637	15	15	15	8.1	8.1	8.1	299.61	0	129.76	62
P04843;B7Z4L4;F8WF32	P04843;B7Z4L4	Dolichyl-diphosphooligosaccharide--protein glycosyltransferase subunit 1	RPN1	0.000755324	0	2.57073	6.28457	2.1546	1.19967	1.23126	1.87237	-0.95417	-1.81516	-0.863935	-0.191736	13	13	13	26.2	26.2	26.2	68.569	0	128.27	48
P17987;E7EQR6;F5H282;E7ERF2;F5GZI8;F5H726;F5H676;F5H136;F5GYL4	P17987;E7EQR6;F5H282	T-complex protein 1 subunit alpha	TCP1	0.000883352	0	2.4686	6.10118	1.10505	1.00709	0.50256	1.43124	-1.22752	-2.50424	-1.18465	-0.912035	11	11	10	23.9	23.9	21.4	60.343	0	81.267	32
F5GYV5;H7BZV4;A0A0C4DG62;F8WCT1;F5H7X4;Q66PJ3	F5GYV5;H7BZV4;A0A0C4DG62;F8WCT1;F5H7X4;Q66PJ3	ADP-ribosylation factor-like protein 6-interacting protein 4	ARL6IP4	0.00152194	0.00715789	2.45753	5.495	0.907465	-0.250187	0.0301075	0.336668	-1.56215	-3.20372	-2.32258	-1.71762	3	3	3	17.5	17.5	17.5	23.687	0	64.948	15
Q6Y7W6;I1E4Y6;E7ESB6;C9JHW1;C9JH18;C9J0V6;C9JHT0;C9JRZ2;F8WCD5;C9JPV7;C9JXQ0;C9JH78;C9IYH5;C9JW88;C9J7G1;B8ZZD2;REV__A8MUV4	Q6Y7W6;I1E4Y6;E7ESB6	PERQ amino acid-rich with GYF domain-containing protein 2	GIGYF2	0.00437401	0.02656	2.09119	4.44039	4.47013	3.53816	4.80581	5.14154	2.37603	1.50478	2.76898	2.94107	39	39	39	32.3	32.3	32.3	150.07	0	323.31	257
P55084;F5GZQ3;B5MD38;C9K0M0;C9JEY0;C9JE81	P55084;F5GZQ3;B5MD38	Trifunctional enzyme subunit beta, mitochondrial;3-ketoacyl-CoA thiolase	HADHB	0.00482144	0.029037	1.98206	4.35022	0.759514	0.152958	1.30438	1.97857	-0.833765	-1.49354	-1.05279	-0.352737	7	7	7	17.7	17.7	17.7	51.294	0	54.621	19
Q96AG4;I3L223	Q96AG4	Leucine-rich repeat-containing protein 59	LRRC59	0.00612275	0.0333793	1.82939	4.13353	3.18147	2.53061	2.18128	2.95793	0.49999	0.196442	0.888054	1.94926	9	9	9	33.6	33.6	33.6	34.93	0	84.442	60
P40227;Q92526	P40227	T-complex protein 1 subunit zeta	CCT6A	0.0020905	0.012381	1.74205	5.16207	1.09741	0.87904	0.777937	1.40954	-1.08053	-1.33427	-0.387749	-0.00171471	9	9	9	23.4	23.4	23.4	58.024	0	60.128	26
E5RJU9;Q86UE4;H0YB56	E5RJU9;Q86UE4;H0YB56	Protein LYRIC	MTDH	0.000785615	0	1.66607	7.23816	0.44109	-0.441994	-0.067709	-0.148754	-1.69146	NaN	-1.57987	-1.88989	6	6	6	13.7	13.7	13.7	57.521	0	36.734	15
P78371;F5GWF6;F8VQ14	P78371;F5GWF6;F8VQ14	T-complex protein 1 subunit beta	CCT2	0.00347703	0.0225455	1.58946	5.19654	1.86109	0.888969	1.30139	1.55801	-0.553522	NaN	-0.218445	0.210686	11	11	11	31.2	31.2	31.2	57.488	0	86.594	55
Q07065	Q07065	Cytoskeleton-associated protein 4	CKAP4	0.00804966	0.0445161	1.5866	4.25546	-0.169403	-0.237642	-1.3187	-1.26709	-2.35886	NaN	-2.31179	-2.33378	7	7	7	15.3	15.3	15.3	66.022	0	46.793	13
Q15084	Q15084	Protein disulfide-isomerase A6	PDIA6	0.000574607	0	1.55379	7.74203	-0.574757	-0.809454	-1.25679	-0.633518	-2.39995	NaN	-2.52938	-2.18793	4	4	4	13.4	13.4	13.4	48.121	0	28.458	17
P49368;B4DUR8;Q5SZX6;E9PRC8;Q5SZX9;E9PQ35;E9PM09;Q5SZW8	P49368;B4DUR8	T-complex protein 1 subunit gamma	CCT3	0.00508401	0.028	1.3475	4.75454	0.868099	0.883751	0.537424	1.26243	-0.864985	NaN	-0.55555	0.0418205	11	11	11	24.4	24.4	24.4	60.533	0	76.311	32
P67809;H0Y449;C9J5V9;Q9Y2T7	P67809;H0Y449	Nuclease-sensitive element-binding protein 1	YBX1	0.00986933	0.043125	1.33338	3.71854	2.14276	1.69464	2.49318	2.25926	1.02495	-0.0754948	0.889149	1.41772	11	11	7	41	41	29.6	35.924	0	151.03	65
G3V210;F8VU65;F8VWS0;Q8NHW5;P05388;F8VQY6;F8VPE8;F8VRK7;F8VW21;F8VWV4;F8VS58;F8VZS0	G3V210;F8VU65;F8VWS0;Q8NHW5;P05388;F8VQY6;F8VPE8;F8VRK7;F8VW21;F8VWV4;F8VS58;F8VZS0	60S acidic ribosomal protein P0-like;60S acidic ribosomal protein P0	RPLP0;RPLP0P6	0.000848366	0	1.30427	6.14811	-0.251833	-0.530102	0.132925	0.228092	-1.51892	-1.56198	-1.05416	-1.50295	5	5	5	33.1	33.1	33.1	18.27	0	32.455	21
P62269;J3JS69;A0A0G2JQH2;Q5GGW2	P62269;J3JS69	40S ribosomal protein S18	RPS18	0.00349662	0.0215652	-0.842171	-4.65194	1.99883	2.19596	2.35739	1.83177	2.60367	2.81653	3.11615	3.21629	10	10	10	44.1	44.1	44.1	17.718	0	95.819	107
Q9P258	Q9P258	Protein RCC2	RCC2	0.00712557	0.0408	-1.05461	-4.38434	0.568426	-0.334286	0.118099	0.218904	1.37257	NaN	1.2416	0.978016	7	7	7	14.4	14.4	14.4	56.084	0	43.826	29
A0A0B4J220;E9PLD3;E9PRG8	A0A0B4J220;E9PLD3;E9PRG8	Uncharacterized protein C11orf98	C11orf98	0.000412123	0	-1.11855	-7.03516	-1.14513	-1.57516	-1.58805	-1.04865	-0.247295	-0.168468	-0.0604572	-0.406574	3	3	3	22.8	22.8	22.8	14.234	0	19.192	15
P62753;A2A3R5;A2A3R7	P62753;A2A3R5	40S ribosomal protein S6	RPS6	0.0043735	0.0276667	-1.12171	-4.4405	1.94163	2.25454	2.1612	2.96866	3.7603	3.51532	3.21148	3.32576	11	11	11	33.7	33.7	33.7	28.68	0	84.124	110
P08708;H0YN88;A0A075B716;H0YN73;H3BNC9	P08708;H0YN88;A0A075B716	40S ribosomal protein S17	RPS17	0.00179375	0.0098	-1.50982	-5.32084	1.63836	0.637657	0.699276	1.51996	2.78256	2.454	2.4579	2.84007	7	7	7	60	60	60	15.55	0	90.998	110
J3KNN5;Q9UJV9;H0Y8L8;D6RGI7;H0YA06	J3KNN5;Q9UJV9	Probable ATP-dependent RNA helicase DDX41	DDX41	0.00450992	0.0255385	-1.65166	-4.41194	1.49457	0.392021	0.868437	0.92675	2.73752	1.95815	2.26475	3.32801	13	13	13	23.1	23.1	23.1	71.648	0	96.465	69
Q9Y3C1;D6RIC3;A0A0C4DGU5;A0A087X2G6;D6RC60	Q9Y3C1;D6RIC3;A0A0C4DGU5;A0A087X2G6	Nucleolar protein 16	NOP16	0.000928633	0	-1.68316	-6.04349	-0.747637	-1.17307	-1.05928	-0.784084	1.28109	0.105757	0.566423	1.01529	8	8	8	37.1	37.1	37.1	21.188	0	52.184	20
C9JEJ2;P49585;C9J050;C9J2E1;H7C1T3;C9JPY0;H7BZN1;C9JVS0;F8WAZ5;Q9Y5K3;F8WBU2	C9JEJ2;P49585;C9J050;C9J2E1;H7C1T3	Choline-phosphate cytidylyltransferase A	PCYT1A	0.000877553	0	-2.16922	-6.10881	1.4509	0.227125	0.617765	0.642122	3.01341	2.34659	2.7415	3.51328	14	14	14	40.8	40.8	40.8	43.263	0	108.95	76
A0A0D9SEW3;A0A087WXF8;Q9NP64;A0A087WYV3;A0A087WXU5;A0A087WYF0	A0A0D9SEW3;A0A087WXF8;Q9NP64;A0A087WYV3;A0A087WXU5	Nucleolar protein of 40 kDa	ZCCHC17	0.000887942	0	-2.23399	-6.09518	1.6218	0.915033	0.572807	0.673595	3.60081	2.5889	2.8175	3.71198	10	10	10	35.8	35.8	35.8	27.994	0	72.87	99
J3KQ96;E7ETY2;Q13428;H0YA99;H0YAB7	J3KQ96;E7ETY2;Q13428	Treacle protein	TCOF1	0.000167982	0	-2.24361	-8.28039	0.504707	-0.000627518	0.617376	-0.00630951	2.74675	1.87674	2.73441	2.73171	17	17	17	15.1	15.1	15.1	144.12	0	132.23	61
Q9BVP2;C9JZT7;B4DMU5;C9JYH9	Q9BVP2	Guanine nucleotide-binding protein-like 3	GNL3	0.000851236	0	-2.30734	-6.14418	2.46235	1.80166	1.4562	2.03381	4.59115	3.52996	3.95307	4.90917	19	19	19	37.7	37.7	37.7	61.992	0	184.37	212
O15127;H3BV04;H3BN93;H3BUB6;H3BPL9	O15127	Secretory carrier-associated membrane protein 2	SCAMP2	0.000208271	0	-3.23051	-7.9664	-2.51431	-2.121	-2.2089	-2.3212	1.70232	0.0351429	1.49812	0.521051	3	3	3	13.7	13.7	13.7	36.648	0	62.899	21
O14828	O14828	Secretory carrier-associated membrane protein 3	SCAMP3	0.000139954	0	-3.42992	-8.55529	-2.01768	-2.67059	-2.65315	-2.44209	1.51068	-0.0188713	0.864855	1.57948	6	6	6	19.9	19.9	19.9	38.287	0	63.468	29
P56945;H3BN62;H3BVF0;H3BSY4;H3BQJ7;H3BSB2	P56945	Breast cancer anti-estrogen resistance protein 1	BCAR1	0.000143083	0	-3.47832	-8.52158	-0.995876	-1.88873	-1.59483	-1.41222	2.3765	1.10386	1.77611	2.76515	10	10	10	18.4	18.4	18.4	93.371	0	99.077	42
A0A1B0GTL5;Q9BXF6	A0A1B0GTL5;Q9BXF6	Rab11 family-interacting protein 5	RAB11FIP5	0.000480901	0	-3.58472	-10.4102	-2.06779	NaN	-2.39512	-2.7253	1.58962	NaN	1.34461	0.631712	6	6	6	8.2	8.2	8.2	138.41	0	54.572	16
E7EX40;Q6WKZ4	E7EX40;Q6WKZ4	Rab11 family-interacting protein 1	RAB11FIP1	6.52751e-05	0	-4.25465	-9.79232	-1.47461	-2.50331	-2.19415	-1.7561	2.29325	1.23387	2.63594	2.92736	9	9	8	24.4	24.4	22	54.832	0	97.159	42

## Sheet: interact_qualititative
Protein IDs	Majority protein IDs	Protein names	Gene names	DIA	WT	LFQ intensity 1_5_DIA	LFQ intensity 1_7_DIA	LFQ intensity 2_5_DIA	LFQ intensity 2_7_DIA	LFQ intensity 1_5_WT	LFQ intensity 1_7_WT	LFQ intensity 2_5_WT	LFQ intensity 2_7_WT	Peptides	Razor + unique peptides	Unique peptides	Sequence coverage [%]	Unique + razor sequence coverage [%]	Unique sequence coverage [%]	Mol. weight [kDa]	Q-value	Score	MS/MS count
E7EU85;E9PFF5;B4DXZ6;P51114;P51116	E7EU85;E9PFF5;B4DXZ6;P51114	Fragile X mental retardation syndrome-related protein 1	FXR1	+	NaN	-1.2341	NaN	-1.30884	-0.89823	NaN	NaN	NaN	NaN	3	3	2	11.2	11.2	9.5	50.99	0	17.544	4
O00165;E9PIQ7	O00165	HCLS1-associated protein X-1	HAX1	+	NaN	-1.08529	NaN	-0.978481	-1.1686	NaN	NaN	NaN	NaN	3	3	3	12.9	12.9	12.9	31.62	0	17.549	4
O95831;E9PMA0	O95831	Apoptosis-inducing factor 1, mitochondrial	AIFM1	+	NaN	-1.0243	NaN	-1.14879	-1.26337	NaN	NaN	NaN	NaN	5	5	5	12.2	12.2	12.2	66.9	0	30.507	8
P41091;F8W810;Q2VIR3	P41091;F8W810;Q2VIR3	Eukaryotic translation initiation factor 2 subunit 3;Putative eukaryotic translation initiation factor 2 subunit 3-like protein	EIF2S3;EIF2S3L	NaN	+	NaN	NaN	NaN	NaN	-3.07162	NaN	-2.89399	-0.394295	2	2	2	8.3	8.3	8.3	51.109	0	13.257	3
P49755;G3V2K7	P49755;G3V2K7	Transmembrane emp24 domain-containing protein 10	TMED10	+	NaN	-0.903889	-2.0946	-1.95435	-1.52302	NaN	NaN	NaN	NaN	2	2	2	11.9	11.9	11.9	24.976	0	16.661	5
P60468	P60468	Protein transport protein Sec61 subunit beta	SEC61B	+	NaN	0.637821	NaN	0.174326	0.242355	NaN	NaN	NaN	NaN	2	2	2	27.1	27.1	27.1	9.9743	0	16.44	8
Q7KZF4;H7C597	Q7KZF4	Staphylococcal nuclease domain-containing protein 1	SND1	+	NaN	NaN	-1.76912	-1.42829	-0.803915	NaN	NaN	NaN	NaN	6	6	6	6.8	6.8	6.8	102	0	33.905	6
Q9UN86	Q9UN86	Ras GTPase-activating protein-binding protein 2	G3BP2	+	NaN	-1.719	NaN	-0.817017	-1.77264	NaN	NaN	NaN	NaN	2	2	2	5	5	5	54.12	0	14.52	3
