# Supplementary material for: Phosphoproteomic insights into processes influenced by the kinase-like protein DIA1/C3orf58
Source: PeerJ. 2018 Apr 9;6:e4599. doi: 10.7717/peerj.4599 (PMC5896498; doi:10.7717/peerj.4599)
Supplement: Supplemental Information 6 — Technical parameters of the mass spectrometry experiments and phosphosite statistics. [file peerj-06-4599-s006.xlsx]

## Sheet: phosphorylation statistics
Sample	phospho Ser	phospho Thr	phospho Tyr	multiplicity 1 (singly phosphorylated)	multiplicity 2 (doubly phosphorylated)	multiplicity 3
DIA1	1942	152	5	1608	431	60
DIA2	1878	149	6	1575	398	60
DIA3	2159	181	9	1682	570	97
DIA4	2154	178	9	1689	552	100
DIA5	2228	191	9	1751	579	98
DIA6	2091	180	8	1661	518	100
WT1	1660	138	8	1506	291	9
WT2	1838	149	7	1611	370	13
WT3	2090	182	10	1648	543	91
WT4	2041	183	9	1631	511	91
WT5	2178	185	9	1728	551	93
WT6	1436	126	5	1110	395	62
mean	1974.58	166.167	7.83333	1600	475.75	72.8333

## Sheet: MS parameters
Parameter	Value
S-Lens RF Level (%)	66.18
resolution of MS	30000
resolution of MSMS	15000
Activation Type	HCD
Min. Signal Required	10000
Isolation Width	3
Normalized Coll. Energy	27
Default Charge State	3
Activation Time	0.1
FT first mass mode	fixed at m/z
FT first mass value	100.00
Data Dependent Settings
Use separate polarity settings	disabled
Parent Mass List	(none)
Reject Mass List	(none)
Neutral Loss Mass List	(none)
Product Mass List	(none)
Neutral loss in top	3
Product in top	3
Most intense if no parent masses found	not enabled
Add/subtract mass	not enabled
FT master scan preview mode	enabled
Charge state screening	enabled
Charge state dependent ETD time	not enabled
Monoisotopic precursor selection	not enabled
Charge state rejection	enabled
Unassigned charge states	rejected
Charge state 1	rejected
Charge state 2	not rejected
Charge state 3	not rejected
Charge states 4+	not rejected
Chromatography mode	enabled
Master scan event	1
Expected peak width	5
Min signal threshold	20000
Method	phase
Triggering window	30
Global Data Dependent Settings
Predict ion injection time	enabled
Use global parent and reject mass lists	not enabled
Exclude parent mass from data dependent selection	not enabled
Exclusion mass width by mass
Exclusion mass width low	0.05
Exclusion mass width high	2.05
Parent mass width by mass
Parent mass width low	0.5
Parent mass width high	0.5
Reject mass width by mass
Reject mass width low	0.5
Reject mass width high	0.5
Zoom/UltraZoom scan mass width by mass
Zoom/UltraZoom scan mass width low	5
Zoom/UltraZoom scan mass width high	5
FT SIM scan mass width low	5
FT SIM scan mass width high	5
Neutral Loss candidates processed by decreasing intensity
Neutral Loss mass width by mass
Neutral Loss mass width low	0.5
Neutral Loss mass width high	0.5
Product candidates processed by decreasing intensity
Product mass width by mass
Product mass width low	0.5
Product mass width high	0.5
MS mass range	0.00-1000000.00
MSn mass range by mass
MSn mass range	0.00-1000000.00
Use m/z values as masses not enabled
Analog UV data dep. not enabled
Dynamic exclusion not enabled
Isotopic data dependence not enabled
Mass Tags data dependence not enabled
Normalized Collision Energy	27
