# Supplementary material for: Phosphoproteomic insights into processes influenced by the kinase-like protein DIA1/C3orf58
Source: PeerJ journal article supplement (doi:10.7717/peerj.4599), 2018-04-09

## A global analysis

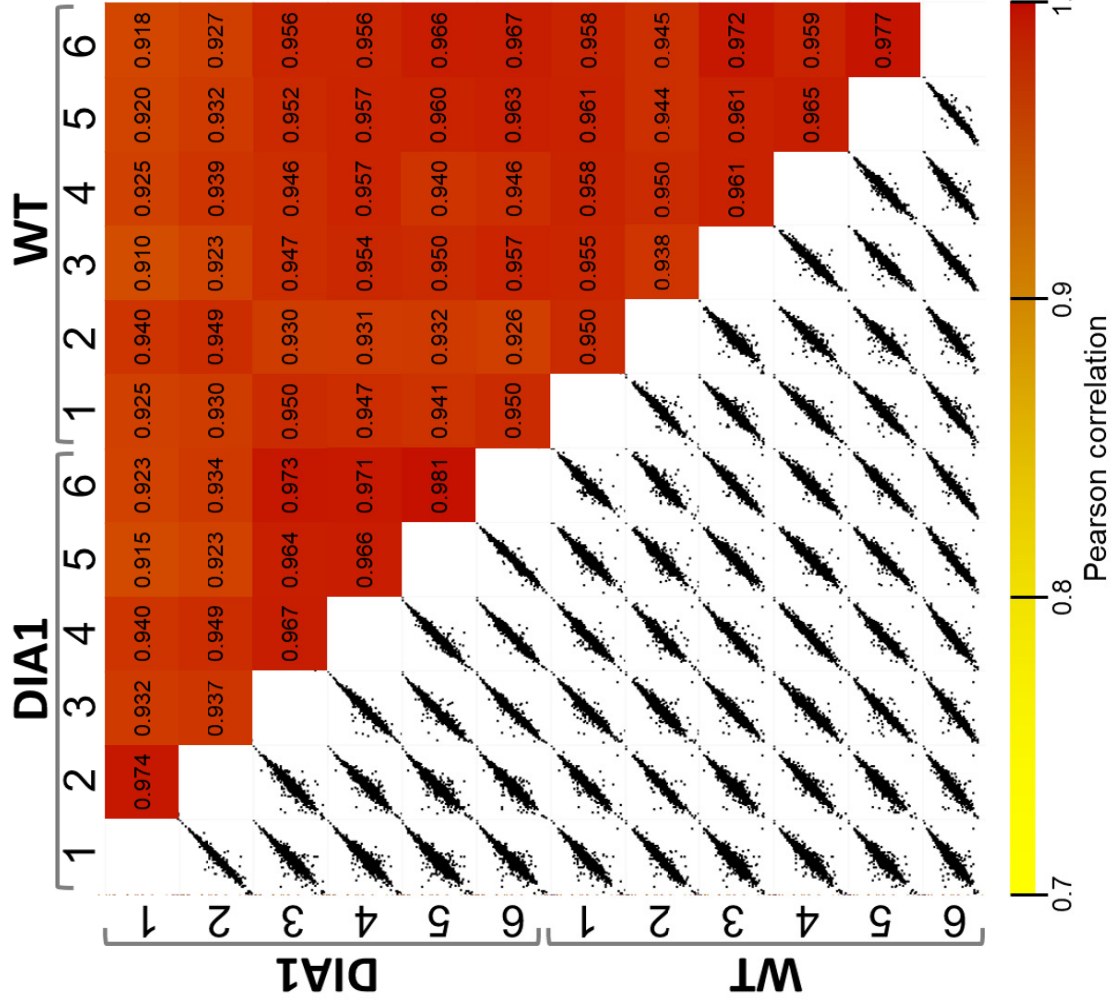

## B phosphorylation analysis

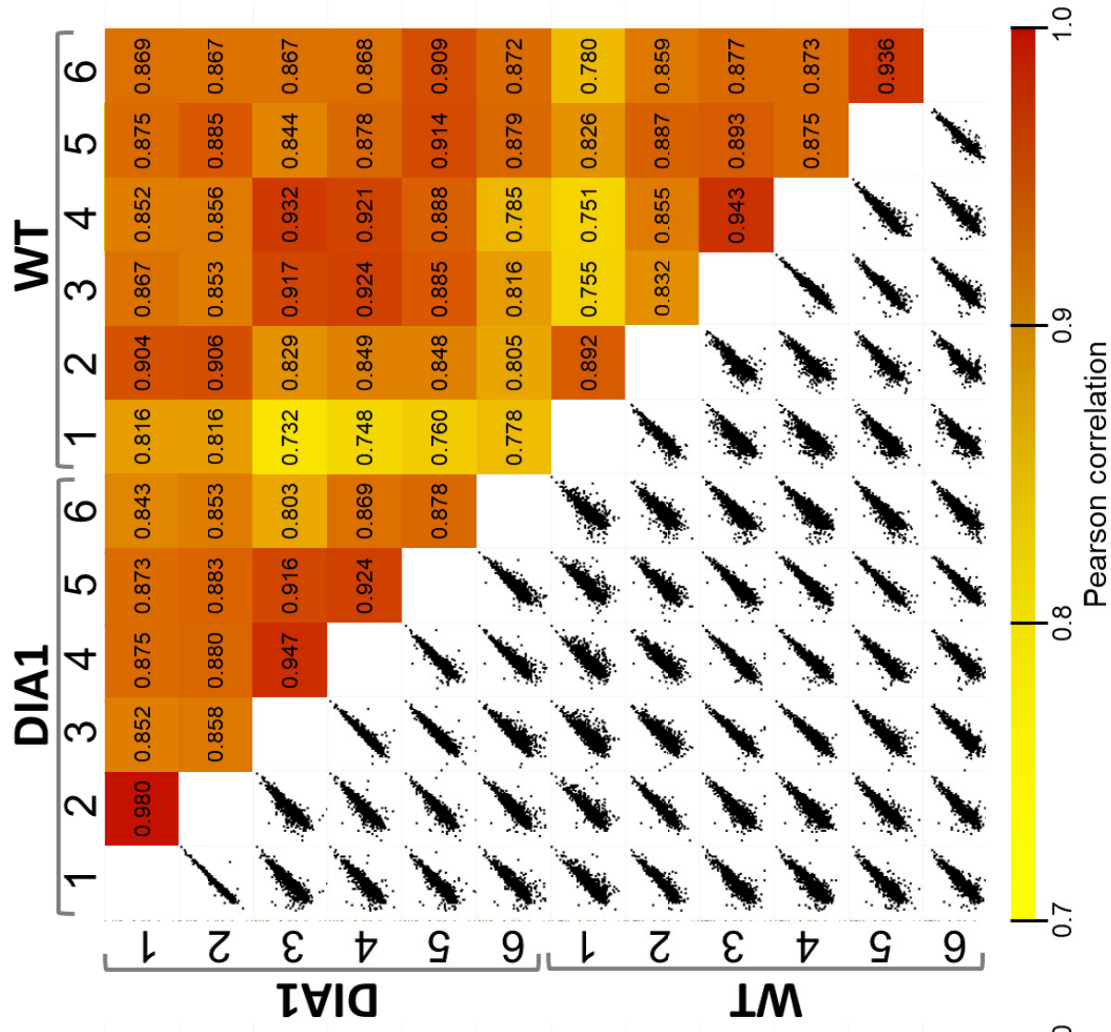

Supplement: Supplementary_figure_1_revised.pdf [file Supplementary_figure_1_revised.pdf]
